# Supplementary material for: Comment on van Casteren et al. (2018): softer metallic spheres do abrade harder enamel
Source: R Soc Open Sci. 2018 Nov 28;5(11):181376. doi: 10.1098/rsos.181376 (PMC6281914; doi:10.1098/rsos.181376)
Supplement: Supplemental Data file-Raw data [file rsos181376supp1.xlsx]

## Sheet: Fig.2-Sample 1
al-1-position 1		al-1-position 2		al-1-position 3		al-1-position 4		al-1-position 5		al-1-position 6		al-1-position 7		al-1-position 8		al-1-position 9		al-1-position 10
Depth (nm)	Load (μN)	Depth (nm)	Load (μN)	Depth (nm)	Load (μN)	Depth (nm)	Load (μN)	Depth (nm)	Load (μN)	Depth (nm)	Load (μN)	Depth (nm)	Load (μN)	Depth (nm)	Load (μN)	Depth (nm)	Load (μN)	Depth (nm)	Load (μN)
-7.89221	-0.59859	-10.2347	-0.13036	-10.1963	-0.30745	-8.15775	-0.6373	-9.84635	-0.14208	-10.3313	-0.01299	-9.3337	-0.28135	-9.27967	-0.41138	-10.5091	-0.24368	-10.5639	-0.03912
-8.05968	-0.691	-10.5727	-0.3189	-9.51745	-0.23573	-8.15643	-0.57507	-10.5254	-0.20926	-9.99121	-0.07262	-9.67266	-0.28357	-10.3008	-0.42152	-10.1687	-0.36632	-10.054	-0.25551
-8.39777	-0.63135	-10.2314	-0.19251	-9.689	-0.20592	-8.1549	-0.57507	-10.3542	-0.177	-9.48088	-0.16206	-9.50121	-0.31339	-9.79112	-0.38502	-9.99894	-0.33313	-10.2253	-0.2257
-8.39566	-0.57027	-9.8894	-0.25216	-9.52034	-0.17193	-7.98316	-0.60489	-9.84258	-0.20431	-9.48119	-0.16206	-9.49996	-0.31339	-9.96185	-0.3552	-9.99938	-0.27004	-9.71599	-0.2517
-8.05312	-0.56876	-9.71765	-0.28198	-9.52146	-0.23573	-7.98163	-0.60489	-9.84161	-0.14208	-9.48171	-0.0987	-9.15851	-0.31117	-9.62195	-0.41484	-9.48897	-0.35949	-9.71711	-0.2517
-7.8808	-0.53736	-9.88631	-0.25216	-9.35281	-0.20175	-8.15031	-0.57507	-9.32979	-0.23154	-9.4818	-0.16206	-9.15726	-0.31117	-9.45247	-0.38156	-9.4892	-0.35949	-9.54823	-0.218
-7.53805	-0.59701	-9.37414	-0.34162	-9.35414	-0.20175	-7.97857	-0.60489	-9.66902	-0.1719	-9.3121	-0.12851	-9.32623	-0.28135	-9.28278	-0.41138	-9.31921	-0.38931	-9.54935	-0.218
-7.53573	-0.59701	-9.71323	-0.21982	-9.18527	-0.23156	-7.80704	-0.57241	-9.32742	-0.23154	-9.31241	-0.12851	-8.98477	-0.27905	-9.2833	-0.41138	-9.31944	-0.38931	-9.21004	-0.27763
-7.5334	-0.59701	-9.54168	-0.18742	-9.0164	-0.26137	-7.80551	-0.57241	-9.32623	-0.23154	-8.97251	-0.1247	-8.98353	-0.27905	-9.11382	-0.37804	-9.49009	-0.29634	-9.38137	-0.24782
-7.36108	-0.56554	-9.19951	-0.30928	-9.01773	-0.26137	-7.63398	-0.53986	-9.32526	-0.16925	-8.97281	-0.1247	-8.98228	-0.27905	-9.11434	-0.37804	-9.14989	-0.35597	-9.3827	-0.18423
-7.18854	-0.59536	-9.36817	-0.27946	-9.01907	-0.26137	-7.46224	-0.56968	-9.32407	-0.16925	-8.97312	-0.1247	-8.47041	-0.36851	-9.11464	-0.4412	-8.97991	-0.38578	-9.38382	-0.18423
-7.35643	-0.56554	-9.19663	-0.24706	-9.02062	-0.1975	-7.46071	-0.56968	-8.98268	-0.16652	-9.14363	-0.09488	-8.63937	-0.33869	-9.11538	-0.37804	-8.98013	-0.38578	-8.8743	-0.27368
-7.1841	-0.53399	-9.19509	-0.24706	-8.85175	-0.22731	-7.28875	-0.66187	-8.98149	-0.16652	-8.80351	-0.15451	-8.80855	-0.24686	-8.77547	-0.43767	-8.64015	-0.38219	-8.87563	-0.21002
-7.18178	-0.53399	-9.02333	-0.27688	-8.51288	-0.223	-7.28743	-0.5995	-8.8101	-0.19634	-8.80403	-0.091	-8.63709	-0.27668	-8.606	-0.40426	-8.9808	-0.32255	-8.87675	-0.21002
-7.17946	-0.53399	-9.022	-0.21458	-8.85464	-0.16337	-7.2859	-0.5995	-9.14933	-0.1367	-8.63391	-0.18433	-8.29543	-0.33632	-8.60651	-0.40426	-8.81081	-0.35237	-9.04807	-0.18021
-6.66671	-0.56202	-8.85024	-0.2444	-8.34535	-0.25281	-7.11416	-0.62932	-8.80772	-0.19634	-8.63443	-0.12081	-8.29418	-0.33632	-8.94745	-0.34463	-8.47061	-0.412	-8.53877	-0.20592
-6.66439	-0.56202	-8.8487	-0.2444	-8.51689	-0.223	-7.11284	-0.56688	-8.63654	-0.16372	-8.46452	-0.15063	-8.12294	-0.30406	-8.60755	-0.40426	-8.64105	-0.38219	-8.70988	-0.23983
-6.66206	-0.56202	-8.67694	-0.27422	-8.34802	-0.25281	-6.9411	-0.59669	-8.46514	-0.19354	-8.46504	-0.08704	-8.29169	-0.33632	-8.60828	-0.34096	-8.47128	-0.3487	-8.54101	-0.20592
-6.65974	-0.56202	-8.5054	-0.24167	-8.34936	-0.25281	-6.76936	-0.62651	-8.46396	-0.19354	-8.29514	-0.11686	-8.12045	-0.30406	-8.09817	-0.4304	-8.4715	-0.3487	-8.37191	-0.23573
-6.65741	-0.56202	-8.50365	-0.30404	-8.1807	-0.2186	-6.76783	-0.62651	-8.29256	-0.22336	-8.46565	-0.08704	-8.1192	-0.30406	-8.2689	-0.40059	-8.30152	-0.37852	-8.54324	-0.20592
-6.65509	-0.56202	-8.50231	-0.24167	-8.35225	-0.18879	-6.59609	-0.65633	-8.6318	-0.16372	-8.12553	-0.14667	-7.77775	-0.30155	-8.09899	-0.49371	-8.30174	-0.37852	-8.37436	-0.17193
-6.65298	-0.50051	-8.50077	-0.24167	-8.01316	-0.24842	-6.76477	-0.62651	-8.2904	-0.16084	-7.78564	-0.14264	-7.7765	-0.30155	-8.26994	-0.40059	-8.13176	-0.40833	-8.20505	-0.26554
-6.48044	-0.53033	-8.32902	-0.27149	-8.0145	-0.24842	-6.42282	-0.68615	-8.11901	-0.19066	-7.95593	-0.17649	-7.60483	-0.39352	-7.93003	-0.46022	-8.1322	-0.34496	-8.20638	-0.20175
-6.1377	-0.58997	-8.32768	-0.20905	-7.67542	-0.30804	-6.5915	-0.65633	-7.94761	-0.22048	-8.12666	-0.08302	-7.94422	-0.27173	-8.10076	-0.4304	-8.13242	-0.34496	-8.03729	-0.23156
-6.13558	-0.52839	-7.98572	-0.26869	-7.84696	-0.27823	-6.24976	-0.65346	-7.94642	-0.22048	-7.78655	-0.14264	-7.60277	-0.26914	-7.76108	-0.42666	-7.96244	-0.37478	-7.86819	-0.26137
-6.13326	-0.52839	-7.98417	-0.26869	-7.67831	-0.24396	-6.41844	-0.62364	-7.94524	-0.22048	-7.78685	-0.14264	-7.43131	-0.29896	-7.76159	-0.42666	-7.79267	-0.34115	-7.6991	-0.29119
-6.13094	-0.52839	-7.81242	-0.29851	-7.84985	-0.21414	-6.2467	-0.65346	-7.94426	-0.1579	-7.44673	-0.20227	-7.42986	-0.36119	-7.5919	-0.45648	-7.62268	-0.37096	-7.87064	-0.1975
-5.9584	-0.55821	-7.98109	-0.26869	-7.51077	-0.27377	-5.90475	-0.71309	-7.77287	-0.18772	-7.61725	-0.17246	-7.25861	-0.32878	-7.76241	-0.49004	-7.7929	-0.40459	-7.70133	-0.29119
-5.78608	-0.52638	-7.80933	-0.29851	-7.34211	-0.23942	-6.07364	-0.62069	-7.60147	-0.21754	-7.44756	-0.13854	-7.25737	-0.32878	-7.59294	-0.45648	-7.62314	-0.37096	-7.70266	-0.22731
-5.61354	-0.5562	-7.63758	-0.32833	-7.51344	-0.27377	-5.9019	-0.65051	-7.60029	-0.21754	-7.44808	-0.07474	-7.25612	-0.32878	-7.42346	-0.42285	-7.28294	-0.43059	-7.70378	-0.22731
-5.78143	-0.52638	-7.63624	-0.26582	-7.34479	-0.23942	-5.90037	-0.65051	-7.25868	-0.27717	-7.44817	-0.13854	-7.25509	-0.26648	-7.42377	-0.48629	-7.28316	-0.43059	-7.36469	-0.223
-5.77911	-0.52638	-7.6347	-0.26582	-7.0057	-0.29905	-5.89884	-0.65051	-7.42792	-0.1847	-7.44869	-0.07474	-6.91342	-0.32612	-7.4245	-0.42285	-7.28339	-0.43059	-7.36581	-0.223
-5.43657	-0.5243	-7.46295	-0.29563	-7.17725	-0.26923	-5.7271	-0.68032	-7.25652	-0.21452	-7.10857	-0.13437	-6.91218	-0.32612	-6.91439	-0.51229	-7.45383	-0.40078	-7.53713	-0.19318
-5.43425	-0.5243	-7.46162	-0.23305	-7.00859	-0.23481	-5.55557	-0.64748	-7.42554	-0.1847	-6.93866	-0.16418	-6.74072	-0.35594	-7.25533	-0.45266	-6.94363	-0.42671	-7.19783	-0.25281
-5.43192	-0.5243	-7.28986	-0.26287	-7.17992	-0.26923	-5.55404	-0.64748	-7.08394	-0.24434	-6.93897	-0.16418	-6.9099	-0.26375	-7.08585	-0.41896	-7.28428	-0.36708	-7.36937	-0.15898
-5.2596	-0.49232	-6.94789	-0.3225	-6.84084	-0.32886	-5.55251	-0.64748	-7.08275	-0.24434	-6.93927	-0.16418	-6.73823	-0.35594	-6.91616	-0.44877	-6.77387	-0.45652	-7.02985	-0.28262
-5.25727	-0.49232	-6.94635	-0.3225	-6.67218	-0.29444	-5.38076	-0.6773	-6.91157	-0.21143	-7.11	-0.0705	-6.56699	-0.32339	-6.91667	-0.44877	-6.7741	-0.45652	-6.86097	-0.24842
-5.08474	-0.52214	-7.11523	-0.23003	-6.67352	-0.29444	-5.20902	-0.70712	-6.74017	-0.24125	-6.9401	-0.10031	-6.39553	-0.35321	-6.74698	-0.47859	-6.60433	-0.42275	-6.69188	-0.27823
-5.08242	-0.52214	-6.94326	-0.3225	-6.67486	-0.29444	-5.03728	-0.73694	-6.73899	-0.24125	-6.6002	-0.09599	-6.39429	-0.35321	-6.57751	-0.44482	-6.94498	-0.36312	-6.86342	-0.18433
-5.0803	-0.46027	-6.77172	-0.28967	-6.50598	-0.32425	-5.20618	-0.64439	-6.7378	-0.24125	-6.43029	-0.12581	-6.22283	-0.38303	-6.74802	-0.47859	-6.60478	-0.42275	-6.86454	-0.18433
-4.90777	-0.4901	-6.94039	-0.25985	-6.50732	-0.32425	-5.20464	-0.64439	-6.90683	-0.21143	-6.4306	-0.12581	-6.22159	-0.38303	-6.57854	-0.44482	-6.77522	-0.39293	-6.86565	-0.18433
-4.73545	-0.45798	-6.93884	-0.25985	-6.33866	-0.28976	-5.20333	-0.58159	-6.56522	-0.27107	-6.60111	-0.09599	-6.05035	-0.35041	-6.40885	-0.47463	-6.43502	-0.45256	-6.35614	-0.27377
-4.56291	-0.4878	-6.25667	-0.3164	-6.34	-0.28976	-5.03137	-0.67421	-6.39404	-0.23809	-6.4312	-0.12581	-6.0491	-0.35041	-6.23916	-0.50444	-6.26525	-0.41872	-6.35725	-0.27377
-4.56038	-0.54974	-6.59555	-0.25676	-6.00114	-0.28501	-4.86006	-0.57835	-6.39285	-0.23809	-6.2613	-0.15562	-6.04786	-0.35041	-6.23989	-0.44078	-6.26548	-0.41872	-6.35859	-0.20961
-4.55826	-0.4878	-6.594	-0.25676	-6.34267	-0.28976	-4.51789	-0.70086	-6.56209	-0.1454	-6.09161	-0.12142	-6.21682	-0.32059	-6.24041	-0.44078	-6.09528	-0.51219	-6.3597	-0.20961
-4.55594	-0.4878	-6.42225	-0.28658	-6.00381	-0.28501	-4.68679	-0.60817	-6.05027	-0.23485	-5.9217	-0.15123	-5.70516	-0.34753	-6.24093	-0.44078	-6.0955	-0.51219	-6.19061	-0.23942
-4.38361	-0.4556	-6.42092	-0.22378	-5.83494	-0.31482	-4.51505	-0.63799	-6.21908	-0.2679	-6.09222	-0.12142	-5.5337	-0.37735	-5.90103	-0.50041	-6.43636	-0.3889	-6.19172	-0.23942
-4.21108	-0.48543	-6.24916	-0.2536	-5.83627	-0.31482	-4.68373	-0.60817	-5.87769	-0.26467	-6.09252	-0.12142	-5.70267	-0.34753	-6.07176	-0.4706	-5.92617	-0.41461	-5.85242	-0.29905
-4.03876	-0.45316	-6.07741	-0.28342	-5.6674	-0.34463	-4.51198	-0.63799	-5.8765	-0.26467	-6.09304	-0.05733	-5.53121	-0.37735	-5.90228	-0.43668	-5.75619	-0.44443	-5.85353	-0.29905
-4.37685	-0.39352	-6.07608	-0.22055	-5.49874	-0.30999	-4.17025	-0.63467	-6.04574	-0.17191	-5.75293	-0.11696	-5.70018	-0.34753	-5.9028	-0.43668	-5.7562	-0.50816	-5.68444	-0.32886
-4.03411	-0.45316	-6.07453	-0.22055	-5.67029	-0.28018	-4.1685	-0.69762	-5.70392	-0.29449	-5.58302	-0.14677	-5.52872	-0.37735	-5.39269	-0.52612	-5.92685	-0.41461	-5.85599	-0.23481
-3.86179	-0.42083	-5.56214	-0.37287	-5.50142	-0.30999	-4.16718	-0.63467	-5.70274	-0.29449	-5.41311	-0.17658	-5.01706	-0.40422	-5.73363	-0.46649	-5.75708	-0.38063	-5.68689	-0.26463
-3.85946	-0.42083	-5.90123	-0.25036	-5.50275	-0.30999	-3.99544	-0.66449	-5.70176	-0.23155	-5.58363	-0.14677	-5.18602	-0.3744	-5.56393	-0.49631	-5.58709	-0.41044	-5.85822	-0.23481
-3.85714	-0.42083	-5.55927	-0.31	-5.50409	-0.30999	-3.99391	-0.66449	-5.70058	-0.23155	-5.41394	-0.11242	-5.35478	-0.40717	-5.56467	-0.4325	-5.41711	-0.44025	-5.51913	-0.23014
-3.85503	-0.3586	-5.38751	-0.33981	-4.9948	-0.39943	-3.99238	-0.66449	-5.52918	-0.26136	-5.41424	-0.11242	-5.18353	-0.3744	-5.56519	-0.4325	-5.41733	-0.44025	-5.35004	-0.25995
-3.8527	-0.3586	-5.55618	-0.31	-4.99635	-0.33491	-3.82086	-0.63129	-5.35778	-0.29118	-5.24456	-0.078	-5.1825	-0.31175	-5.2255	-0.42826	-5.24713	-0.53387	-5.35115	-0.25995
-3.51017	-0.35594	-5.72506	-0.21724	-5.1679	-0.3051	-3.64912	-0.66111	-5.35681	-0.22817	-5.07443	-0.17205	-5.01105	-0.34157	-5.22602	-0.42826	-5.24757	-0.47007	-5.52248	-0.23014
-3.50785	-0.35594	-5.21289	-0.30669	-5.16924	-0.3051	-3.47737	-0.69093	-5.1852	-0.321	-4.90452	-0.20186	-4.83959	-0.37138	-5.05633	-0.45807	-5.07759	-0.49988	-5.18317	-0.28976
-3.50574	-0.29357	-5.55176	-0.24706	-5.17057	-0.3051	-3.47584	-0.69093	-5.18423	-0.25798	-4.73462	-0.23167	-5.00877	-0.27884	-4.88664	-0.48788	-5.24824	-0.40619	-5.0143	-0.2552
-3.50362	-0.23113	-5.0398	-0.27349	-4.83149	-0.36472	-3.47431	-0.69093	-5.01283	-0.2878	-5.07556	-0.10782	-4.66732	-0.27568	-5.05736	-0.45807	-4.73783	-0.49563	-5.01541	-0.2552
-3.33109	-0.26095	-5.03804	-0.33651	-4.66261	-0.39453	-3.47278	-0.69093	-5.01165	-0.2878	-4.90565	-0.13763	-4.32544	-0.39811	-5.05788	-0.45807	-5.07848	-0.436	-5.01653	-0.2552
-3.32898	-0.19844	-5.03671	-0.27349	-4.66395	-0.39453	-3.13083	-0.75056	-4.67004	-0.34743	-4.90596	-0.13763	-4.66483	-0.27568	-4.54777	-0.54751	-5.07871	-0.436	-4.84743	-0.28501
-3.32687	-0.13586	-4.86496	-0.30331	-4.66551	-0.32994	-3.29951	-0.72074	-5.00928	-0.2878	-4.56584	-0.19725	-4.49337	-0.30549	-4.88871	-0.48788	-4.5683	-0.52545	-4.84877	-0.22056
-2.98412	-0.19549	-4.86341	-0.30331	-4.49663	-0.35975	-2.95777	-0.71729	-4.66789	-0.28435	-4.39593	-0.22706	-4.32192	-0.33531	-4.71924	-0.45375	-4.56874	-0.4615	-4.84967	-0.28501
-2.98201	-0.13284	-4.69187	-0.27004	-4.66818	-0.32994	-3.12645	-0.68747	-4.6667	-0.28435	-4.56667	-0.13295	-4.32046	-0.39811	-4.54954	-0.48356	-4.90939	-0.40187	-4.68079	-0.25037
-2.80948	-0.16266	-4.69012	-0.33313	-4.15911	-0.35471	-3.12492	-0.68747	-4.4953	-0.31417	-4.39676	-0.16276	-3.979	-0.39494	-4.55028	-0.41954	-4.56898	-0.52545	-4.51148	-0.34463
-2.63716	-0.12975	-4.51858	-0.29986	-4.16022	-0.41937	-2.95318	-0.71729	-4.49412	-0.31417	-4.39685	-0.22706	-3.97755	-0.45774	-4.21038	-0.47917	-4.229	-0.52112	-4.51281	-0.28018
-2.80504	-0.09993	-4.51703	-0.29986	-4.16178	-0.35471	-2.78166	-0.68394	-4.32272	-0.34398	-4.22738	-0.1282	-4.14673	-0.36513	-4.3811	-0.44936	-4.39943	-0.49131	-4.17351	-0.3398
-2.80293	-0.03714	-4.34528	-0.32968	-4.1629	-0.41937	-2.78012	-0.68394	-4.32153	-0.34398	-4.05747	-0.15801	-3.80506	-0.42476	-4.21141	-0.47917	-4.22966	-0.45711	-4.34505	-0.24548
-2.6304	-0.06695	-4.51416	-0.2367	-4.16445	-0.35471	-2.9488	-0.65413	-4.15014	-0.3738	-4.05778	-0.15801	-3.6336	-0.45458	-4.21193	-0.47917	-4.22989	-0.45711	-4.34617	-0.24548
-2.28787	-0.06372	-4.3424	-0.26652	-3.9958	-0.31978	-2.60707	-0.65053	-4.14895	-0.3738	-4.05808	-0.15801	-3.80278	-0.36189	-4.04246	-0.44489	-4.23011	-0.45711	-4.17707	-0.27529
-2.45575	-0.0339	-4.17065	-0.29634	-3.99692	-0.38452	-2.77575	-0.62071	-3.97777	-0.34046	-3.88839	-0.12338	-3.80154	-0.36189	-3.87276	-0.4747	-3.88992	-0.51673	-4.00798	-0.3051
-2.45364	0.02904	-3.99889	-0.32615	-3.48784	-0.40921	-2.43423	-0.55367	-3.97659	-0.34046	-3.8887	-0.12338	-3.80029	-0.36189	-3.87328	-0.4747	-3.71993	-0.54654	-3.83888	-0.33491
-2.28132	0.06223	-3.99735	-0.32615	-3.8296	-0.34959	-2.26248	-0.58348	-3.9754	-0.34046	-3.71857	-0.21763	-3.28863	-0.3884	-3.70359	-0.50452	-3.72038	-0.48245	-3.84	-0.33491
-2.279	0.06223	-3.99581	-0.32615	-3.66072	-0.3794	-2.26095	-0.58348	-3.80422	-0.30705	-3.71909	-0.15318	-3.28717	-0.45134	-3.70433	-0.44036	-3.89081	-0.45264	-3.84133	-0.27032
-1.93647	0.06568	-3.82427	-0.29274	-3.49207	-0.34441	-2.25942	-0.58348	-3.97324	-0.27723	-3.7194	-0.15318	-3.45635	-0.35858	-3.70463	-0.50452	-3.72083	-0.48245	-3.84245	-0.27032
-2.10457	0.15865	-3.82272	-0.29274	-3.49319	-0.40921	-2.25811	-0.52004	-3.80185	-0.30705	-3.54971	-0.11848	-3.45511	-0.35858	-3.53515	-0.47017	-3.55106	-0.4481	-3.67336	-0.30013
-1.93204	0.12883	-3.48076	-0.35237	-3.32431	-0.43902	-2.25658	-0.52004	-3.46046	-0.30338	-3.55002	-0.11848	-3.28387	-0.32539	-3.53567	-0.47017	-3.38086	-0.54208	-3.50426	-0.32994
-1.75972	0.16224	-3.47943	-0.28907	-3.32565	-0.43902	-1.91484	-0.51615	-3.28884	-0.39649	-3.38011	-0.14829	-3.11241	-0.3552	-3.36598	-0.49998	-3.38108	-0.54208	-3.33539	-0.29509
-1.92761	0.19206	-3.64788	-0.32255	-3.157	-0.40403	-2.08374	-0.42275	-3.28787	-0.33319	-3.21042	-0.11351	-2.94117	-0.32193	-3.36672	-0.43574	-3.38152	-0.47792	-3.3365	-0.29509
-1.75529	0.22554	-3.47634	-0.28907	-3.15833	-0.40403	-1.742	-0.41872	-3.28669	-0.33319	-3.21073	-0.11351	-2.93992	-0.32193	-2.85639	-0.58942	-3.38153	-0.54208	-3.50783	-0.26528
-1.75318	0.2889	-3.47479	-0.28907	-3.15967	-0.40403	-1.91068	-0.3889	-3.28529	-0.39649	-3.04082	-0.14332	-3.10911	-0.22896	-3.53775	-0.47017	-3.21177	-0.50773	-3.33873	-0.29509
-1.75107	0.35234	-3.30304	-0.31889	-2.82081	-0.39877	-1.73894	-0.41872	-3.28431	-0.33319	-3.04134	-0.07866	-3.27807	-0.19914	-3.19806	-0.46556	-3.04178	-0.53754	-2.99943	-0.35471
-1.40876	0.4198	-2.96108	-0.37852	-2.99235	-0.36896	-1.73763	-0.35499	-2.94271	-0.39282	-2.87122	-0.17313	-2.42577	-0.34822	-3.02837	-0.49537	-2.87179	-0.56735	-2.83055	-0.31978
-1.40643	0.4198	-3.12996	-0.28533	-2.82348	-0.39877	-1.73631	-0.29119	-2.94174	-0.32945	-2.87174	-0.10847	-2.42474	-0.285	-2.68869	-0.49069	-2.70203	-0.53293	-2.83167	-0.31978
-1.57454	0.51326	-3.12841	-0.28533	-2.82504	-0.33382	-1.56479	-0.25713	-2.94055	-0.32945	-2.87205	-0.10847	-2.59371	-0.25518	-2.6892	-0.49069	-2.87246	-0.50312	-3.003	-0.28997
-1.40222	0.54717	-2.95666	-0.31515	-2.48595	-0.39344	-1.39327	-0.223	-2.93937	-0.32945	-2.70236	-0.07355	-2.59246	-0.25518	-2.68972	-0.49069	-2.87269	-0.50312	-3.00411	-0.28997
-1.40033	0.67483	-2.7849	-0.34496	-2.6575	-0.36363	-1.39174	-0.223	-2.76819	-0.29583	-2.70266	-0.07355	-2.2508	-0.31481	-2.86045	-0.46087	-2.53249	-0.56274	-3.00523	-0.28997
-1.22801	0.70896	-2.61336	-0.31133	-2.48841	-0.45839	-1.39042	-0.15898	-2.767	-0.29583	-2.36255	-0.13317	-2.07934	-0.34463	-2.52077	-0.45612	-2.70315	-0.46863	-2.49593	-0.3146
-1.0557	0.74315	-2.61182	-0.31133	-2.31997	-0.35823	-1.2189	-0.12471	-2.59582	-0.26213	-2.36307	-0.06837	-2.41873	-0.2217	-2.52129	-0.45612	-2.53316	-0.49844	-2.49705	-0.3146
-1.05359	0.80723	-2.78049	-0.28152	-2.1511	-0.38803	-1.21759	-0.06055	-2.25421	-0.32176	-2.36337	-0.06837	-2.41749	-0.2217	-2.5218	-0.45612	-2.36318	-0.52825	-2.49817	-0.3146
-1.05148	0.87138	-2.60895	-0.24782	-2.15244	-0.38803	-1.04606	-0.02613	-2.42324	-0.29194	-2.36368	-0.06837	-2.24603	-0.25151	-2.35233	-0.42148	-2.19319	-0.55806	-2.4995	-0.24972
-1.04938	0.9356	-2.43719	-0.27763	-2.49419	-0.32842	-1.04453	-0.02613	-2.25163	-0.38527	-2.02356	-0.12798	-1.90458	-0.24777	-2.18264	-0.4513	-2.36385	-0.46387	-2.1602	-0.30934
-0.87706	0.97008	-2.43565	-0.27763	-2.15511	-0.38803	-1.04344	0.10254	-2.25044	-0.38527	-1.85366	-0.15779	-2.07376	-0.15451	-2.18316	-0.4513	-2.19386	-0.49368	-2.33152	-0.27953
-0.70497	1.06906	-2.43411	-0.27763	-2.15667	-0.32294	-1.21234	0.19679	-2.41968	-0.29194	-2.19438	-0.09817	-2.07273	-0.091	-2.01347	-0.48111	-2.02387	-0.5235	-2.16243	-0.30934
-0.70286	1.13357	-2.26257	-0.24386	-1.81759	-0.38256	-0.87083	0.26627	-1.90786	-0.38138	-2.02469	-0.06311	-2.2417	-0.06119	-2.0142	-0.41659	-1.85389	-0.55331	-1.99355	-0.2742
-0.70076	1.19815	-2.09081	-0.27368	-1.81914	-0.31739	-0.86952	0.33093	-1.90668	-0.38138	-2.025	-0.06311	-1.73004	-0.08704	-1.84451	-0.4464	-2.02411	-0.58787	-1.99445	-0.33915
-0.69887	1.32751	-2.08948	-0.21002	-1.99091	-0.22235	-0.86843	0.46045	-1.90571	-0.3178	-1.68488	-0.12273	-1.5588	-0.0532	-2.01524	-0.41659	-1.85434	-0.55331	-1.99579	-0.2742
-0.69677	1.3923	-1.91773	-0.23983	-1.82204	-0.25216	-0.69691	0.49551	-2.07473	-0.28798	-1.68518	-0.12273	-1.55756	-0.0532	-1.84577	-0.38181	-1.68457	-0.51867	-1.82691	-0.23899
-0.35447	1.46248	-1.91619	-0.23983	-1.65339	-0.21666	-0.52538	0.53064	-1.90355	-0.25414	-1.5155	-0.08759	-1.89695	0.07015	-1.67608	-0.41162	-1.85501	-0.48886	-1.99824	-0.20918
-0.35258	1.59256	-1.91464	-0.23983	-1.65472	-0.21666	-0.52407	0.59565	-1.73215	-0.28396	-1.68601	-0.05778	-1.5555	0.07432	-1.67681	-0.34695	-1.68524	-0.45415	-1.82914	-0.23899
-0.18027	1.62789	-1.7431	-0.20592	-1.48585	-0.24647	-0.52277	0.66074	-1.39055	-0.34358	-1.51633	-0.02257	-1.38426	0.10838	-1.5069	-0.44143	-1.51526	-0.48396	-1.83048	-0.1739
-0.51881	1.81801	-1.57113	-0.29946	-1.48741	-0.18109	-0.35147	0.76131	-1.55979	-0.25004	-1.51663	-0.02257	-1.21302	0.14251	-1.33743	-0.40657	-1.51548	-0.48396	-1.32119	-0.19816
-0.17629	1.82376	-1.74002	-0.20592	-1.48897	-0.11564	-0.35016	0.8266	-1.5586	-0.25004	-1.34695	0.01271	-1.38199	0.17232	-1.33795	-0.40657	-1.51593	-0.41937	-1.49251	-0.16835
-0.00398	1.85938	-1.39827	-0.20175	-1.4903	-0.11564	-0.34907	0.95741	-1.55764	-0.18624	-1.51768	0.10768	-1.21075	0.20652	-1.5089	-0.31203	-1.34616	-0.38452	-1.66406	-0.07331
0.16811	1.96065	-1.56693	-0.17193	-1.15144	-0.10974	-0.34799	1.0885	-1.21603	-0.24587	-1.348	0.1431	-1.20972	0.2706	-1.33942	-0.27703	-1.34639	-0.38452	-1.49497	-0.10312
--	--	-1.56561	-0.10806	-1.153	-0.04414	-0.34668	1.15415	-1.21484	-0.24587	-1.34853	0.20841	-1.03849	0.30495	-1.33994	-0.27703	-1.17662	-0.34959	-1.32609	-0.06762
0	2.0561	-1.56428	-0.04412	-0.98413	-0.07395	-0.17539	1.25587	-1.38408	-0.15218	-1.17884	0.24397	-1.20767	0.39898	-1.17047	-0.24197	-1.17685	-0.34959	-1.32743	-0.00225
0.17298	1.89508	-1.05211	-0.13356	-0.98569	-0.00829	-0.1743	1.38767	-1.2129	-0.11805	-1.17915	0.24397	-1.03643	0.43347	-1.00078	-0.27177	-1.00708	-0.3146	-1.32877	0.0632
0.34485	2.0622	-1.22099	-0.03973	-1.15746	0.08725	-0.17345	1.5859	-1.38215	-0.02423	-1.35011	0.40474	-1.03563	0.56228	-1.17195	-0.112	-1.00753	-0.24972	-0.98969	0.06911
0.17674	2.1578	-1.21944	-0.03973	-0.98881	0.12325	-0.17237	1.71842	-1.21097	0.01005	-1.18042	0.44052	-0.69418	0.56717	-1.17269	-0.04691	-1.00775	-0.24972	-0.9908	0.06911
0.51655	2.95988	-1.04791	-0.00546	-0.99037	0.18913	-0.00108	1.82141	-0.86936	-0.04958	-0.84053	0.44657	-0.86315	0.59698	-1.003	-0.07672	-1.0082	-0.18477	-0.99214	0.1347
1.0263	3.81191	-1.21679	0.08851	-0.99193	0.25508	--	--	-0.8684	0.01458	-0.84106	0.5123	-0.69213	0.6964	-0.83375	0.02387	-0.83844	-0.14956	-0.99348	0.20036
1.19582	4.66878	-1.04526	0.12293	-0.82351	0.35738	0	1.95449	-0.86743	0.07881	-0.84158	0.5781	-0.86132	0.79094	-0.83449	0.08917	-0.83888	-0.08447	-0.99482	0.26609
1.53575	5.43832	-0.87372	0.15742	-0.82507	0.42354	-0.33889	2.0141	-0.69625	0.11329	-0.84211	0.64397	-0.86051	0.9206	-0.83523	0.15455	-0.83933	-0.01931	-0.82595	0.30209
1.8754	6.28852	-0.87218	0.15742	-0.82663	0.48977	0.00283	2.02114	-0.69506	0.11329	-0.50222	0.65031	-0.6895	1.02073	-0.83597	0.22	-0.83978	0.04592	-0.65708	0.33815
2.21501	7.15075	-0.87085	0.22179	-0.65821	0.59265	0.17435	2.05806	-0.69432	0.2421	-0.67296	0.74613	-0.51826	1.056	-0.66672	0.3213	-0.67001	0.08142	-0.65842	0.4041
2.55483	7.95275	-0.86974	0.35074	-0.65977	0.65909	0.17337	2.79666	-0.86356	0.33643	-0.67371	0.87837	-0.34725	1.15657	-0.83768	0.41676	-0.67046	0.14679	-0.65976	0.47012
2.89461	8.76501	-0.69821	0.38551	-0.66156	0.7922	0.51255	3.55263	-0.69238	0.3712	-0.67447	1.0109	-0.34645	1.28723	-0.49822	0.48868	-0.50092	0.24795	-0.83154	0.63217
3.06389	9.69125	-0.69711	0.51489	-0.49314	0.89579	0.51103	4.44771	-0.69164	0.50058	-0.50479	1.04747	-0.51564	1.38247	-0.49896	0.55456	-0.50137	0.31353	-0.66267	0.6686
3.4036	10.5249	-0.52557	0.54988	-0.49493	1.02946	0.67993	5.25482	-0.52068	0.60044	-0.50554	1.18042	-0.17442	1.45394	-0.49971	0.6205	-0.67203	0.409	-0.49402	0.77147
3.40311	11.3526	-0.52425	0.61475	-0.32628	1.0666	0.84855	6.14323	-0.34951	0.63557	-0.5063	1.31366	-0.34383	1.61512	-0.5009	0.81876	-0.50249	0.51072	-0.32516	0.80811
3.91322	12.0996	-0.69336	0.77451	-0.32808	1.2007	1.01737	6.97167	-0.51875	0.73038	-0.16664	1.38758	-0.17282	1.71696	-0.33143	0.85519	-0.50316	0.64254	-0.49693	0.97101
4.08288	12.9148	-0.52204	0.87493	-0.32987	1.33509	1.18641	7.7376	-0.51801	0.86062	-0.3376	1.55119	-0.17203	1.8489	-0.3324	0.98786	-0.33363	0.74484	-0.32829	1.0746
4.59267	13.7571	-0.35073	0.97564	-0.16123	1.37259	1.52537	8.55592	-0.34706	0.96133	-0.50835	1.648	-0.00102	1.95132	-0.33315	1.0543	-0.33408	0.811	-0.32986	1.20827
4.762	14.6691	-0.34941	1.04101	0.00696	1.54512	1.52389	9.44402	-0.17588	0.99689	-0.16892	1.78986	--	--	-0.33412	1.1874	-0.16477	0.98009	-0.161	1.24541
5.10178	15.4819	-0.34831	1.17195	-0.16482	1.6425	1.35241	10.2969	-0.34558	1.22322	-0.16968	1.92453	0	2.01754	0.00533	1.26118	-0.16522	1.04653	0.00764	1.34971
5.44153	16.3034	-0.17678	1.20773	0.0036	1.74808	1.86148	11.1153	-0.34484	1.35459	--	--	0.000794	2.15019	-0.16608	1.49159	-0.16589	1.17963	-0.16391	1.44666
5.78125	17.1334	-0.17591	1.40489	0.0018	1.88375	1.86015	11.9564	-0.00368	1.42664	0	1.96216	0.00227	2.08383	-0.16705	1.62568	-0.16657	1.31301	-0.16571	1.64856
5.95101	17.9199	-0.17459	1.47076	--	--	2.02927	12.6987	-0.17315	1.58838	-0.17143	2.26242	0.3437	2.09058	0.00218	1.73026	-0.16748	1.51362	0.17336	1.6564
6.29039	18.8492	-0.00328	1.57289	0	2.0197	2.02762	13.6346	-0.0022	1.6908	-0.00153	2.23263	0.34222	2.89246	0.17142	1.83513	0.17226	1.58811	0.00135	1.88894
6.6303	19.6215	0.16802	1.67532	0.33862	2.09635	2.36662	14.442	-0.00169	1.88968	-0.00206	2.30042	0.85111	3.68332	--	--	0.00137	1.75229	--	--
6.9702	20.401	0.16912	1.80783	-0.00337	2.22416	2.36518	15.3175	-0.000959	2.02261	0.16576	2.88397	1.1895	4.58514	0	2.06745	0.17089	1.85715	0	1.95667
7.13957	21.3023	--	--	-0.00471	2.22416	2.19377	16.1506	--	--	0.6728	3.76014	1.35788	5.46058	-0.17096	2.16491	--	--	-0.34223	2.21986
7.3089	22.2122	0	1.97043	0.33181	2.91974	2.53296	16.9016	0	2.08919	0.83986	4.56906	1.69667	6.24726	0.16894	2.10531	0	2.0219	-0.00292	2.16027
7.81893	22.9847	0.000638	2.23687	0.49785	3.72358	2.53171	17.7192	-0.16948	2.25235	1.17685	5.42966	2.03542	7.0442	-0.00225	2.27062	0.68131	1.70038	0.16594	2.19848
8.15872	23.7941	0.34283	2.11055	0.83383	4.57868	2.87058	18.5674	0.00192	2.22255	1.684	6.2725	2.3739	7.92408	0.1649	2.99126	9e-06	1.88695	0.16226	2.95128
8.49849	24.6106	0.34415	2.17726	0.99979	5.40387	2.86899	19.4835	0.00288	2.28934	1.85095	7.11388	2.71258	8.74238	0.33153	3.85943	0.16931	2.05968	0.49874	3.72274
8.66802	25.4639	0.51362	2.81856	1.16572	6.23931	2.86767	20.3239	0.3422	2.90153	2.18807	7.93573	3.05122	9.57093	0.49861	4.59885	0.33651	2.84639	0.83495	4.57503
9.00773	26.2947	0.68237	3.67181	1.67204	7.02545	3.03653	21.1416	0.68057	3.7944	2.3552	8.72291	3.38958	10.4851	0.66517	5.48922	0.50369	3.64335	1.00115	5.39764
9.00701	27.1919	1.02129	4.50729	1.8379	7.8814	3.03515	21.9962	0.6787	4.69132	2.69225	9.56442	3.72841	11.2588	0.83194	6.31948	0.67059	4.52076	1.16731	6.2305
9.51689	28.0072	1.36041	5.28461	2.00373	8.74759	3.20425	22.7417	0.67728	5.45963	3.02927	10.4162	3.897	12.0709	0.99867	7.15999	1.0079	5.30928	1.50339	7.11702
9.85684	28.7679	1.35884	6.20279	2.16978	9.54811	3.20283	23.6098	1.01576	6.31915	3.36651	11.201	4.23578	12.8619	1.16537	8.01075	1.00476	6.16762	1.49927	8.001
9.85604	29.6858	1.86809	6.97167	2.50575	10.4042	3.3716	24.4553	1.18423	7.14844	3.53326	12.1022	4.23383	13.7995	1.33229	8.79713	1.17179	7.00641	1.83579	8.76077
10.3662	30.429	2.20711	7.78059	2.67174	11.2227	3.37043	25.2491	1.18247	8.01774	3.87044	12.905	4.57255	14.6084	1.49892	9.66753	1.33879	7.85545	2.34224	9.57509
10.5355	31.3307	2.37562	8.70322	3.00765	12.0984	3.53915	26.1081	1.52108	8.83774	3.69723	13.7262	4.74129	15.3757	1.66578	10.4719	1.33579	8.67003	2.33801	10.489
10.7052	32.1454	2.54435	9.56326	3.00363	12.8856	3.87805	26.9445	2.02987	9.63822	4.20457	14.5157	5.07967	16.282	1.8326	11.2849	1.50298	9.46345	2.50449	11.2286
10.8748	32.9658	2.7133	10.3582	2.99932	13.7598	3.87682	27.7569	2.02826	10.4629	4.5414	15.4247	5.24837	17.0649	1.9994	12.1065	2.0103	10.282	2.67068	12.0533
11.0445	33.7921	2.88222	11.1617	3.16547	14.5321	4.04547	28.6365	2.36677	11.3128	4.70853	16.2099	5.58697	17.9075	1.99596	12.9665	1.83674	11.2298	2.83684	12.8867
11.384	34.6905	3.39127	11.9912	3.33132	15.3929	4.0442	29.461	2.36509	12.1554	5.04557	17.0551	5.92553	18.7588	2.1627	13.8053	2.17431	11.9432	3.00297	13.7287
11.7238	35.4992	3.73034	12.783	3.66734	16.2326	4.04291	30.2913	2.53359	12.9769	5.38258	17.9088	6.09415	19.5645	2.49962	14.623	2.17116	12.8016	3.16907	14.5793
11.7234	36.2757	3.89891	13.6917	3.6632	17.0575	4.0416	31.1273	2.53186	13.8367	5.54964	18.7168	6.43295	20.3476	2.49609	15.5088	2.16799	13.6686	3.50535	15.4088
11.893	37.125	4.06771	14.5312	3.65904	17.8895	4.38068	31.9097	3.04072	14.6159	5.8866	19.587	6.60123	21.2528	2.66302	16.2918	2.335	14.5145	3.50119	16.3064
12.2327	37.9504	4.40696	15.2694	3.99498	18.7535	4.37933	32.7572	3.03919	15.4129	6.05361	20.4099	6.76976	22.0806	2.65971	17.1116	2.50198	15.3689	3.49755	17.0471
12.4022	38.8112	4.57543	16.2063	3.99076	19.6004	4.37796	33.6105	3.03737	16.2978	6.22059	21.2399	6.93828	22.9155	2.99652	17.9622	2.499	16.1802	3.83375	17.9009
12.572	39.578	4.91463	16.9602	4.15673	20.4248	4.54678	34.4399	3.20573	17.1615	6.55776	22.0474	7.10677	23.7574	2.99316	18.797	2.66592	17.0511	4.16992	18.7633
12.5713	40.4793	5.25352	17.8037	4.32268	21.2562	4.54537	35.3047	3.37434	17.9515	6.55448	22.9213	7.44575	24.4886	2.98949	19.7235	2.83338	17.7647	4.33585	19.664
12.911	41.3272	5.42218	18.6855	4.65881	22.0651	4.71415	36.1457	3.37243	18.8614	6.8916	23.743	7.61389	25.4331	3.1563	20.5435	3.00025	18.6513	4.50234	20.402
13.0807	42.1087	5.42088	19.5216	4.82471	22.9108	4.71304	36.9244	3.54099	19.6664	7.05849	24.6015	7.78261	26.2068	3.49329	21.3409	2.99716	19.4917	4.83872	21.2023
13.0799	43.0267	5.93018	20.2757	4.99058	23.7636	5.05199	37.7465	3.70952	20.4784	7.39556	25.4374	8.12122	27.0468	3.49012	22.1181	3.16427	20.3096	5.00457	22.1265
13.4199	43.7884	5.92884	21.126	4.98652	24.5639	5.05051	38.6338	3.70782	21.3273	7.56271	26.2196	8.2896	27.9237	3.65686	22.9587	3.33135	21.1345	5.00078	22.9134
13.7595	44.658	6.43751	22.0667	4.98245	25.3701	5.04934	39.4272	4.04652	22.1239	7.72952	27.0988	8.28805	28.7457	3.65335	23.8362	3.66832	22.0235	5.33709	23.735
13.759	45.4885	6.77653	22.8733	5.14825	26.2428	5.04816	40.2253	4.04477	22.987	7.89663	27.8931	8.45669	29.5438	3.99025	24.6614	3.83564	22.7761	5.50316	24.5935
13.7585	46.3236	6.94562	23.6291	5.31434	27.0314	5.21683	41.0989	4.21321	23.8275	8.06371	28.6932	8.62499	30.4406	4.32742	25.4042	3.83244	23.6522	5.66952	25.3693
13.7579	47.1633	7.11438	24.4789	5.13999	27.8851	5.55568	41.9486	4.38192	24.5871	8.40067	29.5627	8.9638	31.2211	4.15364	26.332	3.99942	24.5056	5.83554	26.2413
14.0978	47.9482	7.28312	25.3359	5.30573	28.7778	5.55445	42.7614	4.55031	25.4411	8.3975	30.4046	9.13206	32.1315	4.32056	27.1166	3.82626	25.3362	5.83165	27.0589
14.0972	48.797	7.62204	26.1703	5.47176	29.5843	5.55285	43.6813	4.71868	26.3023	8.73442	31.2876	9.13073	32.8886	4.48747	27.9071	4.33362	26.1438	6.16784	27.9148
14.2669	49.6207	7.96125	26.9214	5.63777	30.3966	5.55159	44.5038	4.71681	27.2003	9.07163	32.0824	9.12906	33.7458	4.48383	28.8251	4.33032	27.0476	6.50432	28.6852
14.6067	50.4194	8.12992	27.799	5.63355	31.2443	5.89073	45.2716	5.05565	27.9551	8.89819	32.9719	9.29758	34.5791	4.65069	29.6277	4.32731	27.867	6.67026	29.5843
14.7763	51.2522	8.46878	28.654	5.96973	32.0385	5.71922	46.1328	5.22426	28.7455	9.57578	33.719	9.63629	35.3885	4.81753	30.4361	4.32428	28.6923	6.83649	30.3966
14.7753	52.2278	8.63771	29.4534	5.96547	32.8977	5.88812	46.9394	5.22232	29.6634	9.74272	34.5608	9.63456	36.263	4.81414	31.2799	4.66165	29.4639	6.83249	31.2443
14.9452	52.9611	8.80663	30.2585	5.9612	33.7627	6.057	47.7505	5.39089	30.4658	10.0795	35.4765	9.97324	37.0839	5.15084	32.1649	4.82879	30.271	6.99869	32.0681
14.9446	53.8371	8.97521	31.1632	6.12711	34.6039	6.22587	48.5662	5.38922	31.3038	10.0765	36.2617	10.142	37.8416	5.31762	32.9912	4.65517	31.2372	6.99465	32.9274
15.2843	54.6586	9.14408	31.9805	6.293	35.4507	6.22451	49.416	5.72764	32.1822	10.4137	37.0911	10.1402	38.7327	5.3145	33.757	4.99248	32.0268	7.50122	33.7034
15.4542	55.4033	9.31293	32.8036	6.289	36.2347	6.39334	50.2407	5.89647	32.9079	10.2404	37.9156	10.3086	39.6	5.48091	34.6908	5.49998	32.7925	7.66736	34.5446
15.4535	56.2925	9.48145	33.7281	6.62507	37.0629	6.39195	51.0997	6.06496	33.7335	10.5775	38.7559	10.4774	40.3724	5.64796	35.4372	5.49683	33.6529	7.83347	35.3914
15.4528	57.1862	9.99068	34.5041	6.45082	37.8862	6.39055	51.9631	5.89301	34.6242	10.7443	39.6317	10.3053	41.3098	5.64446	36.3156	5.66386	34.4895	7.99956	36.2441
15.6227	57.9423	10.1595	35.3451	6.78685	38.7252	6.72955	52.772	6.06145	35.4612	11.0817	40.3821	10.8144	42.0327	5.81148	37.0715	5.66067	35.3615	7.99576	37.0332
15.622	58.8446	10.3283	36.1919	6.61223	39.6589	6.72811	53.6446	6.22988	36.3041	11.2485	41.2687	10.9828	42.9218	5.97815	37.9312	5.82768	36.2096	8.33203	37.8672
15.962	59.5787	10.6672	37.0148	6.77836	40.4377	6.89724	54.3823	6.39829	37.1527	11.5858	42.0288	11.1514	43.7136	5.80438	38.8558	6.16487	37.0338	8.49807	38.7365
16.3016	60.4304	10.8363	37.7742	7.11467	41.1915	6.89578	55.2634	6.56702	37.9086	11.5823	42.956	10.9796	44.5692	6.31177	39.5674	6.33216	37.7944	8.8343	39.5819
16.3009	61.3458	11.1752	38.608	7.11021	42.1116	6.89467	56.0381	6.73539	38.7681	11.9196	43.7257	11.1479	45.4743	6.47838	40.4437	6.15869	38.7184	8.83043	40.391
16.3004	62.1504	11.0038	39.4364	7.10607	42.9343	7.2336	56.8686	6.56332	39.6927	12.2566	44.6046	11.3165	46.2803	6.64497	41.3258	6.15574	39.5182	8.99676	41.175
16.6404	62.8995	11.5129	40.2515	7.10192	43.7615	7.23209	57.7628	6.90221	40.4337	12.2534	45.4433	11.4851	47.0909	6.81189	42.1114	6.49286	40.3642	9.16272	42.0661
16.2992	63.8864	11.5114	41.1612	7.43818	44.5341	7.40077	58.632	6.90032	41.3395	12.4205	46.2569	11.4835	47.9357	6.80858	42.9312	6.8303	41.1145	9.15846	42.9926
16.6395	64.5263	12.0204	41.9879	7.60421	45.3408	7.39962	59.4222	7.06896	42.1199	12.9275	47.1222	11.4819	48.785	6.97512	43.8293	6.82696	42.0307	9.32473	43.7914
16.8089	65.4326	12.0192	42.8065	7.59966	46.2872	7.56827	60.2999	7.23758	42.9048	12.9243	47.9751	11.6504	49.6093	6.97178	44.6587	7.16437	42.7907	9.49099	44.5947
16.8084	66.2552	12.1878	43.7033	7.76565	47.1036	7.56709	61.0975	7.57605	43.7674	12.9215	48.7251	11.8189	50.4381	7.13864	45.4631	7.16099	43.7177	9.82709	45.478
16.8075	67.1995	12.3567	44.502	7.76142	47.9542	7.73572	61.9838	8.08472	44.6061	13.4285	49.6059	11.9875	51.2715	7.30548	46.2721	7.32816	44.517	9.82311	46.3207
16.8074	67.9108	12.5257	45.3053	7.75754	48.7022	7.90472	62.7594	8.25294	45.5099	13.4256	50.3639	11.9861	52.0304	7.30173	47.2209	7.49531	45.3209	10.1595	47.1086
17.147	68.8041	12.8648	46.0835	7.9235	49.5317	8.07371	63.5384	8.4215	46.3147	13.7628	51.1753	12.1546	52.8723	7.63911	47.9037	7.49224	46.1589	10.3257	47.9308
17.1464	69.6411	13.0333	47.0014	8.25927	50.4445	8.07209	64.4668	8.59004	47.1242	13.9293	52.1305	12.8334	53.74	7.6357	48.7559	7.65936	46.9718	10.1515	48.8167
17.3161	70.4522	13.2022	47.8189	8.25498	51.3133	8.07084	65.2828	8.75857	47.9382	14.2665	52.9517	12.8316	54.6212	7.63227	49.6127	7.82646	47.7893	10.4879	49.6184
17.3156	71.2962	13.5413	48.6114	8.25105	52.0772	8.41001	66.0433	8.92708	48.7567	14.4337	53.6961	13	55.4774	7.79903	50.4445	7.99355	48.6114	10.654	50.4542
17.655	72.2061	13.7097	49.5454	8.24673	52.9545	8.57855	66.9547	8.75516	49.639	14.6006	54.5553	12.9986	56.2561	8.13598	51.2512	8.16062	49.438	10.9904	51.265
17.4846	72.9652	13.8789	50.2692	8.58281	53.7773	8.57727	67.7817	9.09385	50.4371	15.1075	55.472	13.1674	57.0088	8.30272	52.0921	8.49752	50.3475	11.1565	52.11
17.8245	73.7607	14.0474	51.2134	8.23842	54.6118	8.74618	68.5827	9.26231	51.2693	15.2747	56.2283	12.9954	57.9367	8.29922	52.9671	8.49472	51.1049	11.1528	52.8789
17.9941	74.5891	14.3864	52.0247	8.57448	55.4431	8.57467	69.4462	9.26055	52.1357	15.4416	57.1013	12.994	58.7264	8.63613	53.7875	9.0018	51.9952	11.4887	53.8135
18.1637	75.4211	14.7254	52.8406	8.57048	56.226	8.91377	70.2246	9.42936	52.8679	15.7786	57.9492	13.5028	59.5446	8.63261	54.6716	9.33902	52.811	11.4849	54.5905
17.9929	76.3155	14.7243	53.61	8.73629	57.0954	9.08265	71.0361	9.59741	53.8229	15.9458	58.7171	13.3307	60.4855	8.79966	55.4194	9.50601	53.661	11.8212	55.4235
18.1624	77.1545	14.893	54.4639	8.90248	57.8562	9.25111	71.972	9.5956	54.7029	16.1126	59.6031	13.3292	61.2867	8.96631	56.2825	9.50278	54.5451	12.1575	56.2611
18.332	77.9969	15.232	55.2929	9.06827	58.7341	9.41996	72.7909	9.93457	55.4175	16.1092	60.5232	13.4979	62.0618	9.13295	57.1502	9.67012	55.2929	11.9834	57.0791
18.502	78.7176	15.2305	56.1856	9.23404	59.6166	9.4186	73.6428	10.1029	56.2765	16.6167	61.2435	13.6667	62.8404	9.29958	58.0224	9.66686	56.1856	12.1495	57.9548
18.6715	79.5665	15.5694	57.0237	9.22998	60.4184	9.41764	74.3758	10.2713	57.1401	16.9537	62.1131	13.6647	63.7683	9.29637	58.8152	10.004	57.0237	12.4861	58.6916
18.8411	80.4189	15.7385	57.783	9.39611	61.1942	9.58646	75.2047	10.2698	57.9253	17.1208	62.8999	13.8334	64.5544	9.80338	59.6369	10.1713	57.783	12.4818	59.6054
18.6702	81.3337	16.0774	58.6296	9.39163	62.1187	9.58506	76.0666	10.4382	58.7974	17.2875	63.8076	14.0021	65.344	9.96996	60.5222	10.168	58.6887	12.6482	60.3792
18.8401	82.0659	16.0758	59.5399	9.55774	62.902	9.92407	76.873	10.6065	59.6741	17.4547	64.6019	14.1708	66.1371	9.96671	61.3264	10.3353	59.4554	13.1546	61.2129
19.0096	82.9283	16.0746	60.3402	9.72384	63.6887	9.92264	77.7418	10.6049	60.4707	17.6217	65.3997	13.9986	67.111	9.96344	62.1342	10.3323	60.2552	13.1503	62.1399
19.1791	83.7942	16.0734	61.144	9.71931	64.6258	10.0914	78.5847	10.7732	61.3559	18.1288	66.261	14.1672	67.9116	10.13	63.032	10.329	61.1735	13.3166	62.9251
19.1784	84.693	16.2421	62.0373	9.88539	65.42	10.2602	79.431	10.9419	62.1305	18.1257	67.0957	14.1656	68.7451	10.2969	63.8177	10.4958	62.0668	13.3127	63.7434
19.0079	85.4956	16.5809	62.9056	10.0515	66.2177	10.4289	80.2809	11.2807	62.8791	18.6328	67.9656	14.164	69.5821	10.2936	64.6364	10.4929	62.878	13.6488	64.6238
19.348	86.2125	16.7498	63.6913	10.2175	67.0188	10.5981	81.0079	11.6192	63.7473	18.6296	68.8078	14.3326	70.3932	10.6303	65.5173	10.6601	63.6632	13.8151	65.42
19.3472	87.1208	16.7486	64.51	10.2129	67.9725	10.7668	81.8643	11.6172	64.6791	18.9668	69.5946	14.331	71.2372	10.627	66.3435	10.8269	64.569	13.981	66.3385
19.6869	87.9737	16.9176	65.3027	10.3789	68.7811	10.7653	82.7535	11.7858	65.4687	19.1339	70.4143	14.3294	72.0847	10.7939	67.1436	10.8242	65.2735	14.1473	67.1423
19.6865	88.7579	17.0861	66.2171	10.3747	69.6227	10.7638	83.6463	11.7842	66.2913	19.6413	71.1786	14.6681	72.8767	10.9607	67.9472	11.3315	66.1283	14.1437	67.8592
19.516	89.5742	17.2551	67.0172	10.5407	70.4384	10.9325	84.5131	11.9528	67.0878	19.8079	72.128	14.8367	73.7017	11.1272	68.8742	11.4982	67.0467	14.3095	68.7897
19.8556	90.4366	17.5942	67.7913	10.7067	71.2575	10.9314	85.2841	12.121	68.0066	19.9748	72.9587	14.835	74.5597	11.294	69.6853	11.3249	67.9094	14.646	69.5744
20.0254	91.1996	17.7627	68.7183	11.0425	72.1727	11.2703	86.1279	12.1193	68.8402	20.312	73.7635	15.0035	75.3916	11.2906	70.5294	11.4921	68.7165	14.8122	70.3921
20.0246	92.1273	17.9316	69.5294	11.2089	72.8768	11.2692	86.9045	12.6283	69.5887	20.6492	74.5717	15.0018	76.2566	11.4574	71.3475	11.6592	69.5271	14.978	71.3351
20.1944	92.8958	17.9303	70.3735	11.2046	73.7358	11.4383	87.6542	12.6266	70.4292	20.6459	75.4424	15.1703	77.0955	11.7944	72.1396	11.6561	70.3707	14.9744	72.0674
20.3637	93.8006	18.2693	71.1621	11.5408	74.5395	11.6069	88.5369	12.9649	71.3351	21.1533	76.2282	15.3392	77.8132	12.6416	72.9691	11.8232	71.1883	15.1401	73.0184
20.3629	94.7383	18.4382	71.9838	11.5365	75.4055	11.6053	89.4526	13.1335	72.1536	21.15	77.1059	15.3375	78.6881	12.8084	73.7982	11.8201	72.0389	15.4769	73.6978
20.5327	95.5154	18.6066	72.9312	11.7024	76.2456	11.6042	90.2403	13.302	72.9756	21.6573	77.8987	15.3358	79.5665	12.8049	74.6603	11.9872	72.8634	15.6431	74.5329
20.362	96.3538	18.7759	73.6374	11.8683	77.0892	11.7728	91.133	13.4704	73.801	21.8242	78.7539	15.334	80.4484	13.4823	75.4079	11.984	73.721	15.8088	75.4959
20.3616	97.1654	18.9447	74.4695	11.6942	77.8697	11.9419	91.8968	13.4691	74.5366	21.9911	79.6126	15.6731	81.1481	13.4788	76.277	12.1511	74.5525	15.9754	76.2137
20.3612	97.9796	19.1135	75.3051	12.0303	78.6903	12.2806	92.7666	13.8074	75.4625	22.3282	80.4454	15.6713	82.0365	13.6456	77.12	12.3181	75.3876	16.1415	77.0594
20.7007	98.874	19.1121	76.1736	12.026	79.5734	12.2795	93.5654	13.8056	76.3279	22.8355	81.2522	15.6695	82.9283	13.8123	77.9666	12.315	76.2556	16.3076	77.9085
20.8709	99.5275	19.4511	76.9867	12.1918	80.4304	12.448	94.4711	13.9741	77.1673	23.0023	82.1214	15.838	83.7942	13.8088	78.8461	12.6522	77.0682	16.4737	78.7611
20.8699	100.487	19.6199	77.8328	12.3577	81.2909	12.4468	95.2754	14.1429	77.8855	23.1696	82.865	15.8366	84.5644	13.9755	79.6996	12.6494	77.8179	16.6402	79.4905
20.8695	101.311	19.9589	78.6529	12.3533	82.1844	12.786	96.0234	14.1407	78.8862	23.3364	83.7407	16.1752	85.4073	14.1426	80.4298	13.1564	78.7333	16.9765	80.3202
21.0392	102.109	19.9574	79.5353	12.5196	82.9236	12.7843	96.968	14.3095	79.6103	23.6734	84.5904	16.344	86.1536	14.4794	81.2604	13.1536	79.489	17.1421	81.3105
21.0387	102.939	20.2963	80.3624	12.5156	83.6947	12.6129	97.8098	14.4779	80.4632	24.1807	85.4143	16.5124	87.0325	14.4759	82.1534	12.9802	80.4034	17.1384	82.0783
21.0377	103.911	20.4651	81.2225	12.6814	84.5682	12.9521	98.566	14.8165	81.2901	24.3474	86.3004	16.5105	87.9442	14.6425	83.0204	13.3173	81.233	17.3044	82.9479
21.2079	104.578	20.6342	81.9582	12.8472	85.4452	12.9508	99.3836	14.9849	82.15	24.5147	87.0586	16.5091	88.7285	14.9794	83.8615	13.3145	81.9973	17.4704	83.821
21.3775	105.386	20.8029	82.8247	13.0134	86.1955	13.4602	100.116	14.9835	82.9151	25.0219	87.8925	16.6779	89.486	14.9762	84.6356	13.4819	82.7347	17.8071	84.5385
21.5467	106.337	20.9716	83.6947	13.1792	87.079	13.6287	101.046	15.1518	83.7815	25.3588	88.7592	16.676	90.4072	15.313	85.4832	13.8186	83.7023	17.9731	85.4181
21.376	107.21	21.1408	84.439	13.3449	87.966	13.6274	101.872	15.15	84.6808	25.3558	89.5554	16.6745	91.1996	15.4796	86.3637	13.986	84.4457	18.3093	86.2718
21.7159	107.997	21.3094	85.3155	13.3409	88.7542	13.6261	102.7	15.4885	85.5247	25.863	90.3992	16.8428	92.0979	15.6467	87.117	14.1529	85.3212	18.3055	87.0567
21.7153	108.845	21.4781	86.1955	13.3369	89.545	13.795	103.502	15.827	86.3722	26.0302	91.1715	17.0111	92.9997	15.9834	87.9745	14.3198	86.2001	18.4715	87.9462
21.7147	109.696	22.3276	86.9613	13.5026	90.4415	13.9634	104.445	15.6554	87.1812	26.1969	92.0807	17.0096	93.8006	16.4904	88.8062	14.4866	87.0826	18.6379	88.7073
22.0546	110.491	22.4962	87.8483	13.6688	91.2085	13.7919	105.31	15.8241	87.9339	26.704	92.9346	17.0082	94.6041	16.4872	89.5974	14.654	87.8375	18.8038	89.6033
21.7136	111.406	22.6653	88.6072	13.8345	92.1114	13.9608	106.12	16.1626	88.7909	26.8711	93.7154	17.1769	95.3808	16.6538	90.4944	14.8213	88.5951	19.3106	90.3112
22.0539	112.062	22.8339	89.5007	13.8304	92.9133	14.1297	106.932	16.1606	89.7101	27.0378	94.6346	17.3451	96.2951	16.6505	91.2912	14.9881	89.487	19.3063	91.2431
21.8831	112.952	23.0029	90.2651	13.9966	93.6884	14.2986	107.747	16.4995	90.442	27.5454	95.3623	17.3436	97.1067	16.9873	92.1653	15.155	90.3824	19.4723	92.1491
22.3931	113.728	23.0013	91.1944	14.3324	94.5714	14.6376	108.535	16.6678	91.3383	27.8822	96.2585	17.5123	97.8915	17.3244	92.9089	15.3222	91.1485	19.6386	92.9243
22.5627	114.564	23.1704	91.9644	14.3283	95.3815	14.806	109.496	16.8365	92.1052	28.3893	97.129	17.5108	98.7082	17.8314	93.76	15.1491	91.976	19.805	93.7021
22.3918	115.462	23.5092	92.8415	14.494	96.3004	14.6349	110.235	17.1749	92.9786	28.5564	97.924	17.679	99.635	17.6574	94.7323	15.3164	92.7472	19.9708	94.6176
22.5614	116.304	23.6777	93.7514	14.6601	97.0866	14.8033	111.203	17.1734	93.7804	28.7235	98.7215	17.6779	100.32	17.9946	95.4844	15.4832	93.6551	20.1372	95.4009
22.3906	117.206	23.6765	94.5594	14.4858	97.9341	15.1428	111.859	17.5118	94.6603	29.0608	99.4923	18.0163	101.223	18.3317	96.2391	15.4797	94.5958	20.3035	96.1868
22.5601	118.053	24.0157	95.3111	14.6518	98.7255	15.1414	112.718	17.5102	95.4677	29.738	100.346	18.1844	102.16	18.3279	97.1915	15.647	95.3756	20.4693	97.1118
22.7301	118.756	24.0145	96.1241	14.8179	99.5194	15.3097	113.695	17.6789	96.2482	30.0748	101.262	18.0131	102.881	18.3246	98.0105	15.8142	96.158	20.8058	97.8739
22.8997	119.607	24.0128	97.0759	15.1537	100.424	15.3088	114.415	17.847	97.167	30.2419	102.07	18.1817	103.684	18.6617	98.7734	15.9814	96.9429	20.8019	98.6973
23.0692	120.462	24.5222	97.8064	14.9794	101.283	15.6478	115.224	18.1859	97.9237	30.4089	102.882	18.3499	104.629	18.9988	99.5388	15.9784	97.7597	21.138	99.6024
22.8983	121.377	24.6907	98.7353	15.1454	102.085	15.8166	116.064	18.354	98.849	30.7462	103.666	18.3483	105.467	19.1653	100.474	15.9749	98.7159	21.3047	100.264
23.0683	122.088	24.8596	99.5302	15.1412	102.919	15.6449	116.966	18.6928	99.6113	31.0829	104.595	18.5169	106.279	19.1619	101.304	15.9719	99.5383	21.2998	101.372
23.0676	122.978	24.8584	100.357	14.9668	103.784	15.8137	117.811	18.6912	100.435	31.2499	105.414	18.5153	107.122	19.1586	102.136	16.1391	100.334	21.4666	102.038
23.0669	123.871	24.8571	101.186	15.4733	104.536	15.9825	118.659	18.8598	101.232	31.5872	106.207	18.6838	107.938	19.3254	102.942	16.3062	101.132	21.4626	102.875
23.4066	124.709	24.8558	102.018	15.4691	105.377	16.1517	119.363	19.0279	102.169	31.9244	107.002	19.0226	108.728	19.322	103.779	16.3032	101.962	21.6288	103.685
23.5766	125.428	25.1949	102.794	15.4649	106.221	16.1502	120.245	19.0263	103.001	32.0909	107.972	19.1912	109.549	19.4884	104.73	16.4704	102.765	21.9653	104.468
23.4057	126.357	25.3634	103.741	15.4607	107.068	16.4892	121.071	19.365	103.777	32.4281	108.773	19.1895	110.403	19.8259	105.374	16.8072	103.681	21.9608	105.453
23.7458	127.051	25.7025	104.522	15.6266	107.888	16.6579	121.929	19.5331	104.724	32.5951	109.606	19.358	111.23	19.822	106.36	16.9744	104.49	22.2972	106.242
23.7451	127.956	25.7011	105.365	15.6224	108.74	16.6564	122.819	19.7021	105.394	33.1024	110.382	19.5266	112.059	20.6692	107.203	17.1415	105.302	22.4634	107.062
23.7443	128.864	25.6998	106.21	15.6182	109.595	16.6554	123.562	19.7	106.377	33.2694	111.22	19.8653	112.862	20.6658	108.054	17.1384	106.145	22.4594	107.915
23.7441	129.622	26.0389	106.999	15.7841	110.422	16.9943	124.398	19.8685	107.193	33.4363	112.061	20.0338	113.696	20.8326	108.878	17.4757	106.932	22.7958	108.711
24.0837	130.476	26.7184	107.732	15.9501	111.252	16.9928	125.295	20.3774	107.952	33.6033	112.904	20.2023	114.533	20.9998	109.562	17.4726	107.781	22.7918	109.569
24.0829	131.391	26.8868	108.698	16.116	112.085	16.9918	126.044	20.5459	108.773	34.1106	113.691	20.2006	115.402	21.1661	110.535	17.4695	108.632	23.1282	110.37
24.0826	132.156	27.2258	109.495	16.1122	112.806	17.1605	126.917	20.714	109.739	34.1073	114.568	20.3691	116.244	21.6733	111.308	17.6366	109.456	23.2943	111.204
24.252	133.046	27.3946	110.324	16.1075	113.817	17.3291	127.792	20.8824	110.565	34.4445	115.39	20.1972	117.147	21.8401	112.143	17.9738	110.254	23.2903	112.069
24.2518	133.815	27.5635	111.156	16.2739	114.513	17.4978	128.669	21.2211	111.365	34.7816	116.214	20.5364	117.819	21.8371	112.865	17.9702	111.256	23.6266	112.878
24.4211	134.71	27.5621	112.019	16.2696	115.385	17.6669	129.398	21.3901	112.052	34.9485	117.069	20.5346	118.698	22.1735	113.82	18.3075	112.059	23.7927	113.719
24.4208	135.482	27.9011	112.827	16.4355	116.23	17.8356	130.28	21.7282	113.001	35.1153	117.928	20.7031	119.55	22.5105	114.633	18.3043	112.923	23.9589	114.563
24.5907	136.227	27.8997	113.695	16.6014	117.078	18.0047	131.012	21.8967	113.837	35.4524	118.76	20.7013	120.433	22.3373	115.39	18.3016	113.645	24.4654	115.351
24.7601	137.129	28.0685	114.537	16.5975	117.811	18.0031	131.929	22.0651	114.677	35.6193	119.623	20.8698	121.29	22.504	116.237	18.4687	114.485	24.4613	116.229
24.5896	137.936	28.067	115.411	16.9331	118.781	18.342	132.789	22.2341	115.373	35.9564	120.46	21.0387	122.002	22.6707	117.087	18.4655	115.356	24.4572	117.109
24.5887	138.872	28.2363	116.112	16.9293	119.518	18.5106	133.681	22.4025	116.217	36.1237	121.179	21.2071	122.864	23.0076	117.91	18.8027	116.172	24.6233	117.963
24.9288	139.595	28.2349	116.99	16.9249	120.405	18.6797	134.422	22.5709	117.063	36.4608	122.021	20.8649	123.816	23.3445	118.735	18.7995	117.049	24.7894	118.82
24.9279	140.536	28.5739	117.813	17.0908	121.265	18.6786	135.193	22.9095	117.883	36.4574	122.923	21.0338	124.533	23.3409	119.622	18.9665	117.898	24.9559	119.531
24.9276	141.322	28.5724	118.696	17.2566	122.128	18.677	136.121	22.9077	118.764	36.9647	123.741	21.032	125.431	23.6778	120.453	18.9638	118.633	25.122	120.392
24.9272	142.109	28.7416	119.405	17.2527	122.873	18.6759	136.897	23.0756	119.766	36.7916	124.526	21.2009	126.153	23.8445	121.315	19.1307	119.488	25.2881	121.256
25.0971	142.869	28.9104	120.264	17.4185	123.741	18.8444	137.8	23.4147	120.446	37.1286	125.378	21.5395	126.997	24.1813	122.151	19.1275	120.374	25.4541	122.122
25.2664	143.79	29.0791	121.126	17.5844	124.611	19.013	138.707	23.5831	121.305	37.4656	126.232	21.5377	127.903	24.0081	122.927	19.295	121.086	25.6207	122.841
25.2655	144.742	29.2478	121.99	17.5805	125.362	19.1821	139.459	23.9216	122.138	37.6324	127.118	21.5364	128.659	24.3449	123.768	19.2917	121.977	25.7867	123.712
25.6055	145.479	29.5867	122.827	17.9165	126.208	19.1809	140.242	23.9198	123.031	37.7992	128.006	21.8749	129.511	24.5115	124.64	19.6289	122.812	25.7825	124.615
25.6051	146.276	29.5852	123.726	17.9121	127.115	19.3495	141.155	24.0881	123.898	37.7963	128.773	22.0433	130.395	24.8484	125.486	19.7958	123.679	26.1192	125.311
25.4345	147.104	29.7544	124.447	18.0784	127.843	19.3483	141.943	24.257	124.618	38.1332	129.637	22.0414	131.31	25.015	126.363	19.6228	124.457	26.2852	126.189
25.6038	148.036	29.9231	125.321	18.0739	128.754	19.3472	142.731	24.2551	125.519	38.3005	130.378	22.0401	132.075	25.1821	127.091	19.7898	125.329	26.4512	127.07
25.6034	148.839	30.0918	126.198	18.07	129.515	19.6859	143.622	24.5942	126.213	38.4673	131.276	22.0382	132.995	25.3487	127.974	19.7864	126.233	26.447	127.983
25.7732	149.614	30.2604	127.077	18.2357	130.402	19.8549	144.386	24.7625	127.09	38.8048	131.992	22.207	133.735	25.6855	128.829	19.9539	126.958	26.7837	128.687
25.943	150.392	30.2594	127.836	18.4015	131.291	19.8538	145.181	25.101	127.939	38.9715	132.895	22.2051	134.66	25.6824	129.593	20.291	127.808	26.9497	129.575
25.942	151.362	30.7685	128.661	18.3975	132.059	19.852	146.137	25.2693	128.821	39.1382	133.8	22.2037	135.432	26.0191	130.453	20.4579	128.69	26.946	130.342
26.1118	152.143	30.5972	129.453	18.7335	132.924	20.1907	147.037	25.4381	129.553	39.1353	134.58	22.5428	136.148	26.1857	131.345	20.455	129.451	27.1119	131.235
25.9411	152.984	31.1062	130.284	18.8997	133.666	20.3598	147.808	25.7766	130.41	39.6424	135.432	22.5408	137.08	26.5224	132.21	20.6219	130.337	27.1077	132.159
26.1109	153.769	31.1047	131.204	18.725	134.623	20.3586	148.611	25.9449	131.299	39.8096	136.187	22.7096	137.829	26.5193	132.982	20.7888	131.226	27.4444	132.873
26.2806	154.556	31.2738	131.944	18.8913	135.369	20.6978	149.357	26.1131	132.19	39.9763	137.102	22.5375	138.794	26.6864	133.726	21.1264	131.934	27.4401	133.803
26.62	155.478	31.4424	132.839	19.057	136.272	20.8662	150.295	26.6218	133.026	39.8031	137.919	22.5361	139.577	27.0226	134.754	20.9528	132.886	27.6065	134.55
26.4494	156.327	31.4413	133.612	19.2232	137.022	20.865	151.103	26.7906	133.768	40.14	138.809	22.8745	140.459	27.1896	135.503	21.46	133.724	27.9427	135.426
26.6191	157.119	31.6099	134.513	19.2187	137.96	20.8638	151.913	26.9588	134.666	40.137	139.602	23.0433	141.216	27.3567	136.253	21.4572	134.497	28.1086	136.333
26.4484	157.972	31.6088	135.29	19.3849	138.714	21.203	152.667	27.1276	135.412	40.4744	140.338	23.0414	142.162	27.5232	137.162	21.2836	135.457	28.275	137.087
26.7884	158.738	32.1178	136.136	19.5506	139.626	21.3714	153.614	27.466	136.287	40.8113	141.234	23.2101	142.923	27.6902	137.916	21.6211	136.175	28.6116	137.813
26.6177	159.594	32.1167	136.917	19.5465	140.413	21.3701	154.43	27.6347	137.037	40.9779	142.163	23.2087	143.715	28.0269	138.8	21.6183	136.954	28.7775	138.727
26.7874	160.394	32.2853	137.827	19.8829	141.144	21.5391	155.218	27.8029	137.945	40.9749	142.963	23.3769	144.638	28.1933	139.716	21.6149	137.891	28.7737	139.515
26.7869	161.224	32.624	138.71	20.0486	142.064	21.7081	156.008	27.9712	138.856	41.3123	143.707	23.3754	145.434	28.1901	140.506	21.9524	138.615	29.1098	140.405
26.956	162.193	32.7931	139.468	19.8743	142.885	22.0466	156.936	28.3101	139.582	41.3093	144.511	23.7144	146.173	28.697	141.368	21.7793	139.429	28.9358	141.226
27.2959	162.969	32.792	140.257	20.0405	143.651	22.0454	157.759	28.4788	140.34	41.6461	145.419	23.8826	147.104	29.0342	142.104	21.9461	140.343	29.2718	142.121
26.955	163.864	33.1307	141.147	20.0359	144.606	22.2143	158.555	28.647	141.258	41.8133	146.198	24.2215	147.847	29.031	142.899	22.1134	141.103	29.268	142.917
27.1247	164.672	33.2992	142.069	20.2021	145.376	22.213	159.381	28.6449	142.207	41.8096	147.169	24.3897	148.782	29.3677	143.797	22.2801	142.022	29.6046	143.656
27.1241	165.512	33.4683	142.834	20.3677	146.307	22.382	160.181	28.9838	142.942	42.147	147.923	24.3882	149.587	29.3644	144.597	22.4474	142.785	29.7704	144.587
27.464	166.295	33.807	143.732	20.5338	147.08	22.3801	161.177	29.3227	143.678	42.1439	148.736	24.3867	150.394	29.701	145.5	22.7844	143.68	29.5964	145.418
27.2933	167.167	33.8058	144.53	20.7	147.855	22.7192	161.952	29.6611	144.576	42.1409	149.551	24.5554	151.174	29.6978	146.303	22.7814	144.476	29.9324	146.324
27.4629	167.983	33.6344	145.36	20.6959	148.661	22.8881	162.757	29.8292	145.506	42.4782	150.31	24.7235	152.118	30.3748	147.152	22.9482	145.405	30.269	147.072
27.6326	168.801	33.9736	146.103	20.6913	149.63	22.8868	163.593	29.9979	146.277	42.4746	151.293	24.722	152.931	30.5418	147.93	22.775	146.234	30.2651	147.879
27.632	169.649	33.9719	147.068	20.8574	150.411	23.0557	164.401	29.9958	147.241	42.8119	152.055	24.8907	153.716	30.8784	148.843	22.9423	147.007	30.4315	148.659
27.9719	170.441	34.1409	147.845	20.6831	151.252	23.0544	165.241	30.3347	147.987	42.979	152.849	25.0588	154.667	31.2155	149.596	23.1095	147.782	30.427	149.633
27.8011	171.322	34.3099	148.624	21.0188	152.17	23.2233	166.053	30.3331	148.794	43.1461	153.644	25.0573	155.486	31.3819	150.542	23.106	148.748	30.7636	150.387
27.8005	172.176	34.3087	149.433	21.0153	152.822	23.3921	166.867	30.672	149.544	43.3126	154.607	25.2259	156.277	31.5488	151.328	23.103	149.556	30.9299	151.173
28.1403	172.973	34.3075	150.244	21.351	153.744	23.3908	167.712	30.6699	150.517	43.6499	155.377	25.2244	157.099	31.8859	152.087	23.4405	150.307	31.0962	151.961
27.9696	173.86	34.4759	151.191	21.3469	154.563	23.5596	168.53	30.8385	151.3	43.6462	156.373	25.2228	157.923	31.7124	152.934	23.6077	151.089	31.2619	152.914
28.1397	174.518	34.6449	151.977	21.6832	155.326	23.7279	169.519	31.0071	152.085	43.9841	156.981	25.2213	158.749	32.0495	153.696	23.6042	152.065	31.4282	153.706
28.3088	175.522	34.6437	152.794	21.6785	156.313	23.3867	170.257	31.0055	152.901	43.9809	157.815	25.5601	159.518	32.2159	154.654	24.1118	152.793	31.4243	154.528
28.3087	176.212	34.9823	153.719	21.6749	156.973	23.896	171.022	31.1741	153.689	44.1474	158.788	25.5585	160.347	32.3827	155.449	24.2784	153.744	31.7603	155.459
28.3081	177.076	34.9816	154.375	21.6702	157.964	23.8946	171.876	31.3422	154.643	44.4847	159.568	25.7266	161.316	32.5496	156.246	23.9356	154.457	31.9266	156.256
28.3075	177.942	35.15	155.333	21.8363	158.764	24.5735	172.787	31.681	155.407	44.6517	160.378	25.8952	162.12	33.0564	157.152	24.2724	155.384	32.0928	157.056
28.3069	178.809	35.1488	156.158	21.8321	159.594	24.4025	173.502	32.0192	156.337	44.648	161.388	26.0638	162.926	33.2232	157.953	24.4396	156.178	32.2591	157.856
28.6467	179.621	35.4873	157.091	21.9982	160.396	24.5707	174.504	32.358	157.104	44.6454	162.062	26.0622	163.762	33.3901	158.755	24.4366	157.002	32.0849	158.717
28.646	180.492	35.4866	157.754	22.3344	161.172	24.3997	175.222	32.6962	158.039	44.8124	162.878	26.4011	164.543	33.3862	159.756	24.6037	157.799	32.2512	159.522
28.646	181.19	35.4848	158.75	22.3302	162.007	24.5685	176.056	32.6952	158.702	45.1497	163.666	26.3994	165.383	33.5536	160.395	24.9411	158.569	32.5877	160.299
28.8149	182.211	35.6543	159.386	22.4957	162.983	24.5671	176.92	32.693	159.699	45.1465	164.515	26.568	166.196	33.7199	161.371	24.7673	159.594	32.5831	161.303
28.8149	182.912	35.8226	160.357	22.4921	163.655	24.9061	177.728	32.8615	160.503	45.4831	165.477	26.9068	166.982	33.8867	162.181	24.935	160.23	32.9196	162.084
28.9844	183.761	36.1618	161.135	22.6575	164.635	25.0749	178.567	33.2003	161.28	45.4805	166.158	27.0748	167.968	33.8839	162.853	25.1016	161.201	33.0858	162.896
28.9838	184.64	36.1604	161.972	22.8235	165.448	25.0734	179.437	34.0491	162.139	45.6475	166.983	27.2434	168.786	34.2203	163.806	24.9283	162.066	33.0818	163.739
28.9831	185.522	35.9889	162.84	22.8199	166.124	25.2422	180.28	34.3879	162.919	45.8139	167.981	27.412	169.607	34.0468	164.68	25.2657	162.845	33.2481	164.554
29.1532	186.199	36.328	163.623	23.1555	167.081	25.411	181.124	34.5564	163.731	45.8113	168.667	27.4103	170.458	34.3838	165.468	25.4328	163.655	33.4143	165.372
29.1525	187.084	36.4969	164.437	22.9811	167.959	25.4095	181.999	34.3845	164.602	46.1479	169.64	27.5789	171.282	34.7208	166.258	25.4297	164.495	33.4103	166.22
29.1518	187.971	36.4956	165.281	22.9768	168.809	25.4087	182.701	34.7233	165.388	46.3149	170.472	27.7474	172.108	34.7174	167.108	25.4266	165.338	33.5765	167.041
28.9809	188.888	36.6645	166.098	23.313	169.603	25.5774	183.55	34.721	166.403	46.3122	171.162	27.7457	172.965	35.0544	167.902	25.5937	166.153	33.7427	167.863
29.3212	189.542	36.8328	167.087	23.479	170.427	26.0866	184.343	34.8901	167.052	46.6494	171.968	27.9143	173.794	35.051	168.755	25.7608	166.97	34.0791	168.659
29.3205	190.433	37.0022	167.738	23.4748	171.282	25.7447	185.283	35.0586	167.873	46.8158	172.979	27.9126	174.654	35.0475	169.61	25.9279	167.789	34.2447	169.656
29.49	191.298	37.1711	168.56	23.6407	172.111	25.9135	186.138	35.2265	168.865	46.9833	173.644	28.0817	175.315	35.5547	170.38	25.9248	168.639	34.4109	170.484
29.4893	192.193	37.1691	169.585	23.4668	172.827	26.2524	186.965	35.395	169.689	47.1497	174.659	28.4204	176.12	35.5507	171.411	26.0919	169.461	34.577	171.314
29.4892	192.91	37.3385	170.24	23.803	173.629	26.4211	187.824	35.5635	170.515	47.3166	175.502	28.2485	177.015	35.718	172.07	25.9186	170.343	34.7438	171.974
29.6587	193.779	37.5074	171.068	23.6279	174.693	26.4202	188.535	35.7319	171.343	47.3139	176.201	28.2468	177.882	35.7146	172.933	26.2559	171.14	34.9099	172.807
29.6579	194.679	37.6756	172.069	23.9646	175.326	26.4187	189.425	36.0706	172.144	47.651	177.018	28.4153	178.721	35.8813	173.768	26.2527	171.997	35.0761	173.642
29.828	195.372	37.8445	172.901	23.9604	176.192	26.5874	190.289	36.0689	173.004	47.6478	177.895	28.4136	179.592	35.8779	174.634	26.4198	172.827	35.2422	174.479
29.9975	196.246	37.8431	173.764	24.1263	177.03	26.7567	190.975	36.4076	173.808	47.8147	178.744	28.5821	180.435	36.0446	175.473	26.5868	173.658	35.2382	175.347
29.8265	197.18	38.0125	174.426	24.122	177.899	26.9248	192.021	36.7462	174.614	47.9816	179.596	28.581	181.134	36.2114	176.313	26.7539	174.491	35.2341	176.217
30.1662	198.029	38.0111	175.292	24.4581	178.712	26.9239	192.739	37.0849	175.422	48.3187	180.42	28.7488	182.156	36.5483	177.126	26.7507	175.355	35.4002	177.059
30.166	198.756	38.1799	176.131	24.624	179.556	27.0926	193.609	37.0831	176.29	48.3154	181.304	28.7477	182.858	36.5454	177.825	26.9178	176.192	35.7366	177.874
30.1653	199.666	38.1785	177	24.6197	180.431	27.4321	194.271	37.0814	177.159	48.4829	181.984	28.746	183.737	36.8817	178.816	27.0848	177.03	35.9027	178.72
29.9949	200.424	38.3473	177.842	24.616	181.132	27.2603	195.202	37.42	177.972	48.6498	182.842	28.9144	184.589	36.8782	179.693	27.2518	177.87	36.0688	179.567
30.3345	201.279	38.516	178.686	24.9521	181.952	27.5992	196.049	37.4182	178.845	48.6464	183.731	28.9126	185.472	37.2151	180.513	27.2492	178.567	36.4051	180.388
30.1635	202.223	38.6848	179.532	24.9477	182.831	27.5977	196.954	37.417	179.545	48.8133	184.593	28.9115	186.179	37.3818	181.364	27.246	179.44	36.401	181.268
30.5038	202.899	38.6834	180.408	25.1136	183.684	27.7669	197.651	37.7556	180.363	49.1504	185.427	29.0799	187.036	37.7187	182.188	27.4131	180.285	36.5671	182.121
30.503	203.817	38.8527	181.082	25.1093	184.567	27.9356	198.532	37.9235	181.388	49.3179	186.114	29.2484	187.895	37.8854	183.043	27.5801	181.132	36.7332	182.976
30.673	204.524	39.0215	181.933	25.1049	185.452	28.2744	199.384	37.9222	182.091	49.4847	186.98	29.4168	188.755	37.8825	183.751	27.7471	181.981	36.7296	183.684
30.6722	205.445	39.1903	182.785	25.441	186.281	28.1027	200.326	38.0906	182.944	49.6516	187.849	29.415	189.647	38.2194	184.58	28.0843	182.802	36.8957	184.542
30.6714	206.369	39.359	183.639	25.4372	186.991	28.2719	201.028	38.259	183.798	49.8184	188.719	29.7542	190.303	38.2158	185.469	28.081	183.684	36.8916	185.431
30.8414	207.079	39.3575	184.524	25.6031	187.852	28.4405	201.915	38.4274	184.654	49.815	189.62	29.7524	191.197	38.5527	186.302	28.248	184.538	37.2278	186.263
30.8406	208.006	39.3561	185.411	25.5987	188.744	28.4389	202.833	38.5958	185.512	49.9825	190.314	29.7506	192.094	38.7194	187.165	28.2454	185.246	36.8839	187.035
31.0106	208.719	39.5254	186.093	25.9348	189.579	28.9486	203.481	38.594	186.401	50.1493	191.189	29.919	192.963	38.7164	187.88	28.4123	186.103	37.3904	187.842
31.0098	209.649	39.6941	186.954	26.1012	190.267	28.7768	204.431	38.7629	187.084	50.3162	192.066	29.9178	193.682	38.883	188.747	28.4091	186.991	37.3862	188.737
31.1791	210.551	39.8629	187.817	26.0968	191.163	29.1156	205.296	38.9313	187.947	50.3128	192.974	29.916	194.584	38.8795	189.644	28.7463	187.823	37.5522	189.606
31.1789	211.298	39.8614	188.711	26.4328	192.004	29.1146	206.035	39.4401	188.754	50.4802	193.673	30.0844	195.458	39.2163	190.485	28.743	188.715	37.8891	190.267
31.0078	212.261	40.0307	189.398	26.2582	192.933	29.2826	207.117	39.268	189.678	50.647	194.555	30.423	196.304	39.383	191.357	28.9106	189.401	37.8849	191.167
31.0076	213.01	40.0292	190.295	26.2538	193.835	29.4524	207.645	39.437	190.366	50.8138	195.439	30.4218	197.03	39.38	192.079	28.7371	190.325	37.8807	192.07
31.3478	213.703	40.1979	191.164	26.4202	194.529	29.4508	208.574	39.6053	191.236	51.1514	196.113	30.7603	197.88	39.3764	192.983	28.904	191.192	38.0468	192.945
31.3469	214.642	40.707	191.978	26.586	195.405	29.6194	209.476	39.9438	192.079	51.3176	197.183	30.7585	198.789	39.543	193.86	29.0709	192.062	38.0426	193.851
31.3467	215.394	40.7054	192.88	26.7524	196.102	29.4481	210.251	39.7717	193.01	51.6552	197.86	30.9269	199.672	39.8804	194.528	29.2385	192.753	38.3794	194.519
31.516	216.308	40.7039	193.784	26.9182	196.982	29.6173	210.969	39.9407	193.704	51.4816	198.808	31.0958	200.374	40.047	195.408	29.065	193.684	38.5454	195.399
31.686	217.034	40.8732	194.48	26.7436	197.921	29.9561	211.847	39.9388	194.609	51.8192	199.488	31.0939	201.288	40.2136	196.29	29.4021	194.529	38.8816	196.252
31.6851	217.98	40.8717	195.387	27.0796	198.775	30.1247	212.755	40.2773	195.458	51.8157	200.41	31.4331	201.964	40.21	197.203	29.3994	195.253	39.0482	196.953
31.6848	218.738	40.8707	196.114	27.0757	199.506	30.123	213.694	40.4462	196.156	51.8129	201.15	31.6014	202.853	40.3772	197.905	29.5663	196.131	39.0434	198.05
31.8542	219.658	41.0394	196.995	27.2415	200.392	30.2922	214.417	40.6139	197.22	52.1499	202.018	31.4294	203.801	40.5438	198.792	29.563	197.039	39.21	198.754
31.8539	220.418	41.3783	197.849	27.4073	201.28	30.1209	215.2	40.7828	197.921	52.3166	202.917	31.5977	204.694	40.5401	199.71	29.7305	197.739	39.3766	199.459
31.8536	221.18	41.5475	198.552	27.4034	202.015	30.2895	216.115	40.7809	198.835	52.4834	203.818	31.9368	205.375	40.8775	200.388	29.8974	198.621	39.5425	200.349
32.0229	222.104	41.5459	199.467	27.399	202.935	30.4586	216.842	40.9498	199.539	52.4805	204.563	31.9349	206.299	41.0441	201.279	30.0643	199.506	39.7085	201.241
31.8518	223.088	41.5444	200.384	27.5653	203.644	30.4569	217.789	41.1181	200.427	52.8175	205.438	32.1039	207.012	41.0404	202.202	30.2311	200.392	39.7042	202.164
32.0217	223.825	41.7136	201.09	27.731	204.538	30.6261	218.518	41.2863	201.317	52.9848	206.157	32.2722	207.911	41.2076	202.913	30.2284	201.126	39.8708	202.874
32.3618	224.534	41.8822	201.982	27.7266	205.464	30.7946	219.44	41.9652	202.122	52.9813	207.093	32.4404	208.811	41.3741	203.81	30.2251	202.044	39.8665	203.8
32.1913	225.33	42.0509	202.875	27.8929	206.176	30.9638	220.172	42.1335	203.015	53.3183	207.973	32.6094	209.528	41.5407	204.708	30.5621	202.906	40.2033	204.484
32.1904	226.292	41.8797	203.643	28.0586	207.076	31.6429	221.01	42.6428	203.668	53.3154	208.725	32.6074	210.46	41.7078	205.423	30.5594	203.644	40.199	205.413
32.3603	227.033	42.2185	204.51	28.0548	207.82	31.6412	221.965	42.811	204.565	53.4827	209.448	32.6061	211.208	41.8744	206.325	30.3858	204.596	40.3656	206.129
32.3594	227.998	42.2175	205.252	28.3907	208.694	31.8097	222.893	43.1495	205.435	53.4792	210.391	32.7744	212.115	42.0409	207.228	30.7235	205.278	40.5315	207.032
32.6995	228.713	42.5563	206.123	28.3862	209.627	32.149	223.602	43.3177	206.335	53.8161	211.277	32.9433	212.837	42.208	207.947	30.7201	206.205	40.6974	207.937
32.5283	229.709	42.7249	207.024	28.5525	210.346	32.3181	224.341	43.3163	207.08	53.9835	212.005	33.1116	213.747	42.3752	208.667	31.0572	207.076	40.864	208.657
32.528	230.485	42.7239	207.77	28.7182	211.254	32.3164	225.302	43.4846	207.983	53.8104	212.792	33.2805	214.471	42.2013	209.633	31.0544	207.82	40.8597	209.594
32.6979	231.233	42.7223	208.703	28.5441	212.033	32.6557	226.015	43.4832	208.731	54.1473	213.683	33.2785	215.414	42.538	210.514	31.3914	208.694	41.0256	210.504
32.6975	232.01	42.8915	209.422	29.0502	212.887	32.8242	226.951	43.6514	209.637	54.1444	214.444	33.4474	216.14	42.7051	211.238	31.3887	209.44	41.3623	211.199
32.6966	232.984	43.0601	210.33	28.8761	213.669	32.9933	227.695	43.8203	210.358	54.4812	215.338	33.6156	217.057	42.7014	212.18	31.7257	210.317	41.3586	211.953
32.6962	233.764	43.0591	211.081	29.2119	214.554	33.1617	228.634	43.9885	211.268	54.4783	216.101	33.7845	217.786	42.8685	212.906	31.7223	211.254	41.5245	212.868
33.0356	234.684	43.2276	211.992	29.208	215.31	33.501	229.352	44.1573	211.992	54.645	217.028	33.7825	218.735	43.035	213.823	31.8897	211.976	41.5202	213.813
33.0353	235.467	43.3962	212.905	29.3737	216.227	33.4993	230.323	44.4957	212.876	54.8117	217.956	33.9514	219.467	43.2021	214.551	32.0565	212.887	41.5165	214.571
33.2052	236.222	43.7356	213.602	29.3698	216.985	33.4981	231.101	44.4937	213.82	54.9789	218.694	34.2898	220.361	43.3685	215.471	32.2239	213.611	42.0228	215.433
33.034	237.232	43.7339	214.547	29.7056	217.877	33.6672	231.852	44.4923	214.577	54.9754	219.654	34.2878	221.315	43.535	216.393	32.0503	214.583	42.3595	216.135
33.2038	237.99	43.9031	215.275	29.7017	218.638	33.6661	232.632	44.6605	215.495	55.3129	220.366	34.4567	222.051	43.5319	217.154	32.2177	215.31	42.5254	217.058
33.3737	238.749	44.2418	216.166	29.6971	219.591	33.8345	233.581	44.8293	216.225	55.3093	221.33	34.6249	222.979	43.5288	217.917	32.3844	216.227	42.6919	217.792
33.3733	239.538	44.2401	217.116	29.8634	220.325	34.0029	234.531	44.657	217.204	55.6468	222.044	34.6235	223.746	43.8654	218.815	32.5519	216.957	42.8577	218.718
33.3723	240.525	44.4093	217.848	29.8588	221.281	34.172	235.286	44.996	217.908	55.8141	222.789	34.7923	224.485	44.0325	219.551	32.549	217.716	43.0242	219.455
33.3719	241.317	44.5784	218.582	30.0251	222.018	34.3411	236.043	45.1642	218.833	55.6402	223.786	34.9605	225.418	44.0287	220.509	33.0556	218.771	43.3602	220.356
33.3715	242.109	44.5767	219.536	30.1907	222.948	34.169	237.055	45.333	219.568	55.9777	224.504	35.4698	226.103	44.0256	221.277	32.8832	219.371	43.3558	221.316
33.5414	242.874	44.5757	220.301	30.1867	223.717	34.5083	237.786	45.1607	220.554	56.1443	225.447	35.1273	227.125	44.192	222.21	33.2201	220.268	43.5223	222.056
33.5403	243.868	44.9144	221.201	30.1828	224.487	34.337	238.604	45.4997	221.263	56.3116	226.196	35.4663	227.841	44.5293	222.923	33.2167	221.223	43.6888	222.798
33.8803	244.607	44.9133	221.969	30.3484	225.422	34.6755	239.535	45.8381	222.165	56.649	226.918	35.6345	228.78	44.5262	223.695	33.2138	221.989	43.6844	223.763
33.7097	245.433	45.0818	222.901	30.3444	226.194	34.675	240.128	46.0062	223.098	56.8156	227.865	35.8033	229.527	44.6926	224.632	33.3812	222.728	44.1913	224.449
33.7087	246.431	45.2509	223.642	30.6802	227.103	35.0136	241.062	46.5154	223.782	56.9822	228.815	35.8013	230.499	44.6894	225.406	33.2075	223.717	44.3571	225.388
33.8785	247.202	45.4194	224.578	30.506	227.907	35.1827	241.827	46.3437	224.583	57.1494	229.569	35.7999	231.277	44.8558	226.347	33.7153	224.4	44.3533	226.164
34.0483	247.975	45.4183	225.35	30.8425	228.625	35.1808	242.822	46.6827	225.298	57.1465	230.354	35.9687	232.028	45.1931	227.066	33.7118	225.364	44.3489	227.135
33.8777	248.806	45.5874	226.095	30.8378	229.597	35.3498	243.589	46.6806	226.266	57.3137	231.111	36.307	232.946	45.1899	227.844	33.7089	226.136	44.3451	227.913
--	--	45.5857	227.064	31.004	230.346	35.5189	244.359	46.6791	227.041	57.6505	232.037	36.1354	233.757	45.1861	228.818	33.8756	227.074	44.6818	228.635
34.0475	249.58	45.7548	227.812	31.1696	231.292	35.517	245.357	47.0174	227.955	57.4773	232.855	36.3042	234.512	45.3531	229.569	33.8728	227.849	45.0178	229.553
33.7094	249.638	46.0941	228.532	31.1656	232.073	35.5165	245.958	46.8458	228.762	57.6445	233.615	36.3021	235.493	45.5195	230.518	34.2103	228.568	44.8438	230.364
34.221	249.954	46.2626	229.476	31.3318	232.827	35.6848	246.931	47.1847	229.483	57.9812	234.546	36.4709	236.25	45.8567	231.243	34.377	229.51	45.0102	231.118
34.2233	249.954	46.2615	230.256	31.4974	233.777	35.8531	247.905	47.1826	230.459	57.9782	235.338	36.8098	236.979	46.0231	232.195	34.3741	230.289	45.3462	232.041
34.0554	249.982	46.4299	231.204	31.4934	234.562	36.0228	248.48	47.5209	231.379	57.9746	236.33	36.6382	237.796	46.0199	232.98	34.5408	231.235	45.5126	232.798
34.2279	249.954	46.599	231.958	31.4894	235.348	--	--	47.3498	231.995	58.1418	237.096	36.8063	238.754	46.1869	233.738	34.7081	231.987	45.5081	233.782
34.4005	249.925	46.5979	232.742	31.6555	236.107	36.1912	249.457	47.3477	232.975	58.4792	237.834	36.9751	239.516	46.183	234.723	34.7052	232.769	45.6746	234.541
34.4028	249.925	46.5961	233.723	31.6509	237.092	36.1913	249.86	47.6866	233.703	58.4761	238.631	36.9736	240.308	46.35	235.484	34.8725	233.524	45.8403	235.499
34.2349	249.954	46.7651	234.481	31.817	237.853	36.1928	249.86	47.6845	234.687	58.6427	239.601	37.1417	241.27	46.517	236.246	34.869	234.505	46.1769	236.232
34.2372	249.954	46.5931	235.494	31.8123	238.841	36.1944	249.86	47.683	235.475	58.8098	240.371	37.4806	242.007	46.6833	237.207	35.0363	235.262	46.0029	237.053
34.4091	250.126	46.9324	236.225	31.9785	239.605	36.5363	249.803	47.6815	236.264	58.977	241.143	37.4785	243.002	46.6801	238	34.8632	236.078	46.5097	237.76
34.5823	249.896	46.9313	237.016	31.9745	240.398	36.5378	249.803	47.8495	237.223	59.1435	242.117	37.3075	243.628	46.8471	238.765	35.0298	237.034	46.335	238.782
34.4144	249.925	47.1003	237.778	32.3109	241.135	36.5394	249.803	48.0182	237.986	59.3107	242.892	37.4756	244.597	47.1836	239.702	35.1971	237.795	46.6716	239.52
34.4161	250.126	47.2687	238.74	32.4763	242.101	36.5409	249.803	48.0167	238.779	59.4779	243.667	37.4741	245.396	47.1804	240.499	35.3644	238.557	46.6678	240.316
34.4191	249.925	47.4378	239.505	32.3021	242.927	36.5424	249.803	48.0145	239.772	59.8145	244.617	37.6428	246.168	47.1772	241.297	35.3608	239.547	46.8335	241.285
34.4214	249.925	47.6068	240.271	32.6385	243.668	36.544	249.803	48.1839	240.34	59.9817	245.395	37.6414	246.969	47.3441	242.067	35.5281	240.312	46.9998	242.056
34.4237	249.925	47.7752	241.237	32.9741	244.61	36.5455	249.803	48.3519	241.307	60.1489	246.175	37.6392	247.973	47.3409	242.867	35.8649	241.248	46.8258	242.885
34.426	249.925	47.9442	242.006	33.1403	245.382	36.7172	249.774	48.5206	242.076	60.1458	246.984	37.8079	248.748	47.8476	243.783	36.0322	242.015	47.1624	243.629
34.5986	249.896	47.943	242.805	33.3064	246.155	36.7188	249.774	48.6892	242.846	60.6527	247.911	--	--	47.6742	244.614	36.1995	242.783	47.328	244.604
34.4307	249.925	48.1121	243.576	33.3017	247.159	36.7203	249.774	48.687	243.846	60.6496	248.723	37.9766	249.525	47.8411	245.389	36.1965	243.582	47.3242	245.408
34.433	249.925	48.4506	244.52	33.4678	247.935	36.7218	249.774	48.8557	244.619	--	--	37.9765	249.928	47.8379	246.194	36.3631	244.552	47.6608	246.156
34.7758	249.868	48.2792	245.351	33.6339	248.712	36.5532	249.803	49.0243	245.393	60.6465	249.536	38.148	249.899	48.0041	247.173	36.3601	245.353	47.6562	247.164
34.6072	250.097	48.4483	246.125	--	--	36.8951	249.745	48.8519	246.426	60.8151	249.914	37.979	249.928	48.0008	247.981	36.6976	246.098	47.8225	247.944
34.44	249.925	48.6173	246.901	33.4597	249.547	37.0668	249.717	49.0206	247.203	60.8148	249.914	37.9802	249.928	48.1678	248.761	36.6947	246.901	48.1591	248.695
34.6125	249.896	48.6154	247.909	33.7967	250.095	37.0684	249.717	49.3594	247.952	60.8145	249.914	37.9815	249.928	--	--	37.0314	247.849	--	--
34.6148	249.896	48.9546	248.659	33.9662	249.865	37.0699	249.717	49.1877	248.788	60.9844	249.885	37.9827	249.928	48.1645	249.571	37.0285	248.654	48.3254	249.477
34.7874	249.868	--	--	33.7947	249.893	37.0714	249.717	--	--	60.9841	249.885	38.1542	249.899	48.1626	249.976	--	--	47.9832	249.737
34.6188	250.097	48.9534	249.467	33.9636	249.865	37.073	249.717	49.5265	249.539	61.3242	249.828	38.1554	249.899	48.3323	249.947	37.3659	249.404	48.3218	249.882
34.6218	249.896	48.7834	249.9	33.6218	249.922	37.0745	249.717	49.1859	250.001	61.1536	249.857	38.1567	249.899	48.502	249.919	37.7034	250.154	48.4909	249.853
34.4532	250.126	49.1253	249.843	33.7907	249.893	37.0753	249.918	49.5275	249.944	61.3235	249.828	38.1579	249.899	48.6717	249.89	37.3641	249.807	48.4898	249.853
34.7967	249.868	49.2971	249.814	33.7893	249.893	37.2478	249.688	49.6989	249.915	61.3233	249.828	38.3294	249.87	48.501	249.919	37.3639	249.807	48.4887	249.853
34.6288	249.896	49.4688	249.785	33.788	249.893	37.0784	249.918	49.8696	250.089	61.3222	250.031	38.1604	249.899	48.5004	249.919	37.3636	249.807	48.6571	250.028
34.6304	250.097	49.4704	249.785	33.9562	250.067	37.2501	249.89	49.8715	249.886	61.3226	249.828	38.3312	250.072	48.6701	249.89	37.3634	249.807	48.8269	249.796
34.6334	249.896	49.6421	249.757	33.9555	249.865	37.2523	249.688	49.7024	249.915	61.3216	250.031	38.5033	249.842	48.6689	250.093	37.5334	249.779	48.996	249.767
34.6358	249.896	49.4735	249.785	33.9542	249.865	37.2539	249.688	49.8738	249.886	61.4915	250.003	38.5046	249.842	48.8393	249.861	37.5332	249.779	48.9941	249.97
34.6381	249.896	49.475	249.785	33.9529	249.865	37.2554	249.688	49.875	249.886	61.6621	249.77	38.5058	249.842	49.0083	250.036	37.7032	249.75	48.993	249.97
34.6404	249.896	49.3056	250.016	34.1217	249.836	37.0867	249.717	50.0464	249.858	61.6611	249.974	38.6773	249.813	48.8376	250.064	37.8725	249.923	49.1621	249.942
34.4725	249.925	49.8185	249.728	34.1197	250.038	37.2578	249.89	49.8774	249.886	61.6608	249.974	38.6785	249.813	48.8377	249.861	37.7027	249.75	48.9908	249.97
34.645	249.896	49.6491	249.959	34.2893	249.807	37.2593	249.89	50.0481	250.06	61.6605	249.974	38.5095	249.842	49.0067	250.036	37.7018	249.952	48.9897	249.97
34.6467	250.097	49.8216	249.728	34.2873	250.009	37.2608	249.89	50.0493	250.06	61.8304	249.945	38.6803	250.014	49.0062	250.036	37.532	249.779	49.1588	249.942
34.6497	249.896	49.8225	249.93	34.2859	250.009	37.4333	249.659	50.0512	249.858	61.8308	249.742	38.6822	249.813	49.1759	250.007	37.702	249.75	49.3279	249.913
34.6513	250.097	49.824	249.93	34.115	249.836	37.4341	249.861	50.0517	250.06	61.8298	249.945	38.6828	250.014	49.0052	250.036	37.7011	249.952	49.1566	249.942
34.6543	249.896	49.9957	249.902	34.2832	250.009	37.2654	249.89	50.2231	250.031	61.8295	249.945	38.6847	249.813	49.1749	250.007	37.8711	249.923	49.1554	249.942
34.6567	249.896	49.9973	249.902	34.2819	250.009	37.2677	249.688	50.054	250.06	61.8292	249.945	38.8555	249.986	49.1744	250.007	37.8709	249.923	49.3245	249.913
34.8285	250.069	50.169	249.873	34.2806	250.009	37.6089	249.832	50.0559	249.858	61.9991	249.917	38.6865	250.014	49.1738	250.007	37.8706	249.923	49.1532	249.942
34.6613	249.896	50.0004	249.902	34.2792	250.009	37.4402	249.861	50.2266	250.031	61.8286	249.945	38.8587	249.784	49.1733	250.007	37.8711	249.721	49.3223	249.913
34.8338	249.868	50.0019	249.902	34.2779	250.009	37.4418	249.861	50.2278	250.031	61.9985	249.917	38.689	250.014	49.343	249.978	38.0404	249.895	49.3212	249.913
34.6653	250.097	50.1737	249.873	34.2772	249.807	37.4433	249.861	50.229	250.031	62.1684	249.888	39.0307	249.957	49.1723	250.007	37.87	249.923	49.4903	249.884
34.6683	249.896	50.1752	249.873	34.4454	249.981	37.4448	249.861	50.4004	250.003	62.1681	249.888	39.0319	249.957	49.342	249.978	38.0399	249.895	49.3189	249.913
34.6706	249.896	50.1768	249.873	34.4441	249.981	37.447	249.659	50.2314	250.031	62.1678	249.888	39.0332	249.957	49.5117	249.949	38.2099	249.866	49.3178	249.913
34.6729	249.896	50.0081	249.902	34.4427	249.981	37.6181	249.832	50.4027	250.003	62.1675	249.888	38.8642	249.986	49.5112	249.949	38.0395	249.895	49.3167	249.913
34.8448	250.069	50.0096	249.902	34.4414	249.981	37.4494	249.861	50.2337	250.031	62.1672	249.888	38.8655	249.986	49.5106	249.949	38.0393	249.895	49.4858	249.884
34.5074	249.925	50.1814	249.873	34.4401	249.981	37.6212	249.832	50.4051	250.003	62.3371	249.859	39.0369	249.957	49.5101	249.949	38.0391	249.895	49.4847	249.884
34.6792	250.097	50.1829	249.873	34.4387	249.981	37.6227	249.832	50.4063	250.003	62.3368	249.859	39.0381	249.957	49.5096	249.949	38.0388	249.895	49.4836	249.884
34.6822	249.896	50.1845	249.873	34.2672	250.009	37.454	249.861	50.4075	250.003	62.3365	249.859	38.8692	249.986	49.5091	249.949	38.2088	249.866	49.4825	249.884
34.6846	249.896	50.3562	249.844	34.2659	250.009	37.6257	249.832	50.5789	249.974	62.3362	249.859	38.7002	250.014	49.6788	249.921	38.0384	249.895	49.3111	249.913
34.6869	249.896	50.3578	249.844	34.6049	249.952	37.4571	249.861	50.4099	250.003	62.3359	249.859	38.8717	249.986	49.6775	250.124	38.2084	249.866	49.4802	249.884
34.6885	250.097	50.3593	249.844	34.6036	249.952	37.4586	249.861	50.4111	250.003	62.1654	249.888	39.0431	249.957	49.6777	249.921	38.2081	249.866	49.6493	249.856
34.5213	249.925	50.3609	249.844	34.432	249.981	37.6303	249.832	50.5824	249.974	62.3353	249.859	39.0451	249.755	49.6772	249.921	38.3781	249.837	49.8184	249.827
34.8634	250.069	50.3624	249.844	34.4307	249.981	37.6326	249.631	50.7538	249.945	62.5045	250.034	39.0456	249.957	49.6767	249.921	38.3779	249.837	49.6464	250.058
34.8657	250.069	50.364	249.844	34.5996	249.952	37.6334	249.832	50.5848	249.974	62.3347	249.859	39.0469	249.957	49.6762	249.921	38.3777	249.837	49.8162	249.827
34.868	250.069	50.5357	249.816	34.7685	249.923	37.8051	249.804	50.586	249.974	62.3344	249.859	38.8779	249.986	49.5048	250.152	38.3774	249.837	49.6442	250.058
34.7008	249.896	50.367	249.844	34.5969	249.952	37.6365	249.832	50.9276	249.917	62.5043	249.831	38.8791	249.986	49.6751	249.921	38.3772	249.837	49.8139	249.827
34.7025	250.097	50.5388	249.816	34.5956	249.952	37.638	249.832	50.5884	249.974	62.6742	249.802	38.8804	249.986	49.6746	249.921	38.5472	249.809	49.6419	250.058
34.7048	250.097	50.3701	249.844	34.5942	249.952	37.8097	249.804	50.5896	249.974	62.503	250.034	39.0518	249.957	50.0138	250.066	38.3768	249.837	49.8117	249.827
34.7078	249.896	50.3717	249.844	34.5929	249.952	37.8113	249.804	50.761	249.945	62.5027	250.034	39.2233	249.928	49.8431	250.095	38.3765	249.837	49.8099	250.03
34.7094	250.097	50.3732	249.844	34.5916	249.952	37.6426	249.832	50.9323	249.917	62.5031	249.831	39.2245	249.928	49.8426	250.095	38.3763	249.837	49.8095	249.827
34.5422	249.925	50.545	249.816	34.7604	249.923	37.6441	249.832	50.7633	249.945	62.5027	249.831	39.0556	249.957	49.8428	249.892	38.7165	249.78	49.8084	249.827
34.7148	249.896	50.5465	249.816	34.5889	249.952	37.8158	249.804	50.9347	249.917	62.672	250.006	39.3972	249.9	50.0124	249.863	38.3759	249.837	49.8073	249.827
34.7171	249.896	50.5481	249.816	34.7578	249.923	37.8174	249.804	50.9359	249.917	62.6724	249.802	39.3985	249.9	50.0112	250.066	38.5458	249.809	49.9763	249.798
34.8896	249.868	50.3794	249.844	34.5862	249.952	37.6487	249.832	50.9371	249.917	62.5018	249.831	39.2295	249.928	50.0114	249.863	38.5456	249.809	49.9745	250.001
34.7217	249.896	50.5511	249.816	34.7551	249.923	37.8204	249.804	50.9383	249.917	62.8413	249.977	39.401	249.9	49.84	250.095	38.3752	249.837	49.8039	249.827
34.8943	249.868	50.5527	249.816	34.5836	249.952	37.822	249.804	50.9395	249.917	62.6707	250.006	39.4022	249.9	50.1799	250.038	38.5452	249.809	49.9723	250.001
34.8959	250.069	50.5542	249.816	34.7524	249.923	37.8235	249.804	51.1102	250.091	62.6704	250.006	39.5737	249.871	50.0091	250.066	38.5449	249.809	49.9712	250.001
34.728	250.097	50.5558	249.816	34.7511	249.923	37.6548	249.832	51.112	249.888	62.4999	250.034	39.4047	249.9	50.1795	249.835	38.7149	249.78	49.9701	250.001
34.9012	249.868	50.5573	249.816	34.92	249.895	37.8266	249.804	51.1132	249.888	62.6698	250.006	39.2357	249.928	50.0081	250.066	38.5445	249.809	50.1399	249.769
34.7334	249.896	50.5589	249.816	34.7484	249.923	37.6579	249.832	51.2839	250.062	62.6702	249.802	39.4072	249.9	50.0083	249.863	38.7145	249.78	49.9678	250.001
34.7357	249.896	50.5604	249.816	34.9173	249.895	37.6594	249.832	51.2858	249.859	62.6692	250.006	39.5786	249.871	50.1773	250.038	38.7142	249.78	49.9667	250.001
34.7373	250.097	50.7321	249.787	34.9159	249.895	37.8312	249.804	51.2863	250.062	62.6696	249.802	39.2395	249.928	50.1768	250.038	38.714	249.78	49.9656	250.001
34.9105	249.868	50.7337	249.787	34.9146	249.895	37.6625	249.832	51.2882	249.859	62.6686	250.006	39.2407	249.928	50.1763	250.038	38.7138	249.78	49.9645	250.001
34.9122	250.069	50.7352	249.787	34.9133	249.895	37.8342	249.804	51.2887	250.062	62.669	249.802	39.4122	249.9	50.3459	250.009	38.7136	249.78	50.1336	249.972
34.745	249.896	50.7368	249.787	34.7417	249.923	37.8357	249.804	51.2905	249.859	62.668	250.006	39.4134	249.9	50.3454	250.009	38.8836	249.751	50.3027	249.944
34.7473	249.896	50.5681	249.816	34.9106	249.895	37.8373	249.804	51.291	250.062	62.8379	249.977	39.4147	249.9	50.1747	250.038	38.7131	249.78	50.1313	249.972
34.7496	249.896	50.7399	249.787	34.9093	249.895	38.009	249.775	51.2922	250.062	62.8376	249.977	39.4159	249.9	50.3444	250.009	38.8831	249.751	50.1302	249.972
34.7513	250.097	50.5712	249.816	35.0781	249.866	37.6701	249.832	51.2941	249.859	62.8373	249.977	39.4171	249.9	50.1737	250.038	38.712	249.982	50.1291	249.972
34.7543	249.896	50.743	249.787	34.7364	249.923	37.8419	249.804	51.2953	249.859	63.0072	249.948	39.4184	249.9	50.1731	250.038	38.5422	249.809	49.9578	250.001
34.9261	250.069	50.7445	249.787	34.9053	249.895	38.0136	249.775	51.2958	250.062	63.0069	249.948	39.2494	249.928	50.3428	250.009	38.8824	249.751	50.1269	249.972
34.9291	249.868	50.746	249.787	34.7337	249.923	38.0151	249.775	51.297	250.062	62.8364	249.977	39.4209	249.9	50.1721	250.038	38.7113	249.982	50.1258	249.972
34.9314	249.868	50.7476	249.787	35.0728	249.866	37.8465	249.804	51.1286	249.888	62.8361	249.977	39.4221	249.9	50.1716	250.038	38.882	249.751	50.1247	249.972
34.9331	250.069	50.9194	249.758	35.0714	249.866	37.848	249.804	51.1298	249.888	62.8358	249.977	39.4234	249.9	50.1711	250.038	38.7116	249.78	49.9533	250.001
34.7659	249.896	50.9209	249.758	34.8999	249.895	37.8495	249.804	51.3005	250.062	62.8355	249.977	39.5948	249.871	50.1705	250.038	38.7113	249.78	50.1224	249.972
34.9377	250.069	50.7522	249.787	35.239	249.837	37.8511	249.804	51.3017	250.062	62.8352	249.977	39.4259	249.9	50.3402	250.009	38.7111	249.78	50.1213	249.972
34.7705	249.896	50.924	249.758	34.8972	249.895	37.8526	249.804	51.4731	250.033	62.8349	249.977	39.4271	249.9	50.5099	249.98	38.7109	249.78	50.1202	249.972
34.6026	249.925	50.7553	249.787	34.8959	249.895	37.8541	249.804	51.3041	250.062	62.8346	249.977	39.4284	249.9	50.169	250.038	38.71	249.982	50.2893	249.944
34.7752	249.896	50.9271	249.758	35.235	249.837	38.0259	249.775	51.1358	249.888	62.8343	249.977	39.5998	249.871	50.3387	250.009	38.7104	249.78	50.118	249.972
34.947	250.069	50.7584	249.787	35.2336	249.837	38.0274	249.775	51.3065	250.062	63.0042	249.948	39.7713	249.842	50.3382	250.009	38.8804	249.751	50.2871	249.944
34.9494	250.069	50.9302	249.758	35.0621	249.866	38.0289	249.775	51.3076	250.062	63.0039	249.948	39.6023	249.871	50.1674	250.038	38.7093	249.982	50.1157	249.972
34.9517	250.069	50.9317	249.758	35.0607	249.866	38.0305	249.775	51.1386	250.091	63.0042	249.745	39.7737	249.842	50.3371	250.009	38.8793	249.953	50.1146	249.972
34.7845	249.896	50.763	249.787	35.0587	250.068	38.032	249.775	51.4802	250.033	62.8331	249.977	39.6048	249.871	50.1664	250.038	38.8797	249.751	50.2837	249.944
34.9563	250.069	50.9348	249.758	35.0581	249.866	38.0335	249.775	51.3119	249.859	62.8327	249.977	39.7762	249.842	50.3361	250.009	38.7093	249.78	50.4528	249.915
34.7884	250.097	50.9357	249.961	35.0567	249.866	37.8648	249.804	51.3124	250.062	63.0027	249.948	39.6073	249.871	50.5058	249.98	38.8793	249.751	50.2815	249.944
34.7914	249.896	50.7677	249.787	35.0554	249.866	38.0366	249.775	51.3143	249.859	63.0023	249.948	39.6085	249.871	50.3351	250.009	38.7088	249.78	50.2803	249.944
34.964	249.868	50.9394	249.758	35.0541	249.866	38.0381	249.775	51.3148	250.062	63.1722	249.92	39.6098	249.871	50.5047	249.98	38.7086	249.78	50.4494	249.915
34.9656	250.069	51.1105	249.932	35.2229	249.837	37.8694	249.804	51.3159	250.062	62.8315	249.977	39.7812	249.842	50.334	250.009	38.7084	249.78	50.2781	249.944
34.7984	249.896	51.112	249.932	35.2216	249.837	38.2114	249.746	51.4873	250.033	63.1716	249.92	39.7825	249.842	50.5037	249.98	38.8784	249.751	50.277	249.944
34.971	249.868	51.1143	249.73	35.2203	249.837	38.2129	249.746	51.6587	250.005	63.0011	249.948	39.7837	249.842	50.333	250.009	38.8775	249.953	50.4461	249.915
34.9726	250.069	51.1151	249.932	35.2189	249.837	37.874	249.804	51.4897	250.033	63.0008	249.948	39.6147	249.871	50.5027	249.98	39.0474	249.925	50.445	249.915
34.9756	249.868	51.1174	249.73	35.2176	249.837	38.0457	249.775	51.4909	250.033	63.0005	249.948	39.7862	249.842	50.3319	250.009	39.0472	249.925	50.4439	249.915
34.9772	250.069	50.9487	249.758	35.2156	250.039	38.2175	249.746	51.4921	250.033	63.0002	249.948	39.7874	249.842	50.3314	250.009	39.047	249.925	50.4427	249.915
34.9796	250.069	51.1198	249.932	35.2149	249.837	38.219	249.746	51.4933	250.033	63.1701	249.92	39.788	250.044	50.5011	249.98	38.8772	249.751	50.4416	249.915
34.6422	249.925	51.1213	249.932	35.3838	249.809	38.0504	249.775	51.6647	250.005	62.9996	249.948	39.7899	249.842	50.5006	249.98	39.0472	249.722	50.4405	249.915
34.8147	249.896	51.1235	249.73	35.2122	249.837	38.0519	249.775	51.4956	250.033	62.9993	249.948	39.621	249.871	50.3299	250.009	39.0463	249.925	50.6096	249.886
34.817	249.896	50.9549	249.758	35.2109	249.837	38.2236	249.746	51.4968	250.033	63.3394	249.891	39.7924	249.842	50.4996	249.98	38.8766	249.751	50.6085	249.886
34.8193	249.896	51.1259	249.932	35.5493	249.982	38.2251	249.746	51.498	250.033	62.9987	249.948	39.6235	249.871	50.499	249.98	39.0459	249.925	50.4372	249.915
34.9912	250.069	51.1282	249.73	35.3777	250.011	38.2267	249.746	51.4992	250.033	63.1686	249.92	39.9651	249.814	50.4985	249.98	38.8754	249.953	50.4361	249.915
34.824	249.896	51.129	249.932	35.2069	249.837	38.058	249.775	51.5004	250.033	63.3385	249.891	39.626	249.871	50.498	249.98	39.0461	249.722	50.4349	249.915
34.8256	250.097	51.1306	249.932	35.2056	249.837	38.0595	249.775	51.6718	250.005	63.168	249.92	39.7967	250.044	50.3273	250.009	38.875	249.953	50.604	249.886
34.8286	249.896	51.1321	249.932	35.2042	249.837	38.0611	249.775	51.5027	250.033	63.1677	249.92	39.9689	249.814	50.497	249.98	39.2152	249.896	50.4327	249.915
34.8303	250.097	51.1337	249.932	35.2022	250.039	38.0626	249.775	51.3337	250.062	62.9972	249.948	39.7999	249.842	50.4965	249.98	39.0447	249.925	50.4316	249.915
34.8333	249.896	50.9657	249.758	35.3718	249.809	38.2343	249.746	51.5051	250.033	63.1671	249.92	39.9713	249.814	50.6661	249.952	39.0445	249.925	50.4305	249.915
--	--	51.1367	249.932	35.2002	249.837	38.0656	249.775	51.5063	250.033	63.1668	249.92	39.6322	249.871	50.4954	249.98	39.0443	249.925	50.4294	249.915
34.8349	250.097	51.1383	249.932	35.3691	249.809	38.0672	249.775	51.5075	250.033	63.1665	249.92	39.8036	249.842	50.4949	249.98	39.0448	249.722	50.5984	249.886
34.5016	248.748	51.1398	249.932	35.5373	249.982	38.0687	249.775	51.6789	250.005	63.1662	249.92	39.8049	249.842	50.4944	249.98	39.0438	249.925	50.4271	249.915
35.0145	248.662	51.3116	249.903	35.1962	249.837	38.4107	249.718	51.5099	250.033	63.3361	249.891	39.8061	249.842	50.6641	249.952	39.0436	249.925	50.426	249.915
34.8494	247.889	51.1429	249.932	35.1949	249.837	38.242	249.746	51.6813	250.005	63.3358	249.891	39.6371	249.871	50.6635	249.952	39.2136	249.896	50.5951	249.886
34.8551	246.887	51.1445	249.932	35.3637	249.809	38.4137	249.718	51.5122	250.033	63.3355	249.891	39.8086	249.842	50.4928	249.98	39.0432	249.925	50.7642	249.858
34.6893	246.316	51.146	249.932	35.1922	249.837	--	--	51.6836	250.005	63.3352	249.891	39.8098	249.842	50.6625	249.952	39.2131	249.896	50.5929	249.886
34.695	245.318	51.1482	249.73	35.3604	250.011	38.4153	249.718	51.6848	250.005	63.3349	249.891	39.8111	249.842	50.4918	249.98	39.2129	249.896	50.5917	249.886
34.7	244.521	51.3193	249.903	35.3597	249.809	38.0798	248.767	51.686	250.005	63.1643	249.92	39.6421	249.871	50.6615	249.952	39.0425	249.925	50.5906	249.886
34.7051	243.724	51.1506	249.932	35.1882	249.837	38.2522	248.537	51.6872	250.005	63.5044	249.862	39.8136	249.842	50.4907	249.98	39.0423	249.925	50.5895	249.886
34.7101	242.929	51.3224	249.903	35.3571	249.809	38.2565	247.733	51.6884	250.005	63.3339	249.891	39.6446	249.871	50.6604	249.952	39.042	249.925	50.5884	249.886
34.7158	241.937	51.1537	249.932	35.1855	249.837	38.2614	246.729	51.5194	250.033	63.3336	249.891	39.8161	249.842	50.4897	249.98	39.0418	249.925	50.5873	249.886
34.5506	241.173	51.1553	249.932	35.3537	250.011	38.2657	245.927	51.6908	250.005	63.5035	249.862	39.8173	249.842	50.6594	249.952	39.2118	249.896	50.7564	249.858
34.5556	240.382	51.327	249.903	35.1828	249.837	38.0997	245.155	51.6919	250.005	63.333	249.891	39.9881	250.015	50.4887	249.98	39.3818	249.867	50.5844	250.089
34.5606	239.591	51.1583	249.932	35.5212	249.982	38.104	244.356	51.6931	250.005	63.3327	249.891	39.8198	249.842	50.6584	249.952	39.3815	249.867	50.7542	249.858
34.5663	238.605	51.3301	249.903	35.3497	250.011	38.2784	243.529	51.6943	250.005	63.3324	249.891	39.8211	249.842	50.9983	249.894	39.2111	249.896	50.5828	249.886
34.4011	237.846	51.3317	249.903	35.3484	250.011	38.1125	242.76	51.8657	249.976	63.3321	249.891	39.8223	249.842	50.8275	249.923	39.3811	249.867	50.7519	249.858
34.4061	237.06	51.3332	249.903	35.347	250.011	38.1174	241.765	51.8669	249.976	63.6722	249.834	39.9937	249.814	50.6568	249.952	39.3809	249.867	50.5806	249.886
34.4111	236.274	51.1652	249.73	35.5159	249.982	38.1216	240.97	51.6979	250.005	63.3315	249.891	39.9943	250.015	50.6563	249.952	39.3807	249.867	50.7497	249.858
34.4167	235.294	51.1661	249.932	35.5152	249.78	38.1258	240.177	51.5288	250.033	63.3312	249.891	--	--	50.6558	249.952	39.2102	249.896	50.5784	249.886
34.4217	234.511	51.3378	249.903	35.5132	249.982	37.9605	239.215	51.7002	250.005	63.3309	249.891	39.9956	250.015	50.6553	249.952	39.21	249.896	50.7475	249.858
34.4267	233.729	51.1692	249.932	35.3417	250.011	37.9648	238.424	51.7014	250.005	--	--	39.4903	248.892	50.8249	249.923	39.2098	249.896	50.7463	249.858
34.2621	232.783	51.3409	249.903	35.5105	249.982	37.969	237.634	51.7026	250.005	63.3306	249.891	39.8326	248.634	50.6542	249.952	39.2096	249.896	50.9154	249.829
34.2671	232.004	51.3425	249.903	--	--	38.1434	236.817	51.7038	250.005	63.3331	249.077	39.8366	247.829	50.6537	249.952	39.0391	249.925	50.9143	249.829
34.4423	231.197	51.344	249.903	35.3397	249.809	37.8072	236.087	51.705	250.005	63.3341	248.67	39.8413	246.825	50.6532	249.952	39.2091	249.896	50.7423	250.061
34.4473	230.42	51.3455	249.903	35.1716	248.828	38.1525	235.046	51.7062	250.005	63.3373	247.655	39.8452	246.023	--	--	39.0387	249.925	--	--
34.2827	229.479	51.3471	249.903	35.5113	248.569	37.9865	234.29	51.7073	250.005	63.3391	247.046	39.8492	245.223	50.6527	249.952	39.0391	249.722	50.7419	249.858
34.2876	228.705	--	--	35.3425	247.792	37.9907	233.506	--	--	63.172	246.063	39.683	244.452	50.996	248.881	--	--	50.4045	248.698
34.1224	227.96	51.3486	249.903	35.5141	246.958	37.8246	232.752	51.7085	250.005	63.1744	245.254	39.6869	243.653	50.826	248.707	39.0382	249.925	50.7438	248.641
34.128	226.996	50.5026	249.035	35.3453	246.183	37.8295	231.775	51.7139	248.79	63.1769	244.446	39.8611	242.827	50.658	247.926	39.3818	248.857	50.7461	247.629
34.3031	226.196	51.1863	248.516	35.3467	245.381	37.8337	230.995	51.8852	248.762	63.1793	243.64	39.8657	241.832	50.8304	247.089	39.0426	248.511	50.5775	246.85
34.1379	225.455	51.1906	247.709	35.519	244.35	37.8379	230.216	51.8899	247.752	63.0122	242.662	39.8697	241.038	50.6631	246.109	39.2153	247.677	50.5785	246.244
34.1435	224.495	51.3651	246.874	35.3502	243.579	37.8427	229.244	51.7236	246.974	63.0147	241.858	39.7034	240.273	50.6653	245.304	39.0476	246.901	50.5808	245.237
33.808	223.786	51.3694	246.068	35.3515	242.78	37.8469	228.467	51.5573	246.197	63.0171	241.055	39.5371	239.509	50.6676	244.499	38.8799	246.126	50.5824	244.432
33.9838	222.8	51.2035	245.293	35.3529	241.983	37.6808	227.721	51.5612	245.393	62.8493	240.283	39.712	238.492	50.4996	243.724	39.0533	245.094	50.4138	243.657
33.8185	222.064	51.2084	244.29	35.1841	241.215	37.6856	226.753	51.3949	244.618	62.6815	239.511	39.7152	237.899	50.672	242.894	39.0558	244.293	50.5856	242.826
33.824	221.111	51.2127	243.488	35.3563	240.192	37.6898	225.98	51.569	243.787	62.8541	238.683	39.89	236.884	50.6749	241.892	38.8881	243.522	50.417	242.053
33.9992	220.32	51.0468	242.716	35.1875	239.427	37.694	225.209	51.5736	242.786	62.6863	237.913	39.5535	236.154	50.5069	241.121	38.8906	242.723	50.2491	241.082
34.0047	219.369	51.2212	241.888	35.1889	238.634	37.5286	224.275	51.5775	241.987	62.6894	236.917	39.7276	235.339	50.5091	240.323	39.0633	241.896	50.2507	240.283
33.8394	218.639	51.0553	241.119	35.1902	237.842	37.5327	223.505	51.4112	241.217	62.5216	236.15	39.7322	234.357	50.3411	239.554	39.0657	241.1	50.4225	239.456
33.8443	217.881	51.0602	240.123	35.022	236.883	37.7071	222.709	51.586	240.192	62.5247	235.157	39.5659	233.602	50.6837	238.701	38.8987	240.134	50.2539	238.689
34.0194	217.095	51.0645	239.327	35.1936	236.065	37.5416	221.779	51.4197	239.425	62.5264	234.562	39.5698	232.819	50.6858	237.906	38.9012	239.34	50.2562	237.694
33.8547	216.179	51.0687	238.533	35.0247	235.306	37.5458	221.014	51.2534	238.659	62.5294	233.572	39.5737	232.038	50.688	237.112	38.9036	238.548	50.0875	236.929
33.6901	215.265	51.0729	237.74	35.026	234.519	37.5499	220.25	51.4275	237.837	62.3616	232.81	39.4081	231.091	50.5207	236.149	38.7359	237.785	50.2593	236.108
33.8652	214.484	51.248	236.721	34.8578	233.566	37.5547	219.296	51.2612	237.073	62.5349	231.795	39.5822	230.283	50.5228	235.358	38.5682	237.023	50.2609	235.316
33.6998	213.761	51.0814	236.157	34.8592	232.781	37.3886	218.563	51.4352	236.253	62.1968	231.064	39.4159	229.534	50.3548	234.597	38.7415	236.007	50.2625	234.525
33.8749	212.981	51.0863	235.17	34.8605	231.998	37.3933	217.612	51.2696	235.294	62.1992	230.277	39.4204	228.563	50.3576	233.61	38.7439	235.219	50.0945	233.568
33.54	212.102	51.0905	234.381	35.032	231.187	37.3974	216.853	51.1032	234.534	62.2016	229.491	39.5945	227.759	50.3598	232.823	38.5769	234.265	50.0961	232.78
33.7157	211.138	50.9245	233.623	34.8631	230.435	37.232	215.935	51.1078	233.55	62.2046	228.51	39.4288	226.821	50.5322	232.007	38.5793	233.479	49.9281	231.825
33.7206	210.391	50.7592	232.669	35.0353	229.432	37.4063	215.149	51.111	232.96	62.0368	227.756	39.2619	226.27	50.3648	231.055	38.5817	232.695	49.9297	231.04
33.5559	209.489	50.9336	231.855	34.8671	228.488	37.2402	214.423	51.1155	231.979	62.2093	226.945	39.2664	225.305	50.5371	230.242	38.5842	231.912	49.9312	230.255
33.5607	208.744	50.9378	231.072	34.8684	227.711	37.4151	213.451	51.2895	231.166	61.8713	226.221	39.4404	224.506	50.3691	229.488	38.7575	230.906	49.9327	229.472
33.396	207.845	50.7718	230.318	34.6995	226.964	37.249	212.727	51.1232	230.412	61.8743	225.246	39.6152	223.515	50.3712	228.706	38.589	230.349	49.7647	228.524
33.4008	207.103	50.6065	229.371	34.7014	225.996	37.2537	211.788	50.9575	229.464	61.7064	224.497	39.4488	222.776	50.2038	227.759	38.2517	229.432	49.7663	227.743
33.4063	206.178	50.7809	228.562	34.7021	225.416	37.2585	210.85	51.1315	228.655	62.0492	223.662	39.4527	222.009	50.3761	226.951	38.425	228.431	49.5976	226.992
33.5814	205.41	50.6155	227.617	34.704	224.451	37.0923	210.13	51.1354	227.876	61.7118	222.749	39.287	221.081	50.3783	226.173	38.4274	227.654	49.9395	226.156
33.5868	204.488	50.6197	226.84	34.706	223.488	37.0964	209.382	51.1392	227.098	61.7141	221.974	39.461	220.288	50.2102	225.425	38.7702	226.82	49.6007	225.437
33.4221	203.596	50.7941	226.035	34.7072	222.718	36.9309	208.478	50.9735	226.156	61.7164	221.201	39.1251	219.392	50.2129	224.456	38.4322	226.103	49.6028	224.467
33.2567	202.89	50.7983	225.26	34.7085	221.95	37.1052	207.704	51.1475	225.352	61.7194	220.235	39.1289	218.63	50.2151	223.682	38.2651	225.165	49.7746	223.664
33.4317	202.127	50.6323	224.515	34.37	221.048	36.9397	206.803	50.9811	224.607	61.5515	219.493	39.1334	217.68	49.8768	222.966	38.6079	224.336	49.6059	222.919
33.2669	201.24	50.4669	223.578	34.5415	220.254	37.1139	206.032	50.8154	223.67	61.5545	218.531	39.1372	216.921	50.2199	221.944	38.4401	223.594	49.608	221.954
33.4419	200.48	50.6419	222.585	34.5428	219.489	37.1186	205.105	50.9894	222.869	61.5568	217.762	39.141	216.163	50.0518	221.202	38.2729	222.66	49.6095	221.183
33.2772	199.596	50.6461	221.815	34.7149	218.506	36.9524	204.394	50.9932	222.099	61.5591	216.995	39.1455	215.217	50.2241	220.403	38.2753	221.892	49.611	220.413
33.2826	198.686	50.6502	221.047	34.5459	217.773	37.1273	203.442	50.9976	221.137	61.3918	216.066	39.1493	214.461	50.0567	219.472	38.2777	221.125	49.443	219.481
33.1178	197.806	50.6544	220.279	34.5472	217.012	36.9618	202.549	50.8312	220.398	61.2239	215.33	39.324	213.49	50.0588	218.705	38.2807	220.167	49.6147	218.685
33.1226	197.08	50.6585	219.513	34.5491	216.062	36.7956	201.842	51.0059	219.411	61.0566	214.404	39.1576	212.766	50.2317	217.719	38.2831	219.403	49.4466	217.757
32.9578	196.203	50.4931	218.585	34.3801	215.333	36.9698	201.078	51.0097	218.646	61.2291	213.613	39.1614	212.014	50.0636	216.984	38.1159	218.477	49.4481	216.992
32.9626	195.479	50.4979	217.63	34.5515	214.547	36.8043	200.19	50.8432	217.91	60.8917	212.72	38.9956	211.105	50.0657	216.221	38.2885	217.686	49.28	216.067
32.968	194.577	50.6723	216.839	34.5534	213.602	36.8089	199.274	51.0179	216.928	60.8939	211.96	38.9994	210.356	49.8982	215.297	38.2909	216.926	49.2815	215.305
32.9733	193.676	50.3366	215.945	34.3851	212.688	36.6427	198.572	50.8514	216.195	60.8962	211.202	39.0038	209.421	49.9002	214.537	38.1237	216.005	49.4538	214.325
32.9787	192.777	50.511	215.156	34.3863	211.934	36.6474	197.66	50.6857	215.273	60.7289	210.284	39.0076	208.674	49.9029	213.587	38.126	215.246	49.4553	213.565
32.9835	192.059	50.3449	214.426	34.2173	211.211	36.652	196.75	50.6894	214.514	60.7312	209.528	39.012	207.743	50.0752	212.8	38.129	214.3	49.2865	212.836
32.8186	191.192	50.1795	213.508	34.3894	210.244	36.8262	195.994	50.8634	213.727	60.7341	208.584	38.8456	207.028	49.9071	212.072	37.9611	213.573	49.2887	211.89
32.824	190.298	50.3538	212.723	34.221	209.336	36.4904	195.145	50.6976	212.81	60.5668	207.672	38.85	206.099	50.08	211.099	37.9635	212.818	49.1199	211.163
32.8288	189.584	50.3579	211.968	34.3924	208.559	36.6646	194.392	50.7013	212.055	60.569	206.92	38.8544	205.173	49.9118	210.373	37.9665	211.877	49.122	210.22
32.6639	188.722	50.3626	211.026	34.2234	207.841	36.6692	193.488	50.5355	211.141	60.5713	206.169	38.6879	204.461	49.9138	209.62	38.139	211.096	48.9532	209.495
32.8395	187.804	50.1972	210.114	34.2253	206.909	36.5036	192.615	50.5393	210.389	60.5742	205.232	38.6923	203.538	49.9172	208.493	37.9718	210.186	49.1249	208.714
32.8442	187.094	50.2013	209.363	34.0562	206.193	36.5076	191.894	50.5437	209.449	60.4062	204.512	38.6961	202.8	49.7483	207.959	38.1443	209.407	48.9567	207.805
32.6793	186.237	50.206	208.426	34.0581	205.264	36.6824	190.966	50.5474	208.699	60.2389	203.608	38.87	202.035	49.9212	206.993	37.8068	208.53	48.9582	207.055
32.6847	185.353	50.0399	207.706	34.0593	204.522	36.5167	190.098	50.5511	207.95	60.4119	202.647	38.7042	201.145	49.7537	206.087	37.8098	207.596	48.79	206.149
32.69	184.471	50.2142	206.93	34.2313	203.568	36.5207	189.382	50.3853	207.044	60.4142	201.902	38.7086	200.228	49.7557	205.34	37.8115	207.037	48.7921	205.215
32.6953	183.59	50.0487	206.026	34.0622	202.857	36.3551	188.517	50.5592	206.268	60.4164	201.159	38.7123	199.496	49.7583	204.409	37.815	205.92	48.9637	204.441
32.5304	182.741	50.223	205.253	34.0641	201.935	36.3596	187.625	50.3934	205.366	60.4192	200.232	38.7166	198.582	49.5902	203.693	37.8167	205.363	48.9651	203.696
32.3649	182.068	50.0575	204.352	34.0652	201.198	36.5338	186.883	50.3977	204.436	60.2512	199.52	38.8906	197.823	49.5928	202.765	37.65	204.279	48.797	202.796
32.5404	181.163	49.8913	203.639	34.067	200.279	36.5384	185.995	50.4014	203.693	60.0839	198.625	38.5545	196.97	49.5948	202.023	37.6523	203.539	48.9692	201.84
32.7159	180.261	49.896	202.712	33.898	199.573	36.3727	185.136	50.2356	202.796	59.9165	197.732	38.5588	196.062	49.4272	201.127	37.6546	202.799	48.8004	201.129
32.5504	179.592	49.9007	201.788	34.0699	198.628	36.2064	184.457	50.2392	202.056	59.9187	196.995	38.5625	195.336	49.4292	200.388	37.8277	201.848	48.6316	200.418
32.3855	178.75	49.7345	201.079	33.9009	197.926	36.211	183.573	50.2436	201.132	59.7513	196.105	38.3967	194.459	49.4318	199.466	37.6604	200.956	48.6336	199.496
32.3914	177.708	49.9094	200.128	34.0729	196.984	36.2155	182.691	50.2473	200.395	59.9237	195.342	38.5712	193.526	49.4338	198.729	37.6627	200.221	48.6356	198.575
32.396	177.015	49.9135	199.393	33.9044	196.102	36.0498	181.839	50.2516	199.475	59.7563	194.455	38.4047	192.833	49.6066	197.782	37.6656	199.303	48.637	197.84
32.2311	176.178	49.7479	198.504	33.9055	195.374	36.0543	180.961	50.0851	198.769	59.5889	193.57	38.5792	191.904	49.4384	197.077	37.6679	198.57	48.639	196.922
32.406	175.458	49.5824	197.616	33.9073	194.466	36.2284	180.23	50.0894	197.852	59.5917	192.657	38.4133	191.034	49.2708	196.19	37.6701	197.839	48.4702	196.219
32.4112	174.596	49.9268	196.827	33.9084	193.741	36.233	179.355	50.0937	196.937	59.5939	191.929	38.417	190.316	49.2734	195.276	37.8432	196.897	48.3026	195.151
32.2463	173.765	49.7606	196.125	33.7406	192.684	36.2375	178.481	49.9271	196.235	59.7662	191.172	38.4213	189.42	49.6157	194.488	37.8461	195.986	48.4742	194.392
32.2515	172.907	49.7653	195.213	33.7417	191.962	36.0717	177.638	50.1016	195.294	59.4286	190.322	38.4256	188.526	49.4481	193.606	37.6781	195.287	48.4755	193.663
32.0865	172.079	49.5997	194.332	33.7434	191.061	36.0762	176.768	49.9351	194.594	59.6016	189.387	38.4292	187.813	49.2799	192.908	37.681	194.379	48.3073	192.783
32.0918	171.224	49.6037	193.606	33.5743	190.37	35.9099	176.103	49.7691	193.714	59.4342	188.512	38.4335	186.922	49.2824	192.001	37.5136	193.502	48.3093	191.875
32.097	170.371	49.6084	192.699	33.9158	189.594	35.9144	175.236	49.9436	192.779	59.2661	187.819	38.2675	186.062	49.1148	191.124	37.5159	192.778	48.3106	191.151
32.2724	169.491	49.4422	192.004	33.5778	188.576	36.0891	174.342	49.7771	192.083	59.0987	186.947	38.4414	185.323	49.2869	190.371	37.3485	191.904	48.1424	190.275
32.1074	168.67	49.4468	191.101	33.749	187.832	36.0935	173.478	49.9515	191.15	59.1014	186.048	38.4457	184.437	48.9491	189.527	37.3514	191.003	48.3145	189.344
32.1126	167.822	49.4514	190.199	33.5806	186.968	36.098	172.617	49.9558	190.248	58.9333	185.359	38.2791	183.759	49.292	188.568	37.3542	190.104	48.1457	188.652
32.1172	167.145	49.4554	189.479	33.412	186.105	35.762	171.815	49.7892	189.557	59.1063	184.434	38.1138	182.729	49.1237	187.878	37.3564	189.386	48.3178	187.724
31.9528	166.161	49.46	188.581	33.5839	185.187	35.9367	170.928	49.7934	188.658	58.9388	183.569	38.2876	181.996	48.9561	187.009	37.3592	188.489	48.1489	187.034
32.1282	165.29	49.6348	187.655	33.4148	184.506	35.7703	170.272	49.9673	187.911	58.9415	182.676	38.1216	181.146	48.9586	186.114	37.021	187.832	47.9806	186.167
32.1334	164.449	49.4686	186.968	33.7569	183.562	35.7748	169.417	49.8013	187.045	58.9437	181.963	38.2961	180.24	49.1307	185.369	37.3642	186.881	47.8124	185.302
31.9684	163.639	49.3029	186.103	33.4181	182.735	35.6096	168.423	49.6353	186.18	58.9464	181.074	38.1301	179.393	48.963	184.506	37.3671	185.989	47.9845	184.38
31.9735	162.802	49.3075	185.212	33.4192	182.029	35.7836	167.713	49.8091	185.437	58.7789	180.216	38.1337	178.694	48.9655	183.615	37.3693	185.278	47.9858	183.668
31.8085	161.996	49.3115	184.5	33.2507	181.177	35.6178	166.893	49.6431	184.575	58.6108	179.536	38.1379	177.822	49.1376	182.875	37.3721	184.39	47.8175	182.807
31.8136	161.162	49.1464	183.463	33.4225	180.268	35.7925	166.016	49.6474	183.687	58.4433	178.681	38.1421	176.952	48.9699	182.016	37.3748	183.504	47.8194	181.92
31.6486	160.359	49.1504	182.753	33.4242	179.39	35.7969	165.17	49.6516	182.8	58.446	177.798	38.1463	176.083	48.9724	181.13	37.2068	182.825	47.8207	181.211
31.8239	159.5	49.3251	181.839	33.4252	178.69	35.6311	164.355	49.6551	182.091	58.4487	176.918	38.1505	175.216	48.8047	180.275	37.0394	181.971	47.8226	180.326
31.4887	158.73	49.1589	181.162	33.2566	177.844	35.4658	163.374	49.6593	181.207	58.4514	176.039	37.9845	174.38	48.6364	179.598	37.2129	180.885	47.6543	179.473
31.664	157.875	49.3336	180.251	33.2583	176.971	35.4696	162.701	49.6635	180.325	58.4534	175.337	38.1583	173.66	48.8091	178.688	37.2151	180.181	47.8263	178.563
31.4989	157.079	49.168	179.4	33.2599	176.101	35.474	161.863	49.3273	179.503	58.2859	174.49	37.822	172.856	48.8115	177.809	37.0477	179.332	47.658	177.713
31.5046	156.092	49.1725	178.522	33.0913	175.26	35.6486	160.997	49.6713	178.742	58.2886	173.617	37.9964	171.967	48.814	176.932	37.0498	178.632	47.4897	176.865
31.6794	155.406	49.0068	177.675	33.0929	174.393	35.4828	160.191	49.5058	177.719	58.121	172.773	38.0006	171.109	48.8159	176.232	37.0526	177.757	47.4915	175.989
31.3441	154.645	49.3511	176.917	33.0939	173.701	35.4871	159.357	49.3392	177.048	58.2933	172.048	38.175	170.223	48.8183	175.358	37.2255	176.855	47.3226	175.319
31.3497	153.664	49.0152	176.102	33.0955	172.836	35.3213	158.555	49.5136	176.145	57.9561	171.064	37.8387	169.427	48.8208	174.485	37.2283	175.985	47.4947	174.418
31.3548	152.849	49.19	175.201	33.0971	171.974	35.3256	157.725	49.3469	175.476	58.129	170.168	38.013	168.545	48.4828	173.673	37.0608	175.144	47.4965	173.547
31.3599	152.035	48.854	174.39	33.0987	171.113	35.3305	156.731	49.3516	174.432	57.7912	169.361	37.8464	167.893	48.6548	172.949	37.0629	174.45	47.4977	172.852
31.1948	151.252	49.0287	173.493	33.1003	170.255	35.3343	156.07	49.185	173.767	57.7932	168.67	37.6809	166.902	48.4871	172.111	36.8954	173.613	47.3294	172.014
31.3701	150.413	48.8624	172.829	32.9317	169.427	35.3392	155.081	49.1891	172.9	57.7959	167.808	37.5148	166.083	48.6597	171.216	36.8981	172.749	47.161	171.178
31.3757	149.443	49.0371	171.935	32.9327	168.742	35.1728	154.452	49.1932	172.035	57.7985	166.948	37.8593	165.179	48.4919	170.381	36.9008	171.887	47.333	170.285
31.0403	148.696	48.872	170.929	32.9348	167.718	35.1776	153.467	49.3676	171.143	57.6309	166.119	37.6932	164.364	48.4943	169.519	36.7333	171.055	47.1646	169.452
31.2156	147.862	49.0461	170.211	32.9358	167.036	35.182	152.649	49.2009	170.482	57.2931	165.321	37.5266	163.72	48.4967	168.659	36.9062	170.168	47.1664	168.592
31.0505	147.089	48.8803	169.381	32.9379	166.016	35.1863	151.832	49.2056	169.45	57.4659	164.437	37.7009	162.85	48.6693	167.772	36.7387	169.34	47.1682	167.733
31.056	146.128	48.7146	168.552	33.1091	165.309	35.1906	151.016	49.2091	168.764	57.2983	163.613	37.5348	162.04	48.5009	167.115	36.7408	168.655	46.9998	166.906
30.8909	145.358	48.8892	167.668	32.9404	164.491	35.1949	150.203	49.0436	167.766	57.3009	162.762	37.5389	161.202	48.5039	166.089	36.9143	167.602	47.1718	166.022
31.0661	144.532	48.8931	166.984	32.7718	163.675	35.0295	149.258	49.0471	167.082	57.3034	161.913	37.5435	160.2	48.5057	165.407	36.7462	166.949	47.0028	165.369
31.0711	143.737	48.7279	165.991	32.7733	162.832	35.0332	148.61	48.881	166.258	57.306	161.065	37.3768	159.562	48.5081	164.555	36.7488	166.099	47.0052	164.347
31.0767	142.785	48.7324	165.14	32.945	161.962	35.0381	147.641	49.0553	165.378	57.1378	160.418	37.5517	158.535	48.5105	163.705	36.7515	165.251	47.0064	163.667
30.9115	142.023	48.9064	164.432	32.7763	161.151	35.0423	146.835	49.0593	164.529	57.141	159.405	37.5558	157.705	48.5128	162.857	36.7542	164.404	46.8379	162.848
30.917	141.076	48.7406	163.614	32.7779	160.313	35.0466	146.031	48.8932	163.71	56.8031	158.621	37.7294	157.013	48.345	162.04	36.7568	163.559	46.8397	162.002
30.7518	140.318	48.5754	162.629	32.6091	159.506	35.0509	145.228	48.727	162.893	56.9759	157.751	37.3937	156.08	48.3473	161.196	36.7595	162.716	46.6712	161.187
30.7568	139.532	48.7495	161.925	32.7809	158.643	35.0557	144.268	48.7311	162.049	56.8082	156.942	37.3977	155.255	48.3497	160.353	36.7621	161.874	46.8432	160.315
30.5916	138.778	48.4135	161.141	32.6121	157.84	34.8897	143.498	48.9054	161.178	56.6405	156.134	37.4017	154.432	48.1818	159.541	36.5945	161.064	46.6747	159.503
30.7673	137.811	48.7583	160.243	32.6136	157.009	34.8939	142.702	48.9088	160.506	56.6431	155.299	37.4058	153.611	48.3543	158.673	36.5971	160.226	46.6765	158.664
30.6021	137.06	48.4223	159.463	32.7853	156.151	34.7285	141.777	48.7432	159.528	56.6456	154.466	37.4098	152.792	48.1865	157.865	36.5997	159.39	46.508	157.855
30.7773	136.253	48.4272	158.459	32.4464	155.382	34.7327	140.984	48.577	158.72	56.4779	153.663	37.2436	152.004	48.1888	157.029	36.4322	158.585	46.5097	157.02
30.7828	135.321	48.4316	157.625	32.4479	154.557	34.737	140.193	48.7513	157.856	56.3102	152.863	37.4179	151.159	48.1911	156.195	36.4348	157.752	46.3418	156.049
30.4473	134.606	48.4354	156.959	32.6201	153.54	34.7412	139.404	48.7553	157.023	56.4829	152.006	37.0814	150.404	48.0232	155.392	36.4374	156.922	46.3429	155.383
30.623	133.65	48.4398	156.127	32.4513	152.747	34.7459	138.459	48.5891	156.22	56.3158	151.044	37.2562	149.4	48.0255	154.562	36.6101	156.064	46.3452	154.387
30.4577	132.909	48.2745	155.162	32.4528	151.928	34.5799	137.703	48.5931	155.391	56.1481	150.249	37.2602	148.59	47.8576	153.763	36.2723	155.295	46.3463	153.725
30.4632	131.987	48.4485	154.47	32.4542	151.11	34.5841	136.919	48.5971	154.563	56.3208	149.398	37.2642	147.782	48.0301	152.907	36.2749	154.469	46.1784	152.762
30.2979	131.25	48.2832	153.509	32.4557	150.294	34.759	135.952	48.4315	153.601	55.9829	148.635	37.2682	146.976	48.0324	152.082	36.2775	153.646	46.0099	151.966
30.3033	130.333	48.2876	152.685	32.2869	149.508	34.4228	135.231	48.6057	152.747	55.9853	147.817	36.9318	146.23	48.0352	151.095	36.2801	152.824	46.352	151.085
30.4785	129.541	48.2919	151.863	32.2889	148.534	34.5972	134.424	48.4389	152.119	55.9884	146.837	37.2767	145.208	48.0375	150.274	36.2832	151.84	46.1834	150.294
30.4839	128.629	48.2962	151.043	32.1201	147.752	34.4317	133.522	48.4434	151.134	55.8201	146.214	37.1105	144.437	47.8696	149.483	36.2857	151.022	46.1851	149.474
29.9782	127.958	48.3005	150.225	32.2917	146.915	34.4358	132.748	48.6176	150.286	55.8231	145.238	37.1144	143.638	48.0415	148.8	36.2883	150.206	46.0166	148.686
30.324	126.991	48.1347	149.437	32.2931	146.108	34.4405	131.822	48.4513	149.498	55.6553	144.456	37.1184	142.841	47.8741	147.85	36.2908	149.392	46.0188	147.708
30.1592	126.115	48.139	148.623	32.2945	145.303	34.4452	130.898	48.2851	148.712	55.6578	143.647	36.9526	141.916	48.0465	147.007	36.1232	148.609	46.0199	147.057
29.9939	125.392	47.9736	147.676	32.1257	144.529	34.4493	130.13	48.4592	147.87	55.49	142.868	36.9566	141.122	47.8786	146.224	35.956	147.665	45.8519	146.111
30.1695	124.462	48.1481	146.836	32.2973	143.698	34.4534	129.364	48.293	147.087	55.493	141.901	36.9611	140.173	47.8808	145.414	36.1287	146.827	46.0237	145.272
30.0041	123.743	47.9822	146.056	32.129	142.768	34.1177	128.505	48.4671	146.248	55.4954	141.098	36.7948	139.413	47.883	144.606	36.1313	146.02	45.8551	144.493
30.0095	122.847	47.9865	145.249	32.3006	141.941	34.2925	127.561	48.1312	145.337	55.4978	140.296	36.9689	138.596	47.5454	143.696	36.1338	145.215	45.8573	143.526
29.8441	122.132	47.9908	144.443	32.1317	141.174	33.9562	126.86	48.1351	144.531	55.33	139.525	36.8026	137.84	47.888	142.833	35.9661	144.441	45.6887	142.751
29.6798	121.122	47.8254	143.508	32.1336	140.222	34.3013	125.892	48.4795	143.669	55.333	138.567	36.8071	136.899	47.72	142.06	35.9691	143.48	45.6903	141.948
29.8548	120.352	47.8297	142.707	32.135	139.43	34.3054	125.135	48.143	142.925	55.1652	137.8	36.6408	136.147	47.552	141.288	35.8014	142.709	45.5223	141.017
29.8597	119.614	48.0042	141.878	32.1364	138.64	34.1393	124.41	48.3176	141.935	54.9974	137.035	36.8149	135.337	47.3846	140.358	35.9741	141.883	45.5233	140.378
29.6953	118.612	47.8382	141.109	31.9675	137.881	33.9736	123.537	48.1513	141.166	55.0003	136.084	36.6491	134.433	47.557	139.532	35.9766	141.087	45.3552	139.451
29.7001	117.878	47.843	140.153	31.9694	136.937	33.9782	122.636	48.1552	140.369	55.0027	135.293	36.653	133.657	47.3889	138.765	35.8088	140.322	45.3568	138.656
29.5352	117.028	47.8472	139.359	31.801	136.025	33.9823	121.888	47.9889	139.604	54.8349	134.534	36.8276	132.699	47.5613	137.943	35.6416	139.401	45.3584	137.863
29.54	116.298	47.6818	138.438	31.6316	135.428	33.9869	120.992	47.9933	138.652	54.8378	133.59	36.6612	131.956	47.3938	137.022	35.8143	138.581	45.1903	136.942
29.5458	115.278	47.8557	137.776	31.9739	134.433	34.1617	120.07	47.827	137.89	54.8401	132.805	36.4954	131.06	47.5662	136.203	35.6466	137.822	45.3621	136.124
29.7208	114.523	47.6903	136.859	31.805	133.684	33.9955	119.357	48.0016	136.914	54.8425	132.022	36.4993	130.292	47.5684	135.415	35.6495	136.879	45.194	135.208
29.7261	113.654	47.6945	136.073	31.8063	132.907	33.8299	118.498	47.8347	136.314	54.505	131.143	36.5031	129.526	47.4008	134.501	35.8222	136.065	45.195	134.58
29.5607	112.961	47.8689	135.258	31.6379	132.006	33.8344	117.612	47.8391	135.371	54.5078	130.208	36.5075	128.608	47.5732	133.688	35.4842	135.341	45.1971	133.639
29.3957	112.126	47.5332	134.377	31.6397	131.078	33.6682	116.905	47.6727	134.617	54.5102	129.431	36.6815	127.816	47.4057	132.779	35.6574	134.375	45.3688	132.828
29.2313	111.15	47.7076	133.567	31.641	130.308	33.6728	116.024	47.8473	133.65	54.3423	128.685	36.5157	126.933	47.2376	132.028	35.6603	133.44	45.2007	131.922
29.4062	110.405	47.5421	132.662	31.6423	129.538	33.8475	115.116	47.681	132.9	54.3451	127.757	36.3498	126.052	47.4099	131.221	35.4926	132.693	45.2022	131.144
29.4115	109.549	47.5463	131.885	31.6441	128.618	33.8515	114.386	47.6848	132.122	54.0076	126.89	36.3536	125.295	47.4126	130.289	35.495	131.918	45.0341	130.242
29.4167	108.695	47.5505	131.109	31.6453	127.853	33.5156	113.57	47.6891	131.191	54.0099	126.121	36.3574	124.541	47.4147	129.515	35.6676	131.116	45.0356	129.468
29.2517	107.872	47.5552	130.181	31.4769	126.966	33.6903	112.67	47.5233	130.292	54.1824	125.325	36.3618	123.637	47.2466	128.771	35.5003	130.22	44.8674	128.571
29.0867	107.053	47.5594	129.41	31.6484	126.176	33.5245	111.83	47.6973	129.491	54.015	124.436	36.1959	122.766	47.079	127.876	35.333	129.326	45.0391	127.772
29.0919	106.207	47.7337	128.611	31.4799	125.294	33.3588	110.994	47.3607	128.779	53.8471	123.701	36.1996	122.017	47.0816	126.954	35.3354	128.559	44.8704	127.032
28.9269	105.392	47.2283	127.624	31.4811	124.536	33.5335	110.101	47.1948	127.887	53.8499	122.788	36.0337	121.15	47.2539	126.158	35.508	127.765	44.8724	126.113
29.1023	104.522	47.4027	126.83	31.3127	123.659	33.3673	109.412	47.3693	126.939	53.8522	122.028	36.2082	120.227	47.256	125.393	35.5108	126.849	44.8739	125.349
28.767	103.742	47.4068	126.066	31.3139	122.906	33.3717	108.553	47.2029	126.204	53.855	121.119	36.0418	119.514	47.0884	124.507	35.5132	126.088	44.8759	124.434
28.7722	102.906	47.4115	125.152	31.3156	122.004	33.3762	107.697	47.3769	125.413	53.6875	120.242	36.046	118.625	47.0905	123.746	35.1757	125.235	44.7072	123.702
28.6076	101.963	47.2454	124.422	31.3174	121.105	33.0402	106.902	47.2109	124.53	53.3494	119.547	36.0503	117.739	47.093	122.836	35.1785	124.327	44.8793	122.763
28.6123	101.27	47.4202	123.484	31.3186	120.357	33.2148	106.021	47.2152	123.62	53.3521	118.645	36.054	117.002	47.0951	122.079	35.0107	123.601	44.5404	122.065
28.7876	100.413	47.2541	122.757	31.1501	119.492	33.049	105.202	47.219	122.864	53.3549	117.746	36.0583	116.121	46.9274	121.202	35.1832	122.818	44.5423	121.16
28.4524	99.6455	47.0885	121.882	31.322	118.571	33.2236	104.326	47.2227	122.11	53.1869	117.028	36.0625	115.242	46.93	120.299	35.186	121.916	44.5443	120.257
28.458	98.6853	47.0932	120.98	31.1529	117.859	33.0578	103.512	47.0568	121.236	53.1897	116.133	35.8965	114.395	46.7618	119.577	35.1889	121.017	44.3755	119.535
28.4631	97.865	47.0967	120.38	31.3248	116.942	33.0622	102.671	46.8908	120.365	53.1924	115.241	35.9003	113.666	46.7644	118.679	35.1912	120.269	44.3775	118.637
28.1277	97.106	46.9316	119.362	31.1563	116.087	32.8969	101.723	47.0647	119.588	53.0244	114.529	36.0747	112.765	46.7664	117.932	35.194	119.375	44.3794	117.742
28.1333	96.1552	46.9357	118.617	31.1575	115.351	32.9008	101.026	46.8988	118.722	52.8569	113.671	35.9082	112.07	46.9391	117.008	35.0266	118.512	44.3808	116.997
28.3086	95.3137	46.9403	117.724	30.9889	114.501	33.0753	100.164	46.7328	117.858	52.8596	112.786	35.9129	111.059	46.7714	116.146	35.0289	117.771	44.2125	116.136
28.1435	94.5335	46.9449	116.834	30.9905	113.623	33.0797	99.3328	46.9067	117.087	52.6921	111.934	35.7463	110.368	46.9436	115.376	35.0317	116.884	44.2144	115.247
28.1485	93.7264	46.9489	116.095	30.9922	112.748	32.9138	98.534	47.0811	116.169	52.6948	111.054	35.9207	109.476	46.7759	114.519	34.8643	116.028	44.2158	114.509
27.9834	92.9513	46.7833	115.239	30.9933	112.021	32.7484	97.6004	46.7449	115.342	52.3565	110.382	35.7547	108.646	46.7784	113.635	35.0367	115.264	44.2177	113.625
27.9889	92.016	46.958	114.327	30.9949	111.151	32.9225	96.8853	46.5789	114.488	52.3592	109.507	35.7589	107.79	46.6102	112.929	35.0395	114.384	44.2196	112.744
27.8237	91.2464	46.7918	113.622	30.8263	110.313	32.7566	96.0942	46.7528	113.725	52.1917	108.664	35.763	106.935	46.7829	112.02	34.8716	113.681	43.8805	112.07
27.659	90.347	46.7964	112.744	30.9981	109.418	32.7614	95.1402	46.5867	112.876	52.1943	107.794	35.5969	106.113	46.6151	111.173	34.8743	112.806	44.0526	111.165
27.8342	89.5242	46.8009	111.869	30.8295	108.585	32.9354	94.4315	46.7606	112.116	52.3672	106.897	35.7713	105.234	46.6171	110.444	34.8771	111.933	43.7141	110.349
27.4993	88.6606	46.6352	111.025	30.8306	107.868	32.77	93.5128	46.5945	111.272	52.0294	106.091	35.6052	104.417	46.6195	109.572	34.7096	111.093	43.8861	109.449
27.5043	87.8728	46.6397	110.155	30.8322	107.011	32.4338	92.7618	46.5987	110.401	51.8618	105.259	35.4391	103.603	46.6219	108.702	35.0527	110.166	43.8875	108.725
27.3391	87.117	46.6437	109.432	30.6636	106.185	32.4381	91.9545	46.2624	109.591	51.8644	104.399	35.4432	102.761	46.4542	107.865	34.715	109.36	43.7196	107.743
27.3445	86.204	46.6482	108.566	30.8353	105.303	32.613	90.9866	46.2666	108.725	51.6968	103.572	35.617	102.033	46.4566	107	34.5475	108.527	43.7209	107.023
27.1792	85.4537	46.4825	107.732	30.6667	104.482	32.6173	90.1849	46.4409	107.832	51.5292	102.747	35.6216	101.057	46.459	106.138	34.7199	107.781	43.5525	106.191
27.3549	84.5179	46.4869	106.872	30.498	103.664	32.4518	89.2822	46.1046	107.03	51.5318	101.895	35.455	100.391	46.4614	105.279	34.5524	106.952	43.7245	105.303
27.1896	83.7732	46.4914	106.014	30.5001	102.678	32.2858	88.5154	46.2789	106.142	51.5339	101.187	35.4591	99.5594	46.2931	104.594	34.5551	106.097	43.3859	104.505
27.195	82.8732	46.3252	105.33	30.5011	101.976	32.29	87.7219	46.1128	105.316	51.1965	100.258	35.4636	98.5924	46.2955	103.739	34.5578	105.244	43.5579	103.622
27.0301	82.0062	46.1599	104.364	30.5026	101.137	32.4645	86.9014	45.9466	104.492	51.1991	99.4137	35.4676	97.7663	46.2984	102.745	34.5605	104.394	43.5597	102.771
27.2053	81.2111	46.5042	103.597	30.5041	100.299	32.2989	86.0112	45.9507	103.641	51.2012	98.7122	35.4717	96.9428	46.3002	102.038	34.5631	103.547	43.3912	101.952
27.04	80.4775	46.3385	102.778	30.3354	99.4939	32.4733	85.1963	45.9548	102.793	51.034	97.7626	35.3055	96.1513	46.3026	101.191	34.5658	102.702	43.393	101.106
26.8751	79.6199	46.3429	101.933	30.5071	98.6324	32.3077	84.3126	45.7886	101.977	51.0365	96.9262	35.1393	95.3623	46.305	100.346	34.3982	101.888	43.3947	100.262
26.7107	78.6399	46.3473	101.09	30.1682	97.8615	32.1422	83.4323	45.7927	101.134	50.8689	96.1217	35.1434	94.5464	45.9669	99.5631	34.4008	101.049	43.396	99.561
26.5453	77.9153	46.1815	100.279	30.3399	97.0051	32.1459	82.7847	45.7963	100.433	50.7012	95.3198	35.1478	93.5979	46.3096	98.6651	34.4034	100.211	43.228	98.612
26.5507	77.0387	46.1859	99.4409	30.1716	96.0729	32.3207	81.8516	45.8003	99.595	50.5335	94.5205	35.1518	92.7876	46.1418	97.8578	34.4061	99.3765	43.0595	97.8055
26.5559	76.1657	46.1903	98.6057	30.3428	95.3588	32.1551	80.9808	45.6346	98.6496	50.536	93.6944	35.1558	91.98	46.1441	97.0236	34.2385	98.5737	43.2315	96.9429
26.391	75.3256	46.0244	97.8023	30.3442	94.5394	31.989	80.2414	45.6381	97.9556	50.3687	92.7632	34.9896	91.2042	45.9762	96.2214	34.0708	97.7735	42.8927	96.171
26.2257	74.6125	46.199	96.9428	30.3462	93.5867	31.9936	79.3477	45.4724	97.0162	50.3712	91.9426	35.1642	90.2387	45.9785	95.3924	34.2436	96.9171	42.8944	95.3428
26.4011	73.7199	46.0336	96.0069	30.0072	92.8317	31.9982	78.4575	45.6466	96.1592	50.2035	91.154	34.998	89.4685	45.9808	94.5659	33.9063	96.0141	42.7259	94.5466
26.2362	72.8898	46.038	95.1823	30.1788	91.9911	31.8321	77.7266	45.4804	95.3636	50.206	90.3386	35.1722	88.6421	46.1533	93.7127	34.2488	95.2707	42.7281	93.5867
26.2414	72.0336	46.212	94.4677	30.01	91.2118	31.8366	76.8429	45.4844	94.5411	50.0382	89.5551	34.8357	87.9064	45.9858	92.7841	34.0811	94.4807	42.8999	92.7373
26.0764	71.2105	45.8764	93.5702	30.1821	90.2422	31.8411	75.9626	45.1479	93.78	49.8709	88.6394	34.8401	86.9828	45.8178	91.9951	33.9139	93.5574	42.9016	91.9199
26.0816	70.3614	45.8807	92.7532	30.0132	89.4685	31.675	75.2403	45.1524	92.8267	49.8734	87.8321	35.0142	86.1645	45.8201	91.1793	34.0867	92.7142	42.7331	91.1344
25.9166	69.5452	45.7148	91.9683	30.1848	88.6385	32.0199	74.3076	45.1563	92.0123	49.8758	87.0273	34.8479	85.4076	45.8223	90.3661	34.0892	91.9029	42.565	90.2163
25.7516	68.7325	45.7196	91.0215	29.8458	87.8993	31.684	73.4962	45.1603	91.2006	49.7085	86.1211	34.8523	84.4934	45.6544	89.5849	34.0917	91.0942	42.3959	89.5711
25.7568	67.8938	45.8941	90.1833	29.8476	86.9715	31.6881	72.753	45.1642	90.3914	49.5407	85.3513	34.8562	83.7126	45.4868	88.6717	33.7543	90.2128	42.2278	88.659
25.5917	67.0881	45.7282	89.4064	29.6788	86.2085	31.6925	71.8892	44.8282	89.5093	49.7133	84.5253	34.8605	82.8049	45.6593	87.8372	33.7568	89.4097	42.3996	87.8254
25.4271	66.1674	45.7325	88.6028	29.6806	85.2872	31.697	71.0288	44.8321	88.7057	49.3757	83.6579	34.6946	81.9301	45.6615	87.0347	33.7597	88.4759	42.231	87.0532
25.6024	65.3102	45.567	87.6978	29.8521	84.4709	31.5312	70.2015	44.836	87.9046	49.2083	82.7647	34.6985	81.1579	45.6637	86.2348	33.592	87.7078	42.4033	86.0918
25.2671	64.545	45.5712	86.8997	29.6837	83.5856	31.5356	69.3481	44.6701	87.0026	49.0405	82.006	34.873	80.2307	45.4957	85.4668	33.9345	86.9863	42.4049	85.2957
25.2722	63.7242	45.5759	85.9718	29.685	82.8042	31.5401	68.4982	44.674	86.2071	49.2135	81.0604	34.7066	79.4934	45.4983	84.5397	33.597	86.1203	42.066	84.561
25.1071	62.9365	45.5797	85.3112	29.6867	81.8959	31.3743	67.6813	44.6779	85.4141	48.8755	80.3367	34.5407	78.6316	45.3303	83.7772	33.5999	85.199	42.0681	83.6384
24.942	62.1522	45.4142	84.4187	29.5178	81.1495	31.3787	66.8384	44.512	84.5216	49.0485	79.3976	34.7147	77.841	45.3329	82.8567	33.6023	84.4121	42.0696	82.8505
25.1177	61.1969	45.4189	83.5002	29.6893	80.3469	31.383	65.999	44.3457	83.7636	48.8806	78.6501	34.5488	76.9857	45.335	82.0704	33.435	83.5267	41.9014	81.9638
24.9525	60.4202	45.4231	82.7158	29.5208	79.4775	31.2172	65.1925	44.35	82.8482	48.7131	77.7763	34.553	76.1044	45.3376	81.1563	33.6076	82.716	41.7332	81.0807
24.7878	59.5325	45.4273	81.9339	29.3524	78.6115	31.2216	64.3601	44.3538	82.0664	48.5457	76.906	34.3866	75.3812	45.3398	80.3755	33.6101	81.9372	41.7347	80.3013
24.623	58.6494	45.2617	81.0544	29.5238	77.8174	31.0561	63.4425	44.5283	81.128	48.3778	76.167	34.3908	74.5064	45.1721	79.4973	33.4427	81.0613	41.7367	79.3952
24.4578	57.8841	45.2659	80.2781	29.3553	76.958	31.06	62.7352	44.0215	80.44	48.2103	75.3032	34.395	73.6351	45.1742	78.7221	33.2749	80.3174	41.7382	78.6213
24.4628	57.0927	45.2701	79.5043	29.3565	76.1988	31.0644	61.9132	44.196	79.5081	48.2126	74.5404	34.3988	72.891	45.1768	77.821	33.4479	79.3892	41.5699	77.7512
24.298	56.2221	45.1045	78.6342	29.3582	75.3164	30.8989	61.0076	43.8598	78.668	48.2153	73.6536	34.2328	72.0556	45.1789	77.0514	33.4503	78.6215	41.5714	76.9828
24.303	55.4382	45.1091	77.7383	29.3599	74.4375	31.0734	60.1635	43.8636	77.9003	47.8776	72.8293	34.237	71.1943	45.0112	76.1861	33.1127	77.788	41.5734	76.0897
24.1381	54.5762	45.1136	76.8457	29.1913	73.5915	31.0777	59.3525	43.698	76.91	47.8803	71.9495	34.2411	70.3364	45.0133	75.4221	33.1151	77.0258	41.4046	75.3564
23.9733	53.7187	45.1178	76.0835	29.1925	72.8439	30.9117	58.5745	43.5316	76.1777	47.883	71.0732	34.2453	69.482	44.8456	74.5633	33.1183	76.0137	41.4065	74.4698
23.9786	52.8362	44.9521	75.2269	29.1941	71.975	30.7462	57.6854	43.5354	75.4185	47.5452	70.2594	34.2494	68.6311	44.8481	73.6786	33.4611	75.1986	41.408	73.7126
23.8133	52.0973	44.9562	74.4703	29.1957	71.1095	30.9206	56.8558	43.5396	74.536	47.3776	69.4195	34.2535	67.7837	44.8501	72.9231	32.9532	74.408	41.4099	72.8324
23.8186	51.2234	44.7906	73.6202	29.0267	70.3999	30.7547	56.0888	43.3735	73.6864	47.3803	68.5537	34.2576	66.9398	44.8526	72.0449	32.9555	73.6574	41.2415	71.9852
23.8235	50.4624	44.7951	72.7441	29.1985	69.5114	30.5891	55.2122	43.3773	72.9357	47.2123	67.8439	34.0915	66.1288	44.6848	71.1996	32.9583	72.785	41.0732	71.1415
23.6589	49.5187	44.629	72.0255	29.0298	68.6854	30.9337	54.364	43.2112	72.0927	47.2149	66.9845	34.0956	65.2919	44.6873	70.3284	33.1312	71.8866	41.2452	70.2423
23.494	48.688	44.8037	71.1264	28.8612	67.8629	30.7681	53.496	43.0451	71.2531	47.0473	66.1582	33.7593	64.5174	44.6893	69.5844	33.1339	71.0211	41.0764	69.5291
23.329	47.8619	44.9784	70.2308	28.8627	67.0143	30.4322	52.6621	43.0493	70.3875	46.7095	65.3648	33.7634	63.6874	44.5215	68.7491	32.7962	70.218	40.908	68.6954
23.3339	47.1168	44.4722	69.4566	28.8643	66.1693	30.4364	51.8845	43.0534	69.5255	46.712	64.516	33.9376	62.8314	44.3537	67.9173	32.9687	69.4525	40.9098	67.8357
23.3394	46.1641	44.6469	68.5681	28.6956	65.3572	30.4409	51	42.7171	68.7258	46.5444	63.7001	33.9417	62.0084	44.1859	67.089	32.9714	68.597	40.7414	67.0089
23.0038	45.4862	44.6513	67.7124	28.6971	64.5192	30.4455	50.1201	42.551	67.9002	46.3768	62.8877	33.7759	61.1016	44.1883	66.2347	32.8038	67.7744	40.7432	66.1562
22.8392	44.5733	44.4856	66.8898	28.6986	63.6846	30.4496	49.3539	42.555	67.0486	46.2091	62.0788	33.7799	60.2861	44.1906	65.3839	32.6363	66.9554	40.745	65.3069
22.8443	43.7403	44.49	66.0411	28.5303	62.7646	30.2839	48.5121	42.5591	66.2005	46.0418	61.1545	33.7839	59.4741	44.193	64.5366	32.8092	66.0808	40.9169	64.4316
22.6796	42.8383	44.6646	65.1665	28.7016	62.0259	30.2884	47.6452	42.3929	65.3854	45.8741	60.3531	33.7879	58.6655	44.1953	63.6928	32.8118	65.2392	40.7485	63.6189
22.5145	42.0446	44.4984	64.4743	28.5332	61.1139	29.952	46.9497	42.2268	64.5737	45.877	59.4078	33.4519	57.8048	44.1977	62.8525	32.6442	64.4307	40.58	62.8096
22.3494	41.2555	44.333	63.5456	28.7049	60.2642	30.1267	46.0618	42.0606	63.7656	45.7089	58.7313	33.4558	57.0037	44.0298	62.0451	32.4766	63.6256	40.4115	62.0038
22.1846	40.3695	44.3374	62.7109	28.5361	59.4771	30.3013	45.1785	42.0646	62.9314	45.3714	57.853	33.4598	56.2061	43.8619	61.2413	32.6494	62.765	40.243	61.2015
22.1897	39.5604	44.3418	61.8797	28.5375	58.6639	30.1355	44.3589	42.0686	62.1008	45.2037	57.0661	33.4641	55.2989	43.6944	60.3227	32.652	61.9374	40.2447	60.3732
21.8547	38.715	44.5159	61.1405	28.3687	57.8838	29.9697	43.5439	41.9028	61.1852	45.2065	56.1373	33.468	54.5087	43.6963	59.6146	32.4848	61.0253	40.2464	59.5483
21.8597	37.9156	44.3505	60.2277	28.3705	56.9627	29.9741	42.7038	41.7366	60.3916	45.0391	55.2426	33.3021	53.6395	43.3586	58.7335	32.4873	60.2052	40.2485	58.6099
21.6949	37.0514	44.1846	59.4365	28.5421	56.131	29.8083	41.8979	41.5704	59.6014	44.8714	54.4671	33.4763	52.8274	43.531	57.8851	32.3197	59.418	40.2501	57.7926
21.8701	36.232	44.3591	58.5897	28.3733	55.3618	29.9828	41.0374	41.5747	58.6688	44.8738	53.6657	33.4805	51.9372	43.3631	57.0992	32.152	58.6344	40.2518	56.9787
21.535	35.4083	44.1932	57.8055	28.3747	54.5666	29.8173	40.1376	41.4085	57.8862	44.7064	52.7835	33.3142	51.1915	43.1955	56.2011	32.3248	57.7952	39.7428	56.2569
21.5403	34.5311	44.0277	56.9092	28.5466	53.6325	29.6514	39.3459	41.2426	56.9917	44.5386	52.0191	33.3184	50.3099	43.1977	55.3932	32.3277	56.8741	40.0853	55.276
21.5456	33.6597	44.032	56.1029	28.2079	52.7916	29.6558	38.5292	41.2465	56.187	44.3711	51.1455	32.9822	49.4919	43.0301	54.5036	32.3302	56.0719	39.9167	54.5026
21.3803	32.9196	44.0363	55.3001	28.2093	52.0078	29.66	37.717	41.2504	55.3857	44.0334	50.306	32.9864	48.6194	43.0323	53.7032	32.333	55.1594	39.9186	53.5893
21.2154	32.0887	43.8707	54.4165	28.211	51.1164	29.4941	36.939	40.7441	54.5629	43.866	49.4415	33.1605	47.8301	42.8647	52.8222	32.1649	54.5075	39.75	52.8234
21.0504	31.2635	43.7051	53.5373	28.042	50.3697	29.4987	36.0359	40.7483	53.656	43.6981	48.6926	32.9945	46.9957	42.6967	52.0588	31.9976	53.6325	39.4112	52.0906
21.0559	30.3205	43.7094	52.746	28.0437	49.4867	29.5029	35.238	40.7522	52.8662	43.5306	47.8366	32.9986	46.1362	42.529	51.1864	32.0004	52.7325	39.5833	51.1602
20.8909	29.5076	43.8838	51.9286	28.0454	48.6084	29.5075	34.3458	40.5859	52.1095	43.3631	46.9853	33.0028	45.2813	42.5312	50.4009	32.1731	51.9192	39.5853	50.264
20.7259	28.7004	43.548	51.0916	28.0466	47.8435	29.3419	33.4889	40.4199	51.2447	43.1955	46.1385	32.8364	44.5666	42.3635	49.537	31.8354	51.0868	39.4166	49.513
20.5611	27.807	43.7224	50.2816	27.878	47.0033	29.346	32.7058	40.2539	50.3844	42.8578	45.3259	32.8405	43.7203	42.3656	48.759	31.8378	50.3105	39.4185	48.6253
20.5659	27.0736	43.7269	49.394	27.8796	46.138	29.3502	31.9272	40.0879	49.5287	42.52	44.5178	32.8449	42.7736	42.0277	47.9333	31.8406	49.4276	39.42	47.8524
20.2309	26.2227	43.5613	48.5406	27.8812	45.2773	29.1845	31.0864	40.0917	48.7579	42.0124	43.6364	32.6788	41.9665	42.0301	47.0529	32.0136	48.5197	39.0815	47.0323
20.0658	25.4392	43.3952	47.8012	27.7126	44.4508	29.0191	30.1556	39.7554	47.9403	41.6746	42.838	32.6829	41.1344	41.6922	46.2363	31.6756	47.814	39.0833	46.1577
20.0712	24.5424	43.5699	46.8971	27.7138	43.7054	29.0232	29.3924	39.5894	47.0978	41.3368	42.0442	32.687	40.3068	41.5244	45.3947	31.6783	46.9441	39.0848	45.3962
19.9063	23.6825	43.234	46.0863	27.7153	42.8578	29.0276	28.5392	39.7637	46.2006	40.8291	41.1789	32.3506	39.543	41.5268	44.5281	31.681	46.0789	38.9168	44.4518
19.7411	22.9176	43.4087	45.1914	27.5467	42.0443	28.8622	27.6277	39.4274	45.3967	40.3214	40.3193	32.695	38.6653	41.5293	43.666	31.6837	45.2182	38.9186	43.5909
19.7464	22.0415	43.2426	44.4675	27.3783	41.1309	28.8662	26.8799	39.2613	44.5679	40.1537	39.5108	32.5288	37.8811	41.3614	42.838	31.6864	44.362	38.92	42.8413
19.4113	21.2319	43.2474	43.5039	27.55	40.2679	28.7004	26.0737	39.0952	43.7436	39.8162	38.6325	32.5332	36.9709	41.0234	42.0442	31.5185	43.6462	38.5814	42.0481
19.4165	20.3699	43.0813	42.788	27.5515	39.4391	28.7051	25.1517	38.929	42.9238	39.1378	37.9225	32.3669	36.1963	40.8556	41.2254	31.5215	42.6929	38.5832	41.2003
19.2513	19.63	43.2559	41.9106	27.553	38.6148	28.5392	24.3577	38.7629	42.1086	38.6304	36.9823	32.0308	35.3562	40.5175	40.4408	31.3536	41.9851	38.5853	40.2519
19.0866	18.7269	43.0902	41.0971	27.5541	37.8973	28.5438	23.4492	38.7673	41.1637	37.9524	36.1806	32.0348	34.5617	40.35	39.5265	31.1863	41.0717	38.5866	39.5183
18.7516	17.8621	43.0945	40.2584	27.3856	37.0095	28.2077	22.697	38.6011	40.3582	37.4445	35.3551	32.2092	33.6436	40.1821	38.7219	31.3592	40.2087	38.4181	38.7138
18.7568	17.0294	42.9287	39.454	27.2172	36.1276	28.212	21.8913	38.2647	39.5868	37.2771	34.4762	32.2135	32.761	40.0142	37.9219	31.3618	39.3799	38.4202	37.7808
18.592	16.1514	42.7632	38.5507	27.3888	35.2925	28.3867	20.973	38.0988	38.6875	36.4288	33.7216	32.2174	31.9812	40.0168	36.9941	31.1941	38.5852	38.2517	36.9859
18.2566	15.393	42.5974	37.7559	27.22	34.5212	28.0505	20.2388	37.9326	37.8963	35.9213	32.8141	32.0514	31.1391	39.5085	36.263	31.1967	37.7655	38.0832	36.1956
18.2617	14.5823	42.7719	36.9065	27.2217	33.6256	28.2252	19.3341	37.7664	37.1096	35.4134	32.0125	31.8854	30.3028	39.3408	35.3757	31.0294	36.8784	37.9149	35.3083
18.0968	13.7286	42.7762	36.0912	27.0528	32.864	28.0595	18.4959	37.7706	36.1967	35.4161	31.1276	31.8892	29.5378	39.1729	34.5951	31.0319	36.0683	38.0868	34.4685
17.9319	12.8834	42.7805	35.2805	26.8843	32.0089	27.8935	17.7506	37.6044	35.4197	34.5677	30.3968	31.8934	28.6827	39.0052	33.7187	31.2046	35.2332	37.748	33.7221
17.5968	12.0766	42.4447	34.4332	26.886	31.13	27.8979	16.8962	37.4384	34.5473	34.2303	29.4862	31.7276	27.769	39.0074	32.9181	31.0369	34.4619	37.7499	32.8211
17.4318	11.2486	42.449	33.6322	26.8873	30.3535	27.9023	16.0489	37.2721	33.78	33.7223	28.7083	31.7314	27.0194	38.6695	32.0822	30.8695	33.5959	37.7515	32.0251
17.0966	10.459	42.4536	32.7364	26.8889	29.4855	27.7368	15.1548	36.9359	32.9482	33.3848	27.8112	31.5653	26.2113	38.672	31.1928	30.872	32.8047	37.5832	31.1647
16.9318	9.57235	42.2876	31.9747	26.8901	28.7187	27.4007	14.382	36.9401	32.0628	32.7069	26.9806	31.5694	25.3792	38.3341	30.3685	30.8748	31.92	37.5851	30.2804
16.767	8.6959	42.4624	31.0603	26.7218	27.7963	27.405	13.5568	36.774	31.2129	32.1989	26.2213	31.5734	24.5529	37.9958	29.6472	30.7073	31.0707	37.4164	29.5289
16.4317	7.93374	42.2964	30.3082	26.5532	26.9752	27.2394	12.687	36.4378	30.3984	31.6911	25.3746	31.4075	23.6713	37.6582	28.7372	30.7097	30.2942	37.4183	28.6555
16.2669	7.07693	42.3009	29.4343	26.5547	26.1302	27.4139	11.847	36.1015	29.5896	31.3536	24.5053	31.4115	22.8572	37.4904	27.9005	30.5422	29.4558	37.2499	27.8176
15.932	6.18758	42.1352	28.5958	26.5562	25.291	27.248	11.0736	36.1056	28.7274	30.6755	23.7026	31.2456	21.989	37.1524	27.0993	30.545	28.5935	37.2518	26.9557
15.7668	5.42383	42.1396	27.7334	26.5574	24.5499	27.2525	10.1983	36.1097	27.8709	30.5081	22.8179	31.0794	21.2168	36.8143	26.3039	30.7175	27.8022	37.0833	26.1293
15.2616	4.58648	41.8037	26.9361	26.2188	23.6892	27.2569	9.33166	35.9436	27.0498	30.1702	22.0604	31.0836	20.3325	36.4766	25.4202	30.5503	26.8862	36.9149	25.3087
14.5865	3.7211	41.8081	26.0852	26.3905	22.8376	27.2611	8.55127	35.6072	26.2642	30.0027	21.1893	31.0879	19.4553	36.3088	24.6073	30.553	26.0412	36.7464	24.4938
13.9112	2.86969	41.8122	25.3337	26.2217	22.0511	26.9254	7.68371	35.441	25.4546	29.3249	20.3254	30.9216	18.7016	35.971	23.7372	30.5553	25.2949	36.9184	23.6253
12.8953	2.15971	41.6467	24.4304	26.2234	21.151	26.7596	6.87266	35.2752	24.5586	28.817	19.5286	31.096	17.8082	35.8031	22.9365	30.2175	24.5202	36.7499	22.822
12.7279	2.05384	41.3107	23.6562	26.395	20.3173	26.7639	6.04046	35.2792	23.7316	28.6495	18.6796	31.1001	16.9517	35.295	22.1097	30.2204	23.6001	36.7516	21.9948
--	--	41.3154	22.7368	25.8861	19.5198	26.5981	5.24663	34.9427	22.9697	27.9716	17.8401	30.7638	16.1617	34.4469	21.2588	30.2229	22.7782	36.4132	21.1417
12.39	2.04571	41.4896	21.9767	25.8877	18.6404	26.4324	4.38776	34.7768	22.0936	27.6338	17.0357	30.7679	15.3194	33.9391	20.3573	30.3957	21.9323	36.2446	20.3563
		41.324	21.0998	25.8891	17.855	26.2667	3.53913	34.6108	21.2247	27.2963	16.1532	30.6018	14.5139	33.2608	19.583	30.0581	21.0916	36.2465	19.4575
		41.1581	20.3196	25.8907	16.989	25.9308	2.73054	34.6147	20.422	26.7885	15.3091	30.4359	13.6331	32.5824	18.8158	30.2308	20.2579	36.078	18.6843
		41.1627	19.4265	25.5518	16.1896	25.935	1.94374	34.2785	19.5963	26.2807	14.4736	30.44	12.8128	32.2451	17.8215	29.8932	19.4307	35.9096	17.8286
		40.997	18.5703	25.7236	15.3082	25.7668	1.8314	34.1125	18.748	25.9431	13.6169	30.2738	12.0294	31.9068	17.0973	29.7258	18.581	35.9115	16.9504
		40.831	17.8087	25.5549	14.4934	--	--	33.7762	17.9365	25.435	12.8808	30.1078	11.1729	31.2286	16.2663	29.8984	17.7658	35.7428	16.1958
		41.0058	16.9065	25.3862	13.6856	25.9383	1.87264	33.7803	17.0728	25.2675	12.011	29.9418	10.3251	30.8909	15.3845	29.9011	16.8999	35.5745	15.3608
		40.6698	16.1006	25.2178	12.8024			33.6142	16.2459	24.7596	11.2092	29.7756	9.56444	30.0425	14.6005	29.7333	16.1563	35.4061	14.533
		40.5041	15.2721	25.3892	12.0321			33.2781	15.3712	24.252	10.3362	29.2694	8.71465	29.3646	13.7119	29.736	15.3039	35.4078	13.6825
		40.3383	14.4508	25.3909	11.1347			32.9418	14.589	23.9142	9.52276	28.9334	7.84537	28.8563	12.9693	29.5684	14.4883	35.2396	12.785
		40.3427	13.6068	25.2221	10.3562			32.7756	13.7842	23.4065	8.6695	28.4271	7.01612	28.3482	12.1517	29.4011	13.5965	35.0709	12.0624
		40.1769	12.7997	25.0535	9.50503			32.6097	12.9041	23.0687	7.87406	27.7506	6.22689	27.5002	11.2399	29.4037	12.7661	34.9027	11.1805
		40.0113	11.9171	25.0552	8.63275			32.2732	12.144	22.5609	7.04048	27.2445	5.3438	26.8222	10.3907	29.5765	11.9131	34.7344	10.3072
		40.0157	11.0952	24.7161	7.90674			32.4476	11.2209	21.8831	6.17134	26.398	4.53231	26.4839	9.65113	29.2386	11.1565	34.736	9.49381
		39.8501	10.2291	24.7176	7.0509			32.2816	10.3659	21.5452	5.40413	25.3812	3.76265	25.976	8.79096	29.2414	10.267	34.5675	8.71724
		39.8543	9.42211	24.7192	6.20368			31.6049	9.60873	21.0373	4.60135	24.5348	2.90376	25.2979	7.97082	29.074	9.4158	34.5693	7.83851
		39.6884	8.65202	24.3805	5.34877			31.4391	8.69254	20.3596	3.69265	23.5179	2.15917	24.6197	7.16096	29.0765	8.62245	34.2308	7.0279
		39.5227	7.81017	24.5522	4.48979			31.273	7.86418	19.8519	2.84009	22.8393	1.99665	23.7717	6.23903	28.9087	7.86597	34.0624	6.19616
		39.1868	7.00669	24.3835	3.69894			30.9364	7.15107	19.1737	2.10047	--	--	23.2637	5.42166	28.9117	6.93188	33.8939	5.37303
		39.0213	6.10484	24.045	2.79978			30.7705	6.26308	19.0036	1.98812	22.8405	1.99665	22.5853	4.64434	28.9143	6.08464	33.7257	4.4822
		39.0257	5.25987	23.7057	2.13005			30.0942	5.39947	--	--			21.9073	3.80391	28.7467	5.27577	33.3873	3.63139
		38.6896	4.48304	23.7049	1.98505			29.758	4.56262	18.6629	2.04769			21.0591	2.93293	28.9195	4.41598	33.0486	2.86546
		38.524	3.61025	--	--			29.4218	3.73603					20.3807	2.189	28.4115	3.68388	32.88	2.07838
		38.1882	2.77748	23.7035	1.98505			28.7454	2.90672					20.0405	2.0344	28.4143	2.79762	32.8794	1.93079
		37.8521	2.02808					28.0687	2.16107					--	--	28.4168	1.99422	--	--
		37.5137	1.94148					27.7301	2.00604					20.04	2.0344	28.2468	1.87885	32.5379	1.99033
		--	--					--	--							--	--
		37.3453	1.89828					27.7313	2.00604							28.4166	1.92161

## Sheet: Fig.2-Hardness of S1
File		H(GPa)
al-1-position 1		2.36297
al-1-position 2		1.41595
al-1-position 3		2.25103
al-1-position 4		2.07275
al-1-position 5		1.41631
al-1-position 6		1.22065
al-1-position 7		1.91825
al-1-position 8		1.40042
al-1-position 9		1.97847
al-1-position 10		1.535

## Sheet: Fig.2-Sample 2
al-2-position 1		al-2-position 2		al-2-position 3		al-2-position 4		al-2-position 5		al-2-position 6		al-2-position 7		al-2-position 8		al-2-position 9		al-2-position 10		al-2-position 11		al-2-position 12
Depth (nm)	Load (μN)	Depth (nm)	Load (μN)	Depth (nm)	Load (μN)	Depth (nm)	Load (μN)	Depth (nm)	Load (μN)	Depth (nm)	Load (μN)	Depth (nm)	Load (μN)	Depth (nm)	Load (μN)	Depth (nm)	Load (μN)	Depth (nm)	Load (μN)	Depth (nm)	Load (μN)	Depth (nm)	Load (μN)
-8.18879	-2.22343	-9.06121	-0.67252	-9.65986	-0.45868	-5.84647	-1.21626	-9.3323	-0.60856	-8.36672	-1.46485	-9.82608	-0.10243	-9.93117	-0.2257	-8.75977	-1.29565	-8.82197	-1.29192	-7.63709	-1.58867	-9.13927	-1.35935
-8.52754	-2.10391	-9.05395	-0.55305	-8.80779	-0.54586	-6.01652	-0.93888	-9.67262	-0.61156	-8.02991	-1.27176	-11.0169	-0.14649	-10.2717	-0.35597	-8.58889	-1.26419	-9.5013	-1.2337	-7.12537	-1.55564	-12.2014	-1.0055
-8.52587	-2.04398	-8.70585	-0.6127	-8.63656	-0.51369	-5.67551	-0.87432	-9.50275	-0.57874	-7.86224	-1.36487	-11.0174	-0.0834	-10.2726	-0.29274	-8.58822	-1.20284	-9.15999	-1.17114	-7.29365	-1.64831	-9.64801	-1.20874
-8.35399	-2.01381	-8.69818	-0.6127	-8.63512	-0.57568	-5.67472	-0.81211	-9.33266	-0.60856	-7.86521	-1.30158	-10.5072	-0.1097	-9.93314	-0.28907	-8.24713	-1.20106	-8.98847	-1.20096	-7.46235	-1.61849	-9.30675	-1.20718
-8.35212	-2.01381	-8.69051	-0.6127	-8.46369	-0.6055	-5.50371	-0.77965	-9.33278	-0.60856	-8.03817	-1.27176	-10.1672	-0.1061	-9.76366	-0.31889	-8.24626	-1.20106	-8.64675	-1.26061	-7.63085	-1.64981	-9.64591	-1.20874
-8.18024	-1.98357	-8.34242	-0.67236	-8.29246	-0.57333	-5.3325	-0.80947	-8.99269	-0.60548	-8.04092	-1.27176	-10.1675	-0.1061	-9.59439	-0.28533	-8.24517	-1.26248	-8.47544	-1.22922	-7.28913	-1.64831	-9.30443	-1.26839
-8.17857	-1.92342	-8.50496	-0.64253	-8.29123	-0.57333	-5.16149	-0.77694	-9.16302	-0.57566	-7.53326	-1.29785	-9.99749	-0.13592	-9.42491	-0.31515	-8.2445	-1.20106	-8.64435	-1.1994	-7.62804	-1.58867	-9.13338	-1.237
-8.00669	-1.89304	-8.32708	-0.67236	-8.46022	-0.54351	-5.16049	-0.77694	-8.82293	-0.57252	-7.70622	-1.26803	-9.82773	-0.10243	-9.59584	-0.28533	-8.07342	-1.23088	-8.47283	-1.22922	-7.45632	-1.61849	-9.30233	-1.26839
-8.00481	-1.89304	-8.3194	-0.67236	-8.28899	-0.51127	-4.98948	-0.74433	-8.82305	-0.57252	-7.53876	-1.29785	-9.65754	-0.19555	-9.42636	-0.31515	-7.73233	-1.22903	-8.64174	-1.1994	-7.45502	-1.55728	-9.13128	-1.237
-7.83294	-1.86258	-8.31194	-0.61252	-8.11756	-0.54109	-4.81848	-0.71166	-8.82318	-0.57252	-7.54152	-1.29785	-9.82821	-0.10243	-9.4273	-0.2517	-8.07187	-1.16938	-8.13001	-1.22759	-7.28331	-1.5871	-8.96002	-1.26682
-7.83106	-1.86258	-8.13405	-0.64234	-7.94612	-0.57091	-4.81747	-0.71166	-8.6533	-0.53948	-7.37427	-1.26423	-9.82844	-0.10243	-9.08761	-0.31133	-7.90078	-1.19921	-8.1287	-1.22759	-7.28159	-1.64831	-8.95896	-1.26682
-7.82939	-1.80222	-8.12638	-0.64234	-7.77468	-0.60073	-4.81646	-0.71166	-8.48321	-0.5693	-7.54724	-1.23442	-9.65847	-0.13225	-9.25854	-0.28152	-7.7297	-1.22903	-8.2974	-1.25905	-6.93987	-1.64674	-8.6177	-1.26519
-7.65752	-1.77162	-7.9487	-0.61225	-7.77346	-0.60073	-4.98588	-0.61927	-8.48333	-0.5693	-7.37978	-1.26423	-9.48871	-0.0987	-9.25949	-0.218	-7.89924	-1.13764	-7.95567	-1.31869	-7.10878	-1.55564	-8.78665	-1.29665
-7.31543	-1.77077	-7.94103	-0.61225	-7.77244	-0.53859	-4.64466	-0.61627	-8.48345	-0.5693	-7.21254	-1.23055	-9.48894	-0.0987	-9.08979	-0.31133	-7.55794	-1.19728	-8.12458	-1.28887	-6.76685	-1.61528	-8.61539	-1.32647
-7.14334	-1.8006	-7.76315	-0.64208	-7.601	-0.56841	-4.47366	-0.58338	-8.31357	-0.53619	-7.21529	-1.23055	-9.31897	-0.12851	-8.75031	-0.30745	-7.55707	-1.19728	-7.95327	-1.25741	-6.93555	-1.58546	-8.44434	-1.29501
-7.31168	-1.77077	-7.75548	-0.64208	-7.59978	-0.56841	-4.47265	-0.58338	-8.14348	-0.56601	-6.87762	-1.29017	-9.14899	-0.15832	-8.92125	-0.27763	-7.38619	-1.16546	-7.78175	-1.28723	-6.76384	-1.61528	-8.44328	-1.29501
-7.13959	-1.8006	-7.40739	-0.70174	-7.59855	-0.56841	-4.30165	-0.55042	-8.1436	-0.56601	-7.05058	-1.26036	-9.31944	-0.12851	-8.92219	-0.21405	-7.3851	-1.2271	-7.61045	-1.2557	-6.59212	-1.6451	-8.44202	-1.35629
-6.96772	-1.76985	-7.74014	-0.64208	-7.42733	-0.53602	-4.30065	-0.55042	-7.97351	-0.59583	-6.71313	-1.25641	-8.97925	-0.18814	-8.75271	-0.24386	-7.38444	-1.16546	-7.77935	-1.22588	-6.42061	-1.61357	-8.44097	-1.35629
-7.13585	-1.8006	-7.56246	-0.61192	-7.25589	-0.56584	-4.47006	-0.45775	-7.97363	-0.59583	-6.71588	-1.25641	-8.97949	-0.18814	-8.41301	-0.30349	-7.04314	-1.22511	-7.60783	-1.2557	-6.24868	-1.70475	-8.26992	-1.32483
-7.13418	-1.74003	-7.38457	-0.64175	-7.08445	-0.59566	-4.29906	-0.42465	-7.97375	-0.59583	-6.71863	-1.25641	-8.97994	-0.1247	-8.41374	-0.30349	-7.04226	-1.22511	-7.60653	-1.2557	-6.5876	-1.6451	-8.26887	-1.32483
-6.79209	-1.73904	-7.3767	-0.70174	-7.25344	-0.56584	-4.12784	-0.45447	-7.80366	-0.62564	-6.55118	-1.28623	-8.98018	-0.1247	-8.41447	-0.30349	-7.04159	-1.1634	-7.43501	-1.28552	-6.24588	-1.64339	-7.92739	-1.38448
-6.96064	-1.6485	-7.36923	-0.64175	-7.082	-0.59566	-3.95684	-0.42129	-7.97421	-0.53283	-6.38394	-1.2524	-8.98041	-0.1247	-8.41541	-0.23983	-6.87051	-1.19322	-7.2635	-1.31535	-6.41458	-1.61357	-7.75634	-1.35295
-6.78876	-1.61754	-7.02114	-0.7014	-7.08077	-0.59566	-3.95605	-0.35822	-7.80433	-0.49958	-6.72711	-1.19277	-8.47002	-0.21414	-8.24593	-0.26965	-6.69942	-1.22304	-7.26219	-1.31535	-6.07286	-1.61179	-8.0955	-1.35466
-6.61667	-1.64736	-7.01347	-0.7014	-6.90955	-0.5632	-3.78483	-0.38804	-7.63403	-0.59247	-6.38944	-1.2524	-8.64046	-0.18433	-8.07644	-0.29946	-6.69854	-1.22304	-7.09089	-1.28374	-5.73072	-1.73286	-7.92424	-1.38448
-6.44459	-1.67719	-7.006	-0.64134	-6.73811	-0.59302	-3.95425	-0.29509	-7.46415	-0.55922	-6.39241	-1.18868	-8.64091	-0.12081	-8.07717	-0.29946	-6.86809	-1.13143	-7.08937	-1.34517	-5.89942	-1.70304	-7.58297	-1.38277
-6.44292	-1.61633	-6.99812	-0.7014	-6.73689	-0.59302	-3.78303	-0.32491	-7.46427	-0.55922	-6.05474	-1.24831	-8.30073	-0.18044	-7.90769	-0.32927	-6.527	-1.12922	-7.08828	-1.28374	-5.89792	-1.70304	-7.58192	-1.38277
-6.44126	-1.5554	-6.82024	-0.73123	-6.73566	-0.59302	-3.61225	-0.22824	-7.2944	-0.52589	-5.88728	-1.27812	-8.30096	-0.18044	-7.90841	-0.32927	-6.3557	-1.2209	-7.08697	-1.28374	-5.72641	-1.67143	-7.41045	-1.47395
-6.09876	-1.67598	-6.64257	-0.701	-6.56443	-0.56049	-3.61124	-0.22824	-7.29452	-0.52589	-6.23046	-1.21849	-8.64162	-0.12081	-7.90914	-0.32927	-6.52504	-1.19108	-6.74545	-1.28189	-5.89511	-1.64161	-7.74982	-1.4143
-6.09688	-1.67598	-6.8051	-0.67117	-6.56321	-0.56049	-3.44024	-0.1947	-7.12443	-0.55571	-5.893	-1.21433	-8.13144	-0.14667	-7.91008	-0.26554	-6.18395	-1.18886	-6.91436	-1.25207	-5.8936	-1.64161	-7.57877	-1.38277
-6.09542	-1.55405	-6.62743	-0.64087	-6.39177	-0.59031	-3.26924	-0.1611	-6.95434	-0.58552	-6.06597	-1.18452	-8.30189	-0.11686	-7.57039	-0.32517	-6.35328	-1.15904	-6.74284	-1.28189	-5.55167	-1.70125	-7.23729	-1.44242
-6.09334	-1.61505	-6.78996	-0.61104	-6.39054	-0.59031	-3.26823	-0.1611	-6.95446	-0.58552	-5.7283	-1.24414	-7.79171	-0.14264	-7.74133	-0.29536	-6.18241	-1.12694	-6.57132	-1.31171	-5.38016	-1.66958	-7.06582	-1.53359
-5.58104	-1.64352	-6.27166	-0.70052	-6.38932	-0.59031	-3.43765	-0.06779	-6.95458	-0.58552	-5.73105	-1.24414	-7.79173	-0.2063	-7.40163	-0.35499	-6.18153	-1.12694	-6.40002	-1.27997	-5.20845	-1.6994	-6.89477	-1.50206
-5.74938	-1.6137	-6.26399	-0.70052	-6.21809	-0.55771	-3.26687	0.02959	-6.78449	-0.61534	-5.73402	-1.18028	-7.96239	-0.11283	-7.23215	-0.3848	-5.84044	-1.12458	-6.39871	-1.27997	-5.20694	-1.6994	-7.23414	-1.44242
-5.7473	-1.6747	-6.08611	-0.73035	-6.04666	-0.58752	-3.09565	-0.000222	-6.95482	-0.58552	-5.56678	-1.14617	-7.7922	-0.2063	-7.4033	-0.29119	-5.83957	-1.12458	-6.56762	-1.25015	-5.20543	-1.6994	-6.89267	-1.50206
-5.74564	-1.6137	-6.07844	-0.73035	-5.87522	-0.61734	-3.09508	0.12726	-6.61473	-0.58195	-5.39932	-1.17598	-7.79265	-0.14264	-7.23382	-0.321	-5.83869	-1.12458	-6.05568	-1.33961	-5.20392	-1.6994	-7.23204	-1.44242
-5.57355	-1.64352	-6.07076	-0.73035	-5.87399	-0.61734	-2.92386	0.09745	-6.61485	-0.58195	-5.40207	-1.17598	-7.62289	-0.10873	-7.23455	-0.321	-5.83781	-1.12458	-6.22459	-1.30979	-5.03242	-1.66765	-6.72056	-1.47046
-5.57189	-1.58245	-6.0633	-0.67014	-5.87298	-0.55485	-2.92307	0.16129	-6.61498	-0.58195	-5.0644	-1.2356	-7.4527	-0.20227	-7.06506	-0.35081	-5.83715	-1.06251	-6.05328	-1.27797	-4.86049	-1.75904	-6.7193	-1.53188
-5.57022	-1.52131	-6.22604	-0.58004	-5.70154	-0.58467	-2.58164	0.10167	-6.27489	-0.5783	-4.89695	-1.26542	-7.62337	-0.10873	-6.89558	-0.38063	-5.49606	-1.06001	-6.22219	-1.24815	-4.85919	-1.69747	-6.54804	-1.5617
-5.22792	-1.58096	-5.70753	-0.7298	-5.87053	-0.55485	-2.75128	0.25939	-6.27501	-0.5783	-5.24012	-1.20579	-7.11319	-0.13437	-6.89652	-0.31675	-5.49497	-1.12215	-6.05067	-1.27797	-5.02789	-1.66765	-6.37678	-1.59153
-5.22626	-1.51975	-5.69986	-0.7298	-5.52888	-0.61449	-2.75027	0.25939	-6.27513	-0.5783	-5.07288	-1.1716	-7.45363	-0.13854	-6.89725	-0.31675	-5.32431	-1.02762	-5.87936	-1.24608	-4.68596	-1.72729	-6.37573	-1.59153
-5.22418	-1.58096	-5.6924	-0.66952	-5.52765	-0.61449	-2.40928	0.32796	-6.27525	-0.5783	-5.07563	-1.1716	-7.11366	-0.13437	-6.89798	-0.31675	-5.32343	-1.02762	-5.70785	-1.2759	-4.68445	-1.72729	-6.7151	-1.53188
-5.0523	-1.54957	-5.68473	-0.66952	-5.35622	-0.64431	-2.40828	0.32796	-6.10516	-0.60811	-4.73818	-1.16715	-7.28389	-0.16836	-6.72849	-0.34657	-5.49276	-0.9978	-5.36612	-1.33554	-4.68316	-1.66565	-6.20362	-1.55992
-4.88022	-1.57939	-5.50705	-0.639	-5.18499	-0.61156	-2.23728	0.36235	-5.93529	-0.57457	-5.08135	-1.10753	-6.94392	-0.16418	-6.55901	-0.37638	-5.15147	-1.05744	-5.53503	-1.30572	-4.51165	-1.63375	-6.20236	-1.62135
-4.87835	-1.57939	-5.32917	-0.66883	-5.35398	-0.58174	-2.23649	0.42662	-5.93541	-0.57457	-4.57369	-1.13282	-6.77395	-0.194	-6.21953	-0.37206	-5.49122	-0.93552	-5.70414	-1.21412	-4.33993	-1.66358	-6.20152	-1.55992
-4.70626	-1.60921	-5.32129	-0.72918	-5.35275	-0.58174	-2.23548	0.42662	-6.10595	-0.48133	-4.57645	-1.13282	-6.94439	-0.16418	-6.56068	-0.31243	-4.97993	-0.96262	-5.36242	-1.27376	-4.50863	-1.63375	-6.37068	-1.5301
-4.7046	-1.54793	-5.14361	-0.69866	-5.01131	-0.57874	-2.0647	0.52558	-5.59544	-0.57078	-4.57942	-1.0686	-6.77442	-0.194	-6.39142	-0.27823	-5.31947	-0.90299	-5.36111	-1.27376	-4.16692	-1.63161	-5.85899	-1.61957
-4.70272	-1.54793	-5.13594	-0.69866	-4.83967	-0.67119	-2.23391	0.55539	-5.42535	-0.60059	-4.58217	-1.0686	-6.60444	-0.22381	-6.22172	-0.37206	-4.9786	-0.8377	-5.18959	-1.30358	-3.99499	-1.72322	-6.02815	-1.58974
-4.70106	-1.48657	-5.12827	-0.69866	-4.83865	-0.60856	-2.06313	0.65462	-5.59547	-0.6342	-4.41493	-1.03412	-6.60468	-0.22381	-6.22244	-0.37206	-4.6373	-0.89734	-5.18829	-1.30358	-3.99348	-1.72322	-5.85689	-1.61957
-4.35876	-1.54622	-4.95039	-0.72848	-4.83721	-0.67119	-1.89191	0.62481	-5.42559	-0.60059	-4.41768	-1.03412	-6.43492	-0.18975	-6.05318	-0.33786	-4.63642	-0.89734	-5.18719	-1.24173	-3.99197	-1.72322	-5.68584	-1.58789
-4.5271	-1.5164	-5.11313	-0.63824	-4.8362	-0.60856	-1.72113	0.72434	-5.59592	-0.57078	-4.25022	-1.06393	-6.43516	-0.18975	-6.0539	-0.33786	-4.63555	-0.89734	-4.84526	-1.36322	-3.65004	-1.78286	-5.68458	-1.64939
-4.18501	-1.51461	-4.93525	-0.66806	-4.66476	-0.63837	-1.72035	0.78911	-5.42605	-0.53709	-4.08298	-1.02938	-6.43539	-0.18975	-6.05463	-0.33786	-4.46467	-0.86459	-4.84416	-1.30137	-3.98896	-1.72322	-5.51352	-1.61771
-4.35335	-1.48479	-4.75737	-0.69789	-4.49354	-0.60548	-1.54913	0.7593	-5.42617	-0.53709	-4.08574	-1.02938	-6.26563	-0.15562	-5.88537	-0.30358	-4.29359	-0.89441	-4.84286	-1.30137	-3.64724	-1.72107	-5.68268	-1.58789
-4.18148	-1.45311	-4.57969	-0.66722	-4.49231	-0.60548	-1.54835	0.82415	-5.25608	-0.56691	-4.08871	-0.96495	-6.09544	-0.24938	-5.71588	-0.33339	-4.46313	-0.80195	-4.84155	-1.30137	-3.81594	-1.69125	-5.171	-1.67735
-4.00939	-1.48294	-4.57202	-0.66722	-4.6613	-0.57566	-1.54756	0.88906	-5.08599	-0.59672	-3.92125	-0.99476	-6.09568	-0.24938	-5.5464	-0.36321	-4.46225	-0.80195	-4.67004	-1.33119	-3.47422	-1.68903	-5.34016	-1.64753
-4.00752	-1.48294	-4.39414	-0.69705	-4.31986	-0.57252	-1.54677	0.95405	-4.74569	-0.65635	-3.75379	-1.02457	-6.09613	-0.18543	-5.71734	-0.33339	-4.29138	-0.76906	-4.66894	-1.26926	-3.47271	-1.68903	-5.16869	-1.73886
-4.00586	-1.42137	-4.38647	-0.69705	-4.31864	-0.57252	-1.37578	0.9893	-4.91624	-0.56297	-3.75676	-0.96007	-5.92615	-0.21525	-5.37764	-0.39302	-4.12051	-0.7361	-4.327	-1.39083	-3.64142	-1.65921	-5.16784	-1.67735
-3.83398	-1.38955	-4.37879	-0.69705	-4.14741	-0.53948	-1.20478	1.02462	-4.74615	-0.59278	-3.58931	-0.98988	-5.58619	-0.21086	-5.37859	-0.32886	-4.11984	-0.67324	-4.66633	-1.26926	-3.2997	-1.65693	-4.99679	-1.64561
-3.66169	-1.48101	-4.20091	-0.72688	-4.14619	-0.53948	-1.204	1.08982	-4.74627	-0.59278	-3.59206	-0.98988	-5.75642	-0.24506	-5.37931	-0.32886	-3.94876	-0.70306	-4.49502	-1.23708	-3.29819	-1.65693	-4.99574	-1.64561
-3.83023	-1.38955	-4.36366	-0.63649	-4.14496	-0.53948	-1.033	1.12528	-4.74639	-0.59278	-3.42482	-0.95512	-5.75665	-0.24506	-5.20983	-0.35867	-3.94809	-0.64014	-4.49372	-1.23708	-3.46689	-1.6271	-4.82406	-1.7985
-3.65836	-1.35765	-4.5264	-0.54603	-3.97352	-0.5693	-1.03222	1.19063	-4.74651	-0.59278	-3.42757	-0.95512	-5.5869	-0.21086	-5.21056	-0.35867	-3.94722	-0.64014	-4.1522	-1.23466	-3.29539	-1.59492	-4.65301	-1.76682
-3.48628	-1.38748	-4.00831	-0.5748	-3.97251	-0.50638	-1.03121	1.19063	-4.57663	-0.55896	-3.43054	-0.89047	-5.58713	-0.21086	-5.04107	-0.38848	-3.94656	-0.57714	-4.15069	-1.29672	-3.12388	-1.56267	-4.65196	-1.76682
-3.3144	-1.35551	-4.00063	-0.5748	-3.63086	-0.56601	-0.86044	1.29172	-4.23633	-0.61858	-3.43352	-0.82575	-5.41716	-0.24067	-5.0418	-0.38848	-3.77547	-0.60696	-3.97917	-1.32654	-2.95216	-1.59249	-4.65069	-1.82832
-3.48274	-1.32569	-3.82275	-0.60463	-3.62964	-0.56601	-1.02987	1.38708	-4.40666	-0.58877	-3.26606	-0.85556	-5.24718	-0.27048	-5.04275	-0.32425	-3.43438	-0.60352	-3.97808	-1.26448	-2.78044	-1.62231	-4.65006	-1.70525
-3.31087	-1.29366	-3.81508	-0.60463	-3.62841	-0.56601	-0.51845	1.36329	-4.40678	-0.58877	-3.09882	-0.82059	-5.41763	-0.24067	-4.87326	-0.35406	-3.77414	-0.48075	-3.97698	-1.20233	-2.60873	-1.65213	-4.4788	-1.73507
-3.13878	-1.32348	-3.6372	-0.63445	-3.6274	-0.50302	-0.68788	1.45879	-4.23691	-0.55487	-3.10157	-0.82059	-5.07744	-0.30029	-4.70378	-0.38387	-3.26264	-0.5702	-3.80547	-1.23215	-2.77764	-1.56017	-4.47754	-1.79664
-3.13691	-1.32348	-3.62953	-0.63445	-3.45596	-0.53283	-0.34668	1.46495	-4.06682	-0.58469	-3.10454	-0.75573	-5.0779	-0.23621	-4.5343	-0.41369	-3.6024	-0.44736	-3.80416	-1.23215	-2.43571	-1.61981	-4.4767	-1.73507
-3.13524	-1.26155	-3.79227	-0.54385	-3.45495	-0.46977	-0.34589	1.53079	-3.89695	-0.55072	-2.93731	-0.7206	-5.07813	-0.23621	-4.70523	-0.38387	-3.43152	-0.4139	-3.63286	-1.19976	-2.4342	-1.61981	-4.30543	-1.76489
-2.96316	-1.29137	-3.44418	-0.6035	-3.28351	-0.49958	-0.34489	1.53079	-3.72664	-0.64431	-2.76985	-0.75041	-4.56795	-0.26148	-4.36554	-0.4435	-3.26044	-0.44371	-3.63155	-1.19976	-2.4327	-1.61981	-4.13417	-1.79471
-2.9615	-1.22937	-3.60692	-0.51283	-3.28229	-0.49958	-0.00391	1.60308	-3.89719	-0.55072	-2.94303	-0.6556	-4.73818	-0.29583	-4.19606	-0.47331	-3.25977	-0.38036	-3.46004	-1.22958	-2.60161	-1.52777	-4.13333	-1.73307
-2.95984	-1.1673	-3.25883	-0.57248	-3.11107	-0.46626	-0.17311	1.63289	-3.89731	-0.55072	-2.7758	-0.62034	-4.90863	-0.26602	-4.36721	-0.37919	-3.25911	-0.31694	-3.45873	-1.22958	-2.42989	-1.55759	-4.13207	-1.79471
-2.78775	-1.19712	-3.42158	-0.48174	-3.10984	-0.46626	-0.00212	1.66914	-3.89743	-0.55072	-2.60856	-0.585	-4.73887	-0.23167	-4.19773	-0.409	-3.08824	-0.28326	-3.28743	-1.19711	-2.25839	-1.52512	-4.13144	-1.67136
-2.61588	-1.1648	-3.2437	-0.51156	-2.93862	-0.43287	-0.17155	1.76507	-3.55735	-0.54649	-2.44132	-0.54959	-4.5689	-0.26148	-4.36867	-0.37919	-3.08758	-0.2197	-3.45633	-1.1673	-2.25709	-1.46277	-3.96017	-1.70118
-2.61422	-1.10259	-2.89581	-0.51022	-3.10782	-0.33977	-0.000781	1.86773	-3.55747	-0.54649	-2.27386	-0.5794	-4.56913	-0.26148	-4.1994	-0.34463	-2.91671	-0.18587	-3.11482	-1.16458	-2.08558	-1.43016	-3.61891	-1.69903
-2.61234	-1.10259	-3.05814	-0.54139	-2.93638	-0.36959	--	--	-3.55759	-0.54649	-2.44705	-0.4843	-4.39938	-0.22706	-3.85971	-0.40425	-2.91605	-0.12217	-3.28393	-1.07234	-2.25429	-1.40034	-3.61765	-1.76082
-2.44047	-1.07013	-2.71026	-0.54005	-2.76516	-0.33605	0	1.93407	-3.38771	-0.51238	-2.27959	-0.51411	-4.39961	-0.22706	-3.69022	-0.43406	-2.7454	-0.02435	-3.11242	-1.10215	-2.08278	-1.36765	-3.44639	-1.79064
-2.43881	-1.00777	-2.8728	-0.51022	-2.59372	-0.36587	-0.33874	1.79487	-3.38783	-0.51238	-2.28257	-0.44875	-4.39985	-0.22706	-3.86116	-0.40425	-2.57431	-0.05417	-3.11132	-1.03966	-1.91128	-1.3349	-3.78597	-1.66921
-2.60715	-0.97795	-2.69512	-0.47898	-2.59271	-0.30245	0.00246	1.80146	-3.21796	-0.47819	-2.28554	-0.38333	-4.22987	-0.25688	-4.0321	-0.37444	-2.57365	0.00975	-2.94002	-1.0069	-1.90998	-1.27226	-3.6147	-1.69903
-2.26506	-0.97516	-2.85766	-0.44916	-2.42127	-0.33226	0.34299	2.00736	-3.2183	-0.41412	-2.11831	-0.34763	-4.0599	-0.28669	-3.52241	-0.39943	-2.57299	0.07375	-2.93893	-0.94427	-1.90869	-1.20955	-3.44365	-1.667
-2.09319	-0.94249	-2.67999	-0.41785	-2.42005	-0.33226	0.68146	2.81849	-3.04821	-0.44393	-2.12128	-0.28206	-3.88992	-0.3165	-3.52314	-0.39943	-2.40212	0.108	-2.76741	-0.97408	-1.73718	-1.17658	-3.4426	-1.667
-2.26174	-0.8501	-2.5021	-0.44768	-2.41904	-0.26877	1.36007	3.65047	-2.87812	-0.47375	-1.95405	-0.24622	-3.71995	-0.34631	-3.35366	-0.42924	-2.40146	0.17213	-2.5959	-1.0039	-1.73567	-1.17658	-3.27155	-1.63489
-2.09009	-0.75457	-2.49464	-0.38647	-2.41781	-0.26877	2.03864	4.49641	-2.87824	-0.47375	-1.78681	-0.21031	-4.06082	-0.22238	-3.6948	-0.36962	-2.40081	0.23634	-2.59481	-0.94119	-1.56417	-1.14354	-3.27029	-1.69682
-1.918	-0.78439	-2.31697	-0.35502	-2.24659	-0.23502	2.71716	5.35631	-2.87858	-0.40961	-1.96	-0.11472	-3.72064	-0.28201	-3.52554	-0.33491	-2.22994	0.2708	-2.4235	-0.90822	-1.56288	-1.08061	-3.26945	-1.63489
-2.08655	-0.69179	-2.3093	-0.35502	-2.24536	-0.23502	3.39587	6.15878	-2.8787	-0.40961	-1.96297	-0.04886	-3.89108	-0.2522	-2.84542	-0.45415	-2.2295	0.39957	-2.4222	-0.90822	-1.39137	-1.04743	-2.92819	-1.63253
-1.9149	-0.59583	-2.47204	-0.26386	-2.07414	-0.20119	3.90433	7.00308	-2.87904	-0.3454	-1.45532	-0.07235	-3.55112	-0.24744	-3.18657	-0.39453	-2.05863	0.43425	-2.42089	-0.90822	-1.39008	-0.98436	-3.09734	-1.60271
-2.08345	-0.50302	-2.29416	-0.29368	-2.07313	-0.13749	4.41276	7.85941	-2.53896	-0.34074	-1.4583	-0.00635	-3.38114	-0.27725	-3.18752	-0.32994	-2.22818	0.52862	-2.24959	-0.87519	-1.38879	-0.92122	-2.75608	-1.60027
-1.74137	-0.49958	-2.11649	-0.26208	-1.90191	-0.10352	4.92139	8.65368	-2.53908	-0.34074	-1.46127	0.05972	-3.38116	-0.34163	-3.01803	-0.35975	-1.88711	0.53363	-2.41871	-0.78245	-1.38749	-0.85801	-2.75503	-1.60027
-1.73971	-0.43645	-2.10903	-0.2006	-1.90069	-0.10352	5.25978	9.48798	-2.5392	-0.34074	-1.46425	0.12586	-3.38162	-0.27725	-3.18897	-0.32994	-1.71646	0.6333	-2.24741	-0.74927	-1.21621	-0.76118	-2.58398	-1.56795
-1.56784	-0.40305	-1.93135	-0.16886	-1.89968	-0.03967	5.76834	10.3028	-2.53953	-0.27638	-1.29702	0.16227	-3.55206	-0.24744	-2.67907	-0.41937	-1.88579	0.66311	-2.07611	-0.71601	-1.21491	-0.69776	-2.58293	-1.56795
-1.5664	-0.27642	-1.92389	-0.10723	-1.72824	-0.06948	6.10666	11.1576	-2.36966	-0.24177	-1.29977	0.16227	-3.04167	-0.33688	-2.85023	-0.3249	-1.54493	0.73325	-2.07502	-0.65288	-1.21384	-0.57069	-2.75209	-1.53813
-1.56474	-0.213	-2.08643	-0.07741	-1.55724	0.02862	6.61542	11.9154	-2.37	-0.17727	-1.13276	0.26511	-3.0419	-0.33688	-2.85095	-0.3249	-1.71427	0.76306	-2.07371	-0.65288	-1.21255	-0.50706	-2.58104	-1.50574
-1.39308	-0.11576	-1.73855	-0.07535	-1.72644	0.12249	6.9534	12.8682	-2.02992	-0.17232	-1.13574	0.33153	-2.87193	-0.36669	-2.85168	-0.3249	-1.37341	0.83349	-1.90241	-0.61948	-1.04126	-0.40938	-2.5802	-1.44345
-1.39143	-0.05212	-1.56088	-0.0434	-1.72543	0.18663	7.4621	13.6448	-2.03004	-0.17232	-1.13872	0.39803	-2.87216	-0.36669	-2.17156	-0.44414	-1.37276	0.89862	-1.73111	-0.58602	-1.03997	-0.34553	-2.23872	-1.50309
-1.21956	-0.01823	-1.72362	0.04827	-1.55421	0.22102	7.97049	14.5101	-2.20059	-0.07788	-1.14193	0.53124	-2.70241	-0.33205	-2.3425	-0.41433	-1.20167	0.86882	-1.73002	-0.52267	-1.0389	-0.21761	-2.40809	-1.41091
-1.21812	0.10939	-1.54595	0.08036	-1.5532	0.2853	8.30864	15.4153	-2.03072	-0.04297	-1.1449	0.59795	-3.04306	-0.27243	-2.34323	-0.41433	-1.20102	0.93402	-1.72893	-0.45924	-0.8674	-0.18335	-2.40726	-1.34849
-1.38668	0.20313	-1.53849	0.14235	-1.38177	0.25549	8.6473	16.1675	-1.86085	-0.008	-0.9779	0.70178	-2.70288	-0.33205	-2.51417	-0.38452	-1.03015	0.96948	-1.55784	-0.362	-0.86633	-0.05501	-2.23621	-1.3158
-1.04482	0.27155	-1.36082	0.17458	-1.21077	0.35444	9.15588	16.9795	-2.0314	0.08666	-0.98088	0.76871	-2.70333	-0.26753	-2.34468	-0.41433	-1.19971	1.06464	-1.38633	-0.39181	-0.69505	0.04381	-2.23537	-1.25324
-1.04338	0.39989	-1.35336	0.23671	-1.20976	0.41894	9.49449	17.7467	-1.69133	0.09196	-0.81365	0.8059	-2.53336	-0.29734	-1.835	-0.43902	-1.02906	1.16573	-1.38524	-0.32817	-0.69398	0.17272	-2.23453	-1.19059
-0.87151	0.43435	-1.17569	0.26909	-1.03855	0.45369	10.0027	18.659	-1.86188	0.18677	-0.64665	0.91031	-2.19339	-0.29237	-2.00616	-0.34441	-1.19862	1.2611	-1.38415	-0.26447	-0.69291	0.30192	-2.2339	-1.0651
-0.87008	0.56312	-1.16823	0.33136	-1.20797	0.61283	10.5112	19.4968	-1.69201	0.22202	-0.47942	0.94772	-2.36362	-0.32715	-2.00688	-0.34441	-0.85755	1.26711	-1.38306	-0.20069	-0.69162	0.36662	-2.06285	-1.03206
-0.69843	0.66236	-0.99056	0.36389	-1.03653	0.58302	10.8498	20.2875	-1.52214	0.25735	-0.48263	1.08235	-2.36386	-0.32715	-2.17782	-0.3146	-0.85712	1.39858	-1.38197	-0.13684	-0.52056	0.53136	-2.06202	-0.96913
-0.86699	0.7568	-0.9831	0.4263	-0.86532	0.61799	11.188	21.1715	-1.35205	0.22755	-0.48561	1.14978	-2.1941	-0.29237	-2.00856	-0.27953	-0.68625	1.43462	-1.21089	-0.03873	-0.5195	0.66141	-1.89097	-0.93595
-0.69535	0.85646	-0.97564	0.48878	-0.6941	0.65303	11.6967	21.9475	-1.52282	0.38784	-0.48882	1.28483	-2.02413	-0.32218	-1.66886	-0.33915	-0.51539	1.47073	-1.0396	-0.00448	-0.34822	0.76194	-1.72014	-0.83956
-0.52348	0.8915	-1.13839	0.58116	-0.86352	0.81274	12.205	22.8182	-1.18275	0.39358	-0.32159	1.32267	-2.19457	-0.29237	-1.67003	-0.20918	-0.68495	1.56652	-1.03851	0.05965	-0.51759	0.98778	-1.54909	-0.80617
-0.52205	1.0214	-0.96094	0.67666	-0.86252	0.8778	12.3733	23.6686	-1.52351	0.51861	-0.32481	1.45816	-2.19503	-0.22771	-1.67076	-0.20918	-0.51409	1.60277	-1.03742	0.12386	-0.17589	0.99365	-1.54825	-0.74289
-0.52084	1.21679	-0.95348	0.73943	-0.69153	0.97833	12.7117	24.4964	-1.35364	0.5543	-0.32802	1.59393	-1.85484	-0.28733	-1.8417	-0.17937	-0.34322	1.63909	-1.03677	0.3169	-0.00462	1.09504	-1.54742	-0.67953
-0.34898	1.25225	-0.77602	0.83536	-0.52031	1.01379	13.3905	25.2719	-1.184	0.65569	-0.16079	1.63213	-1.8553	-0.2226	-1.502	-0.23899	-0.17236	1.67549	-1.03569	0.38139	-0.17377	1.25632	-1.37637	-0.64592
-0.34755	1.38301	-0.76857	0.89834	-0.51931	1.07914	13.8991	26.0843	-1.18412	0.65569	-0.16401	1.76832	-1.85553	-0.2226	-1.16253	-0.23352	-0.34215	1.8379	-0.86461	0.48078	-0.17293	1.45406	-1.54574	-0.55261
-0.34612	1.51405	-0.76133	1.02452	-0.34831	1.18023	14.4073	26.995	-1.18469	0.78718	0.00322	1.80673	-1.68578	-0.1876	-1.33369	-0.13855	-0.34149	1.90431	-0.69331	0.51567	-0.00166	1.55644	-1.3747	-0.51886
-0.3447	1.64537	-0.58366	1.0579	-0.34731	1.24579	14.7456	27.852	-1.01504	0.88914	--	--	-1.34559	-0.24722	-1.1642	-0.16835	-0.00065	1.97775	-0.69245	0.64529	-0.17104	1.78505	-1.37408	-0.39152
-0.34327	1.77698	-0.40621	1.15469	-0.1761	1.28161	15.2544	28.5938	-0.67497	0.89552	0	1.94336	-1.51604	-0.21741	-0.99494	-0.13293	--	--	-0.69136	0.71021	--	--	-1.37346	-0.26388
-0.17186	1.94512	-0.56896	1.24791	-0.1751	1.34731	15.5927	29.4643	-0.84552	0.99139	0.16746	1.91356	-1.34607	-0.24722	-1.16588	-0.10312	0	2.04437	-0.35008	0.78064	0	1.9547	-1.20242	-0.22978
--	--	-0.39151	1.34512	-0.17432	1.47893	16.1011	30.3123	-0.84587	1.05752	0.16424	2.05047	-1.51651	-0.21741	-1.33704	-0.00801	0.000423	2.17784	-0.51943	0.94078	0.17149	1.99152	-1.03159	-0.13153
0	1.98144	-0.21406	1.44263	-0.17354	1.61083	16.4393	31.1972	-0.676	1.09392	0.16126	2.11903	-1.34676	-0.18235	-1.33799	0.05737	0.0013	2.17784	-0.51857	1.0714	0.00256	2.08802	-1.20097	-0.03758
0.34229	1.92183	-0.37682	1.5362	-0.00233	1.64708	16.7779	31.9936	-0.50636	1.19674	0.32613	2.84811	-1.17678	-0.21216	-0.99852	0.0632	0.17216	2.21487	-0.34727	1.10701	0.17405	2.12499	-1.03014	0.06109
0.00352	2.04763	-0.19937	1.63413	-0.00178	1.84567	17.4564	32.8327	-0.67692	1.29296	0.4905	3.72626	-1.17724	-0.14721	-0.99947	0.12872	0.34073	2.92499	-0.51662	1.26786	0.34326	2.83433	-1.02953	0.18986
-0.16527	2.21004	-0.19213	1.76215	-0.000775	1.91201	17.9651	33.6117	-0.50728	1.39621	0.9955	4.48568	-1.17748	-0.14721	-1.00064	0.25997	1.01897	3.82866	-0.17534	1.33957	0.51197	3.68915	-0.85871	0.2891
0.1743	2.95203	-0.01469	1.86065	--	--	18.4735	34.494	-0.50763	1.46284	1.16003	5.31491	-1.17793	-0.08219	-1.00159	0.3257	1.69763	4.60892	-0.17449	1.47119	1.02106	4.49641	-0.85809	0.41844
0.68382	3.74259	-0.00723	1.92491	0	2.04491	18.8119	35.3149	-0.33799	1.56652	1.49475	6.12461	-1.00818	-0.04691	-0.83233	0.3617	2.20604	5.431	-0.00342	1.57328	0.67929	5.39431	-0.68727	0.51825
0.85287	4.60477	--	--	-0.16831	1.87548	19.1503	36.1415	-0.33857	1.70028	1.65922	6.97433	-1.00841	-0.04691	-0.83351	0.49352	2.5442	6.2949	-0.17277	1.73526	1.01834	6.1833	-0.68666	0.64816
1.19233	5.37921	0	2.05365	0.17311	1.88221	19.8288	37.0141	-0.33914	1.83432	1.82365	7.8343	-0.83866	-0.01155	-0.49404	0.49992	3.22274	7.11127	-0.00171	1.83793	1.18714	7.01232	-0.68605	0.77835
1.36154	6.19368	0.5183	1.96422	0.34342	2.18518	19.8271	37.8122	-0.16928	1.87165	2.15826	8.67474	-0.83912	0.05368	-0.6652	0.59581	3.56081	7.99924	0.16936	1.94087	1.3559	7.85157	-0.51501	0.81374
1.53047	7.09007	0.01512	2.11812	0.51189	3.02889	20.5055	38.6976	0.000349	1.97633	2.32262	9.5552	-0.66937	0.08917	-0.66638	0.7282	4.23952	8.76545	--	--	1.52463	8.70107	-0.51441	0.94436
1.86958	7.96869	0.02258	2.18267	0.85076	3.78629	21.0141	39.5184	--	--	2.48721	10.3688	-0.84003	0.18436	-0.66755	0.86088	4.74773	9.64679	0	2.10371	1.69358	9.4863	-0.5138	1.07526
2.3791	8.75606	0.19758	2.99842	1.18935	4.62334	21.1822	40.4042	0	2.04367	2.65177	11.191	-1.0107	0.27961	-0.32809	0.86771	5.25615	10.4642	0.34195	1.97755	1.86224	10.3554	-0.51319	1.20645
2.71838	9.58344	0.54276	3.79638	1.52791	5.47241	21.691	41.1339	0.51051	1.95427	2.98651	11.9921	-0.67096	0.3511	-0.32904	0.93423	5.42438	11.2745	0.17305	2.00736	2.03112	11.1586	-0.51281	1.40376
3.22783	10.3913	0.8879	4.60637	1.86643	6.33351	22.0293	42.001	-0.000241	2.04367	3.32123	12.8018	-0.50144	0.45269	-0.16001	1.03767	5.93274	12.1115	0.34411	2.11073	2.19972	12.0474	-0.34222	1.57191
3.22688	11.2227	1.06278	5.45817	2.20515	7.13446	22.3679	42.77	-0.00082	2.17857	3.14528	13.7093	-0.67211	0.54829	-0.16096	1.1044	6.44107	12.9588	0.51266	2.95352	2.36854	12.8686	-0.34162	1.70423
3.56606	12.08	1.40783	6.2922	2.54359	8.01869	22.8763	43.6184	0.33671	2.93435	3.65014	14.5065	-0.67256	0.61417	-0.16214	1.23807	6.94935	13.8163	1.02159	3.74874	2.3674	13.6497	-0.17081	1.80704
4.07541	12.9178	1.41243	7.19782	2.88249	8.76711	23.0444	44.5318	0.84394	3.80918	3.98477	15.3421	-0.50304	0.71632	-0.16333	1.37202	7.45761	14.6841	1.19006	4.61557	2.53616	14.4873	--	--
4.41479	13.7171	1.75788	7.91393	3.22111	9.59881	23.5528	45.3918	1.18116	4.65742	3.97923	16.1632	-0.50372	0.84857	0.0057	1.47646	7.9661	15.4812	1.69914	5.36452	2.87511	15.3039	0	1.91013
4.58392	14.5547	1.7624	8.84173	3.55969	10.4408	24.0615	46.1512	1.68878	5.41673	4.31379	17.0152	-0.33398	0.88499	0.00452	1.61099	8.30463	16.2349	1.86753	6.25447	2.87361	16.1885	0.3417	1.78404
4.75303	15.4009	2.10754	9.64926	3.89824	11.293	24.2298	46.9743	1.8557	6.31789	4.3082	17.8512	-0.33466	1.01766	0.17377	1.64856	8.81279	17.1309	2.3763	7.09689	3.04229	17.0519	0.17209	1.94688
5.26252	16.1963	2.28244	10.4968	4.06654	12.1852	24.5683	47.7724	2.36326	7.09856	4.643	18.6349	-0.16514	1.12081	0.17258	1.78351	9.15099	17.9835	2.71531	7.83513	3.38144	17.8119	0.17269	2.0802
5.6015	17.1117	2.62752	11.3248	4.57549	12.95	24.9065	48.6832	2.87052	7.9633	4.97749	19.5112	-0.1656	1.1874	0.00119	1.94854	9.82957	18.7854	2.71338	8.78907	3.37985	18.7216	0.171	2.8861
5.77052	17.9846	2.8026	12.1177	4.91394	13.8322	25.0748	49.5206	3.03758	8.82487	5.14203	20.3396	-0.16652	1.38758	--	--	10.3376	19.7105	3.22254	9.51634	3.71894	19.4965	0.67967	3.68131
6.2802	18.7234	2.97766	12.9191	5.42283	14.615	25.5834	50.3034	3.37482	9.66693	5.30654	21.1751	-0.16721	1.52139	0	2.08406	10.6763	20.4184	3.56094	10.4329	3.71759	20.338	0.84789	4.54814
6.61937	19.583	3.15242	13.8059	5.76121	15.5168	25.9219	51.1204	3.71228	10.4428	5.64124	21.988	0.00231	1.62568	0.33992	1.95667	11.1846	21.2751	3.89983	11.2088	3.88642	21.1569	1.0163	5.35667
6.9588	20.3665	3.32742	14.6253	6.44025	16.288	26.2599	52.0523	4.04945	11.3046	5.6355	22.8675	-0.16882	1.85716	0.3392	1.95667	11.523	22.0829	4.23842	12.0703	4.05494	22.0689	1.52485	6.18705
7.128	21.1869	3.67233	15.502	7.11926	17.0678	26.4281	52.9085	4.21664	12.1282	5.79995	23.7243	0.000695	1.96216	0.33801	2.09233	11.861	22.9857	4.40704	12.8939	4.39422	22.7864	1.52298	7.0467
7.63729	22.041	3.67732	16.29	7.62775	17.9689	26.7665	53.7397	4.554	12.9308	5.96436	24.5883	0	2.09725	0.5047	2.88249	12.5397	23.7492	4.74583	13.6964	4.56269	23.714	1.8615	7.85703
7.97635	22.9335	3.85223	17.1352	8.13649	18.7965	27.1049	54.5755	4.89107	13.8216	6.29928	25.3393	--	--	1.01155	3.69295	12.8777	24.6684	5.42448	14.6072	4.56151	24.5037	2.37019	8.64784
8.48589	23.7172	4.19731	17.9593	8.81541	19.603	27.4437	55.3032	5.22838	14.6421	6.80407	26.1575	-0.34158	2.42788	1.17769	4.64567	13.3864	25.3865	5.593	15.4582	5.07064	25.2988	2.53842	9.50845
8.9951	24.5965	4.37216	18.8218	9.32409	20.4478	27.6118	56.1771	5.56566	15.4713	6.79821	27.0718	-0.17091	2.1947	1.51473	5.36786	13.8946	26.2918	6.10191	16.2583	5.06912	26.1901	2.70688	10.3039
9.16446	25.3655	4.54726	19.6106	10.1732	21.2418	27.9501	57.026	6.07312	16.2794	7.13306	27.8414	-0.17138	2.26242	1.85124	6.24329	14.2328	27.1438	6.61079	17.067	5.40799	27.0291	3.21547	11.1246
9.67393	26.1706	4.89226	20.4598	11.0222	22.0445	28.4587	57.85	6.24013	17.1555	7.29736	28.7395	0.16626	2.95248	2.18797	7.05748	14.401	27.9405	6.77951	17.8611	5.57663	27.905	3.38386	11.938
10.0129	27.103	5.06731	21.2635	12.0411	22.9139	28.797	58.708	6.5776	17.9271	7.63217	29.5213	0.33318	3.81972	2.52466	7.88192	14.9091	28.8693	7.45826	18.7401	5.74556	28.6963	3.55196	12.8378
10.3521	27.9528	5.07212	22.1041	12.8901	23.7346	28.9655	59.4847	7.25519	18.7305	7.62654	30.3682	0.50031	4.62864	2.86105	8.7916	15.0773	29.6788	7.96706	19.5748	6.08467	29.4638	4.23066	13.6587
11.032	28.6584	5.41704	22.9775	13.5688	24.5937	29.4739	60.3218	7.59232	19.602	8.30173	31.1022	0.83736	5.48922	3.02772	9.59133	15.586	30.4347	8.3059	20.3626	6.08303	30.3892	4.22875	14.5293
11.3708	29.6144	5.59202	23.8033	14.588	25.4021	29.8126	61.0765	8.09964	20.4524	8.46594	32.0267	1.00441	6.31948	3.53477	10.3401	15.924	31.3209	8.64443	21.2434	6.42211	31.1688	4.39703	15.3787
11.7103	30.3922	5.93718	24.6065	15.6071	26.2191	29.9803	62.0983	8.2668	21.2843	8.63046	32.8619	1.00122	7.18977	3.70111	11.2345	16.2621	32.2143	9.15314	22.1031	6.76084	32.0485	4.73575	16.1259
12.2196	31.2401	5.94189	25.4763	16.2857	27.1041	30.3189	62.861	8.77435	22.0639	8.79495	33.7029	0.99824	7.99653	4.03789	12.0311	16.6004	33.0185	9.66212	22.884	6.75978	32.8048	4.90369	17.0736
12.559	32.03	6.287	26.2937	17.3048	27.9384	30.6575	63.6271	8.94117	22.998	9.12964	34.5199	1.50561	8.79713	4.54459	12.8856	16.9388	33.8285	10.1711	23.6721	7.09847	33.6972	5.24237	17.8365
13.2385	32.8618	6.46188	27.148	18.1536	28.8111	30.8255	64.5449	9.61888	23.7629	9.46431	35.3428	1.67252	9.66753	4.7111	13.73	17.4473	34.6146	10.5095	24.5858	7.26726	34.5302	5.58074	18.6898
13.5775	33.76	6.63703	27.9199	18.8325	29.628	31.1641	65.3186	9.78594	24.624	9.79896	36.1714	1.8394	10.5482	5.04779	14.5533	17.6154	35.4657	11.0184	25.3889	7.43635	35.2722	5.91936	19.4676
14.4271	34.5765	6.98208	28.758	19.8514	30.4875	31.332	66.245	10.2934	25.4328	9.96338	37.0354	2.00677	11.2849	5.38446	15.3851	17.7835	36.3227	11.8674	26.23	7.94519	36.1542	6.08746	20.3671
14.426	35.4507	6.98667	29.6626	20.5303	31.3195	31.6706	67.0261	10.6306	26.2784	10.1281	37.805	2.00364	12.1363	5.72109	16.2256	18.292	37.1261	12.206	27.0777	7.9437	37.0342	6.42604	21.1599
15.1058	36.2122	7.16176	30.4531	21.5495	32.0994	32.0092	67.8108	11.138	27.1015	10.6326	38.7215	2.17069	12.9665	6.05769	17.0747	18.6302	37.9649	12.5446	27.9325	8.28262	37.8606	6.7643	22.0462
15.445	37.0388	7.16663	31.279	22.3985	32.916	32.1775	68.6284	11.305	27.9911	10.6271	39.5309	2.1675	13.8351	6.05413	17.9082	19.1386	38.7799	13.2236	28.7351	8.45164	38.6231	6.93261	22.8836
16.1247	37.8118	7.51157	32.1442	23.2475	33.7398	32.3454	69.5713	11.6425	28.7652	11.1318	40.3582	2.67491	14.623	6.39097	18.6893	19.1364	39.6896	13.5622	29.6042	8.62031	39.4901	7.27141	23.6107
16.6338	38.7204	7.68661	32.9526	24.0961	34.6691	32.8541	70.3375	12.1498	29.609	11.1263	41.1773	2.50173	15.4576	6.72749	19.5627	19.4749	40.4437	13.9011	30.3865	8.78896	40.3628	7.26947	24.4914
17.3131	39.6064	7.8613	33.8609	24.7751	35.4385	32.8522	71.1956	12.3167	30.5192	11.631	42.0154	2.66867	16.3215	7.23449	20.329	19.8131	41.305	14.7502	31.1802	9.29836	41.0809	7.77813	25.2901
17.9928	40.3981	8.20682	34.5571	25.4538	36.3134	33.361	71.9687	12.6541	31.3118	11.7957	42.8146	2.83586	17.1116	7.57095	21.2189	19.981	42.2017	15.259	32.0403	9.46697	41.9645	8.11656	26.1256
18.6724	41.1956	8.04138	35.4422	26.1328	37.0951	33.5292	72.8043	13.1614	32.1763	11.7897	43.7525	3.00302	17.9088	8.24781	22.058	20.4897	42.9411	15.7676	32.9075	9.80577	42.8243	8.28444	27.0886
19.1817	42.0285	8.38654	36.244	27.1519	37.9243	33.6975	73.6434	13.4987	32.9812	11.9543	44.5614	3.16987	18.797	8.41431	22.9065	20.6576	43.8487	16.1064	33.7149	9.97434	43.7195	8.45292	27.8774
20.0311	42.9114	8.56147	37.0813	27.6606	38.7478	33.8657	74.486	13.8361	33.7918	12.2891	45.3452	3.16677	19.6389	8.58078	23.7622	20.9957	44.7325	16.7853	34.566	10.1433	44.5167	8.79159	28.6424
20.5405	43.7565	8.73606	38.0216	28.3392	39.6498	34.2042	75.3026	14.1734	34.6082	12.4537	46.1632	3.33357	20.5435	8.91744	24.5954	21.3342	45.5163	17.2942	35.3559	10.3121	45.3185	8.95972	29.5353
21.22	44.5778	8.91128	38.7731	29.0178	40.559	34.5426	76.1227	14.3405	35.46	12.6179	47.0927	3.16051	21.344	9.25438	25.3454	21.5024	46.3343	17.6326	36.2799	10.6512	46.0953	9.29803	30.4057
21.5591	45.4641	9.08616	39.6276	29.8669	41.342	34.7104	77.1022	14.8476	36.3573	13.1229	47.8612	3.66797	22.1181	9.42047	26.3127	21.8408	47.1272	18.1415	37.082	10.8197	47.0116	9.63663	31.1893
22.0687	46.2206	9.26135	40.3888	30.5458	42.1603	35.2195	77.7735	15.015	37.1217	13.2874	48.6934	3.83498	22.9587	9.75737	27.0755	22.1791	47.9248	18.8206	37.8603	10.9886	47.8277	9.80501	32.0082
22.7481	47.0586	9.43585	41.354	31.0544	43.0141	35.3877	78.6336	15.3523	37.9612	13.4519	49.5303	3.83176	23.8362	9.92372	27.9661	22.1771	48.786	19.3291	38.7747	11.3276	48.6187	9.97337	32.833
23.0872	47.9616	9.4408	42.155	31.5634	43.7679	35.5558	79.4971	15.5193	38.8361	13.7866	50.3421	4.16924	24.5726	10.2606	28.7411	22.3452	49.6223	19.838	39.5948	11.3262	49.4734	10.1417	33.6635
23.5968	48.7329	9.78615	42.9014	32.072	44.6326	35.724	80.3642	15.8565	39.6872	13.9511	51.188	4.16598	25.4636	10.7673	29.5859	22.6836	50.4335	20.5173	40.2891	11.6652	50.2736	10.4802	34.4701
24.1063	49.5088	9.96093	43.7834	32.7508	45.4735	36.0624	81.2053	16.194	40.4419	14.1156	52.0385	4.3329	26.332	10.9339	30.4028	22.8517	51.2788	20.8556	41.2523	12.0038	51.1866	10.4783	35.3418
24.6155	50.3983	10.136	44.5691	33.2594	46.3497	36.2309	81.9501	16.5312	41.3039	14.2804	52.7827	4.32989	27.1463	11.4406	31.2611	23.19	52.0992	21.3644	42.0898	12.3428	51.9964	10.8168	36.1599
24.9548	51.2135	10.1406	45.4917	33.7683	47.1236	36.5693	82.7977	16.8683	42.1716	14.4448	53.6418	4.49708	27.9368	11.7774	32.0605	23.3581	52.9536	21.8731	42.9331	12.5115	52.8404	10.9851	37.0135
25.464	52.1139	10.4859	46.2574	34.4475	47.8725	36.7374	83.6782	17.2058	42.9412	14.6092	54.5054	4.66393	28.8251	12.284	32.9324	23.696	53.8945	22.2117	43.8117	12.8505	53.6594	11.1533	37.8728
25.8032	52.9388	10.6606	47.1612	34.7858	48.7944	37.0757	84.5328	17.3727	43.8494	15.1141	55.3145	4.66087	29.6574	12.6207	33.744	23.864	54.7587	22.8906	44.6369	12.8494	54.4315	11.3219	38.6382
26.1429	53.6569	11.0058	47.9366	35.4649	49.553	37.2443	85.2892	17.54	44.6583	15.2784	56.1872	4.82799	30.4658	12.7872	34.591	24.0324	55.5148	23.2295	45.4213	13.0177	55.3997	11.4901	39.5084
26.652	54.5727	11.1808	48.7462	36.1435	50.4267	37.5826	86.1503	17.8774	45.4422	15.4428	57.0645	4.9951	31.2799	12.9537	35.4438	24.3711	56.245	23.7382	46.2871	13.357	56.1206	11.6583	40.3844
26.9912	55.4114	11.3559	49.5603	36.4818	51.3653	37.9209	87.0149	18.0442	46.3665	15.6076	57.8322	4.99165	32.2242	13.2904	36.2727	24.3688	57.1512	24.2472	47.0516	13.5257	56.9868	11.8268	41.1646
27.3304	56.2546	11.5309	50.3789	37.1608	52.1388	38.0894	87.7798	18.3816	47.16	15.7719	58.718	5.32925	32.9255	13.4568	37.137	24.5368	58.0325	24.5856	47.9579	13.6947	57.7448	11.9949	42.0515
27.6697	57.1023	11.7055	51.309	37.8395	53.0293	38.2574	88.6803	18.5488	47.9877	15.9366	59.4932	5.15587	33.8163	13.7938	37.8772	24.875	58.8888	25.0946	48.7321	14.0332	58.7034	12.1634	42.8414
28.0092	57.8404	11.8804	52.1374	38.1784	53.7587	38.5957	89.5549	18.8862	48.7904	16.2712	60.358	5.3229	34.6535	13.79	38.782	24.8732	59.6934	25.4334	49.5406	14.2022	59.4693	12.3318	43.6358
28.5182	58.782	12.0554	52.9703	38.857	54.6594	38.9339	90.433	18.8831	49.6568	16.4359	61.1407	5.3197	35.5261	14.4674	39.4726	25.3819	60.413	25.942	50.4333	14.3708	60.3532	12.4999	44.5387
29.0276	59.6139	12.2303	53.8077	39.1956	55.5109	39.2726	91.1801	19.3907	50.439	16.6001	62.0436	5.65689	36.3452	14.4635	40.3884	25.3796	61.3409	26.2808	51.2514	14.3696	61.1561	12.8382	45.4178
29.1969	60.3936	12.4052	54.6497	39.8745	56.3078	39.2709	91.9885	19.5578	51.2849	16.5946	62.8633	5.65399	37.1308	14.8001	41.2506	25.548	62.127	26.6195	52.0741	14.5385	61.9331	13.007	46.122
29.7063	61.2341	12.7504	55.4667	40.2131	57.1685	39.6095	92.7407	19.8951	52.1059	16.7593	63.6569	5.82094	37.9905	15.1366	42.1187	25.7162	62.9166	27.1284	52.8718	14.8773	62.7999	12.8349	46.9944
29.8756	62.0212	12.755	56.3474	40.7222	57.8883	39.7775	93.6607	20.2324	52.9314	17.2639	64.5133	5.98787	38.8558	15.4735	42.8886	25.8841	63.8275	27.4671	53.7036	15.0459	63.7009	13.3438	47.753
30.3849	62.8703	13.1005	57.0626	41.0607	58.7575	39.9455	94.5842	20.3994	53.791	17.258	65.4629	6.15512	39.6266	15.6398	43.7971	26.0524	64.6246	28.1458	54.5931	15.2148	64.4893	13.1713	48.7414
30.724	63.7534	13.2753	57.9223	41.5689	59.7187	40.2841	95.345	20.7367	54.6256	17.5932	66.119	5.98194	40.4613	15.8064	44.6063	26.3909	65.3957	28.3143	55.4642	15.2135	65.3107	13.3397	49.5688
31.0635	64.5226	13.4502	58.7865	42.078	60.4506	40.6228	96.1083	20.7335	55.5239	17.7574	67.0471	6.14882	41.3427	16.1432	45.3904	26.5587	66.3191	28.6533	56.1969	15.3824	66.106	13.6786	50.2633
31.4025	65.4143	13.7952	59.6257	42.4164	61.3335	40.7907	97.0413	21.0708	56.3676	18.0922	67.8297	6.31602	42.1277	16.3095	46.315	26.727	67.1272	28.9915	57.1609	15.7211	66.994	13.8465	51.2079
31.9118	66.2811	13.9704	60.386	42.9255	62.0729	40.9591	97.8396	21.2381	57.1318	18.0866	68.6747	6.65342	42.8877	16.6463	47.1088	26.8952	67.9387	29.1607	57.8167	15.7198	67.8264	13.845	51.9695
32.2512	67.0617	14.1452	61.2633	43.6043	62.9054	41.1275	98.6404	21.5753	57.9841	18.4213	69.4643	6.65003	43.8147	16.6426	47.9664	26.8932	68.7833	29.6691	58.7608	15.8883	68.7524	14.1835	52.7851
32.5902	67.9666	14.1498	62.1747	43.9427	63.8014	41.2954	99.5829	21.9125	58.841	18.5859	70.2869	6.81719	44.614	16.9794	48.7694	27.061	69.7233	29.8379	59.5386	16.0571	69.5627	14.1816	53.6644
32.9296	68.7547	14.3249	62.9464	44.2811	64.7021	41.634	100.36	21.7395	59.6758	18.75	71.2354	6.81412	45.4475	17.1459	49.6065	27.5696	70.4868	30.1765	60.4063	16.226	70.3765	14.3498	54.5186
33.6091	69.6092	14.6699	63.8073	44.6199	65.4865	42.1428	101.11	22.2472	60.3959	19.0848	72.036	6.98124	46.2558	17.1426	50.3685	27.3978	71.2494	30.6853	61.2492	16.2246	71.2233	14.5184	55.2661
33.7782	70.4343	15.0153	64.5569	45.1289	66.2449	42.1404	102.092	22.0737	61.3539	19.0791	72.899	7.3182	47.1448	17.479	51.2943	27.566	72.0784	30.6838	62.0679	16.5637	72.0147	14.5165	56.1585
34.1176	71.2334	15.19	65.4559	45.4672	67.1581	42.479	102.877	22.2411	62.1405	19.4142	73.5825	7.14488	48.0221	17.6458	52.0348	27.9039	73.0049	31.0227	62.8311	16.5623	72.8684	14.8549	56.9963
34.4565	72.1594	15.5349	66.3299	45.8059	67.9536	42.6473	103.694	22.7488	62.8716	19.7485	74.5176	7.31195	48.8447	17.8123	52.8896	27.9018	73.8708	31.3612	63.716	16.7311	73.6962	14.8529	57.8978
34.7959	72.9661	15.5398	67.15	45.9744	68.782	42.9859	104.484	22.7455	63.8126	19.913	75.3616	7.47901	49.6719	17.9788	53.7489	28.2402	74.6814	31.3593	64.6645	16.8999	74.5275	15.0214	58.6607
35.3054	73.7467	15.7149	67.9442	46.6532	69.6488	43.1542	105.307	22.9127	64.6102	19.9073	76.2386	7.64642	50.3957	18.1452	54.6128	28.2385	75.4294	31.8684	65.4096	17.0686	75.3622	15.0198	59.4567
35.6448	74.5604	15.8899	68.7418	46.9919	70.4553	43.3225	106.131	23.0796	65.5302	20.2419	77.0601	7.64325	51.2611	18.1418	55.3983	28.7466	76.3424	31.6967	66.2763	17.2374	76.2005	15.1879	60.3412
35.9841	75.3775	15.8948	69.5724	47.3306	71.2652	43.4908	106.959	23.417	66.3058	20.4064	77.9146	7.81026	52.1013	18.4784	56.2412	28.5747	77.1258	32.2057	67.0284	17.4062	77.0422	15.3565	61.1151
36.1527	76.3535	16.4098	70.4374	47.8394	72.0492	43.8293	107.76	23.7545	67.0849	20.5713	78.6456	7.80706	52.9758	18.6448	57.1182	28.7428	77.9793	32.374	67.964	17.7451	77.858	15.5246	62.0081
36.4925	77.0517	16.2445	71.305	47.8377	72.925	43.9976	108.592	23.7515	67.9265	20.7357	79.5066	8.14425	53.7956	18.9818	57.8561	28.9109	78.8363	32.5426	68.7826	17.7436	78.7362	15.6931	62.7895
36.8317	77.8794	16.4195	72.1171	48.3461	73.8419	43.9952	109.601	23.9183	68.8631	20.9001	80.3711	8.31122	54.6496	19.1482	58.7417	29.2491	79.6673	32.7112	69.6047	17.9123	79.5884	15.691	63.7206
37.171	78.7105	16.7647	72.9032	48.6848	74.6664	44.3341	110.265	23.9157	69.5906	21.0645	81.2391	8.30834	55.4264	19.3146	59.6318	29.5874	80.5018	32.8798	70.4304	18.0815	80.3175	15.6892	64.539
37.5103	79.5452	16.7691	73.8732	49.0234	75.4943	44.6721	111.221	24.2527	70.5057	21.3996	81.9522	8.30507	56.3185	19.4813	60.4107	29.5857	81.2703	33.0484	71.2595	18.2502	81.1762	15.8577	65.3314
37.6793	80.4127	16.9445	74.5743	49.1918	76.3552	44.8409	111.919	24.4199	71.3322	21.3937	82.8561	8.472	57.1855	19.4778	61.2226	29.9239	82.1113	33.3872	72.0626	18.2487	82.0678	15.8559	66.1567
38.0185	81.2544	17.1194	75.4003	49.5304	77.1902	45.1793	112.735	24.5871	72.1623	21.7283	83.7046	8.63929	57.9443	19.8143	62.0958	29.9217	83.0147	33.5558	72.8987	18.588	82.776	16.1942	67.0453
38.1875	82.1289	17.294	76.3528	50.0392	77.9992	45.1768	113.758	24.7542	72.9958	21.7229	84.4851	8.46616	58.7656	19.981	62.8856	30.0901	83.7623	33.7243	73.7383	18.5864	83.6741	16.1924	67.8781
38.6969	82.9481	17.4693	77.0628	50.0378	78.7711	45.3456	114.463	25.0916	73.8034	22.0575	85.3401	8.80325	59.6157	20.1477	63.679	30.2581	84.6427	33.8929	74.5814	18.7551	84.5462	16.3608	68.685
38.8664	83.6993	17.6443	77.8993	50.3764	79.6161	45.6835	115.434	25.0885	74.6733	22.0516	86.2575	8.9705	60.3854	20.1438	64.6237	30.5963	85.4972	33.8912	75.4574	18.7539	85.3218	16.5292	69.4953
39.3758	84.5251	17.8192	78.7393	50.715	80.4645	45.8522	116.142	25.0858	75.4218	22.5568	86.9583	9.13736	61.2735	20.4806	65.3951	30.4243	86.3123	33.8895	76.337	18.9226	86.2005	16.3572	70.3681
39.5447	85.4131	17.8239	79.6123	51.2237	81.2871	46.0204	117	25.4227	76.3649	22.5509	87.8822	9.13438	62.0802	20.4771	66.2289	30.9327	87.1438	34.2287	77.0347	19.0916	86.9522	16.5256	71.1854
39.8839	86.2753	18.169	80.4298	51.392	82.1719	46.1886	117.861	25.5902	77.0898	22.7157	88.6474	9.47141	62.9474	20.6437	67.0368	30.7607	87.9644	34.227	77.9207	19.4305	87.8079	16.694	72.0062
40.2235	87.0086	18.3439	81.2802	51.5608	82.929	46.5269	118.695	25.7573	77.9438	23.0502	89.5189	9.46801	63.8782	21.1503	67.9095	31.0988	88.8319	34.5657	78.7513	19.4289	88.7259	16.6921	72.86
40.3924	87.9067	18.3486	82.1636	52.0695	83.7615	46.5249	119.59	26.0946	78.7719	23.2144	90.4233	9.63521	64.6668	21.3169	68.7249	31.4369	89.7029	34.7341	79.6149	19.4277	89.5156	17.0307	73.6582
40.5613	88.8082	18.6941	82.8647	52.2378	84.6564	46.8638	120.28	25.9212	79.6917	23.209	91.2265	9.63218	65.4885	21.3133	69.5732	31.4351	90.5026	35.0728	80.4525	19.7664	90.3813	17.0288	74.519
41.0707	89.6545	18.6987	83.7546	52.5763	85.5254	47.032	121.151	26.0883	80.5562	23.3737	92.0028	9.96955	66.2546	21.4799	70.3955	31.6035	91.2755	35.0715	81.2237	19.7653	91.1765	17.0273	75.2595
41.24	90.4288	19.0438	84.5891	52.9148	86.3979	47.3703	121.995	26.2558	81.2957	23.5384	92.7818	9.9665	67.0833	21.6465	71.2213	31.7714	92.1853	35.24	82.0972	19.9343	91.9449	17.1952	76.2215
41.5791	91.311	19.0484	85.4859	53.2537	87.1401	47.3687	122.749	26.593	82.1372	23.8728	93.6693	10.1336	67.8859	21.8126	72.1736	31.9397	92.9638	35.2382	83.0036	20.1028	92.8495	17.3635	77.0632
41.9186	92.0615	19.3939	86.1986	53.5926	87.8849	47.7071	123.597	26.76	83.0117	24.0375	94.4538	10.1302	68.8411	21.9796	72.8834	31.9378	93.7742	35.407	83.754	20.1016	93.6528	17.5318	77.9084
42.2582	92.8146	19.3985	87.1019	53.9311	88.7669	47.705	124.507	26.927	83.8896	24.0315	95.4065	10.1271	69.6807	22.1461	73.7197	32.2759	94.6642	35.5759	84.5068	20.2701	94.5639	17.5303	78.6609
42.5972	93.7062	19.5737	87.8495	53.9291	89.7111	48.0433	125.361	26.9247	84.5399	24.3664	96.1672	10.2942	70.4943	22.3127	74.5595	32.4442	95.4507	35.7443	85.3933	20.4391	95.3434	17.6986	79.5126
42.7661	94.6308	19.748	88.8602	54.0978	90.4939	48.2114	126.247	27.0917	85.4238	24.3609	96.9892	10.2911	71.3409	22.309	75.4322	32.612	96.3766	35.7425	86.3127	20.6076	96.261	17.8668	80.3678
42.9354	95.4218	19.9233	89.6138	54.4366	91.2498	48.38	126.982	27.2586	86.3112	24.5255	97.7844	10.4581	72.1614	22.6457	76.2495	32.9505	97.1394	36.0815	87.0447	20.6063	97.0754	17.8649	81.256
43.1046	96.2154	20.2687	90.3406	54.6048	92.1742	48.7183	127.843	27.4256	87.2021	24.8599	98.6908	10.6252	72.9855	22.8122	77.0998	33.289	97.9047	36.0797	87.9706	21.1157	97.8043	18.2037	81.9611
43.6139	97.0907	20.103	91.2897	54.7735	92.9651	48.7162	128.765	27.593	87.9643	25.0245	99.4916	10.7923	73.813	22.8089	77.8566	33.4568	98.8401	36.2485	88.7376	20.9442	98.6532	18.3719	82.8263
43.9534	97.8605	20.2778	92.1836	54.9416	93.8959	49.055	129.477	27.7604	88.7291	25.1892	100.295	10.7891	74.6736	23.1456	78.6839	33.6251	99.6403	36.4168	89.6406	20.9429	99.4753	18.3704	83.5959
43.7822	98.721	20.4529	92.9483	55.1103	94.6924	49.3933	130.346	27.9273	89.6295	25.3538	101.101	10.7864	75.4139	23.312	79.5442	33.6231	100.473	36.7558	90.3838	21.1118	100.271	18.5386	84.4675
44.2914	99.6058	20.6277	93.8486	55.4491	95.4621	49.3917	131.12	28.0947	90.3999	25.3477	102.078	11.1232	76.3461	23.3083	80.4374	33.7914	101.278	36.7539	91.3226	21.2802	101.207	18.7068	85.3427
44.6308	100.384	20.8028	94.6189	55.7879	96.2343	49.5597	132.022	28.0914	91.3361	25.3421	102.919	11.12	77.2171	23.6449	81.2752	33.9592	102.226	36.9227	92.1007	21.2789	102.037	18.7047	86.2507
44.6298	101.223	20.8078	95.4212	56.1262	97.1483	49.8985	132.742	28.2587	92.112	25.5067	103.733	11.4576	77.9075	23.6411	82.1753	33.9577	102.926	37.0915	92.8814	21.2776	102.87	18.8733	87.0024
44.9688	102.147	20.9825	96.331	56.2948	97.9555	50.0665	133.649	28.4261	92.8905	25.8415	104.521	11.4544	78.7849	23.808	82.9202	34.2956	103.85	37.2602	93.6646	21.4465	103.676	18.8717	87.7861
45.3082	102.933	21.1576	97.1094	56.2932	98.7946	50.0649	134.431	28.5929	93.8069	25.8363	105.227	11.6214	79.6364	23.9748	83.6677	34.4638	104.666	37.4285	94.5866	21.7855	104.455	19.2101	88.6448
45.4774	103.751	21.3327	97.8904	56.4618	99.6069	50.4031	135.314	28.5896	94.7561	26.0004	106.191	11.6181	80.5209	24.311	84.6487	34.632	105.485	37.5968	95.512	21.9539	105.406	19.208	89.5658
45.8168	104.542	21.3372	98.839	56.9708	100.363	50.5716	136.071	28.7574	95.4069	26.3351	106.986	11.6153	81.2817	24.1374	85.4611	34.8002	106.306	37.5953	96.3332	21.9526	106.25	19.2063	90.358
45.8158	105.395	21.6825	99.5962	57.3091	101.293	50.7396	136.987	28.9247	96.1961	26.3295	107.842	11.612	82.1726	24.3037	86.3482	35.1386	107.101	37.764	97.1275	21.9512	107.096	19.3749	91.1234
46.1552	106.191	21.6874	100.415	57.4776	102.113	50.7379	137.778	29.0915	97.1249	26.494	108.671	11.7794	82.9096	24.4705	87.1073	35.3068	107.927	37.9332	97.7866	22.2902	107.886	19.3728	92.0539
46.4945	106.99	21.6922	101.236	57.6457	103.078	51.0761	138.67	29.0886	97.949	26.6586	109.503	12.1161	83.8766	24.8075	87.8395	35.4749	108.756	38.1014	98.724	22.2889	108.737	19.7115	92.7954
46.6632	107.964	21.8669	102.167	57.6445	103.791	51.2441	139.593	29.5958	98.8256	26.9933	110.308	12.2835	84.6195	25.1441	88.7068	35.8133	109.558	38.0994	99.6942	22.4577	109.561	19.7094	93.7323
47.0026	108.769	22.0419	102.965	57.8125	104.762	51.4126	140.36	29.5929	99.6552	27.1578	111.146	12.2801	85.5239	25.4806	89.5775	35.981	110.537	38.2685	100.36	22.6265	110.388	19.8779	94.5088
47.1717	109.605	22.3872	103.735	58.1517	105.421	51.5811	141.129	29.5899	100.487	27.1521	112.015	12.4475	86.2724	25.6469	90.4812	35.9789	111.403	38.4367	101.307	22.6251	111.247	19.706	95.3466
47.511	110.415	22.5618	104.676	58.4904	106.225	51.7491	142.06	29.7572	101.293	27.3166	112.857	12.4441	87.1833	25.6435	91.2838	35.9773	112.127	38.6059	101.977	22.7943	111.936	20.0443	96.2343
47.6807	111.111	22.3964	105.54	58.8286	107.176	51.9176	142.832	29.9244	102.101	27.4816	113.556	12.7817	87.9079	25.8102	92.0595	36.4859	112.91	38.7741	102.93	22.9626	112.914	19.8728	96.9418
47.8493	112.101	22.9119	106.29	58.9971	108.014	52.0855	143.768	29.9215	102.941	27.6455	114.549	12.7783	88.8252	25.9769	92.8378	36.4838	113.784	38.7725	103.775	23.1319	113.607	20.211	97.8355
48.1886	112.918	22.7465	107.159	58.9954	108.885	52.254	144.544	30.2584	103.865	27.81	115.399	12.7754	89.6143	26.1432	93.754	36.6519	114.631	38.9411	104.593	23.1304	114.475	20.3795	98.6252
48.5279	113.738	23.0917	107.942	59.3345	109.554	52.4224	145.323	30.4256	104.681	27.9745	116.252	12.9422	90.5087	26.1397	94.5672	36.9902	115.451	39.1097	105.413	23.2992	115.317	20.2071	99.6134
48.8672	114.561	23.2667	108.758	59.6732	110.371	52.4207	146.132	30.5928	105.5	27.9692	116.988	12.9393	91.3033	25.966	95.4124	37.1583	116.303	39.2784	106.236	23.2977	116.191	20.5458	100.379
48.8661	115.445	23.2715	109.606	59.6715	111.249	52.929	147.018	30.76	106.321	28.1336	117.846	12.9359	92.2335	26.3024	96.3086	37.4966	117.129	39.447	107.062	23.4665	117.038	20.544	101.207
49.2054	116.272	23.4465	110.426	59.8399	112.1	52.7571	147.86	30.9272	107.145	28.1279	118.735	13.2733	92.9749	26.4691	97.1006	37.4944	118.015	39.6156	107.89	23.6352	117.888	20.7124	102.007
49.5446	117.103	23.4513	111.279	60.1785	112.925	53.0951	148.78	31.7752	107.854	28.463	119.419	13.2704	93.7776	26.6358	97.8952	37.8332	118.697	39.7841	108.721	23.6337	118.769	21.0511	102.781
49.8839	117.936	23.456	112.134	60.5172	113.752	53.4344	149.376	32.2823	108.768	28.4572	120.313	13.4372	94.6879	26.6323	98.7217	38.0007	119.708	39.7825	109.583	23.6327	119.506	21.0488	103.755
50.0529	118.8	23.631	112.963	60.5154	114.64	53.432	150.358	32.4495	109.6	28.6216	121.18	13.4342	95.4962	26.9687	99.6304	38.1693	120.424	39.9511	110.419	23.9716	120.333	21.2172	104.564
50.0523	119.547	23.8059	113.794	60.6838	115.502	53.7707	151.12	32.7868	110.405	28.786	122.05	13.6014	96.2776	26.7954	100.353	38.5075	121.262	40.1197	111.258	23.9701	121.222	20.875	105.463
50.3915	120.387	23.9809	114.627	60.682	116.395	53.7683	152.108	33.1237	111.358	28.9509	122.771	13.7681	97.1975	26.9616	101.297	38.5054	122.16	40.2882	112.099	24.309	122.055	21.0439	106.136
50.7307	121.23	23.9856	115.493	61.1913	117.054	54.1069	152.874	33.1206	112.227	28.9451	123.675	13.9353	97.9845	27.1282	102.105	38.8436	123.003	40.2866	112.971	24.308	122.8	21.382	107.063
50.8997	122.105	23.9903	116.361	61.3591	118.073	54.1051	153.7	33.4579	113.04	29.2797	124.523	14.1025	98.7741	27.465	102.886	39.0121	123.727	40.4551	113.818	24.3064	123.696	21.3802	107.911
51.2389	122.953	24.336	117.027	61.528	118.794	54.2735	154.5	33.6256	113.74	29.4446	125.251	14.2692	99.7034	27.2912	103.758	39.1801	124.604	40.6241	114.52	24.4751	124.565	21.5485	108.733
51.5787	123.652	24.3407	117.9	61.6964	119.668	54.4419	155.3	33.7927	114.587	29.6089	126.132	14.2662	100.528	27.6281	104.544	39.3481	125.484	40.7926	115.371	24.474	125.316	21.5467	109.586
51.7476	124.533	24.5156	118.746	61.6951	120.423	54.4401	156.132	33.7896	115.466	29.6031	127.046	14.4334	101.326	27.4542	105.421	39.6863	126.337	40.791	116.253	24.6427	126.19	21.8857	110.24
51.9166	125.418	24.5202	119.624	62.0336	121.273	54.9483	157.045	33.9567	116.319	29.5977	127.809	14.4303	102.155	27.9612	106.183	39.8548	127.069	41.1297	117.08	24.8113	127.066	21.8834	111.242
52.426	126.246	24.8653	120.446	62.2019	122.154	55.1167	157.852	34.2939	117.145	29.7621	128.698	14.5975	102.958	27.9576	107.035	40.0228	127.956	41.2982	117.939	24.9805	127.794	22.0517	112.073
52.2545	127.194	24.87	121.328	62.3708	122.885	55.2851	158.66	34.2913	117.884	29.9264	129.589	14.7646	103.763	28.1242	107.861	40.1907	128.845	41.1262	118.858	25.1491	128.675	22.2205	112.763
52.7644	127.874	25.0454	122.037	62.5391	123.771	55.2832	159.499	34.6281	118.863	30.0912	130.329	14.7615	104.601	28.1206	108.719	40.3592	129.583	41.4654	119.544	25.1475	129.588	22.3888	113.6
52.7632	128.798	25.3905	122.866	62.5372	124.689	55.4516	160.311	34.7956	119.577	30.0859	131.1	14.9281	105.552	28.2871	109.55	40.8676	130.419	41.6339	120.41	25.1464	130.351	22.3864	114.613
53.1028	129.511	25.3951	123.756	62.7061	125.427	55.7901	161.096	34.9627	120.442	30.2502	131.998	14.9255	106.254	28.4536	110.383	40.8653	131.345	41.6321	121.307	25.4852	131.211	22.5552	115.31
53.2717	130.41	25.5699	124.62	62.8744	126.32	56.1281	162.052	35.1297	121.309	30.2448	132.773	15.0921	107.21	28.6202	111.219	41.0338	132.089	41.8011	122.028	25.4841	131.977	22.7235	116.154
53.271	131.185	25.7448	125.486	63.0427	127.216	55.7864	162.787	35.1266	122.208	30.2388	133.706	15.4294	108	28.6165	112.087	41.2022	132.835	41.9695	122.901	25.6532	132.717	22.7216	117.029
53.6096	132.216	25.9196	126.354	63.0412	127.989	56.1249	163.577	35.4643	122.901	30.2335	134.484	15.2566	108.738	28.7835	112.783	41.3701	133.738	42.3082	123.748	25.6516	133.641	22.8899	117.879
53.9492	132.937	25.9247	127.105	63.2101	128.734	56.2927	164.568	35.6313	123.776	30.5679	135.363	15.7636	109.645	28.9495	113.772	41.538	134.644	42.1367	124.533	25.8202	134.539	23.0581	118.73
54.2888	133.66	26.0995	127.978	63.3783	129.637	56.461	165.391	35.7983	124.654	30.7327	136.117	15.7604	110.501	28.9463	114.502	41.7059	135.553	42.4753	125.384	25.9892	135.285	23.2269	119.437
54.4577	134.571	26.2749	128.703	63.887	130.484	56.7995	166.187	35.9658	125.382	30.7268	137.058	15.7573	111.359	29.1128	115.35	42.0446	136.278	42.6438	126.267	25.9876	136.217	23.0547	120.352
54.6266	135.485	26.6199	129.552	64.0552	131.392	56.9678	167.013	35.9626	126.293	31.0618	137.786	15.9243	112.19	29.1091	116.23	42.0428	137.063	42.6425	127.029	25.9864	136.995	23.223	121.211
54.796	136.243	26.4542	130.491	64.224	132.145	56.9659	167.871	36.1296	127.178	31.0558	138.733	16.0914	113.024	29.1054	117.113	42.2106	137.979	42.9806	128.041	26.3257	137.717	23.3917	121.924
54.9654	137.003	26.7997	131.192	64.5624	133.029	57.1342	168.701	36.2971	127.912	31.2206	139.494	16.2584	113.861	29.2724	117.822	42.5487	138.868	42.9793	128.807	26.1538	138.685	23.3897	122.817
55.3045	137.895	26.8043	132.107	64.561	133.816	57.3025	169.533	36.464	128.801	31.2146	140.445	16.2557	114.585	29.2686	118.709	42.5469	139.659	43.1482	129.546	26.4925	139.568	23.7281	123.654
55.4738	138.659	26.9791	132.995	64.7292	134.733	57.4708	170.367	36.631	129.693	31.2091	141.24	16.4227	115.426	29.4351	119.57	42.8855	140.394	43.3165	130.441	26.4914	140.354	23.7262	124.552
55.6427	139.584	26.9841	133.761	65.0682	135.465	57.4688	171.231	36.7985	130.434	31.7143	141.949	16.4195	116.299	29.6015	120.434	42.8831	141.348	43.3152	131.213	26.4902	141.142	23.8949	125.274
55.9817	140.483	27.3291	134.625	65.0667	136.258	57.8073	172.04	36.7952	131.36	31.3684	142.805	16.4163	117.175	29.5983	121.179	43.2217	142.087	43.6538	132.084	26.6587	142.061	23.8928	126.176
55.9809	141.282	27.5038	135.52	65.2349	137.182	58.1464	172.676	36.9627	132.104	31.5331	143.576	16.7535	117.995	29.7647	122.048	43.3901	142.856	43.8221	132.986	26.9979	142.795	23.8908	127.082
56.1502	142.054	27.5089	136.292	65.4036	137.949	58.1438	173.72	37.1296	133.005	31.6973	144.509	16.7503	118.875	29.7609	122.948	43.3877	143.817	43.8208	133.764	26.8265	143.618	24.2297	127.78
56.4892	142.959	27.5139	137.066	65.5718	138.878	58.3121	174.562	37.4672	133.724	31.862	145.283	16.9177	119.582	29.9278	123.67	43.7263	144.562	43.9896	134.515	26.995	144.544	24.2277	128.69
56.6586	143.735	27.5184	137.997	65.7405	139.649	58.4803	175.407	37.6341	134.63	31.856	146.25	17.0847	120.439	30.0942	124.546	44.0643	145.469	43.9878	135.453	27.164	145.312	24.3958	129.573
56.8279	144.513	27.6936	138.746	65.9092	140.422	58.6492	176.078	37.8016	135.382	32.0207	147.029	17.0814	121.327	30.0904	125.453	44.0624	146.275	44.1566	136.208	27.1628	146.112	24.2241	130.365
57.1669	145.425	27.6981	139.682	66.2476	141.329	58.9876	176.896	37.7983	136.322	32.0152	147.838	17.0782	122.217	30.0871	126.211	44.2307	147.055	44.4951	137.092	27.5014	147.015	24.2225	131.129
57.3362	146.207	28.2138	140.376	66.2461	142.135	58.985	177.951	37.9657	137.078	32.1799	148.62	17.0749	123.111	30.2535	127.094	44.3985	147.998	44.664	137.851	27.5002	147.819	24.7311	131.961
57.505	147.153	28.048	141.346	66.4148	142.913	59.1538	178.626	38.1326	137.994	32.3441	149.567	17.4125	123.798	30.4204	127.826	44.5668	148.781	44.8328	138.611	27.8389	148.727	24.8992	132.854
57.6743	147.939	28.2232	142.103	66.4127	143.885	59.3221	179.479	38.4702	138.725	32.3391	150.219	17.5795	124.667	30.5867	128.714	45.0756	149.508	44.8309	139.561	27.8376	149.534	24.8976	133.624
57.8436	148.726	28.3979	143.019	66.5814	144.667	59.4903	180.334	38.4668	139.674	32.333	151.199	17.7469	125.388	30.7531	129.604	44.9035	150.353	45.1694	140.455	28.0066	150.314	25.0657	134.522
58.1831	149.486	28.7428	143.908	66.9202	145.423	59.6585	181.191	38.6342	140.438	32.6679	151.959	17.7436	126.291	30.92	130.343	45.2414	151.276	45.1679	141.251	28.0048	151.288	25.2344	135.267
58.3519	150.441	28.7477	144.7	67.0883	146.372	59.6565	182.078	38.8011	141.363	32.8325	152.751	17.7403	127.196	30.9161	131.267	45.0693	152.125	45.3368	142.019	28.1737	152.072	25.2323	136.198
58.6914	151.205	28.7527	145.494	67.257	147.16	59.8252	182.76	38.7982	142.16	32.8264	153.738	17.9077	127.923	31.083	132.009	45.4078	152.889	45.505	142.949	28.3427	152.857	25.2307	136.976
58.8601	152.165	29.0981	146.231	67.2554	147.98	60.3339	183.564	38.9656	142.93	32.8209	154.562	18.2448	128.775	31.0791	132.938	45.7457	153.819	45.5036	143.75	28.1712	153.703	25.3993	137.727
59.0294	152.962	28.9329	147.057	67.4241	148.772	60.3318	184.456	39.133	143.701	32.9855	155.359	18.0712	129.716	31.0757	133.714	45.914	154.615	45.8426	144.495	28.5103	154.463	25.5673	138.636
59.0284	153.79	29.2777	147.958	67.5927	149.565	60.5	185.321	39.2998	144.635	32.98	156.187	18.2386	130.45	31.242	134.618	46.0823	155.413	46.0108	145.432	28.5091	155.284	25.395	139.606
59.1977	154.591	29.4528	148.73	67.931	150.497	60.6682	186.188	39.6373	145.381	33.1446	156.988	18.4054	131.338	31.4089	135.368	46.2505	156.213	46.0094	146.239	28.678	156.076	25.904	140.304
59.5371	155.364	29.4572	149.693	67.7592	151.352	60.6667	186.906	39.6339	146.349	33.139	157.819	18.7425	132.199	31.5752	136.277	46.248	157.211	46.1776	147.181	28.6761	157.065	25.9024	141.092
59.7064	156.168	29.8026	150.44	68.098	152.123	60.8349	187.777	39.8013	147.128	33.3036	158.624	18.7397	132.967	31.742	137.032	46.4163	158.014	46.3469	147.8	28.845	157.862	26.0704	142.011
60.0453	157.112	29.8075	151.247	68.0964	152.953	61.003	188.649	39.968	148.071	33.4682	159.43	18.7363	133.892	31.9082	137.945	46.925	158.762	46.5151	148.746	29.0139	158.66	26.0688	142.802
60.2145	157.92	29.9826	152.026	68.265	153.756	61.3414	189.493	40.1354	148.855	33.4626	160.266	18.9036	134.635	31.9048	138.733	47.0932	159.57	46.5136	149.561	29.0126	159.49	26.2368	143.726
60.3837	158.73	30.1572	152.97	68.4331	154.728	61.3393	190.398	40.1325	149.669	33.6272	161.076	19.071	135.38	32.0711	139.651	47.2614	160.379	46.8526	150.319	29.0113	160.321	26.2351	144.521
60.553	159.542	30.3323	153.753	68.4314	155.564	61.5081	191.094	40.2998	150.456	33.6216	161.916	19.2378	136.282	32.0677	140.442	47.5993	161.329	47.0207	151.271	29.1802	161.125	26.4037	145.289
60.7222	160.355	30.3372	154.567	68.6	156.372	61.6762	191.973	40.4671	151.244	33.6155	162.927	19.5748	137.157	32.2345	141.207	47.5973	162.171	47.1895	152.062	29.3491	161.931	26.402	146.089
61.0616	161.141	30.5118	155.518	68.7692	157.015	61.8443	192.853	40.6339	152.199	33.78	163.743	19.5719	137.938	32.231	142.002	47.7655	162.986	47.0178	152.914	29.5174	162.906	26.57	147.021
61.06	162.157	30.6869	156.307	68.9372	157.995	62.0131	193.553	40.8011	152.991	33.9446	164.56	19.7387	138.847	32.3973	142.929	47.9337	163.803	47.3567	153.679	29.516	163.744	26.7385	147.795
61.3994	162.947	30.6918	157.127	68.9356	158.838	62.1812	194.437	40.9684	153.785	33.939	165.408	19.7358	139.631	32.564	143.699	48.1019	164.622	47.5248	154.641	29.6849	164.556	26.7369	148.6
61.5686	163.768	30.8669	157.919	69.1041	159.654	62.1791	195.351	40.9655	154.61	34.2738	166.199	20.0727	140.516	32.5606	144.499	48.2701	165.442	47.6935	155.439	29.6835	165.398	26.7346	149.568
61.7378	164.591	30.8717	158.743	69.2727	160.471	62.3472	196.239	41.4732	155.35	34.2681	167.051	20.0698	141.304	32.7268	145.433	48.4383	166.264	48.0324	156.211	29.6827	166.073	26.9031	150.347
61.907	165.415	31.2164	159.675	69.4412	161.291	62.5159	196.944	41.2995	156.374	34.4332	167.704	20.0669	142.094	32.7233	146.238	48.6065	167.088	48.2006	157.179	30.0212	167.03	26.9014	151.158
62.0761	166.242	31.0511	160.532	69.78	162.083	62.684	197.835	41.637	157.147	34.5972	168.701	20.4039	142.986	32.7199	147.045	48.6045	167.943	48.199	158.013	30.0198	167.877	27.0699	151.941
62.0751	167.099	31.3964	161.303	69.7783	162.935	62.8527	198.543	41.9744	157.921	34.5915	169.558	20.5711	143.75	32.886	147.986	48.9428	168.741	48.5379	158.79	30.1887	168.698	27.2379	152.889
62.4145	167.9	31.5714	162.105	69.7766	163.789	63.0201	199.621	41.9715	158.755	34.5859	170.416	20.5682	144.546	33.0528	148.767	48.9408	169.6	48.5364	159.627	30.1873	169.549	27.4063	153.676
62.5836	168.731	31.5763	162.938	70.1154	164.586	63.1888	200.332	42.1387	159.563	34.5802	171.277	20.7349	145.473	33.3897	149.521	49.2792	170.402	48.7056	160.268	30.3561	170.373	27.2344	154.523
62.923	169.536	31.9215	163.714	70.2833	165.586	63.3569	201.229	42.3054	160.539	34.9155	171.908	20.9022	146.244	33.216	150.364	49.2771	171.264	48.8737	161.248	30.3547	171.227	27.5731	155.285
62.7517	170.429	31.9258	164.718	70.2822	166.274	63.3554	201.972	42.303	161.211	35.08	172.743	20.8987	147.205	33.3827	151.15	49.6155	172.069	49.0423	162.061	30.5235	172.055	27.5713	156.106
62.9209	171.266	32.271	165.498	70.4507	167.106	63.5234	202.872	42.2994	162.221	34.7339	173.666	20.8957	148.009	33.3792	151.968	49.9538	172.877	49.211	162.876	30.6929	172.712	27.7392	157.066
63.2602	172.076	32.446	166.309	70.6192	167.939	63.8623	203.559	42.6369	163.007	34.8984	174.504	21.2331	148.756	33.3751	152.951	50.122	173.715	49.5498	163.664	30.6909	173.744	28.0779	157.833
63.4293	172.917	32.4508	167.151	70.6175	168.804	63.8601	204.492	42.6339	163.852	35.0629	175.344	21.2302	149.562	33.5418	153.743	50.2901	174.555	49.5483	164.511	30.8603	174.405	28.0761	158.66
63.7686	173.73	32.6258	167.966	70.786	169.641	64.0282	205.397	42.8011	164.671	35.0572	176.215	21.3968	150.504	33.5383	154.567	50.1178	175.455	49.7163	165.502	31.029	175.239	28.0744	159.489
63.7675	174.603	32.8008	168.783	70.9544	170.48	64.3671	206.089	42.9683	165.491	35.0515	177.087	21.564	151.286	33.705	155.362	50.4561	176.269	49.8855	166.154	31.1978	176.075	28.2428	160.291
63.767	175.303	32.9759	169.601	70.9527	171.35	64.3649	207.026	43.1354	166.312	35.3862	177.904	21.3908	152.127	33.8711	156.326	50.7944	177.086	50.2237	167.12	31.366	177.086	28.4107	161.261
64.276	176.268	32.9806	170.45	71.2914	172.164	64.7037	207.72	43.1324	167.165	35.3805	178.78	21.558	152.913	34.0383	156.959	50.7923	177.962	50.2221	167.975	31.1943	177.984	28.2392	161.958
64.4451	177.117	33.1556	171.272	71.2896	173.037	64.7016	208.661	43.1294	168.019	35.2051	179.511	21.7247	153.863	34.0342	157.956	50.9604	178.811	50.3913	168.631	31.3637	178.652	28.7481	162.707
64.4439	177.998	33.3306	172.096	71.4587	173.708	64.7	209.415	43.637	168.788	35.5398	180.332	21.8919	154.652	34.0306	158.789	51.1285	179.662	50.5599	169.46	31.5324	179.495	28.9159	163.684
64.6136	178.674	33.3354	172.95	71.6266	174.731	64.6978	210.359	44.1446	169.559	35.7043	181.184	21.8889	155.472	34.3675	159.565	51.2972	180.338	50.5577	170.493	31.531	180.369	28.9141	164.524
64.7827	179.529	33.5103	173.777	71.6254	175.434	65.036	211.247	43.9713	170.448	35.8687	182.038	21.8858	156.294	34.1937	160.43	51.6349	181.339	50.7263	171.326	31.6997	181.215	28.7421	165.395
64.9518	180.385	33.6853	174.606	71.9641	176.256	65.2046	211.976	43.9683	171.31	35.6933	182.774	22.2232	157.06	34.3603	161.238	51.6334	182.047	51.0657	171.959	31.6982	182.093	29.0807	166.18
64.9506	181.272	33.8603	175.437	72.1325	177.109	65.3726	212.896	43.9652	172.173	35.8578	183.631	22.0494	158.079	34.3567	162.078	51.8015	182.905	51.0634	172.998	32.0378	182.738	29.0789	167.026
65.2899	182.103	34.2054	176.241	72.3009	177.964	65.371	213.657	44.3026	172.98	35.852	184.519	22.3867	158.849	34.5234	162.89	51.7993	183.793	51.4028	173.634	32.0363	183.619	29.5877	167.786
65.4595	182.787	34.2101	177.104	72.2991	178.849	65.539	214.58	44.4697	173.818	36.0164	185.38	22.5539	159.649	34.69	163.704	52.1376	184.625	51.4006	174.677	32.0348	184.501	29.5858	168.635
65.628	183.828	34.3851	177.94	72.2973	179.737	65.5374	215.343	44.4667	174.686	36.0107	186.271	22.5508	160.48	34.8566	164.52	52.3056	185.488	51.7399	175.316	32.2035	185.357	29.584	169.485
65.7976	184.515	34.56	178.778	72.8068	180.361	65.7061	216.079	44.6344	175.354	36.1757	186.957	22.718	161.284	35.0232	165.338	52.4737	186.353	51.7383	176.188	32.202	186.243	29.7523	170.309
65.9667	185.381	34.7349	179.618	72.9752	181.222	66.2144	216.949	44.8009	176.371	36.1699	187.851	22.5447	162.148	35.0196	166.186	52.6417	187.219	52.077	177.005	32.5415	186.895	29.9207	171.134
65.9655	186.279	34.9099	180.46	72.9734	182.115	66.2122	217.908	44.9686	177.041	36.3343	188.719	22.882	162.926	34.8458	167.066	52.8104	187.908	52.2455	177.852	32.3698	187.813	29.9188	171.99
66.1351	186.969	35.0848	181.303	73.1418	182.98	66.3808	218.647	44.9655	177.916	36.1589	189.466	23.0492	163.735	35.1825	167.859	53.1486	188.749	52.2439	178.73	32.7087	188.646	30.0872	172.819
66.3042	187.841	35.0895	182.177	73.1399	183.876	66.5487	219.581	45.1326	178.765	36.4935	190.308	23.2157	164.714	35.1789	168.713	53.4868	189.591	52.5826	179.551	32.7071	189.539	30.2555	173.65
66.4732	188.714	35.4346	182.995	73.3089	184.565	66.7173	220.323	45.1295	179.644	36.4877	191.209	23.5536	165.33	35.1753	169.569	53.4846	190.493	52.7511	180.404	32.7062	190.255	30.4239	174.482
66.8124	189.561	35.4393	183.873	73.4773	185.435	66.8859	221.066	45.4668	180.466	36.6521	192.083	23.5499	166.342	35.5121	170.368	53.6526	191.368	52.9196	181.258	33.0451	191.093	30.2518	175.375
66.8112	190.467	35.7844	184.694	73.6457	186.307	66.8836	222.032	45.4637	181.349	36.8171	192.778	23.5468	167.188	35.6786	171.198	53.8213	192.064	53.0881	182.114	33.0435	191.991	30.5903	176.181
67.151	191.135	35.9592	185.546	73.9843	187.152	67.0522	222.778	45.6314	182.027	36.641	193.713	23.5437	168.035	35.5048	172.088	53.9893	192.942	53.4268	182.943	33.2122	192.861	30.5884	177.048
67.4896	192.168	35.7943	186.282	73.983	187.875	67.2201	223.719	45.7985	182.884	36.6358	194.44	23.881	168.827	35.5011	172.951	54.3275	193.793	53.2555	183.683	33.3808	193.734	30.7567	177.888
67.6592	192.868	35.9692	187.137	73.811	188.81	67.3887	224.467	45.9655	183.743	36.9704	195.291	24.2183	169.619	35.8378	173.757	54.3259	194.522	53.5942	184.515	33.3799	194.456	30.7554	178.584
67.8281	193.752	36.1447	187.817	74.1495	189.66	67.5572	225.217	45.9624	184.632	37.1347	196.174	24.2151	170.472	35.8348	174.45	54.4939	195.405	53.7627	185.378	33.3783	195.361	31.0933	179.572
67.9977	194.455	36.3189	188.853	74.3179	190.54	67.7251	226.162	46.2996	185.465	37.1289	197.087	24.3822	171.298	36.0013	175.289	54.6618	196.29	53.9312	186.243	33.547	196.238	31.092	180.271
67.9965	195.371	36.154	189.594	74.4868	191.24	67.5533	226.972	46.1269	186.208	37.1236	197.818	24.2088	172.183	35.997	176.333	54.8298	197.177	54.0996	187.109	33.8864	196.907	31.2597	181.293
68.3357	196.231	36.499	190.427	74.4849	192.153	67.8914	227.892	46.2933	187.253	37.288	198.706	24.7163	172.954	36.1641	177.001	54.9984	197.882	54.2687	187.798	33.8848	197.816	31.5987	181.937
68.5046	197.122	36.6739	191.291	74.4837	192.884	68.0599	228.647	46.461	187.941	37.4529	199.411	24.7131	173.814	36.1604	177.874	55.1663	198.772	54.4372	188.668	33.8832	198.727	31.5968	182.816
68.6742	197.83	37.0189	192.128	74.652	193.771	68.0583	229.431	46.628	188.81	37.447	200.331	24.8802	174.647	36.3269	178.72	55.3343	199.664	54.6056	189.539	34.0525	199.429	31.7651	183.667
68.6729	198.752	37.0235	193.025	74.8209	194.476	68.3964	230.356	46.795	189.68	37.6114	201.223	24.8776	175.338	36.4934	179.567	55.3327	200.402	54.774	190.412	34.0509	200.343	31.7631	184.55
68.8425	199.463	37.0288	193.743	74.9886	195.55	68.3947	231.143	46.6223	190.43	37.4359	201.99	25.044	176.347	36.6599	180.417	55.5006	201.297	54.7723	191.316	34.2201	201.047	31.7618	185.257
69.1816	200.331	37.3738	194.585	74.9873	196.287	68.5632	231.902	46.9595	191.275	37.6002	202.886	25.0409	177.214	36.6562	181.297	55.6685	202.194	55.1115	191.983	34.3881	202.12	31.93	186.114
69.3506	201.23	37.2082	195.515	74.9854	197.21	68.7311	232.861	47.1265	192.151	37.5949	203.627	25.2079	178.054	36.8227	182.15	55.8365	203.092	55.28	192.861	34.5573	202.827	32.0983	186.972
69.3493	202.16	37.5532	196.361	75.1543	197.92	68.5592	233.68	47.4637	192.999	37.7592	204.526	25.3755	178.721	36.8196	182.857	56.005	203.807	55.4484	193.741	34.5563	203.564	32.4367	187.804
69.689	202.847	37.7286	197.056	75.3226	198.817	68.8972	234.613	47.4611	193.726	37.5838	205.298	25.5425	179.564	36.986	183.713	56.5134	204.651	55.4466	194.652	34.7249	204.458	32.6049	188.666
70.0281	203.722	37.9034	197.933	75.3213	199.559	69.0658	235.377	47.6281	194.607	37.9183	206.171	25.7095	180.409	37.1525	184.571	56.3415	205.425	55.6156	195.353	34.7232	205.382	32.6029	189.559
70.0268	204.656	38.0782	198.813	75.4896	200.459	69.2343	236.143	47.7951	195.489	37.913	206.917	25.8765	181.256	37.1487	185.46	56.5094	206.331	55.784	196.238	34.7222	206.123	33.1116	190.366
70.3666	205.348	38.0828	199.723	75.8281	201.332	69.573	236.881	47.7919	196.402	37.907	207.851	25.8733	182.133	36.9754	186.201	56.5077	207.079	56.1226	197.096	35.061	206.993	33.1096	191.263
70.5355	206.257	38.2582	200.423	75.8268	202.078	69.5706	237.877	47.9595	197.105	37.9017	208.6	25.87	183.013	37.312	187.035	56.8458	207.958	56.1215	197.83	35.2295	207.894	33.2784	191.952
70.5348	207.008	38.7734	201.25	75.995	202.983	69.5689	238.676	48.1264	197.993	38.2362	209.479	25.8674	183.717	37.3083	187.929	57.0137	208.868	56.46	198.691	35.0583	208.667	33.6168	192.794
70.8739	207.891	38.6077	202.194	76.1633	203.89	69.7374	239.446	48.294	198.698	38.4005	210.39	26.204	184.718	37.4747	188.795	57.0121	209.621	56.4582	199.612	35.2275	209.385	33.785	193.666
71.213	208.776	38.6129	202.927	75.9918	204.669	69.9052	240.418	48.2908	199.618	38.2249	211.171	26.2014	185.426	37.3013	189.542	57.1806	210.346	56.7974	200.292	35.2258	210.319	33.783	194.569
71.3825	209.503	38.9579	203.788	76.3302	205.55	70.0737	241.192	48.6279	200.481	38.3899	211.896	26.3683	186.283	37.4678	190.412	57.518	211.42	56.9658	201.187	35.3943	211.226	33.9512	195.445
71.3811	210.449	38.9624	204.708	76.3289	206.303	70.072	241.995	48.6247	201.405	38.3839	212.84	26.5353	187.142	37.2938	191.341	57.5163	212.177	57.3044	202.055	35.7337	211.918	34.12	196.142
71.3804	211.207	39.308	205.387	76.8382	206.97	70.4107	242.742	48.9625	202.087	38.3786	213.596	26.532	188.031	37.631	192.005	57.855	212.877	57.4727	202.954	35.5618	212.886	34.1179	197.05
71.7195	212.099	39.3125	206.31	76.666	207.942	70.4089	243.547	48.9592	203.013	38.5428	214.514	26.5294	188.744	37.7974	192.88	57.8527	213.825	57.4715	203.697	35.9012	213.581	34.2867	197.749
71.889	212.83	39.317	207.235	77.1746	208.801	70.4065	244.555	49.297	203.698	38.5375	215.273	26.8665	189.579	37.9638	193.756	58.1914	214.528	57.4697	204.628	36.0697	214.494	34.4549	198.631
71.8876	213.783	39.6626	207.919	77.1732	209.559	70.7452	245.306	49.1235	204.656	38.7017	216.194	27.0334	190.444	37.96	194.663	58.0188	215.508	57.8088	205.316	36.0686	215.25	34.623	199.515
72.0571	214.517	39.8373	208.818	77.1713	210.508	70.9136	246.086	49.1208	205.401	38.8659	217.117	27.0308	191.161	37.9568	195.39	58.3575	216.213	57.9772	206.221	36.0669	216.195	34.7918	200.218
72.3962	215.415	40.1829	209.504	77.5103	211.21	71.0821	246.868	49.4579	206.276	39.0308	217.851	27.3673	192.181	37.953	196.301	58.3552	217.168	58.3157	207.099	36.2361	216.924	34.9599	201.106
72.3954	216.181	40.1874	210.436	77.3381	212.191	71.0797	247.882	49.6249	207.182	38.8552	218.644	27.3646	192.901	38.12	197.002	58.5236	217.905	58.1443	207.878	36.4046	217.844	35.1281	201.995
72.5642	217.111	40.3621	211.34	77.6771	212.896	71.4183	248.637	49.6222	207.931	38.8499	219.409	27.3613	193.802	38.1161	197.915	58.6915	218.834	58.4828	208.759	36.4028	218.794	35.2962	202.886
72.7337	217.851	40.3672	212.088	77.8453	213.822	--	--	49.7891	208.84	39.1843	220.309	27.6984	194.647	38.2825	198.802	58.8599	219.573	58.4815	209.511	36.4017	219.556	35.465	203.594
73.0727	218.755	40.7121	212.967	77.844	214.588	71.4166	249.451	50.1268	209.534	39.0087	221.106	27.6951	195.552	38.2793	199.536	59.0277	220.506	58.9903	210.367	36.7411	220.261	35.6331	204.488
73.072	219.526	41.057	213.847	77.6717	215.575	72.0977	249.54	49.9533	210.503	39.1729	222.038	28.0328	196.219	38.4457	200.425	59.3664	221.219	58.989	211.122	36.7393	221.217	35.8012	205.384
73.2408	220.462	41.0621	214.599	78.1809	216.256	71.4172	249.859	50.1208	211.229	39.1675	222.808	28.0295	197.127	38.612	201.317	59.364	222.183	59.3275	212.009	36.9085	221.953	35.7997	206.126
73.24	221.236	41.0673	215.352	78.1796	217.025	71.5884	249.83	50.2877	212.144	39.5019	223.715	28.0261	198.037	38.4386	202.083	59.5325	222.927	59.3262	212.767	37.0769	222.883	35.9678	207.025
73.4095	221.982	41.4121	216.237	78.1775	217.988	71.7596	249.801	50.4552	212.872	39.3263	224.517	28.1936	198.738	38.6049	202.978	59.8705	223.838	59.6647	213.658	37.0758	223.651	36.3068	207.711
73.5782	222.923	41.2464	217.211	78.3463	218.731	71.7606	249.801	50.6221	213.79	39.4911	225.262	28.5307	199.593	38.6017	203.718	59.8687	224.613	59.833	214.579	37.2442	224.583	36.645	208.584
73.5775	223.7	41.7621	217.881	78.5145	219.668	71.9318	249.773	50.4492	214.578	39.6553	226.202	28.3578	200.353	38.9382	204.587	60.0372	225.361	60.0013	215.503	37.2431	225.354	36.6429	209.517
73.9165	224.616	41.7666	218.829	78.6833	220.414	71.9328	249.773	50.9564	215.443	39.4797	227.007	28.524	201.424	38.7647	205.359	60.0347	226.334	60.1702	216.237	37.4122	226.097	36.6414	210.265
74.0859	225.367	41.9412	219.75	78.8521	221.16	71.9338	249.773	50.7835	216.233	39.6438	227.951	28.6915	202.13	39.1013	206.231	60.2032	227.084	60.3391	216.972	37.7509	227.005	36.8095	211.173
74.0851	226.147	42.1165	220.482	79.0202	222.102	72.1051	249.744	50.9504	217.158	39.9789	228.672	28.8583	203.021	38.9278	207.006	60.5411	228.002	60.5074	217.9	37.9199	227.751	36.9776	212.082
74.4241	227.068	42.1216	221.244	79.0188	222.88	72.2756	249.919	50.9476	217.923	39.9734	229.452	28.6854	203.787	39.0941	207.91	60.5394	228.784	60.8465	218.609	38.0884	228.692	36.9761	212.834
74.4226	228.047	42.4664	222.141	79.3571	223.797	72.2766	249.919	51.2847	218.822	39.968	230.234	29.0224	204.652	39.2604	208.816	60.878	229.509	61.0147	219.541	37.917	229.497	37.315	213.529
74.4225	228.636	42.6417	222.877	79.3557	224.577	72.2776	249.919	51.6217	219.723	40.1322	231.183	29.0197	205.392	39.4273	209.537	60.8755	230.49	61.183	220.474	38.2563	230.218	37.3128	214.471
74.7614	229.561	42.6461	223.834	79.3536	225.554	72.2786	249.919	51.4488	220.52	40.297	231.938	29.3567	206.26	39.4234	210.475	61.2141	231.218	61.3519	221.215	38.4247	231.163	37.3107	215.416
74.7606	230.348	42.6512	224.601	79.6926	226.28	72.2796	249.919	51.6163	221.261	39.9511	232.781	29.3533	207.188	39.5903	211.198	61.3819	232.172	61.5208	221.958	38.4235	231.943	37.6496	216.115
74.93	231.107	42.996	225.505	79.6911	227.064	72.4508	249.89	51.7831	222.196	40.2854	233.706	29.3505	207.932	39.5871	211.951	61.3801	232.961	61.689	222.896	38.4224	232.725	37.8176	217.034
75.0988	232.066	43.1713	226.246	79.689	228.046	72.4518	249.89	52.1207	222.91	40.28	234.494	29.6876	208.806	39.7533	212.865	61.5485	233.721	62.0281	223.613	38.761	233.646	37.9863	217.765
75.2682	232.828	43.1756	227.209	80.028	228.775	72.4528	249.89	52.1173	223.877	40.2746	235.283	29.855	209.523	39.7494	213.81	61.7162	234.68	62.1963	224.554	38.7598	234.43	38.1543	218.687
75.4369	233.789	43.3509	227.953	80.1967	229.534	72.4538	249.89	52.2848	224.623	40.6089	236.213	30.0218	210.429	39.9163	214.538	62.0548	235.415	62.3645	225.496	38.9282	235.383	38.1528	219.449
75.7764	234.525	43.8659	228.834	80.1946	230.521	72.6251	249.862	52.282	225.398	40.6034	237.004	30.019	211.177	39.913	215.296	62.053	236.208	62.534	226.051	39.0973	236.142	38.3208	220.374
75.7756	235.32	44.0412	229.58	80.1932	231.311	72.4558	249.89	52.619	226.312	40.7682	237.768	30.0156	212.115	39.909	216.245	62.3909	237.143	62.7016	227.192	39.0961	236.929	38.4894	221.11
75.9443	236.286	43.876	230.385	80.5321	232.045	72.6271	249.862	52.6162	227.09	40.7627	238.561	30.0128	212.866	40.0753	217.167	62.2189	237.967	62.8704	227.944	39.0949	237.719	38.4872	222.067
76.1137	237.054	44.2208	231.299	80.7008	232.809	72.7983	249.833	52.6135	227.87	40.7566	239.555	30.3498	213.75	40.072	217.93	62.5575	238.707	63.0393	228.698	39.4335	238.649	38.6559	222.805
76.1128	237.853	44.2258	232.078	80.6987	233.802	72.7993	249.833	52.9504	228.788	40.7512	240.351	30.1761	214.721	40.0686	218.693	62.5549	239.704	63.2075	229.648	39.6018	239.61	39.1643	223.68
76.2815	238.824	44.5705	232.995	80.527	234.626	72.9705	249.804	53.1172	229.737	41.0861	241.091	30.5137	215.419	40.2349	219.62	62.8935	240.446	63.5465	230.375	39.6006	240.403	38.9925	224.478
76.4509	239.596	44.5756	233.776	80.8659	235.365	72.8013	249.833	53.1151	230.325	41.08	242.089	30.6805	216.336	40.4017	220.357	62.8917	241.246	63.7153	231.132	39.7696	241.168	39.3307	225.384
76.2798	240.426	44.7508	234.53	81.034	236.333	73.1427	249.776	53.1116	231.305	41.2447	242.86	30.6777	217.094	40.058	221.181	63.0593	242.22	63.8835	232.087	39.9387	241.935	39.3291	226.156
76.6194	241.172	44.9253	235.481	81.0325	237.132	73.1437	249.776	53.279	232.062	41.069	243.69	30.6742	218.043	40.3944	222.084	63.3979	242.965	64.0523	232.847	39.9375	242.732	39.6673	227.066
76.6185	241.977	45.2707	236.208	81.2012	237.904	72.9745	249.804	53.4458	233.017	41.2337	244.464	30.8416	218.775	40.5613	222.825	63.396	243.769	64.3914	233.579	39.9356	243.729	39.6657	227.841
76.9574	242.926	45.4453	237.162	81.5401	238.648	72.9755	249.804	53.443	233.806	41.3985	245.238	31.1785	219.669	40.5573	223.788	63.5644	244.546	64.3893	234.568	40.1046	244.499	40.0046	228.559
76.9565	243.733	45.4503	237.95	81.5379	239.651	72.8063	249.833	53.7806	234.538	41.3923	246.244	31.3459	220.403	40.5539	224.561	63.732	245.525	64.7284	235.302	40.2736	245.271	40.1725	229.502
77.2961	244.484	45.6255	238.71	81.5364	240.455	73.1477	249.776	53.7778	235.328	41.3868	247.05	31.3424	221.359	40.891	225.276	63.9004	246.304	64.7263	236.294	40.2717	246.272	40.3405	230.447
77.2945	245.495	45.6298	239.697	81.7051	241.231	73.1488	249.776	53.9445	236.289	41.5515	247.828	31.3396	222.125	41.0572	226.216	64.0687	247.085	65.0653	237.031	40.7811	246.989	40.3389	231.227
77.634	246.249	45.9752	240.431	81.8738	242.009	73.1498	249.776	54.2821	237.025	41.8864	248.579	31.507	222.863	41.224	226.963	64.237	247.866	65.2341	237.799	40.6096	247.822	40.5075	231.979
77.8033	247.032	46.1504	241.194	82.0418	242.989	73.321	249.747	54.2786	238.018	--	--	31.8439	223.765	41.22	227.934	64.2345	248.88	65.4022	238.766	40.7786	248.598	40.6754	232.928
77.8018	248.048	46.1553	241.988	82.2105	243.769	73.1518	249.776	54.2758	238.814	41.71	249.619	31.8404	224.727	41.3868	228.684	--	--	65.4008	239.565	--	--	40.6738	233.712
78.1413	248.805	46.3299	242.953	81.8685	244.637	73.3223	249.951	54.6134	239.553	42.0477	249.562	32.0077	225.469	41.3835	229.463	64.4028	249.664	65.7398	240.307	40.7774	249.404	40.8424	234.468
--	--	46.505	243.72	82.2074	245.39	72.9836	249.804	54.6105	240.351	41.874	249.793	32.0048	226.241	41.3794	230.439	64.403	249.867	65.9079	241.279	40.7775	249.808	41.011	235.225
78.1411	249.416	46.5093	244.717	82.2052	246.406	73.3243	249.951	54.7772	241.322	42.0415	249.764	32.3417	227.15	41.5462	231.193	64.7436	250.014	66.0767	242.053	40.779	249.808	41.0087	236.209
77.9707	250.057	46.6845	245.487	82.5441	247.162	73.6664	249.69	54.9446	242.094	42.038	249.967	32.1687	227.953	41.5428	231.976	64.7445	250.014	66.2455	242.827	41.1202	249.952	41.3475	236.94
78.4831	249.971	46.8596	246.258	82.7127	247.948	73.1561	249.98	54.9417	242.895	42.036	249.764	32.6758	228.836	41.5388	232.957	64.9155	249.985	66.4136	243.804	41.2927	249.722	41.3458	237.73
78.8254	249.914	47.0348	247.03	82.7112	248.764	73.328	249.747	54.9389	243.698	42.0332	249.764	32.6729	229.613	41.5354	233.742	64.7462	250.014	66.7526	244.553	41.2942	249.722	41.5137	238.69
78.8273	249.914	47.2092	248.004	--	--	73.4985	249.922	54.9354	244.703	42.2007	249.736	32.67	230.392	41.8717	234.669	64.7471	250.014	66.9213	245.331	41.1248	249.952	41.8525	239.425
78.8292	249.914	47.2142	248.807	83.0494	249.728	73.4995	249.922	55.2729	245.451	42.1979	249.736	32.8367	231.337	41.8683	235.457	65.0884	249.956	66.9192	246.341	41.2972	249.722	42.0204	240.388
79.0013	249.885	--	--	82.8804	249.757	73.5012	249.718	55.4402	246.229	42.1952	249.736	32.8338	232.118	41.8649	236.247	64.919	249.985	67.4284	247.065	41.4682	249.895	42.0187	241.183
79.1733	249.856	47.5595	249.555	83.0511	249.932	73.6718	249.894	55.6069	247.21	42.1917	249.938	33.0004	233.067	42.0317	237.009	64.9199	249.985	67.5971	247.847	41.4697	249.895	42.1873	241.95
79.3454	249.828	47.2254	250.015	83.2226	249.904	73.843	249.865	55.6047	247.817	42.3592	249.91	33.1677	233.821	42.0283	237.8	65.091	249.956	67.7659	248.63	41.4712	249.895	42.3558	242.718
79.3473	249.828	47.7437	249.929	83.0536	249.932	73.6738	249.894	55.7714	248.801	42.1862	249.938	33.1648	234.606	42.0242	238.792	65.2621	249.928	--	--	41.4727	249.895	42.5237	243.687
79.3492	249.828	47.9216	249.9	83.225	249.904	73.845	249.865	--	--	42.3537	249.91	33.3314	235.559	42.191	239.557	65.263	249.928	67.7637	249.646	41.6444	249.866	42.6922	244.458
79.6908	249.975	48.0995	249.871	83.056	249.932	73.846	249.865	55.9387	249.584	42.1807	249.938	33.4988	236.318	42.1875	240.353	65.2631	250.131	67.7643	249.85	41.6459	249.866	42.8608	245.23
79.5224	250.003	48.1065	250.073	83.397	250.08	73.847	249.865	56.1081	249.758	42.3482	249.91	33.666	237.077	42.1841	241.149	65.4349	249.899	68.2763	249.764	41.6475	249.866	42.8591	246.032
79.5243	250.003	48.1141	250.073	83.3982	250.08	73.848	249.865	56.1073	249.961	42.5156	249.881	33.6631	237.866	42.5204	242.089	65.4351	250.102	68.2769	249.967	41.9894	249.809	43.0269	247.008
79.6964	249.975	48.1218	250.073	83.5696	250.051	74.0192	249.836	56.1072	249.961	42.5129	249.881	33.6595	238.855	42.5169	242.889	65.4367	249.899	68.2782	249.967	41.8207	249.837	43.1955	247.784
79.6983	249.975	48.4699	250.015	83.4006	250.08	74.0202	249.836	56.2772	249.933	42.3399	249.91	33.8268	239.618	42.5135	243.689	65.6078	249.87	68.4497	249.939	41.8222	249.837	43.364	248.561
80.0405	249.917	48.4776	250.015	83.4019	250.08	74.0212	249.836	56.2771	249.933	42.5074	249.881	33.8239	240.411	42.6802	244.462	65.6086	249.87	68.6212	249.91	41.9939	249.809	--	--
79.8722	249.946	48.4852	250.015	83.5733	250.051	73.852	249.865	56.277	249.933	42.5046	249.881	33.8209	241.205	42.6761	245.465	65.6088	250.074	68.4523	249.939	41.9954	249.809	43.3616	249.569
80.0443	249.917	48.6631	249.987	83.7447	250.022	73.853	249.865	56.4471	249.904	42.6721	249.852	34.1577	242.142	42.8428	246.241	65.7799	250.045	68.794	249.881	42.1671	249.78	43.8719	249.887
80.2164	249.889	48.6708	249.987	83.746	250.022	73.8541	249.865	56.2768	249.933	42.6693	249.852	33.9846	242.967	42.8394	247.046	65.7808	250.045	68.7953	249.881	42.3388	249.751	43.7034	249.714
80.048	249.917	49.0189	249.929	83.7472	250.022	74.0253	249.836	56.2766	249.933	42.4964	249.881	34.1518	243.737	43.0061	247.823	65.9519	250.016	69.1371	249.824	42.1701	249.78	43.874	249.887
80.2201	249.889	48.8563	249.958	83.9186	249.994	74.1965	249.808	56.4467	249.904	42.6638	249.852	34.6588	244.649	42.8324	248.66	65.9527	250.016	69.3079	249.999	42.1716	249.78	44.0453	249.858
80.3922	249.86	48.864	249.958	83.9198	249.994	74.0273	249.836	56.6161	250.079	42.6611	249.852	34.4857	245.479	--	--	65.9536	250.016	69.4794	249.97	42.0029	249.809	43.8761	249.887
80.5643	249.831	49.0419	249.929	83.9211	249.994	74.0283	249.836	56.616	250.079	42.8285	249.824	34.6529	246.251	42.829	249.468	65.9545	250.016	69.6509	249.942	42.1747	249.78	44.0474	249.858
80.3959	249.86	49.0496	249.929	83.9223	249.994	74.0293	249.836	56.4464	249.904	42.8258	249.824	34.6499	247.054	43.1666	250.018	65.9554	250.016	69.482	249.97	42.3464	249.751	44.0484	249.858
80.3978	249.86	49.0572	249.929	84.0937	249.965	74.2005	249.808	56.6158	250.079	42.6528	249.852	34.6463	248.059	43.1659	250.018	66.1265	249.988	69.8237	249.913	42.1777	249.78	44.2197	249.83
80.5699	249.831	49.2351	249.901	84.095	249.965	74.2015	249.808	56.6156	250.079	42.8203	249.824	34.9837	248.807	43.1658	249.816	66.2975	249.959	69.825	249.913	42.3494	249.751	44.2207	249.83
80.5711	250.036	49.413	249.872	84.0962	249.965	74.2025	249.808	56.7857	250.05	42.8175	249.824	34.9808	249.614	43.1651	249.816	66.1282	249.988	69.9965	249.884	42.5204	249.925	44.392	249.801
80.9134	249.978	49.4207	249.872	84.2676	249.936	74.2035	249.808	56.7856	250.05	42.8148	249.824	--	--	43.3339	249.989	66.2993	249.959	69.9978	249.884	42.3517	249.953	44.393	249.801
80.7457	249.803	49.4276	250.073	84.2689	249.936	74.374	249.983	56.9557	250.021	42.812	249.824	34.8096	249.844	43.5034	249.961	66.13	249.988	70.1693	249.856	42.5234	249.925	44.2239	249.83
80.9171	249.978	49.436	249.872	84.0999	249.965	74.2055	249.808	56.7854	250.05	42.9795	249.795	35.1491	249.988	43.3324	249.989	66.301	249.959	70.1707	249.856	42.6951	249.896	44.5654	249.772
80.919	249.978	49.4437	249.872	84.2713	249.936	74.5469	249.75	56.9554	250.021	42.9767	249.795	35.1489	249.988	43.5019	249.961	66.4721	249.93	70.5124	249.798	42.6973	249.694	44.7359	249.946
80.7514	249.803	49.6209	250.045	84.2725	249.936	74.3778	249.779	56.9553	250.021	42.8038	249.824	35.1486	249.988	43.5012	249.961	66.3028	249.959	70.3435	249.827	42.6982	249.896	44.5675	249.772
80.7525	250.007	49.6285	250.045	84.2738	249.936	74.3788	249.779	56.9552	250.021	42.9712	249.795	35.3186	249.96	43.6707	249.932	66.3037	249.959	70.3441	250.031	42.5295	249.925	44.738	249.946
80.9246	249.978	49.6362	250.045	84.275	249.936	74.2096	249.808	56.7849	250.05	42.9685	249.795	35.4886	249.931	43.6699	249.932	66.4748	249.93	70.5163	249.798	42.7012	249.896	44.91	249.715
81.0967	249.95	49.8141	250.016	84.4464	249.908	74.3808	249.779	56.7848	250.05	42.9657	249.795	35.4877	250.133	43.6692	249.932	66.6458	249.902	70.5169	250.002	42.5325	249.925	45.0805	249.888
81.2688	249.921	49.6515	250.045	84.4476	249.908	74.2116	249.808	56.9549	250.021	43.1332	249.766	35.4881	249.931	43.6685	249.932	66.3063	249.959	70.6884	249.973	42.8744	249.867	44.9114	249.917
81.1004	249.95	49.8294	250.016	84.4489	249.908	74.553	249.75	56.9547	250.021	43.1304	249.766	35.6574	250.104	43.838	249.903	66.4774	249.93	70.6897	249.973	42.8759	249.867	44.9124	249.917
81.2725	249.921	49.6669	250.045	84.6196	250.084	74.554	249.75	57.1248	249.992	42.9575	249.795	35.6579	249.902	43.667	249.932	66.6485	249.902	70.5208	250.002	42.7072	249.896	44.9142	249.715
81.2744	249.921	49.8448	250.016	84.6215	249.879	74.3848	249.779	56.9545	250.021	42.9547	249.795	35.8271	250.076	43.8365	249.903	66.8196	249.873	70.6923	249.973	42.5385	249.925	45.0847	249.888
81.4465	249.892	49.8524	250.016	84.4518	250.112	74.7255	249.926	57.1246	249.992	43.1221	249.766	35.6574	249.902	44.006	249.875	66.6502	249.902	70.8638	249.945	42.54	249.925	45.256	249.86
81.4483	249.892	50.0303	249.987	84.4538	249.908	74.7272	249.722	57.1245	249.992	42.9492	249.795	35.6571	249.902	43.8351	249.903	66.6511	249.902	71.0354	249.916	42.7117	249.896	45.0868	249.888
81.6204	249.864	50.038	249.987	84.4543	250.112	74.5573	249.954	57.1243	249.992	42.9464	249.795	35.8264	250.076	44.0045	249.875	66.8222	249.873	71.2069	249.887	42.8835	249.867	45.2581	249.86
81.6223	249.864	50.2159	249.959	84.7966	249.85	74.7285	249.926	57.1242	249.992	43.1139	249.766	35.8262	250.076	43.6634	249.932	66.9926	250.048	71.038	249.916	42.885	249.867	45.0889	249.888
81.4533	250.097	50.0533	249.987	84.627	250.084	74.56	249.75	57.2943	249.964	43.1111	249.766	35.8259	250.076	44.0031	249.875	66.8239	249.873	71.2095	249.887	42.8865	249.867	45.2602	249.86
81.626	249.864	50.061	249.987	84.7984	250.055	74.7313	249.722	57.2942	249.964	43.1084	249.766	35.8257	250.076	44.0024	249.875	66.8248	249.873	71.381	249.859	42.888	249.867	45.2613	249.86
81.6279	249.864	50.2389	249.959	84.7996	250.055	74.7316	249.926	57.2941	249.964	43.1056	249.766	35.8262	249.874	44.0016	249.875	66.825	250.077	71.2121	249.887	42.8895	249.867	45.4325	249.831
81.8	249.835	50.0763	249.987	84.8008	250.055	74.7326	249.926	57.1237	249.992	43.1029	249.766	35.9954	250.047	44.0009	249.875	66.8259	250.077	71.5538	249.83	43.0612	249.839	45.4336	249.831
81.8019	249.835	50.2542	249.959	84.8021	250.055	74.9038	249.897	57.2938	249.964	43.2696	249.94	35.825	250.076	43.83	249.903	66.997	250.048	71.5551	249.83	42.8925	249.867	45.2644	249.86
81.803	250.039	50.2619	249.959	84.804	249.85	74.9048	249.897	57.2937	249.964	43.2669	249.94	35.995	250.047	43.9995	249.875	66.9978	250.048	71.3862	249.859	43.0642	249.839	45.4357	249.831
81.9758	249.806	50.2696	249.959	84.8045	250.055	74.9058	249.897	57.2936	249.964	43.2648	249.738	35.9948	250.047	43.9987	249.875	67.1689	250.019	71.5577	249.83	43.2359	249.81	45.2665	249.86
81.9777	249.806	50.2772	249.959	84.8064	249.85	74.9068	249.897	57.2935	249.964	43.0919	249.766	35.9945	250.047	43.998	249.875	66.9996	250.048	71.7285	250.005	42.897	249.867	45.608	249.802
81.6392	249.864	50.2849	249.959	84.9772	250.026	74.7376	249.926	57.2933	249.964	43.2586	249.94	36.1645	250.018	43.9973	249.875	67.1707	250.019	71.7298	250.005	42.8985	249.867	45.609	249.802
81.9814	249.806	50.4628	249.93	84.8082	250.055	74.9088	249.897	57.4634	249.935	43.2559	249.94	36.1643	250.018	43.9965	249.875	67.0013	250.048	71.9014	249.976	43.0702	249.839	45.4399	249.831
82.1528	249.982	50.3002	249.959	84.9796	250.026	74.9098	249.897	57.2931	249.964	43.2531	249.94	36.164	250.018	43.9958	249.875	67.1724	250.019	71.9027	249.976	42.9015	249.867	45.6111	249.802
81.9845	250.011	50.4781	249.93	84.9809	250.026	75.081	249.868	57.4632	249.935	43.2511	249.738	36.1638	250.018	44.1646	250.048	67.0031	250.048	72.0742	249.948	43.0733	249.839	45.6122	249.802
82.1573	249.778	50.4858	249.93	84.8119	250.055	74.9118	249.897	57.4631	249.935	43.2476	249.94	36.1635	250.018	43.9944	249.875	67.1742	250.019	71.9053	249.976	43.0748	249.839	45.7835	249.774
81.9882	250.011	50.4935	249.93	84.9833	250.026	75.083	249.868	57.6332	249.906	43.2456	249.738	36.3335	249.99	44.1638	249.846	67.3453	249.991	71.9066	249.976	43.0763	249.839	45.6143	249.802
82.1603	249.982	50.5005	250.132	84.9845	250.026	74.9138	249.897	57.633	249.906	43.2421	249.94	36.3333	249.99	43.9929	249.875	67.3461	249.991	72.0781	249.948	43.248	249.81	45.6153	249.802
82.3324	249.953	50.5088	249.93	85.156	249.998	74.9149	249.897	57.462	250.138	43.2394	249.94	36.333	249.99	44.1624	249.846	67.347	249.991	72.0794	249.948	43.2495	249.81	45.9568	249.745
82.1641	249.982	50.5165	249.93	85.3274	249.969	74.9159	249.897	57.4626	249.935	43.2373	249.738	36.3328	249.99	44.3312	250.02	67.1777	250.019	72.2509	249.919	43.251	249.81	45.787	249.976
82.1659	249.982	50.6937	250.103	85.1584	249.998	74.9169	249.897	57.4625	249.935	43.2339	249.94	36.1624	250.018	43.9907	249.875	67.519	249.962	72.2522	249.919	43.2525	249.81	45.7887	249.774
81.9976	250.011	50.702	249.901	85.1597	249.998	74.9179	249.897	57.6326	249.906	43.2318	249.738	36.3323	249.99	44.3304	249.817	67.1794	250.019	72.0833	249.948	43.254	249.81	45.9593	249.947
82.3399	249.953	50.7097	249.901	85.1609	249.998	74.9189	249.897	57.4622	249.935	43.3986	249.912	36.3321	249.99	44.3297	249.817	67.5207	249.962	72.2548	249.919	43.2555	249.81	45.961	249.745
82.1716	249.982	50.7174	249.901	85.1621	249.998	75.0901	249.868	57.8025	249.878	43.3958	249.912	36.5021	249.961	44.1587	249.846	67.3514	249.991	72.4263	249.89	43.4272	249.781	45.7912	249.976
82.3436	249.953	50.7251	249.901	85.3335	249.969	74.9209	249.897	57.8024	249.878	43.3931	249.912	36.3316	249.99	44.3275	250.02	67.3523	249.991	72.2574	249.919	43.2585	249.81	45.9631	249.745
82.3455	249.953	50.7327	249.901	85.1646	249.998	75.0921	249.868	57.8016	250.081	43.3903	249.912	36.3314	249.99	44.1573	249.846	67.5234	249.962	72.2588	249.919	43.26	249.81	45.9635	249.947
82.3474	249.953	50.5702	249.93	85.1658	249.998	75.0931	249.868	57.9724	249.849	43.3876	249.912	36.5014	249.961	44.3261	250.02	67.5242	249.962	72.4303	249.89	43.4318	249.781	46.1347	249.918
82.5195	249.925	50.7481	249.901	85.3372	249.969	74.9239	249.897	57.6311	250.11	43.2146	249.94	36.3309	249.99	44.3261	249.817	67.3549	249.991	72.2614	249.919	43.4333	249.781	46.1365	249.716
82.3511	249.953	50.7557	249.901	85.3384	249.969	75.0951	249.868	57.9714	250.052	43.2118	249.94	36.3307	249.99	44.1544	250.048	67.3558	249.991	72.6031	249.862	43.605	249.753	46.1368	249.918
82.5232	249.925	50.9329	250.074	85.3397	249.969	75.0961	249.868	57.8011	250.081	43.3793	249.912	36.6709	249.932	44.3246	249.817	67.3567	249.991	72.4342	249.89	43.4363	249.781	46.3081	249.89
82.5251	249.925	50.7711	249.901	85.3409	249.969	75.2673	249.84	57.6315	249.906	43.3766	249.912	36.5004	249.961	44.4934	249.991	67.5277	249.962	72.4355	249.89	43.608	249.753	46.139	249.918
82.527	249.925	50.9483	250.074	85.5123	249.94	75.0981	249.868	57.9711	250.052	43.3738	249.912	36.5002	249.961	44.4933	249.789	67.5286	249.962	72.7772	249.833	43.6095	249.753	46.14	249.918
82.3586	249.953	51.1262	250.045	85.5136	249.94	75.0991	249.868	57.8007	250.081	43.371	249.912	36.6701	249.932	44.4919	249.991	67.6997	249.933	72.6083	249.862	43.6103	249.955	46.3113	249.89
82.3605	249.953	50.9636	250.074	85.3446	249.969	75.1002	249.868	57.6311	249.906	43.3683	249.912	36.4997	249.961	44.3217	249.817	67.7006	249.933	72.7798	249.833	43.4423	249.781	46.4825	249.861
82.5326	249.925	50.972	249.873	85.3458	249.969	74.931	249.897	57.8012	249.878	43.3655	249.912	36.6697	249.932	44.4905	249.991	67.7015	249.933	72.6109	249.862	43.4438	249.781	46.3134	249.89
82.7047	249.896	51.1492	250.045	85.6874	249.912	75.1022	249.868	58.1408	250.024	43.3628	249.912	36.6694	249.932	44.4898	249.991	67.7023	249.933	72.9526	249.804	43.6155	249.753	46.6548	249.832
82.5363	249.925	51.1568	250.045	85.3483	249.969	75.1032	249.868	57.8003	250.081	43.5303	249.883	36.499	249.961	44.489	249.991	67.7032	249.933	72.783	250.037	43.7866	249.926	46.4857	249.861
82.368	249.953	51.1645	250.045	85.5197	249.94	75.1042	249.868	57.9703	250.052	43.3573	249.912	36.669	249.932	44.4883	249.991	67.7041	249.933	72.9552	249.804	43.4483	249.781	46.4867	249.861
82.5401	249.925	51.3424	250.017	85.5209	249.94	75.2754	249.84	57.8	250.081	43.5247	249.883	36.6687	249.932	44.6578	249.962	67.5348	249.962	72.9558	250.008	43.4498	249.781	46.4878	249.861
82.5419	249.925	51.3501	250.017	85.5221	249.94	75.2764	249.84	57.9701	250.052	43.6922	249.854	36.6685	249.932	44.4868	249.991	67.7058	249.933	72.7876	249.833	43.6209	249.955	46.4888	249.861
82.714	249.896	51.1875	250.045	85.5234	249.94	75.2774	249.84	58.1402	250.024	43.5192	249.883	36.8385	249.903	44.4861	249.991	67.7067	249.933	72.9585	250.008	43.4529	249.781	46.4899	249.861
82.7159	249.896	51.025	250.074	85.5246	249.94	--	--	58.1408	249.82	43.3463	249.912	36.8382	249.903	44.4861	249.789	67.8778	249.905	73.13	249.98	43.6239	249.955	46.4909	249.861
82.7178	249.896	51.3731	250.017	85.3556	249.969	75.1082	249.868	58.1399	250.024	43.6839	249.854	36.838	249.903	44.6549	249.962	67.7085	249.933	72.9611	250.008	43.6254	249.955	46.6622	249.832
82.5494	249.925	51.3807	250.017	85.5271	249.94	75.624	248.56	58.1398	250.024	43.6812	249.854	36.6676	249.932	44.4839	249.991	67.8795	249.905	73.1333	249.776	43.6276	249.753	46.6632	249.832
82.5513	249.925	51.3884	250.017	85.5283	249.94	75.2853	248.413	58.1397	250.024	43.6784	249.854	36.8375	249.903	44.4832	249.991	67.7102	249.933	73.1339	249.98	43.7993	249.724	46.6643	249.832
82.7234	249.896	51.3961	250.017	85.3593	249.969	75.1188	247.629	58.1396	250.024	43.5055	249.883	36.8366	250.105	44.4825	249.991	67.8813	249.905	73.1352	249.98	43.6299	249.955	46.8355	249.804
82.7253	249.896	51.574	249.988	85.5307	249.94	75.4623	246.962	58.1395	250.024	43.6729	249.854	36.8371	249.903	44.652	249.962	68.0524	249.876	73.1365	249.98	43.6314	249.955	46.8366	249.804
82.7271	249.896	51.5816	249.988	85.532	249.94	75.1264	246.005	58.1394	250.024	43.6702	249.854	36.8368	249.903	44.6512	249.962	68.0533	249.876	73.308	249.951	43.8038	249.724	46.8376	249.804
82.8992	249.867	51.4191	250.017	85.5332	249.94	74.9599	245.224	58.3094	249.995	43.6674	249.854	36.8359	250.105	44.8207	249.934	67.8839	249.905	73.3093	249.951	43.8047	249.926	46.8387	249.804
82.9011	249.867	51.4268	250.017	85.5344	249.94	75.1339	244.386	58.1391	250.024	43.6647	249.854	36.8364	249.903	44.6498	249.962	67.7146	249.933	73.3106	249.951	43.8062	249.926	46.8398	249.804
82.7328	249.896	51.6047	249.988	85.5356	249.94	75.1376	243.579	58.3092	249.995	43.6619	249.854	36.8361	249.903	44.6491	249.962	67.885	250.108	73.3119	249.951	43.6382	249.753	46.8408	249.804
82.9048	249.867	51.4421	250.017	85.7071	249.912	75.3116	242.743	57.9687	250.052	43.489	249.883	37.0061	249.875	44.8185	249.934	68.0568	249.876	73.3132	249.951	43.8092	249.926	46.8419	249.804
82.9067	249.867	51.4498	250.017	85.7083	249.912	74.9756	241.794	57.9685	250.052	43.4862	249.883	36.8356	249.903	44.6476	249.962	67.8868	250.108	73.4848	249.922	43.9809	249.897	47.0131	249.775
82.9086	249.867	51.4575	250.017	85.7095	249.912	74.9794	240.99	58.3088	249.995	43.6537	249.854	36.8354	249.903	44.8171	249.934	68.0585	249.876	73.4861	249.922	43.8122	249.926	46.844	249.804
82.9105	249.867	51.6353	249.988	85.7108	249.912	74.9831	240.187	58.1385	250.024	43.8211	249.826	36.8345	250.105	44.6461	249.962	68.0587	250.079	73.6576	249.894	43.8144	249.724	47.0152	249.775
83.0825	249.839	51.4728	250.017	85.712	249.912	74.8166	239.414	58.3086	249.995	43.6482	249.854	36.8349	249.903	44.8156	249.934	67.8901	249.905	73.6589	249.894	43.9854	249.897	46.6759	249.832
83.2546	249.81	51.6507	249.988	85.7132	249.912	74.8204	238.614	58.1383	250.024	43.8156	249.826	36.8347	249.903	44.6447	249.962	68.0612	249.876	73.6602	249.894	43.9869	249.897	47.0173	249.775
82.9161	249.867	51.8286	249.959	85.7144	249.912	74.6539	237.843	58.3083	249.995	43.6427	249.854	37.1742	250.048	44.8142	249.934	68.2315	250.051	73.4913	249.922	43.9884	249.897	47.0184	249.775
83.2584	249.81	51.666	249.988	85.7156	249.912	74.8285	236.816	58.4784	249.966	43.6399	249.854	37.1739	250.048	44.9836	249.905	68.0622	250.079	73.6628	249.894	43.8197	249.926	46.8492	249.804
83.09	249.839	51.8439	249.959	85.5467	249.94	74.8322	236.02	58.4783	249.966	43.6371	249.854	37.1744	249.846	44.8127	249.934	68.0631	250.079	73.8343	249.865	43.9914	249.897	47.1907	249.746
83.2621	249.81	51.8516	249.959	85.8883	249.883	74.6657	235.253	58.4782	249.966	43.6351	249.652	37.0033	250.077	44.812	249.934	68.2342	250.051	73.8356	249.865	43.993	249.897	47.0215	249.775
83.264	249.81	51.8593	249.959	86.059	250.059	74.8396	234.429	58.3079	249.995	43.6316	249.854	37.1733	250.048	44.8113	249.934	68.0655	249.876	73.8369	249.865	44.1647	249.868	47.1928	249.746
83.095	250.043	51.8669	249.959	85.7206	249.912	74.6731	233.664	58.3077	249.995	43.6289	249.854	37.0035	249.875	44.9807	249.905	68.2359	250.051	73.668	249.894	43.996	249.897	47.1932	249.949
83.4373	249.986	52.0448	249.931	85.8913	250.088	74.5073	232.703	58.648	249.938	43.9665	249.797	37.1728	250.048	44.98	249.905	68.2368	250.051	73.8395	249.865	43.8273	249.926	47.1949	249.746
83.4398	249.781	51.8823	249.959	85.723	249.912	74.511	231.912	58.4777	249.966	43.7936	249.826	37.1725	250.048	44.8091	249.934	68.4079	250.022	73.8408	249.865	43.999	249.897	47.1953	249.949
83.441	249.986	52.0601	249.931	85.8937	250.088	74.5153	230.925	58.1372	250.024	43.6206	249.854	37.1723	250.048	44.8084	249.934	68.0683	250.079	73.8421	249.865	44.0005	249.897	47.197	249.746
83.4436	249.781	51.8976	249.959	85.7255	249.912	74.3481	230.362	58.4775	249.966	43.6179	249.854	37.1721	250.048	44.8076	249.934	68.0692	250.079	74.0136	249.836	43.8318	249.926	47.1974	249.949
83.2752	249.81	52.2457	249.902	85.8969	249.883	74.1823	229.407	58.4774	249.966	43.6151	249.854	37.0016	250.077	44.8069	249.934	68.2403	250.051	73.844	250.069	44.1737	249.868	47.3686	249.92
83.4466	249.986	51.913	249.959	85.8981	249.883	74.5264	228.563	58.307	249.995	43.7826	249.826	37.1716	250.048	44.9764	249.905	68.071	250.079	74.0162	249.836	44.3454	249.84	47.1995	249.949
83.279	249.81	51.9206	249.959	85.8987	250.088	74.1896	227.836	58.3069	249.995	43.6096	249.854	37.1714	250.048	44.8055	249.934	68.0726	249.876	74.0176	249.836	44.0065	249.897	47.2012	249.746
83.2809	249.81	51.9283	249.959	85.9006	249.883	74.3642	226.828	58.477	249.966	43.6069	249.854	37.1711	250.048	44.8047	249.934	68.4132	250.022	74.1884	250.012	44.1782	249.868	47.2016	249.949
83.4522	249.986	51.936	249.959	85.9018	249.883	74.3679	226.045	58.3067	249.995	43.6041	249.854	37.1709	250.048	44.9742	249.905	68.2438	250.051	74.0202	249.836	44.3499	249.84	47.0331	249.775
83.4541	249.986	52.1138	249.931	85.9023	250.088	74.3715	225.264	58.3065	249.995	43.7716	249.826	37.0005	250.077	44.6331	249.962	68.4149	250.022	74.0215	249.836	44.1812	249.868	47.2044	249.746
83.456	249.986	52.1215	249.931	85.9036	250.088	74.205	224.513	58.6468	249.938	43.7688	249.826	37.1704	250.048	44.8025	249.934	68.2463	249.847	74.1923	250.012	44.1828	249.868	47.3749	249.92
83.4579	249.986	52.2994	249.902	85.9055	249.883	74.2093	223.539	58.4765	249.966	43.7661	249.826	37.1702	250.048	44.972	249.905	68.0763	250.079	74.0234	250.04	44.3545	249.84	47.2058	249.949
83.4597	249.986	52.1369	249.931	86.2464	250.031	74.2129	222.762	58.6466	249.938	43.7633	249.826	37.17	250.048	44.9713	249.905	68.4175	250.022	74.1956	249.808	44.356	249.84	47.377	249.92
83.6318	249.957	51.9743	249.959	86.0774	250.059	74.3874	221.763	58.3061	249.995	--	--	37.1704	249.846	44.9706	249.905	68.4184	250.022	74.1962	250.012	44.3575	249.84	47.3788	249.718
83.4635	249.986	52.1522	249.931	85.9085	250.088	74.0507	221.045	58.4761	249.966	43.5904	249.854	37.3397	250.019	44.9698	249.905	--	--	74.1982	249.808	--	--	47.3791	249.92
83.6356	249.957	52.3301	249.902	85.9097	250.088	73.8841	220.3	58.476	249.966	43.4208	248.87	37.1692	250.048	44.7989	249.934	68.4193	250.022	74.369	249.983	44.359	249.84	47.5504	249.891
--	--	52.3377	249.902	86.0818	249.854	74.0579	219.499	58.6461	249.938	43.5897	248.437	37.169	250.048	44.7982	249.934	68.764	248.947	74.2001	250.012	44.3639	248.83	47.5514	249.891
83.6374	249.957	52.1752	249.931	86.0824	250.059	73.5516	218.621	58.4758	249.966	43.7592	247.802	37.1688	250.048	44.7974	249.934	68.2557	248.627	74.3716	249.983	44.1966	248.456	47.3823	249.92
83.6435	248.732	52.3531	249.902	86.0836	250.059	73.8963	217.601	58.6459	249.938	43.7599	246.792	37.1685	250.048	44.9669	249.905	68.4295	247.786	74.3729	249.983	44.3711	247.621	47.3833	249.92
83.646	248.528	52.3608	249.902	85.7444	250.117	73.7297	216.861	58.6457	249.938	43.7599	245.986	37.1683	250.048	44.9662	249.905	68.4331	246.975	74.2047	249.808	44.2051	246.846	47.3844	249.92
83.6507	247.712	52.3684	249.902	85.9165	249.883	73.7333	216.094	58.6456	249.938	43.7598	245.181	37.3383	250.019	44.9655	249.905	68.2666	246.194	74.206	249.808	44.2093	246.042	47.5556	249.891
83.6553	246.898	52.3761	249.902	--	--	73.5667	215.356	58.6455	249.938	43.7598	244.377	37.5082	249.991	44.9648	249.905	68.4404	245.356	74.3769	249.983	44.2136	245.24	47.5567	249.891
83.4898	246.114	52.3838	249.902	85.9177	249.883	73.7412	214.371	58.6454	249.938	43.7598	243.574	37.508	249.991	44.7938	249.934	68.2738	244.577	74.3782	249.983	44.0476	244.468	47.728	249.863
83.4944	245.302	--	--	85.7515	249.094	73.5746	213.636	58.6453	249.938	43.7605	242.572	37.3376	250.019	44.7931	249.934	68.2775	243.771	74.5497	249.954	44.2227	243.439	47.5588	249.891
83.499	244.491	52.3914	249.902	86.0946	248.628	73.5788	212.683	58.6452	249.938	43.7597	241.972	37.3373	250.019	44.9626	249.905	68.1109	242.994	74.3808	249.983	44.2263	242.84	47.5598	249.891
83.5036	243.682	52.2317	249.125	85.9284	247.84	73.4122	211.95	58.8145	250.112	43.5902	241.002	37.3371	250.019	44.9618	249.905	68.1151	241.989	74.2126	249.808	44.2311	241.843	47.7311	249.863
83.509	242.671	52.4109	248.693	85.7622	247.053	73.4165	211	58.6449	249.938	43.4199	240.233	37.3368	250.019	44.9611	249.905	67.9485	241.215	--	--	44.0652	241.075	47.7322	249.863
83.3434	241.893	52.4213	247.889	85.9364	246.21	73.2498	210.27	--	--	43.5901	239.407	37.3366	250.019	45.1306	249.876	68.1224	240.385	74.3834	249.983	44.2396	240.252	47.563	249.891
83.5182	241.059	52.4317	247.086	85.9403	245.397	73.2541	209.324	58.4746	249.966	43.4198	238.64	37.5066	249.991	44.9597	249.905	67.9557	239.613	74.7279	249.11	44.0736	239.486	47.7343	249.863
83.5228	240.254	52.2726	246.112	86.1145	244.556	73.2576	208.567	58.6481	248.922	43.5907	237.619	37.3362	250.019	44.9589	249.905	67.96	238.614	74.561	248.528	44.2487	238.467	47.7353	249.863
83.3572	239.479	52.4532	245.282	85.949	243.572	73.2619	207.624	58.6487	248.719	43.4204	236.854	37.3359	250.019	44.9582	249.905	67.7934	237.845	74.3949	247.743	44.0827	237.704	47.7364	249.863
83.532	238.648	52.2934	244.511	85.953	242.762	73.0952	206.899	58.4811	247.937	43.4203	236.062	37.5059	249.991	45.1277	249.876	67.7977	236.849	74.399	246.931	44.0868	236.914	47.7374	249.863
83.5366	237.846	52.3038	243.713	85.7868	241.983	73.0988	206.147	58.6546	246.896	43.4203	235.271	37.5057	249.991	44.9568	249.905	67.9708	236.224	74.5733	246.091	44.0917	235.927	47.7385	249.863
83.5419	236.846	52.3141	242.916	85.7907	241.176	73.103	205.208	58.6573	246.088	43.4209	234.285	37.5054	249.991	45.1262	249.876	67.8042	235.458	74.4071	245.31	44.0959	235.14	--	--
83.5465	236.048	52.3252	241.921	85.7947	240.37	73.1065	204.458	58.4897	245.309	43.4208	233.496	37.6754	249.962	44.9553	249.905	67.8084	234.466	74.2409	244.53	43.9299	234.382	47.7395	249.863
83.3808	235.279	52.3356	241.126	85.7987	239.565	72.9405	203.551	58.3221	244.532	43.5909	232.68	37.5049	249.991	44.9546	249.905	67.6418	233.703	74.2457	243.52	43.934	233.596	47.5731	249.083
83.5556	234.454	52.3459	240.332	85.9728	238.733	73.1143	202.775	58.3247	243.727	43.2505	231.952	37.6749	249.962	44.9539	249.905	67.6453	232.913	74.2497	242.714	44.1084	232.783	47.7464	248.448
83.39	233.687	52.3563	239.54	85.8066	237.959	72.9483	201.871	58.6684	242.665	43.251	230.971	37.6747	249.962	45.1233	249.876	67.6496	231.926	74.424	241.88	43.9431	231.833	47.7502	247.642
83.5655	232.666	52.3673	238.551	85.8112	236.957	72.7822	200.969	58.5001	242.092	43.0807	230.216	37.5042	249.991	45.1226	249.876	67.6531	231.137	74.428	241.076	43.9472	231.051	47.754	246.836
83.3998	231.902	52.2068	237.987	85.8152	236.157	72.6155	200.255	58.5034	241.09	43.2509	229.405	37.8444	249.933	--	--	67.6567	230.35	74.2619	240.302	43.7812	230.3	47.5876	246.061
83.5746	231.081	52.0476	237.03	85.6489	235.387	72.4495	199.356	58.5054	240.49	42.911	228.487	37.674	249.962	45.1219	249.876	67.6602	229.564	74.4361	239.472	43.9562	229.297	47.5914	245.257
83.409	230.32	52.2282	236.213	85.6528	234.589	72.4536	198.431	58.5086	239.491	43.2513	227.649	37.6737	249.962	44.7849	248.719	67.4942	228.612	74.1004	238.529	43.9604	228.519	47.5952	244.455
83.2433	229.559	52.2385	235.427	85.6574	233.594	72.6274	197.662	58.341	238.722	43.4214	226.842	37.6735	249.962	45.2954	248.431	67.4978	227.829	74.2746	237.701	43.9645	227.742	47.4294	243.483
83.4187	228.545	52.0793	234.474	85.4912	232.828	72.6309	196.924	58.3436	237.925	43.4213	226.065	37.8435	249.933	45.2968	247.825	67.5013	227.047	74.1084	236.931	43.7985	226.995	47.4332	242.684
83.2531	227.787	52.0897	233.69	85.6653	232.005	72.4648	196.032	58.3469	236.931	43.0814	225.152	37.5028	249.991	44.9591	246.874	67.3353	226.099	74.2827	236.106	43.633	226.055	47.437	241.885
83.4278	226.973	52.1	232.907	85.4997	231.043	72.2987	195.142	58.3494	236.137	43.0813	224.377	--	--	45.1306	246.241	67.3388	225.32	74.1171	235.14	43.8074	225.253	47.4407	241.088
83.4324	226.188	52.1103	232.126	85.5029	230.449	72.132	194.436	58.1818	235.373	43.0812	223.604	37.506	248.981	45.1333	245.236	67.5126	224.512	74.2913	234.317	43.642	224.317	47.4445	240.292
83.2674	225.238	52.1213	231.15	85.3373	229.49	72.1362	193.52	58.1844	234.581	43.0817	222.638	37.6774	248.549	44.9651	244.461	67.3459	223.764	74.2947	233.722	43.8163	223.518	47.1085	239.356
83.4421	224.427	51.9614	230.4	85.3412	228.701	72.1397	192.789	58.1876	233.593	43.2518	221.838	37.509	247.974	44.7969	243.688	67.1798	222.822	74.2993	232.732	43.6502	222.777	47.2824	238.534
83.1069	223.509	52.1426	229.399	85.3451	227.913	71.9736	191.905	58.1902	232.804	43.0815	221.097	37.5121	246.968	44.9691	242.858	67.1833	222.047	74.1331	231.97	43.655	221.817	47.2862	237.741
83.1114	222.73	51.8125	228.68	85.1795	226.958	71.9777	190.993	58.3629	231.987	43.0813	220.328	37.5147	246.165	44.8009	242.087	67.1875	221.081	73.9669	231.209	43.4889	221.078	47.1197	236.979
83.2861	221.923	51.993	227.876	85.3536	226.144	71.8109	190.295	58.0251	231.257	43.252	219.34	37.5171	245.362	44.8035	241.089	67.0201	220.53	73.9716	230.223	43.6632	220.284	47.1241	235.992
83.1204	221.174	51.8331	227.13	85.1873	225.388	71.6448	189.416	58.0277	230.471	43.0817	218.602	37.6898	244.533	44.8055	240.291	67.0243	219.566	73.9755	229.436	43.668	219.328	46.9577	235.232
83.1256	220.204	52.0143	226.135	85.3614	224.576	71.8191	188.481	57.8607	229.519	43.0822	217.646	37.5221	243.761	44.8075	239.495	67.3682	218.738	73.9795	228.65	43.6721	218.565	46.962	234.247
83.1301	219.43	52.0246	225.364	85.3659	223.599	71.8226	187.757	58.2036	228.679	42.9118	216.911	37.5253	242.763	44.6399	238.53	66.8617	217.864	73.8133	227.894	43.506	217.832	46.9658	233.461
82.9644	218.685	51.8653	224.429	85.3698	222.818	71.8267	186.854	58.0366	227.73	43.0819	216.119	37.5277	241.966	44.8115	237.906	66.8652	217.096	73.9881	226.885	43.6809	216.852	46.9695	232.676
83.1391	217.884	51.8756	223.66	85.0333	222.096	71.4903	186.011	58.0385	227.144	42.742	215.225	37.5302	241.169	44.6439	236.944	67.0396	216.11	73.9921	226.103	43.5148	216.121	46.803	231.921
83.1443	216.921	51.8859	222.892	85.208	221.095	71.4938	185.291	58.0417	226.17	43.0822	214.408	37.3625	240.403	44.816	236.124	66.8728	215.374	73.8259	225.35	43.1791	215.231	46.9769	231.11
82.9785	216.18	51.7266	221.963	85.2119	220.318	71.4978	184.393	57.874	225.42	42.9125	213.488	37.1954	239.439	44.6478	235.363	66.8769	214.419	73.8305	224.376	43.5236	214.416	46.8111	230.162
83.1539	215.19	51.9071	221.169	85.0455	219.571	71.3317	183.526	57.8772	224.448	42.9123	212.731	37.1979	238.647	44.4802	234.406	66.8804	213.657	73.8344	223.597	43.3581	213.5	46.8148	229.382
82.9882	214.452	51.7472	220.433	85.05	218.603	71.3351	182.81	57.8797	223.673	43.0823	211.945	37.2003	237.856	44.6524	233.589	66.8839	212.896	73.6682	222.848	43.7026	212.688	46.8185	228.603
82.9926	213.686	51.7581	219.479	85.0539	217.83	71.3392	181.917	58.0524	222.869	42.9126	211.03	37.2028	237.065	44.4841	232.832	66.7178	211.975	73.5026	221.907	43.1961	212.021	46.8222	227.825
82.9978	212.73	51.7683	218.718	85.0577	217.058	71.173	181.055	58.0549	222.095	42.913	210.088	37.0357	236.108	44.4861	232.046	66.7212	211.216	73.5065	221.132	43.5412	211.024	46.8265	226.854
83.0022	211.967	51.6084	217.986	85.0623	216.094	71.177	180.166	58.0581	221.13	42.7426	209.365	37.2083	235.291	44.8291	231.009	66.5551	210.299	73.6813	220.136	43.375	210.302	46.8302	226.079
83.0067	211.205	51.7895	217.008	85.0661	215.325	71.0102	179.484	57.8904	220.388	42.743	208.426	37.2108	234.505	44.831	230.226	66.5586	209.543	73.515	219.392	43.2095	209.394	46.6644	225.14
83.0118	210.253	51.6295	216.279	84.8997	214.585	71.0143	178.598	57.8929	219.618	42.7428	207.676	37.043	233.748	44.4925	229.502	66.5627	208.599	73.6892	218.592	43.3844	208.43	46.668	224.368
82.8461	209.522	51.6404	215.333	85.0744	213.598	71.0183	177.714	57.7258	218.686	42.7426	206.927	37.0461	232.768	44.6653	228.498	66.3959	207.875	73.5229	217.851	43.3884	207.683	46.6717	223.596
82.6809	208.603	51.4805	214.606	85.0782	212.832	70.8521	176.86	57.5581	217.947	42.9133	205.964	36.8783	232.014	44.6673	227.719	66.4	206.934	73.3572	216.919	43.3925	206.938	46.5058	222.662
82.6854	207.846	51.4913	213.664	84.7417	212.125	70.8555	176.155	57.7314	216.961	42.7428	205.247	36.8807	231.232	44.499	226.97	66.4034	206.183	73.191	216.18	43.227	206.036	46.5095	221.893
82.6905	206.901	51.5016	212.911	84.7461	211.171	70.8595	175.276	57.9041	216.167	42.7433	204.316	37.054	230.228	44.6711	226.164	66.4068	205.434	73.1955	215.222	43.4012	205.264	46.5132	221.125
82.8651	206.118	51.6826	211.942	85.0904	210.351	70.6932	174.427	57.7364	215.433	42.743	203.572	37.0564	229.449	44.5028	225.417	66.4109	204.498	73.5399	214.4	43.2356	204.366	46.3473	220.196
82.7	205.205	51.3524	211.25	84.7544	209.458	70.6972	173.551	57.5693	214.509	42.5732	202.674	36.8886	228.699	44.5053	224.449	66.2447	203.593	73.3735	213.665	43.0701	203.469	46.3509	219.43
82.7044	204.453	51.5335	210.284	84.7582	208.698	70.7012	172.677	57.5718	213.747	42.573	201.933	36.891	227.923	44.6775	223.647	66.0779	202.876	73.3774	212.902	43.2443	202.701	46.185	218.504
82.7088	203.702	51.3735	209.566	84.7627	207.751	70.535	171.834	57.5749	212.798	42.5734	201.008	37.0643	226.924	44.1694	222.769	66.2515	202.103	73.2118	211.979	43.0781	201.992	46.3589	217.713
82.7139	202.765	51.3844	208.632	84.5963	207.022	70.3687	170.993	57.5773	212.039	42.5738	200.085	36.8965	226.179	44.5117	221.941	65.9152	201.231	73.0461	211.058	43.0828	201.072	46.193	216.79
82.7183	202.017	51.3946	207.887	84.6007	206.078	70.3727	170.124	57.75	211.253	42.4033	199.377	36.8989	225.406	44.3434	221.2	66.0888	200.46	73.2202	210.27	43.0874	200.153	46.1966	216.03
82.7234	201.083	51.4048	207.143	84.4336	205.541	70.3761	169.43	57.7531	210.308	42.4037	198.457	36.7317	224.47	44.5161	220.212	66.0928	199.534	73.2241	209.513	43.2616	199.39	46.03	215.299
82.5576	200.366	51.4156	206.215	84.6083	204.57	70.38	168.565	57.4151	209.611	42.4034	197.723	36.7341	223.699	44.3478	219.474	65.9266	198.639	73.0584	208.596	42.9258	198.532	45.8641	214.381
82.7328	199.407	51.2562	205.317	84.2723	203.688	70.3839	167.701	57.4182	208.669	42.4038	196.807	36.5663	222.958	44.3503	218.517	65.7598	197.93	72.8927	207.682	43.2702	197.743	46.0379	213.596
82.3974	198.536	51.2664	204.577	84.4463	202.909	70.0475	166.897	57.2504	207.946	42.4035	196.075	36.7395	221.969	44.182	217.781	65.934	196.98	73.0668	206.899	42.9344	196.888	45.872	212.681
82.7422	197.736	51.2772	203.653	84.2805	202.001	70.0514	166.037	57.4237	206.978	42.2337	195.19	36.7419	221.202	44.3541	216.989	65.9374	196.245	73.2408	206.118	42.939	195.977	45.8756	211.927
82.5764	197.024	51.2874	202.916	84.4544	201.224	70.0553	165.178	57.4261	206.228	42.2334	194.461	36.4045	220.303	44.1857	216.256	65.7712	195.356	72.9049	205.237	42.7728	195.278	46.05	210.957
82.5815	196.1	51.4684	201.967	84.2886	200.319	70.0592	164.322	57.259	205.322	42.2338	193.551	36.4069	219.539	44.1889	215.115	65.7751	194.44	72.9088	204.487	42.9476	194.342	45.7132	210.263
82.5865	195.178	51.3084	201.261	84.6328	199.516	69.8924	163.667	57.2614	204.575	42.4037	192.795	36.4092	218.775	44.0205	214.385	65.7785	193.708	72.9133	203.551	42.9522	193.436	45.7175	209.326
82.5908	194.441	51.1489	200.372	84.467	198.614	69.8963	162.813	57.0943	203.671	42.0636	191.946	36.4122	217.823	44.1926	213.598	65.7819	192.978	73.0873	202.775	42.786	192.742	45.7211	208.577
82.5958	193.522	51.3299	199.428	84.1303	197.929	69.73	161.991	57.2669	202.898	42.0639	191.041	36.2444	217.091	44.0242	212.87	65.6156	192.095	72.921	202.058	42.6203	191.868	45.5551	207.672
82.43	192.817	51.3401	198.697	84.3049	196.973	69.7344	160.971	57.2699	201.969	42.2345	190.109	36.2474	216.142	44.0267	211.926	65.6196	191.186	72.7552	201.155	42.7951	190.938	45.5587	206.925
82.6052	191.872	51.1807	197.814	84.3087	196.233	69.7378	160.293	57.1027	201.07	42.2341	189.388	36.4199	215.355	44.1987	211.143	65.6236	190.278	72.5895	200.255	42.6288	190.248	45.5629	205.994
82.4394	191.169	51.361	197.057	84.313	195.309	69.5714	159.476	57.1045	200.515	42.2345	188.488	36.2527	214.438	44.2006	210.39	65.4573	189.401	72.7635	199.484	42.4632	189.379	45.5665	205.25
82.4443	190.257	51.2016	196.177	84.1466	194.6	69.5759	158.462	57.2777	199.561	42.2341	187.769	36.255	213.682	44.0328	209.479	65.2905	188.706	72.5978	198.587	42.638	188.454	45.4005	204.351
82.4493	189.346	51.0421	195.298	84.3211	193.65	69.5792	157.788	56.9403	198.697	42.2345	186.872	36.2574	212.928	44.2055	208.512	65.2944	187.803	72.7724	197.634	42.6419	187.739	45.404	203.61
82.453	188.8	51.0523	194.574	84.1547	192.944	69.5831	156.947	57.1129	197.931	42.0645	186.006	36.4305	211.958	43.8669	207.821	65.4679	187.053	72.606	196.924	42.6465	186.846	45.4076	202.87
82.1182	187.768	51.063	193.67	84.3292	191.998	69.4167	156.137	56.9457	197.04	42.0648	185.113	36.2626	211.235	43.6992	206.915	65.1315	186.212	72.6098	196.187	42.6504	186.133	45.2422	201.791
82.2927	187.014	50.9035	192.797	83.9931	191.14	69.2509	155.162	56.9487	196.123	42.0645	184.399	36.0954	210.326	43.8712	206.139	65.1354	185.314	72.6143	195.267	42.4847	185.273	45.2458	201.054
82.2977	186.11	50.9143	191.897	84.167	190.38	69.2548	154.326	57.1213	195.361	42.0648	183.509	36.0977	209.576	43.8736	205.208	65.1387	184.597	72.4485	194.378	42.4892	184.385	45.2499	200.135
82.1324	185.236	50.9244	191.178	84.0012	189.496	69.2586	153.493	56.9541	194.475	41.8942	182.827	36.1006	208.641	44.0456	204.435	65.3128	183.673	72.4523	193.645	42.3235	183.528	45.0833	199.429
82.307	184.486	50.9345	190.46	83.8353	188.614	69.0922	152.69	56.9565	193.745	41.8945	181.941	36.1029	207.895	43.8779	203.535	65.1465	182.809	72.4567	192.731	42.6679	182.762	45.2577	198.483
82.1417	183.615	50.775	189.593	83.839	187.887	69.0961	151.86	56.7892	192.863	41.7245	181.084	36.1059	206.963	43.8796	202.794	64.9796	182.125	72.2903	192.029	42.5022	181.909	45.2612	197.751
81.9764	182.747	50.9559	188.67	83.8433	186.979	69.0999	151.032	56.7916	192.135	41.895	180.172	35.938	206.248	43.8821	201.869	64.9835	181.236	72.1245	191.147	42.5067	181.028	45.0952	196.867
82.1509	182.001	50.7964	187.807	83.847	186.255	68.9335	150.235	56.9648	191.198	41.8952	179.291	36.1111	205.29	43.7136	201.159	64.9874	180.348	72.2991	190.208	42.5112	180.149	44.9291	195.984
82.1558	181.106	50.8065	187.094	83.8513	185.35	68.7671	149.44	56.9677	190.292	41.8949	178.587	36.1134	204.549	43.8863	200.208	64.8211	179.491	72.1326	189.51	42.3454	179.3	45.1028	195.227
81.9905	180.242	50.9874	186.176	83.8556	184.448	68.7709	148.617	56.7998	189.597	42.0653	177.679	35.9461	203.652	43.888	199.471	64.9946	178.754	71.9668	188.633	42.3493	178.6	45.2766	194.472
81.9954	179.351	50.9981	185.289	83.8593	183.727	68.4348	147.69	56.6326	188.723	41.7245	177.036	35.7788	202.758	43.55	198.61	64.6581	177.929	72.1414	187.699	42.3538	177.725	44.6005	193.499
82.1699	178.611	50.6684	184.462	83.6933	182.857	68.6088	146.842	56.6355	187.821	41.8956	175.957	35.9513	201.991	43.722	197.848	64.6619	177.048	71.975	187.006	42.3583	176.853	44.7748	192.566
82.1742	177.9	50.6784	183.755	83.8672	182.11	68.6126	146.025	56.6379	187.102	41.8952	175.258	35.7833	201.284	43.5542	196.961	64.6658	176.169	71.9793	186.104	42.1925	176.011	44.7783	191.843
81.8393	176.895	50.8593	182.843	83.7013	181.242	68.6164	145.21	56.6408	186.203	41.7252	174.416	35.7862	200.365	43.5566	196.047	64.4994	175.32	71.9837	185.204	42.1964	175.316	44.7818	191.121
82.0138	176.158	50.6998	181.992	83.7055	180.348	68.45	144.425	56.4735	185.336	41.8956	173.517	35.7891	199.448	43.7285	195.289	64.5027	174.62	71.9874	184.486	42.0307	174.478	44.6157	190.25
82.0186	175.275	50.5402	181.142	83.5396	179.485	68.4537	143.614	56.646	184.591	41.7256	172.678	35.7913	198.715	43.3905	194.436	64.3363	173.774	72.162	183.56	42.0357	173.439	44.6198	189.352
81.8533	174.423	50.5503	180.441	83.7134	178.743	68.2878	142.671	56.4787	183.727	41.5556	171.841	35.6234	198.013	43.3922	193.709	64.5104	172.873	71.826	182.723	42.0396	172.748	44.4537	188.484
81.8582	173.544	50.7311	179.536	83.5475	177.882	68.1214	141.892	56.4817	182.836	41.5552	171.149	35.6269	196.918	43.5648	192.772	64.344	172.031	71.9999	181.98	41.8738	171.915	44.6274	187.739
81.6928	172.695	50.4014	178.72	83.5517	176.995	68.1251	141.086	56.484	182.124	41.5553	170.286	35.6291	196.189	43.2267	191.925	64.1776	171.191	71.834	181.117	41.8782	171.055	44.4613	186.875
81.6971	171.995	50.412	177.849	83.3858	176.138	67.9587	140.311	56.4868	181.236	41.5555	169.425	35.6313	195.462	43.7391	191.115	64.1815	170.324	71.8384	180.228	42.0529	170.167	44.4654	185.983
81.7019	171.12	50.4226	176.978	83.5596	175.402	67.9629	139.348	56.4898	180.35	41.3855	168.594	35.6342	194.555	43.5712	190.241	64.1847	169.631	71.8421	179.517	42.0573	169.311	44.4689	185.271
81.7068	170.248	50.4327	176.284	83.3936	174.548	67.9667	138.548	56.3224	179.494	41.7261	167.678	35.637	193.649	43.4027	189.549	64.0189	168.624	71.6762	178.659	42.0611	168.627	44.3027	184.412
81.711	169.551	50.4433	175.417	83.3979	173.667	67.8002	137.779	56.3253	178.611	41.3858	166.881	35.4697	192.774	43.4051	188.65	64.0221	167.934	71.6805	177.775	41.8953	167.802	44.1366	183.554
81.7158	168.682	50.2837	174.581	83.4021	172.788	67.9741	136.953	56.3276	177.906	41.2158	166.056	35.3017	192.081	43.2372	187.782	64.0259	167.074	71.514	177.097	41.8997	166.95	44.1407	182.669
81.8909	167.785	50.4645	173.688	83.2361	171.94	67.8081	136.028	56.3304	177.027	41.3855	165.344	35.4747	191.151	43.5793	187.007	63.8595	166.244	71.5189	176.039	41.7339	166.129	44.1441	181.962
81.5553	166.978	50.6447	172.97	83.2397	171.24	67.6416	135.264	56.1631	176.178	41.3862	164.324	35.3073	190.281	43.2412	186.171	64.0335	165.358	71.5226	175.336	41.9085	165.252	44.1482	181.081
81.5601	166.114	50.4857	171.967	83.2439	170.366	67.4757	134.345	56.166	175.302	41.5566	163.446	35.4797	189.534	43.4137	185.249	63.8671	164.532	71.5269	174.458	41.7427	164.435	43.982	180.23
81.7351	165.222	50.3261	171.138	83.2481	169.493	67.4793	133.556	56.1688	174.428	41.3859	162.797	35.3124	188.667	43.2458	184.388	63.8709	163.679	71.361	173.61	41.9173	163.561	44.1562	179.323
81.7393	164.534	50.5069	170.252	83.2523	168.623	67.483	132.768	56.0009	173.759	41.3861	161.951	35.1449	187.802	43.2475	183.676	63.7044	162.856	71.3652	172.736	41.9217	162.718	43.8199	178.504
81.5739	163.704	50.3467	169.598	83.2564	167.754	67.317	131.855	55.8335	172.917	41.3867	160.939	35.1471	187.088	43.0796	182.818	63.8784	161.978	71.1993	171.892	41.5856	161.935	43.9935	177.775
81.7489	162.818	50.3572	168.745	83.0898	167.09	67.1505	131.101	56.0065	172.018	41.3863	160.266	35.1499	186.198	43.2521	181.903	63.712	161.159	71.203	171.196	41.59	161.096	43.9975	176.902
81.5835	161.991	50.3678	167.893	83.094	166.224	67.1542	130.32	56.1796	171.122	41.2162	159.454	35.1527	185.309	43.2543	181.019	63.5455	160.342	71.2073	170.326	41.5949	160.091	44.0015	176.031
81.5882	161.138	50.2082	167.073	83.0981	165.361	66.9881	129.414	56.0116	170.458	41.2163	158.616	34.9853	184.45	43.256	180.314	63.7195	159.468	71.2115	169.458	41.5987	159.423	43.6651	175.219
81.593	160.286	50.3889	166.196	83.1023	164.499	67.162	128.607	56.0144	169.594	41.2164	157.779	35.1577	183.713	43.0881	179.462	63.553	158.655	71.2157	168.592	41.603	158.589	43.6685	174.525
81.4276	159.465	50.2293	165.379	83.1064	163.638	66.9959	127.705	55.847	168.76	41.2165	156.944	35.1604	182.829	43.0903	178.583	63.5567	157.814	70.8796	167.786	41.6079	157.59	43.5029	173.515
81.4323	158.617	50.0696	164.564	83.11	162.952	66.9996	126.932	55.6796	167.929	41.0469	155.974	35.1632	181.946	43.0926	177.706	63.3903	157.004	70.8838	166.924	41.4415	156.955	43.5069	172.65
81.2669	157.799	50.2503	163.693	82.9445	161.953	67.0037	126.006	55.6824	167.07	40.8768	155.172	34.9952	181.271	43.0943	177.005	63.394	156.166	70.8881	166.063	41.616	156.098	43.5103	171.96
81.4418	156.925	50.0906	162.881	82.9481	161.269	66.8377	125.112	55.6852	166.213	40.8763	154.508	34.9979	180.392	43.0965	176.131	63.3977	155.331	70.8923	165.205	41.4507	155.135	43.5143	171.099
81.4466	156.082	50.1012	162.043	82.9528	160.245	66.5009	124.402	55.688	165.357	40.8769	153.515	35.0007	179.515	42.9285	175.288	63.2312	154.526	70.7257	164.548	41.4544	154.475	43.348	170.269
81.2811	155.27	50.2819	161.176	82.6159	159.622	66.6747	123.607	55.6908	164.504	40.877	152.69	34.8332	178.668	42.9308	174.418	63.2349	153.694	70.7299	163.692	41.1189	153.545	43.1818	169.441
81.2858	154.431	50.1222	160.37	82.7908	158.573	66.5086	122.72	55.5234	163.681	41.0472	151.837	34.8359	177.794	43.1032	173.52	62.8982	152.922	70.5639	162.868	41.4636	152.666	43.1858	168.585
81.2905	153.593	49.7923	159.595	82.7943	157.895	66.3425	121.835	55.5261	162.831	40.877	151.044	34.8381	177.097	42.9346	172.856	63.2423	152.036	70.7383	161.987	41.1275	151.905	43.3599	167.702
81.2952	152.757	49.973	158.734	82.7984	157.049	66.3461	121.076	55.5283	162.152	40.8771	150.223	34.6706	176.255	42.9368	171.99	63.0758	151.238	70.7425	161.136	41.302	151.058	43.3639	166.85
81.3	151.923	49.8133	157.933	82.8025	156.204	66.18	120.195	55.5316	161.136	40.8771	149.405	34.6733	175.386	42.7688	171.156	62.9098	150.278	70.4063	160.346	40.9658	150.3	43.0274	166.058
81.3047	151.091	49.8238	157.105	82.8066	155.362	66.1836	119.44	55.704	160.431	41.0473	148.559	34.676	174.519	42.771	170.294	63.0831	149.59	70.4105	159.499	41.3105	149.428	43.0313	165.209
81.1392	150.29	49.8348	156.114	82.8107	154.521	66.1877	118.535	55.3669	159.478	40.8772	147.773	34.6787	173.654	42.7732	169.434	62.9171	148.634	70.5849	158.625	41.1451	148.483	43.0353	164.362
81.314	149.432	49.8453	155.29	82.6446	153.711	66.1912	117.783	55.3697	158.636	40.7069	146.989	34.6814	172.791	42.945	168.718	62.75	148.008	70.4188	157.811	41.1494	147.673	43.0392	163.517
80.9789	148.498	49.8558	154.467	82.4784	152.902	66.0251	116.912	55.3718	157.965	40.7075	146.015	34.5139	171.958	42.6074	167.748	62.7542	147.027	70.2528	156.999	41.1537	146.864	42.8729	162.703
81.1532	147.809	49.696	153.676	82.4825	152.067	65.8589	116.044	55.3751	156.96	40.7075	145.206	34.516	171.27	42.6096	166.894	62.9281	146.182	70.257	156.16	40.9877	146.087	43.047	161.832
81.1579	146.986	49.7065	152.857	82.4866	151.233	66.0327	115.269	55.3779	156.124	40.5373	144.428	34.5187	170.412	42.6118	166.041	62.7615	145.398	70.4313	155.293	40.8217	145.311	42.8807	161.022
80.9923	146.193	49.7169	152.04	82.3204	150.43	65.6963	114.435	55.3806	155.29	40.5373	143.622	34.5214	169.555	42.7835	165.331	62.7652	144.586	70.2652	154.486	40.9967	144.319	42.7144	160.213
80.9976	145.21	49.8976	151.195	82.3245	149.6	65.8705	113.516	55.2131	154.487	40.7075	142.789	34.3538	168.729	42.6155	164.51	62.5992	143.643	70.2694	153.652	40.8308	143.547	42.7183	159.377
80.832	144.421	49.5676	150.44	82.3285	148.772	65.8741	112.776	55.2158	153.656	40.7075	141.987	34.5267	167.847	42.6176	163.662	62.4326	142.864	70.2735	152.819	40.835	142.748	42.7222	158.543
81.0069	143.576	49.578	149.628	82.3325	147.945	65.7079	111.92	55.2185	152.827	40.3675	141.085	34.3591	167.025	42.6198	162.816	62.4362	142.057	70.2777	151.989	40.8392	141.951	43.0665	157.652
81.0115	142.762	49.4188	148.685	82.3371	146.955	65.5417	111.066	55.051	152.03	40.5382	140.098	34.1916	166.205	42.6219	161.971	62.4404	141.092	70.1116	151.189	40.6737	141.025	42.5598	156.908
81.0161	141.95	49.7696	147.819	82.171	146.162	65.5457	110.186	55.0536	151.205	40.1972	139.519	34.1942	165.357	42.2837	161.187	62.6136	140.421	70.1157	150.362	40.8481	140.203	42.7338	156.05
80.8506	141.168	49.6098	147.042	82.175	145.341	65.379	109.484	55.0563	150.381	40.368	138.537	34.1969	164.511	42.456	160.317	62.2773	139.518	70.1198	149.536	40.8524	139.411	42.3973	155.281
80.8557	140.198	49.45	146.267	82.179	144.522	65.3834	108.463	55.059	149.56	40.3679	137.744	34.1995	163.667	42.4581	159.478	62.2809	138.72	70.1245	148.548	40.6869	138.493	42.5713	154.427
80.6901	139.42	49.461	145.304	82.183	143.704	65.2167	107.764	54.8914	148.769	40.538	136.924	33.8617	162.882	42.4603	158.641	62.1143	137.952	69.9583	147.756	40.6911	137.705	42.405	153.632
80.6947	138.616	49.4714	144.504	82.0168	142.918	65.2207	106.894	55.0649	147.759	40.3683	136.007	34.0346	162.013	42.4624	157.805	62.1179	137.156	69.9619	147.1	40.6952	136.919	42.4094	152.646
80.8696	137.783	49.4817	143.705	82.0213	141.941	65.2246	106.026	54.8968	147.135	40.3682	135.22	33.867	161.203	42.2943	157.001	61.9523	136.075	69.6261	146.177	40.6994	136.135	42.5829	151.961
80.8742	136.982	49.3219	142.938	82.0253	141.13	64.8877	105.364	54.7298	146.187	40.0277	134.493	33.8696	160.366	42.2964	156.169	61.9554	135.442	69.6308	145.198	40.5339	135.226	42.4171	151.008
80.8787	136.183	49.3328	141.984	81.8591	140.349	65.0618	104.471	54.7324	145.375	40.1984	133.524	33.8722	159.531	42.2985	155.339	61.7893	134.524	69.6343	144.547	40.7083	134.416	42.2507	150.221
80.7137	135.255	49.3432	141.191	81.8631	139.541	64.896	103.497	54.735	144.564	40.3685	132.714	33.8748	158.697	42.3006	154.51	61.963	133.708	69.4687	143.601	40.3725	133.541	42.2545	149.407
80.7182	134.459	49.3536	140.4	81.867	138.735	64.7293	102.811	54.9084	143.565	40.1982	131.963	33.8774	157.866	42.4729	153.655	61.7964	132.951	69.4727	142.791	40.3767	132.764	42.2583	148.594
80.7228	133.665	49.3645	139.453	81.871	137.93	64.7337	101.813	54.5706	142.816	40.0284	131.06	33.88	157.036	42.3053	152.694	61.6302	132.04	69.4768	141.982	40.3813	131.835	42.0925	147.651
80.3875	132.773	49.2046	138.695	81.7047	137.156	64.5674	100.99	54.5733	142.012	40.1985	130.255	33.7123	156.237	42.3068	152.036	61.8045	131.073	69.3106	141.204	40.3855	131.063	42.2665	146.813
80.5623	131.954	49.2149	137.909	81.8794	136.166	64.5708	100.282	54.5759	141.209	39.8585	129.385	33.7155	155.245	42.3094	151.051	61.9777	130.42	69.4854	140.21	40.3896	130.292	41.9299	146.064
80.737	131.137	49.0556	136.998	81.5435	135.266	64.5747	99.4339	54.5785	140.407	39.8583	128.614	33.7175	154.586	42.3109	150.395	61.8115	129.515	69.4895	139.407	40.3943	129.37	41.7634	145.288
80.7416	130.351	49.0659	136.217	81.5469	134.629	64.4083	98.618	54.5811	139.608	39.8587	127.69	33.7206	153.598	42.1433	149.443	61.6449	128.769	69.4935	138.606	40.3989	128.45	41.7672	144.485
80.4062	129.468	49.0763	135.437	81.5514	133.675	64.242	97.8047	54.414	138.68	40.0288	126.893	33.5529	152.807	42.1454	148.628	61.6489	127.84	69.1571	137.865	40.4025	127.838	41.7715	143.523
80.581	128.656	48.9169	134.533	81.5553	132.881	64.2463	96.8248	54.4166	137.884	40.0286	126.127	33.5549	152.152	41.9772	147.843	61.312	127.126	69.3313	137.038	40.2369	126.952	41.6051	142.753
80.4158	127.749	48.9272	133.757	81.5592	132.09	64.0795	96.1564	54.4192	137.091	39.6886	125.269	33.558	151.171	42.1494	147.002	61.316	126.202	69.3359	136.083	40.2415	126.039	41.7791	141.926
80.2501	127	48.938	132.828	81.5637	131.143	64.0838	95.1825	54.252	136.17	39.8586	124.478	33.7308	150.326	41.9818	146.059	61.4897	125.404	69.1697	135.319	40.2456	125.28	41.6132	141
80.4254	126.039	48.9483	132.057	81.5676	130.355	63.9175	94.3799	54.4248	135.351	39.859	123.566	33.7333	149.513	42.1535	145.383	61.3235	124.514	69.004	134.398	40.2502	124.371	41.4467	140.236
80.4299	125.264	48.7889	131.162	81.4013	129.599	63.7511	93.5799	54.2572	134.592	39.8593	122.657	33.5656	148.73	41.9858	144.445	61.327	123.75	69.008	133.608	40.0846	123.495	41.4504	139.444
80.2642	124.52	48.9694	130.365	81.4052	128.815	63.7549	92.7531	54.4305	133.619	39.8591	121.901	33.3985	147.788	42.1581	143.611	61.1607	122.864	68.8418	132.85	40.2588	122.713	41.4547	138.496
80.2692	123.595	48.9797	129.598	81.4096	127.877	63.7587	91.9288	54.0926	132.893	39.859	121.147	33.2308	147.009	41.8202	142.706	61.1642	122.104	69.016	132.034	40.0932	121.841	41.6287	137.678
80.2742	122.673	48.8203	128.71	81.4134	127.097	63.5928	90.9997	54.2653	132.082	39.6891	120.273	33.4035	146.174	41.9924	141.877	60.998	121.223	68.68	131.152	40.0973	121.092	41.4622	136.921
80.1085	121.935	48.6609	127.825	81.2476	126.192	63.5965	90.181	54.2684	131.145	39.6894	119.373	33.406	145.369	41.8242	141.107	61.1716	120.437	68.8547	130.184	39.9316	120.225	41.4659	136.137
80.113	121.171	48.6711	127.065	81.4217	125.387	63.4301	89.3942	54.1007	130.396	39.6897	118.476	33.2383	144.596	41.9964	140.281	60.8352	119.591	68.8587	129.404	39.9356	119.48	41.2999	135.227
80.1179	120.255	48.6819	126.155	81.0857	124.517	63.4339	88.5807	54.1033	129.619	39.6895	117.73	33.0711	143.664	41.8281	139.515	60.8391	118.688	68.693	128.5	40.1104	118.559	41.3042	134.29
80.1224	119.494	48.6921	125.399	81.2597	123.715	63.2674	87.799	53.9361	128.719	39.5195	116.866	33.2438	142.837	41.6604	138.592	60.6723	117.967	68.5262	127.908	40.1149	117.67	41.1377	133.541
80.1274	118.583	48.5326	124.523	81.0939	122.82	63.2717	86.856	53.9386	127.946	39.5193	116.124	33.2463	142.04	41.6624	137.801	60.6763	117.068	68.7009	126.949	39.9487	116.96	41.1414	132.764
79.9621	117.704	48.5434	123.62	81.0977	122.052	63.1052	86.08	54.1118	126.992	39.5196	115.236	32.9089	141.144	41.6643	137.011	60.6802	116.173	68.5346	126.206	39.6128	116.135	40.9754	131.864
79.7964	116.978	48.3834	122.899	81.1021	121.132	63.1094	85.1435	53.9441	126.252	39.5198	114.351	33.0815	140.322	41.6668	136.066	60.5134	115.458	68.3688	125.31	39.7876	115.223	41.1493	131.062
79.8008	116.225	48.3941	122.001	81.1059	120.368	62.9429	84.373	53.7769	125.361	39.3499	113.497	32.9138	139.56	41.6688	135.28	60.5173	114.567	68.3733	124.388	39.6218	114.373	40.9832	130.166
79.9759	115.294	48.4043	121.255	81.1097	119.606	62.7764	83.605	53.6097	124.473	39.3496	112.763	32.9168	138.613	41.5005	134.526	60.5212	113.679	68.3772	123.621	39.7965	113.467	40.9869	129.397
79.9804	114.545	48.4151	120.362	80.9438	118.722	62.7801	82.8102	53.7824	123.681	39.1796	111.914	32.9192	137.826	41.6732	133.558	60.3549	112.822	68.2109	122.886	39.6303	112.768	40.9911	128.477
79.9853	113.648	48.4252	119.619	81.1184	117.783	62.7843	81.8862	53.7848	122.92	39.1799	111.038	32.9216	137.041	41.5049	132.808	60.3582	112.086	68.2153	121.97	39.6348	111.896	40.8245	127.741
79.82	112.783	48.4359	118.731	80.952	117.056	62.6177	81.1264	53.7878	122.009	39.3503	110.136	32.7538	136.286	41.677	132	60.3621	111.205	68.0495	121.087	39.469	111.056	40.8282	126.978
79.8244	112.04	48.4466	117.845	80.7861	116.18	62.6219	80.2089	53.6206	121.13	39.1803	109.295	32.7568	135.348	41.5093	131.098	60.1953	110.502	68.0534	120.328	39.4735	110.189	40.8323	126.065
79.8293	111.15	48.2871	116.991	80.7899	115.427	62.4553	79.4546	53.623	120.375	39.18	108.571	32.7592	134.568	41.6814	130.294	60.1996	109.48	68.228	119.391	39.4774	109.469	40.6663	125.183
79.8342	110.263	48.2973	116.257	80.9643	114.497	62.4594	78.5436	53.6255	119.622	39.1802	107.705	32.7621	133.635	41.3434	129.426	60.2035	108.607	68.0616	118.665	39.4819	108.606	40.4997	124.455
79.8386	109.526	48.3079	115.378	80.7979	113.778	62.2929	77.7949	53.4582	118.749	39.0102	106.871	32.5943	132.888	41.5155	128.627	60.0366	107.91	67.8958	117.791	39.3166	107.633	40.5038	123.549
79.6732	108.673	48.3181	114.648	80.9724	112.852	62.1268	76.9198	53.4611	117.851	39.0103	106.011	32.4271	131.989	41.1775	127.763	60.0404	107.041	68.0699	117.011	39.3205	106.919	40.6776	122.767
79.8483	107.764	48.159	113.658	80.6362	112.018	62.1308	76.0187	53.4641	116.954	39.1802	105.266	32.7699	131.159	41.5198	126.938	60.0442	106.175	67.904	116.142	39.4952	106.035	40.5115	121.894
79.6825	107.063	48.3394	112.902	80.4703	111.156	62.1344	75.2491	53.4665	116.209	39.0102	104.439	32.4323	130.293	41.3514	126.203	60.0476	105.456	67.7382	115.275	39.3289	105.354	40.5157	120.995
79.6873	106.188	48.1798	112.063	80.8144	110.357	61.9678	74.5115	53.4694	115.318	38.8401	103.615	32.4347	129.525	41.3538	125.288	60.0514	104.594	67.742	114.53	39.3337	104.363	40.349	120.278
79.6921	105.315	48.1904	111.196	80.648	109.648	61.8017	73.6494	53.3016	114.606	38.8402	102.764	32.4376	128.606	41.1855	124.556	59.885	103.765	67.7464	113.639	39.6781	103.599	40.1829	119.413
79.3566	104.504	48.0308	110.362	80.4825	108.646	61.8057	72.7613	53.3045	113.719	38.8404	101.916	32.2698	127.871	41.358	123.616	59.719	102.795	67.5805	112.779	39.5122	102.783	40.187	118.521
79.5316	103.607	48.0409	109.644	80.4867	107.765	61.6395	71.9061	53.3074	112.834	39.0107	101.041	32.2726	126.957	41.1902	122.738	59.7223	102.084	67.5843	112.04	39.1762	102	40.1911	117.632
79.5359	102.886	48.052	108.642	80.4904	107.032	61.8137	70.9955	53.14	111.982	38.8406	100.227	32.275	126.196	41.3622	121.954	59.7261	101.233	67.4184	111.185	39.181	101.021	40.0244	116.922
79.371	101.91	47.8919	107.958	80.4946	106.156	61.4769	70.302	53.1424	111.249	38.8407	99.3861	32.1071	125.467	41.1944	121.08	59.5596	100.414	67.4227	110.304	39.3551	100.294	40.1987	116.009
79.3758	101.05	47.9024	107.104	80.3286	105.312	61.651	69.3979	53.1453	110.372	38.8408	98.548	32.2802	124.53	41.1962	120.329	59.5634	99.5678	67.427	109.425	39.0195	99.3793	40.032	115.303
79.5503	100.306	47.913	106.252	80.3323	104.585	61.3146	68.5856	52.9779	109.527	38.8409	97.7124	32.1128	123.654	41.0283	119.46	59.3969	98.7537	67.4308	108.694	39.3643	98.4892	39.8659	114.452
79.3849	99.4808	47.9236	105.404	80.3365	103.716	61.3181	67.8417	52.9803	108.8	38.841	96.8794	32.1151	122.902	41.0306	118.564	59.2305	97.9422	67.2648	107.849	38.858	97.7484	40.0401	113.546
79.2194	98.6578	47.7639	104.587	80.1705	102.879	61.1523	66.8832	52.9836	107.785	38.6709	96.0784	31.7776	122.06	41.0324	117.819	59.4044	97.0746	67.0989	107.007	38.8623	96.922	39.8739	112.701
79.2242	97.808	47.7749	103.603	80.1746	102.015	60.986	66.052	52.9859	107.063	38.6709	95.2505	31.9506	121.133	41.0348	116.928	59.2384	96.1292	67.2734	106.108	39.0368	96.0689	39.7077	111.858
79.229	96.9608	47.6148	102.931	80.1788	101.154	60.9899	65.1948	52.8185	106.227	38.671	94.4252	31.9529	120.387	40.8663	116.216	59.2416	95.435	67.1074	105.271	38.8709	95.2771	39.7113	111.133
79.0635	96.1455	47.7955	102.063	79.8425	100.354	60.8236	64.3706	52.8214	105.365	38.671	93.6025	31.9557	119.493	40.8686	115.33	59.2453	94.6044	66.9415	104.436	38.8752	94.4584	39.7153	110.266
79.0682	95.3034	47.6363	101.118	80.0169	99.4681	60.8275	63.5204	52.6539	104.535	38.5008	92.8117	31.7883	118.632	40.8709	114.446	58.9091	93.6973	66.9457	103.575	38.8795	93.6423	39.7193	109.401
79.2432	94.4345	47.6463	100.423	79.8508	98.6438	60.831	62.7944	52.6567	103.678	38.3311	91.8874	31.7905	117.892	40.8727	113.711	59.0829	92.8429	66.9494	102.859	38.8842	92.6935	39.553	108.568
78.9075	93.6563	47.4871	99.4835	79.8544	97.9344	60.4945	62.0096	52.4893	102.852	38.3311	91.0728	31.963	117.124	40.8749	112.832	59.0866	92.0204	66.7834	102.031	38.8885	91.883	39.7272	107.679
79.0824	92.7925	47.4975	98.6556	79.859	96.9441	60.6685	61.1399	52.6618	102.113	38.3311	90.2607	31.7961	116.123	40.707	111.984	58.9201	91.2299	66.6179	101.064	38.7225	91.1044	39.5605	106.994
78.9169	91.99	47.6782	97.8009	79.6924	96.2683	60.3324	60.2429	52.6651	101.122	38.1609	89.4806	31.7983	115.388	40.8794	111.081	58.9237	90.4125	66.6216	100.355	38.7268	90.299	39.5644	106.139
78.9216	91.1608	47.1781	97.0662	79.8667	95.3951	60.1664	59.3209	52.6673	100.416	38.3311	88.6443	31.8011	114.51	40.7115	110.238	58.7576	89.4916	66.6258	99.5055	38.7315	89.3626	39.2285	105.204
78.9263	90.3341	47.3587	96.2166	79.5304	94.6125	60.1698	58.6103	52.4999	99.6007	38.1614	87.7355	31.6336	113.663	40.543	109.543	58.5911	88.7091	66.63	98.659	38.7357	88.5627	39.5728	104.296
78.9309	89.51	47.3692	95.399	79.7052	93.6049	60.1737	57.7845	52.5026	98.7586	38.3315	86.9047	31.6359	112.935	40.5452	108.676	58.2543	87.9587	66.464	97.8443	38.5697	87.7948	39.2358	103.649
79.1058	88.659	47.3796	94.5839	79.7088	92.9083	60.0076	56.8745	52.5054	97.9191	38.3315	86.1059	31.4684	112.093	40.5474	107.812	58.4281	87.1226	66.4686	96.8629	38.5739	87.0001	39.0696	102.833
78.9403	87.8694	47.3901	93.7713	79.7128	92.0747	59.8412	56.0857	52.3379	97.1115	38.1617	85.2066	31.6413	111.195	40.5496	106.95	58.6024	86.1553	66.4723	96.1641	38.4083	86.1055	39.2442	101.822
78.9454	86.9171	47.2303	92.9908	79.7169	91.2437	59.8454	55.1548	52.3406	96.2771	38.1617	84.4133	31.3036	110.387	40.3816	106.12	58.4358	85.3836	66.6467	95.2984	38.413	85.1851	39.2476	101.122
78.95	86.1037	47.2412	92.049	79.5507	90.4446	59.6789	54.3735	52.3438	95.3068	38.1616	83.6226	31.3063	109.523	40.3838	105.263	58.2696	84.4816	66.3109	94.3847	38.2469	84.4283	39.252	100.146
78.7844	85.3222	47.2516	91.2446	79.5552	89.4813	59.5125	53.5957	52.1763	94.5074	38.1619	82.7034	31.1388	108.691	40.386	104.409	58.103	83.7154	66.1443	93.7216	38.4218	83.4849	39.0852	99.4801
78.9593	84.4845	47.0922	90.3388	79.5592	88.6584	59.5162	52.7918	52.179	93.6811	38.1619	81.9182	31.3112	107.946	40.2179	103.587	58.2768	82.893	66.3191	92.7258	38.4259	82.7043	38.9193	98.5392
78.6235	83.7375	46.9324	89.5693	79.5632	87.8381	59.5203	51.8774	52.0114	92.8867	37.8218	81.0643	31.3139	107.09	40.3903	102.709	58.1101	82.132	66.153	91.9295	38.2599	81.9556	38.9232	97.7103
78.7987	82.7713	47.113	88.7436	79.397	87.0496	59.1836	51.1401	52.0141	92.0656	37.8217	80.2847	31.3165	106.236	40.052	101.921	57.9439	81.2425	65.8167	91.1652	38.0942	81.0805	39.0973	96.8546
78.6331	82.0005	46.9536	87.8472	79.401	86.2344	59.1877	50.2342	52.0168	91.2469	37.822	79.3784	31.1495	105.272	40.2239	101.188	57.9479	80.327	65.991	90.3154	38.0984	80.308	38.7607	96.0896
78.6381	81.0701	47.1342	87.0271	79.2348	85.4512	59.0212	49.4749	52.0199	90.2952	37.8219	78.6044	31.1516	104.565	40.226	100.347	57.9514	79.5451	65.8249	89.5268	38.1029	79.4099	38.7645	95.2684
78.6427	80.2755	46.9743	86.2683	79.2393	84.5063	58.855	48.6071	51.8523	89.5115	37.9924	77.6751	30.9841	103.748	40.2282	99.5074	57.9554	78.6361	65.829	88.7115	38.1075	78.5154	38.7688	94.3136
78.4771	79.5128	46.8149	85.3814	79.2432	83.6993	58.8591	47.7143	51.8549	88.701	37.6519	76.9655	30.9867	102.905	40.0601	98.7002	57.7887	77.8892	65.6633	87.7929	38.2818	77.7219	38.6024	93.5273
78.4821	78.592	46.655	84.6281	79.0774	82.7903	59.0333	46.7965	51.8576	87.8931	37.6522	76.0721	30.8191	102.093	40.0622	97.8661	57.7927	76.9867	65.6673	86.9831	37.9459	76.8928	38.6063	92.7142
78.4866	77.8054	46.836	83.6889	78.9112	82.0181	58.5263	46.1118	51.6904	86.9832	37.8222	75.2798	30.9924	101.086	39.8941	97.064	57.6259	76.2454	65.5012	86.2053	37.95	76.1343	38.6101	91.9037
78.4916	76.8911	46.8463	82.9118	79.0853	81.1898	58.5303	45.2321	51.8633	86.1514	37.6523	74.4223	30.9946	100.389	39.8962	96.2351	57.6299	75.3494	65.6759	85.2373	37.7843	75.2822	38.4436	91.1251
78.3259	76.1395	46.5166	82.0673	79.0893	80.3934	58.3637	44.4957	51.8659	85.3516	37.4823	73.5684	30.6567	99.6145	40.2391	95.2126	57.6333	74.5841	65.6799	84.4357	37.959	74.3746	38.4479	90.1857
78.3304	75.3611	46.6971	81.2663	78.9234	79.4969	58.3677	43.6246	51.6982	84.5838	37.3123	72.718	30.8295	98.7544	40.0705	94.5556	57.467	73.724	65.5137	83.6659	37.9631	73.6247	38.2815	89.4127
78.1652	74.4857	46.5376	80.3988	78.9274	78.706	58.3717	42.758	51.5311	83.6863	37.4823	71.9371	30.6619	97.9554	40.0731	93.5978	57.4709	72.838	65.1778	82.7957	37.7973	72.7825	38.2852	88.6129
78.1701	73.5842	46.5479	79.6329	78.761	77.9472	58.0352	41.9552	51.7038	82.8652	37.4826	71.0637	30.6649	96.9924	39.9049	92.8089	57.3042	72.1107	65.352	81.9728	37.8018	71.9143	38.289	87.8156
78.3448	72.785	46.3888	78.6449	78.7654	77.0307	58.0391	41.0977	51.5366	81.9742	37.4828	70.1938	30.4973	96.199	40.0772	91.9639	57.4782	71.2017	65.356	81.1818	37.8062	71.0496	38.123	86.9181
78.0093	71.9489	46.2289	77.9144	78.5991	76.2774	57.7026	40.304	51.7094	81.1587	37.3123	69.4804	30.4998	95.3789	39.909	91.1801	57.1417	70.3846	65.1902	80.2916	37.6405	70.2179	38.1267	86.1263
78.1844	71.028	46.4098	77.0015	78.6034	75.3675	57.7065	39.4556	51.5417	80.4045	37.3129	68.4939	30.5024	94.5613	39.911	90.3696	57.1451	69.6364	65.024	79.5356	37.6445	69.4826	37.7905	85.2647
78.0187	70.2962	46.2498	76.2765	78.7775	74.5609	57.5401	38.6415	51.2043	79.5524	37.3127	67.757	30.3347	93.7757	39.5731	89.486	57.1493	68.6429	65.0284	78.6225	37.8191	68.5984	37.9644	84.4491
78.0232	69.5374	46.2604	75.3995	78.6116	73.6869	57.544	37.8023	51.3775	78.6156	37.4826	66.9932	30.5079	92.7987	39.9155	88.6222	56.8123	67.9597	65.0323	77.8426	37.3128	67.8356	37.9686	83.5352
78.028	68.6555	46.2711	74.526	78.6154	72.9153	57.5478	36.9676	51.2098	77.87	37.313	66.0475	30.3402	92.0186	39.7473	87.8492	56.9864	67.0676	64.6963	76.9948	37.3172	66.9878	37.8021	82.7839
78.0329	67.777	46.1115	73.6855	78.4495	72.0477	57.3818	36.0636	51.2123	77.0975	37.1429	65.2275	30.1725	91.2411	39.5795	86.9457	56.8199	66.2379	64.7002	76.2205	37.322	66.0233	37.8062	81.8765
78.0373	67.0268	46.1217	72.9425	78.2831	71.3111	57.2154	35.2683	51.2152	76.1996	37.143	64.3815	30.175	90.4367	39.7517	86.1194	56.8237	65.3823	64.5344	75.3498	37.326	65.3028	37.8099	81.1014
78.0421	66.1548	46.1323	72.079	78.4576	70.3912	57.0493	34.3752	51.0475	75.4621	36.9729	63.5685	30.178	89.5016	39.5835	85.3545	56.8275	64.5301	64.5387	74.4532	37.3303	64.4656	37.6438	80.2298
78.047	65.2863	46.1429	71.219	78.2916	69.5336	57.0531	33.5599	51.0504	74.5706	36.9731	62.7294	30.1804	88.7028	39.5855	84.5627	56.6611	63.711	64.5427	73.6874	37.1649	63.5425	37.6475	79.4603
77.8812	64.5741	45.9833	70.3919	78.2958	68.6501	56.8867	32.7788	51.0533	73.6826	37.1433	61.8644	30.0132	87.8035	39.4177	83.6717	56.4946	62.8953	64.3768	72.8267	37.3394	62.6831	37.4814	78.5952
77.886	63.7121	45.9939	69.5388	78.1294	67.9251	56.7202	32.0022	50.8855	72.9537	36.803	61.0914	29.8454	87.0397	39.4196	82.8855	56.4983	62.0536	64.2109	71.9694	37.0033	61.9158	37.4855	77.7041
77.7205	62.883	46.0044	68.6893	78.1336	67.0481	56.7243	31.1007	50.8884	72.0722	36.8031	60.2628	29.8479	86.249	39.5922	81.9421	56.1616	61.2744	64.2148	71.2122	36.8374	61.1225	37.3189	76.9726
77.8955	61.9985	46.015	67.8432	77.9676	66.204	56.5581	30.2346	50.8913	71.1941	36.8031	59.4377	30.021	85.3004	39.4239	81.1908	56.1653	60.4397	64.2191	70.332	36.8421	60.1864	37.1527	76.1174
77.7301	61.1764	45.8549	67.1502	77.9714	65.458	56.2214	29.5025	50.7235	70.4738	36.8032	58.6161	30.0234	84.5152	39.4263	80.2833	56.1691	59.6085	64.0532	69.4848	36.846	59.4873	37.327	75.2069
77.7348	60.3284	45.8658	66.1909	77.9755	64.591	56.2257	28.5197	50.8965	69.5728	36.633	57.8275	29.6854	83.7915	39.258	79.5377	56.1731	58.6628	64.0574	68.6116	37.0209	58.5297	37.1604	74.4839
77.5694	59.5133	45.7061	65.3848	77.6397	63.6633	55.889	27.7979	50.559	68.7636	36.6334	56.8968	29.518	82.9112	39.2603	78.6367	56.0062	57.986	64.0617	67.7418	37.0251	57.7213	37.1644	73.6093
77.5741	58.6722	45.7166	64.5526	77.8136	62.8968	56.0628	26.9917	50.5618	67.8991	36.8036	56.0567	29.8609	82.0753	39.4328	77.7097	56.0103	57.0483	63.8953	67.0286	36.6893	56.8607	37.1684	72.7382
77.749	57.8051	45.7271	63.724	77.988	62.0107	55.7264	26.1828	50.7348	67.0085	36.4632	55.3086	29.5233	81.2309	39.2645	76.9726	56.1841	56.202	63.7293	66.1949	36.6936	56.0598	36.832	71.9295
77.4137	56.9111	45.7376	62.8988	77.8219	61.1871	55.7306	25.2249	50.7372	66.2732	36.6338	54.3609	29.6963	80.3017	39.2664	76.2086	56.0176	55.4183	63.9038	65.3056	36.6982	55.1488	36.836	71.0653
77.5883	56.1699	45.748	62.0771	77.826	60.3375	55.3942	24.4282	50.5698	65.4481	36.2933	53.6203	29.5285	79.5627	39.2687	75.3205	55.8514	54.5226	63.7378	64.4788	36.702	54.4684	36.84	70.2046
77.4231	55.2544	45.7589	61.1423	77.6599	59.5209	55.0576	23.6373	50.4023	64.6265	36.6341	52.6515	29.3611	78.6988	38.9305	74.4948	55.6848	53.7464	63.742	63.626	36.5364	53.5949	36.8435	69.4697
77.4274	54.5487	45.4289	60.3871	77.664	58.6783	55.2317	22.7632	50.5753	63.7493	36.4634	52.0018	29.3634	77.9359	38.9328	73.6138	55.6884	52.9441	63.576	62.8063	36.5409	52.6964	36.8475	68.6155
77.4325	53.6116	45.2691	59.6059	77.4979	57.8687	55.4058	21.8948	50.238	62.8439	36.1233	51.1593	29.3662	77.0491	38.7644	72.8908	55.5222	52.0609	63.4099	61.99	36.3749	51.9434	36.6816	67.673
77.2669	52.825	45.4502	58.6541	77.6722	57.0035	54.899	21.1509	50.2404	62.1235	36.2938	50.2326	29.369	76.1657	38.9369	71.9867	55.5258	51.2661	63.4141	61.1476	36.379	51.1644	36.6852	66.9471
77.1013	52.0419	45.2903	57.8804	77.506	56.2009	54.7329	20.2618	49.9031	61.226	36.1235	49.4809	29.0313	75.3448	38.9391	71.1156	55.3595	50.3916	63.4183	60.3088	36.3835	50.2784	36.6891	66.1033
77.2762	51.2032	45.3007	57.0806	77.1696	55.4312	54.9069	19.4114	50.076	60.3634	36.1242	48.4816	29.2038	74.564	38.9413	70.2479	55.1932	49.5215	63.0824	59.4135	36.2178	49.4265	36.3526	65.3221
77.2812	50.2827	45.1413	56.2004	77.5141	54.547	54.5706	18.5656	50.0787	59.5337	36.2939	47.789	29.2066	73.6906	38.7729	69.5365	55.1968	48.7382	63.2563	58.6712	36.2223	48.5496	36.5267	64.4558
77.1155	49.5105	45.1516	55.4081	77.5181	53.7253	54.2339	17.8163	50.0814	58.7075	36.1239	46.9386	29.2093	72.8207	38.7751	68.6753	55.2003	47.9583	63.2605	57.8428	36.2268	47.6773	36.3608	63.5333
77.1201	48.7123	45.162	54.6192	77.1817	52.9662	54.238	16.9247	49.9138	57.9143	36.2943	46.0335	29.0414	72.1073	38.4369	67.8766	55.034	47.1009	62.9246	56.9594	36.0611	46.839	36.1944	62.7335
77.1251	47.8043	45.0025	53.7515	77.1861	52.0354	54.0718	16.0698	49.7467	57.0078	35.7839	45.2513	28.8739	71.2734	38.6093	66.993	55.0378	46.2184	62.9286	56.1386	35.8949	46.113	36.1983	61.9077
76.9598	46.9305	44.843	52.8884	76.8496	51.2837	53.9053	15.3095	49.7494	56.1926	35.7837	44.493	29.0468	70.384	38.6114	66.1423	54.8715	45.37	62.7625	55.3507	36.2398	45.1946	36.2021	61.0854
76.7942	46.1733	45.0235	52.0815	77.0242	50.332	53.739	14.4682	50.0924	55.3218	35.9545	43.4936	28.8792	69.557	38.7838	65.2656	54.7051	44.5263	62.5968	54.4504	35.9034	44.5057	36.0358	60.2961
76.9693	45.2489	44.864	51.2269	77.0282	49.5288	53.5727	13.634	49.7546	54.5726	35.9543	42.7432	28.7117	68.7336	38.4455	64.4809	54.8788	43.7362	62.7711	53.6109	35.9082	43.5489	36.04	59.3646
76.8036	44.4992	44.8747	50.3473	76.8619	48.7585	53.4064	12.8069	49.5874	53.6827	35.7842	41.9195	28.7143	67.8841	38.4477	63.6406	54.8826	42.8714	62.4347	52.8636	35.9122	42.8088	36.214	58.5237
76.8085	43.6129	44.885	49.5814	76.8662	47.8488	53.0702	11.9321	49.4198	52.9114	35.6142	41.1004	28.717	67.0382	38.4498	62.8039	54.546	42.0703	62.4391	51.9462	35.9166	41.9671	36.0476	57.7454
76.6428	42.8706	44.7254	48.7399	76.6999	47.0861	52.9039	11.12	49.4228	52.0005	35.6143	40.2562	28.5494	66.2252	38.2817	62.0001	54.3796	41.2443	62.2729	51.1768	35.7511	41.0554	35.7109	57.0001
76.6476	41.9929	44.5658	47.903	76.8744	46.1554	52.9077	10.2853	49.4254	51.2072	35.4442	39.4462	28.7222	65.3567	38.454	61.1409	54.3834	40.3931	62.2773	50.2681	35.7554	40.2234	35.8853	56.0555
76.6525	41.1197	44.5764	47.041	76.5383	45.3179	52.5714	9.43483	49.4279	50.4174	35.4442	38.6112	28.5546	64.5507	38.2859	60.3441	54.2169	39.5761	62.1111	49.5061	35.5895	39.4256	35.549	55.2041
76.4871	40.2806	44.5866	46.2905	76.5422	44.5371	52.5752	8.61507	49.2607	49.5485	35.4443	37.7807	28.5572	63.7187	38.2879	59.5213	54.2206	38.7341	61.9453	48.6354	35.5938	38.6028	35.5528	54.4112
76.3217	39.4461	44.427	45.4667	76.7163	43.7302	52.2391	7.70023	49.2636	48.6547	35.4444	36.9547	28.3896	62.9196	38.2904	58.5853	54.2244	37.8966	61.9492	47.8515	35.4279	37.8141	35.5569	53.5093
76.3261	38.6938	44.2673	44.6474	76.3801	42.9053	52.0723	7.00596	49.0959	47.9059	35.4448	36.031	28.5624	62.0651	38.2924	57.77	54.0579	37.0933	61.9536	46.9598	35.4325	36.899	35.3904	52.7534
76.3309	37.8382	44.108	43.7275	76.3839	42.1355	51.9061	6.15864	49.2686	47.1015	35.2746	35.2444	28.3951	61.1559	38.2944	56.9581	54.0619	36.1617	61.7877	46.1022	35.4368	36.0904	35.2239	52.001
76.5059	36.9576	43.9483	42.9179	76.2183	41.1804	51.5699	5.27116	49.1013	46.2497	35.2746	34.4327	28.2275	60.3679	38.1263	56.1793	54.0652	35.4412	61.6218	45.2492	35.441	35.2864	35.3982	51.082
76.1702	36.1704	44.2993	42.0241	76.2221	40.4186	51.5739	4.41211	49.1041	45.373	34.9345	33.5842	28.4002	59.5243	38.1283	55.3745	53.899	34.5495	61.7959	44.4511	35.1052	34.4465	35.0618	50.2563
76.175	35.3285	43.9693	41.2532	76.2263	39.5522	51.4075	3.59143	49.107	44.5008	35.2749	32.7229	28.2325	58.7432	37.9605	54.4885	53.7328	33.6635	61.4597	43.6362	35.2799	33.5235	35.2361	49.3464
76.1797	34.4912	44.15	40.3981	76.0602	38.7199	51.071	2.80912	48.9396	43.6628	35.1046	31.9551	28.2354	57.8211	37.9628	53.5775	53.7361	32.9554	61.4637	42.8751	35.1139	32.7639	35.2398	48.5799
76.1844	33.6585	43.9903	39.6067	75.8938	37.9991	50.7344	2.03544	48.9421	42.9073	35.1049	31.0633	28.0677	57.0475	37.9648	52.7841	53.5698	32.0797	61.1278	41.9609	35.1184	31.8815	35.0736	47.7377
76.0192	32.7567	43.8308	38.7182	75.8983	37.0395	50.3955	1.9444	48.7747	42.0778	34.9346	30.3052	28.0702	56.2479	37.7965	52.0237	53.2334	31.2395	61.1321	41.1005	34.7825	31.0641	34.9074	46.9001
75.8537	31.9632	43.6711	37.9365	75.9024	36.1913	--	--	48.9476	41.1937	34.7647	29.454	28.073	55.3383	37.9687	51.2078	53.5777	30.2864	60.9661	40.2743	34.6164	30.3193	34.9113	46.0374
75.8583	31.1447	43.6818	37.0292	75.9065	35.3477	50.5667	1.91464	48.7802	40.3733	34.7649	28.579	27.9053	54.5757	37.971	50.3133	53.411	29.5264	60.9699	39.5292	34.9613	29.3941	34.7451	45.2089
75.863	30.3308	43.6922	36.2276	75.9106	34.5087			48.4425	39.5871	34.5949	27.7393	27.7379	53.7042	37.6329	49.4825	52.9043	28.7325	60.8043	38.6059	34.7952	28.659	34.749	44.3554
75.8676	29.5214	43.5324	35.4601	75.7441	33.8078			48.4453	38.7462	34.5947	26.9715	27.5705	52.8372	37.6352	48.5971	53.078	27.9229	60.6379	37.8984	34.7996	27.8041	34.7526	43.6123
75.7023	28.6459	43.3729	34.5985	75.7485	32.8738			48.2778	37.9395	34.425	26.0477	27.7431	52.027	37.4669	47.8558	53.0819	27.0509	60.642	37.0603	34.4639	26.9203	34.7565	42.7673
75.7069	27.8462	43.5538	33.6834	75.4121	32.1077			48.4507	37.0782	34.2546	25.3197	27.5757	51.1686	37.2989	47.0085	52.7453	26.244	60.4763	36.1524	34.4682	26.0775	34.5902	41.9564
75.5416	26.9816	43.3939	32.9308	75.2462	31.2142			48.2835	36.1775	34.2548	24.4729	27.5781	50.3953	37.3011	46.1362	52.7491	25.3835	60.3102	35.3536	34.4726	25.2405	34.5945	41.0164
75.5462	26.1916	43.2343	32.0858	75.5906	30.3392			48.2862	35.3554	34.2552	23.5387	27.2404	49.575	37.4732	45.3472	52.7529	24.5288	60.4849	34.3974	34.4769	24.4093	34.598	40.2892
75.3809	25.3379	43.245	31.2169	75.084	29.617			48.1187	34.5675	34.0851	22.7336	27.2432	48.7002	37.4754	44.4834	52.5864	23.7096	60.1485	33.6378	34.311	23.6135	34.2618	39.4186
75.3854	24.5576	43.0854	30.3835	75.2585	28.6803			48.1213	33.7546	34.0851	21.9047	27.2455	47.9384	37.3074	43.6538	52.4199	22.8961	59.9824	32.8532	34.1454	22.7327	34.2657	38.5969
75.5604	23.6555	43.2658	29.5915	74.922	27.9381			47.7839	32.9047	34.0852	21.0815	27.4184	47.0425	37.1394	42.8288	52.5936	22.1218	59.6464	32.0019	34.1497	21.9194	34.2698	37.678
75.0546	22.8778	42.9363	28.7043	75.0962	27.1116			47.7865	32.1014	33.7451	20.233	27.4211	46.1808	36.9713	42.0084	52.4274	21.227	59.8206	31.1678	34.154	21.1119	34.2733	36.9673
75.2296	21.9872	42.9465	27.9521	74.9306	26.1515			47.7894	31.2032	33.9153	19.3923	27.0834	45.3827	36.9735	41.1629	52.4311	20.4012	59.825	30.2681	33.9883	20.251	33.937	36.1178
75.0642	21.1618	42.7872	27.0481	74.7643	25.3945			47.792	30.4096	33.7451	18.6168	26.9158	44.5596	36.9756	40.3219	52.0946	19.5497	59.6588	29.5029	33.8223	19.4854	33.9412	35.2149
75.069	20.3124	42.7977	26.2138	74.9384	24.5828			47.6247	29.5519	33.745	17.8173	26.9185	43.7116	36.8075	39.5152	51.928	18.7657	59.6631	28.6141	33.8268	18.6084	33.9449	34.4172
74.9035	19.4985	42.4677	25.4446	74.6021	23.7677			47.4573	28.6999	33.5751	16.9655	26.9211	42.868	36.8096	38.6833	51.7615	17.9875	59.4969	27.8586	33.8312	17.7385	33.7788	33.5548
74.9082	18.6607	42.4782	24.6219	74.4361	22.9288			47.2897	27.9508	33.5753	16.091	26.9234	42.1336	36.6415	37.8857	51.7654	17.0965	59.5012	26.9807	33.6655	16.9054	33.7825	32.7667
74.7427	17.8583	42.3188	23.7442	74.4403	22.066			47.2925	27.0801	33.2351	15.2832	26.7561	41.2242	36.8138	37.0333	51.7692	16.2127	59.3352	26.1382	33.6699	16.0498	33.6164	31.9152
74.7474	17.0321	42.4997	22.8142	74.2742	21.2385			47.1251	26.2448	33.2353	14.423	26.7587	40.3943	36.646	36.1429	51.6026	15.4531	59.169	25.3975	33.5041	15.231	33.6201	31.1368
74.412	16.1801	42.3396	22.1287	74.2786	20.293			47.1279	25.3857	33.0652	13.5996	26.7616	39.4661	36.648	35.3298	51.6064	14.5828	58.8331	24.5003	33.3382	14.4193	33.4539	30.2962
74.4169	15.2759	42.0099	21.3006	73.942	19.6011			46.7903	24.5916	33.0653	12.7537	26.594	38.6756	36.65	34.5213	51.44	13.7493	58.8373	23.6455	33.3426	13.585	33.2876	29.4613
74.2513	14.4979	41.8503	20.45	74.1163	18.7316			46.793	23.744	32.8952	11.9445	26.5965	37.8599	36.312	33.6765	51.2736	12.923	58.6713	22.8261	33.1767	12.7875	33.2916	28.6026
74.2559	13.696	42.0312	19.547	73.7799	17.957			46.6255	22.9318	32.7253	11.0598	26.4288	37.0784	36.3139	32.8777	51.1072	12.1038	58.6755	21.9829	33.011	11.9155	33.1253	27.7793
74.2605	12.8998	41.7014	18.7402	73.784	17.1288			46.6283	22.0957	32.7254	10.2359	26.2615	36.201	36.146	32.0142	51.1112	11.1782	58.5094	21.175	33.0153	11.1033	33.1293	26.9321
74.2653	12.022	41.7117	17.9668	73.6181	16.245			46.4611	21.2032	32.5552	9.44884	26.264	35.3996	36.1483	31.1267	50.9447	10.3739	58.5135	20.3433	33.0198	10.218	32.963	26.1203
74.1	11.181	41.3821	17.0887	73.4522	15.3683			46.4638	20.3792	32.2151	8.61808	26.0962	34.6324	36.1503	30.3427	50.7782	9.5768	58.3477	19.4556	32.6836	9.48022	32.9669	25.2846
74.1048	10.3174	41.3927	16.2439	73.4562	14.5587			46.2962	19.5908	32.2153	7.73647	25.9288	33.771	35.9823	29.4958	50.6119	8.70521	58.1816	18.6657	32.6881	8.61139	32.9708	24.4547
73.9394	9.4906	41.4032	15.4062	73.4601	13.7548			45.9587	18.7479	32.0451	6.97222	26.1015	32.9542	35.9842	28.7215	50.4453	7.92303	58.0155	17.8816	32.5223	7.78093	32.6345	23.5987
73.7739	8.67095	41.2435	14.6053	73.1239	12.9278			45.7912	17.9716	31.8753	6.05856	25.934	32.1037	35.9864	27.8559	50.279	7.06789	57.8496	17.0139	32.3565	6.95908	32.6386	22.6904
73.7786	7.82872	40.9138	13.7594	72.958	12.0782			45.794	17.0828	31.535	5.26229	25.9367	31.2293	35.8187	26.9305	50.4528	6.24118	57.8537	16.2123	32.1909	6.06963	32.4722	21.9088
73.6132	7.02332	40.9242	12.9437	72.9621	11.206			45.7969	16.2012	31.5349	4.49178	25.599	30.42	35.4805	26.1363	50.2864	5.40249	57.5176	15.3877	32.1953	5.23603	32.6462	21.0735
73.4479	6.14265	40.7647	12.0845	72.6259	10.4004			45.7995	15.4138	31.3651	3.60633	25.772	29.5276	35.6525	25.3529	49.7796	4.63192	57.3516	14.5406	32.0294	4.4408	32.3099	20.2445
73.2826	5.2706	40.435	11.2636	72.63	9.54247			45.8023	14.5457	31.1949	2.80615	25.6044	28.7002	35.1444	24.506	49.6134	3.73351	57.3559	13.671	31.8637	3.58039	32.4838	19.4214
73.287	4.53918	40.2754	10.4216	72.2937	8.7511			45.4647	13.7441	31.0247	2.01458	25.4369	27.8785	35.1465	23.6699	49.6171	2.89169	57.0197	12.8678	31.5275	2.83294	32.3177	18.5763
72.9515	3.71254	40.1158	9.58815	72.1279	7.85317			45.4675	12.8902	30.8523	1.89594	25.4395	27.033	34.9784	22.8692	49.2802	2.19341	56.8537	12.0421	31.5317	2.03456	32.1515	17.7383
72.9563	2.83505	39.9564	8.68609	72.1317	7.1006			45.1298	12.1028	--	--	25.2719	26.2229	34.8105	21.9829	49.2816	2.0427	56.8579	11.1938	31.3635	1.9201	32.1551	16.9635
72.7907	2.07455	39.9667	7.9174	71.7956	6.24808			45.1326	11.2632	30.6793	1.92571	25.2745	25.3889	34.8126	21.1647	--	--	56.6921	10.2986	--	--	31.9889	16.139
72.7928	1.99591	39.6368	7.13958	71.6294	5.45622			44.7951	10.4072			25.2771	24.5606	34.6447	20.292	49.2824	2.0427	56.6963	9.46524	31.1948	1.94988	31.8226	15.3216
--	--	39.3074	6.22062	71.4632	4.67148			44.6276	9.61228			25.2797	23.7381	34.4765	19.5157			56.3603	8.61622			31.8268	14.3981
72.6245	2.02566	38.9776	5.38762	71.2975	3.73326			44.4603	8.74307			25.112	22.9511	34.3086	18.6565			56.1941	7.82754			31.4903	13.6254
		38.6476	4.638	70.9613	2.91446			44.293	7.88248			24.9446	22.0801	34.1404	17.8923			56.1982	7.01625			31.6643	12.7706
		38.4881	3.79487	70.795	2.15325			44.1254	7.1103			24.9474	21.1865	33.8025	16.9893			55.6922	6.14132			31.4979	11.9825
		38.3287	2.89057	70.4563	2.05541			43.9581	6.26616			24.6095	20.4477	33.6345	16.1515			55.5262	5.29627			31.3318	11.1207
		37.9986	2.16914	--	--			43.9609	5.40088			24.7824	19.538	33.4665	15.3209			55.3603	4.45983			31.1657	10.2676
		37.8366	2.05786	70.4576	2.05541			43.453	4.63348			24.615	18.6947	33.1283	14.527			55.3642	3.67987			30.8293	9.45282
		--	--					43.4561	3.70876			24.4472	17.9449	32.7903	13.6561			55.028	2.88964			31.0035	8.55742
		37.674	2.08764					42.9482	2.9594			24.4499	17.0854	32.452	12.8773			54.862	2.07828			31.0074	7.70038
								42.7807	2.15913			24.2826	16.178	32.2841	11.9931			54.6936	1.95604			30.6707	6.98822
								42.7811	2.00914			24.2849	15.4177	31.7759	11.1771			--	--			30.5047	6.10138
								--	--			24.1176	14.5259	31.2676	10.3696			54.6949	1.95604			30.5088	5.19503
								42.6107	2.03891			24.1202	13.6956	30.7592	9.57082							30.1722	4.43274
												23.9526	12.9022	29.911	8.68117							30.176	3.61952
												23.7849	12.1159	29.4028	7.82261							29.8396	2.80174
												23.6175	11.2563	28.2138	7.09334							29.503	2.06608
												23.45	10.4052	27.5357	6.20829							29.5045	1.92242
												23.4525	9.612	26.8572	5.41118							--	--
												23.115	8.72901	26.0088	4.57908							29.6758	1.89264
												23.1177	7.87406	25.1605	3.68503
												22.9501	7.05747	23.9716	2.93754
												22.9528	6.21974	23.4635	2.08303
												22.6152	5.3752	22.9526	2.02822
												22.4475	4.58525	--	--
												22.4503	3.70082	22.6117	2.01582
												22.1126	2.8862
												21.9448	2.12366
												21.9448	2.05205
												21.9446	2.05205

## Sheet: Fig.2-Hardness of S2
File		H(GPa)
al-2-position 1		0.673643
al-2-position 2		1.35246
al-2-position 3		0.666108
al-2-position 4		0.918672
al-2-position 5		1.19902
al-2-position 6		1.72841
al-2-position 7		2.22687
al-2-position 8		1.6599
al-2-position 9		1.02958
al-2-position 10		0.864059
al-2-position 11		1.71823
al-2-position 12		1.77064

## Sheet: Fig.2-Sample 3
al-3-position 1		al-3-position 2		al-3-position 3		al-3-position 4		al-3-position 5		al-3-position 6		al-3-position 7		al-3-position 8		al-3-position 9		al-3-position 10
Depth (nm)	Load (μN)	Depth (nm)	Load (μN)	Depth (nm)	Load (μN)	Depth (nm)	Load (μN)	Depth (nm)	Load (μN)	Depth (nm)	Load (μN)	Depth (nm)	Load (μN)	Depth (nm)	Load (μN)	Depth (nm)	Load (μN)	Depth (nm)	Load (μN)
-9.11904	-1.08356	-9.80227	-0.15704	-7.94423	-0.84152	-8.62309	-1.28374	-8.96575	-0.85377	-9.50744	-0.54585	-9.71496	-0.9998	-9.55856	-0.49807	-8.35143	-0.2666	-8.23393	-0.6038
-9.96882	-1.05766	-9.28955	-0.18474	-8.11223	-0.68908	-7.60215	-1.0307	-9.47649	-0.82638	-8.99711	-0.57252	-7.33324	-0.98331	-7.51697	-0.47985	-7.33122	-0.06734	-7.55345	-0.40918
-9.62775	-1.05574	-8.94684	-0.24438	-8.10961	-0.68908	-7.08974	-1.30572	-8.96618	-0.91584	-8.82676	-0.66512	-7.8432	-1.0182	-8.02682	-0.51603	-7.16057	-0.16036	-7.55253	-0.4721
-9.62689	-1.05574	-9.11476	-0.21456	-8.10678	-0.75042	-7.76943	-1.18644	-8.7963	-0.94566	-9.16727	-0.60548	-7.84274	-1.08027	-8.19668	-0.48621	-7.33035	-0.19368	-7.72204	-0.44228
-9.45604	-1.02392	-8.77226	-0.21235	-8.10436	-0.68908	-7.76807	-1.24815	-8.62662	-0.91341	-8.4865	-0.72475	-8.1829	-1.02063	-8.02612	-0.51603	-7.33012	-0.19368	-7.89155	-0.41247
-9.45497	-1.08556	-8.76996	-0.21235	-7.93153	-0.7189	-7.93735	-1.15662	-8.62695	-0.91341	-8.82722	-0.60234	-8.01244	-1.05045	-8.02556	-0.57874	-7.67032	-0.13405	-7.72063	-0.44228
-9.45433	-1.02392	-8.59767	-0.18026	-7.92891	-0.7189	-7.9362	-1.15662	-8.79748	-0.8836	-8.65709	-0.63215	-8.1824	-1.02063	-8.02543	-0.51603	-7.15947	-0.22349	-7.89014	-0.41247
-9.11305	-1.08356	-8.25496	-0.2399	-7.92628	-0.7189	-7.42442	-1.24608	-8.4576	-0.8811	-8.82738	-0.60234	-7.84194	-1.0182	-7.85487	-0.54585	-7.32945	-0.19368	-7.54923	-0.40918
-9.28261	-0.99204	-8.59288	-0.24217	-7.75345	-0.74872	-7.59349	-1.21626	-8.28771	-0.91092	-8.48704	-0.66197	-7.84169	-1.0182	-8.02473	-0.51603	-7.15902	-0.22349	-7.54852	-0.40918
-8.94113	-1.11339	-8.42059	-0.21008	-7.58083	-0.71712	-7.42234	-1.1843	-8.28803	-0.91092	-8.48712	-0.66197	-7.67123	-1.04802	-7.68417	-0.51289	-6.9888	-0.19018	-7.54782	-0.40918
-8.94048	-1.05168	-8.4183	-0.21008	-7.5782	-0.71712	-7.25098	-1.21412	-8.28836	-0.91092	-8.14678	-0.7216	-7.50098	-1.0157	-7.68382	-0.51289	-6.98858	-0.19018	-7.20669	-0.46881
-8.93962	-1.05168	-8.24579	-0.2399	-7.57558	-0.71712	-7.24963	-1.2759	-8.28868	-0.91092	-8.14686	-0.7216	-7.3303	-1.10766	-7.51326	-0.5427	-6.98835	-0.19018	-7.2062	-0.40582
-8.59835	-1.11132	-8.07329	-0.26972	-7.57275	-0.77854	-7.58911	-1.15448	-8.1188	-0.94073	-8.14695	-0.7216	-7.50026	-1.07784	-7.51291	-0.5427	-6.98813	-0.19018	-7.2055	-0.40582
-8.59749	-1.11132	-7.901	-0.23755	-7.40012	-0.74694	-7.24754	-1.21412	-8.11933	-0.87853	-8.14724	-0.65875	-7.67022	-1.04802	-7.34235	-0.57252	-6.8177	-0.21999	-7.03458	-0.43564
-8.42643	-1.14114	-8.06892	-0.20773	-7.05708	-0.80659	-6.90597	-1.27376	-7.77902	-1.00037	-8.14732	-0.65875	-7.32976	-1.04552	-7.68264	-0.45003	-6.47727	-0.21642	-7.3743	-0.376
-8.59599	-1.04954	-7.89642	-0.23755	-7.05467	-0.7451	-6.73483	-1.24173	-7.77956	-0.93816	-7.80698	-0.71839	-7.1593	-1.07534	-7.00145	-0.5693	-6.64725	-0.1866	-7.03317	-0.43564
-8.59492	-1.11132	-7.89412	-0.23755	-7.39225	-0.74694	-6.56326	-1.3334	-7.60968	-0.96798	-7.63685	-0.7482	-6.98884	-1.10516	-7.17131	-0.53948	-6.47682	-0.21642	-6.69205	-0.49527
-8.25386	-1.10918	-7.72162	-0.26737	-6.879	-0.83641	-7.07274	-1.24394	-7.78021	-0.93816	-8.14756	-0.65875	-7.1588	-1.07534	-7.17096	-0.53948	-6.47681	-0.15314	-6.52135	-0.46202
-8.253	-1.10918	-7.54912	-0.29719	-7.21701	-0.71528	-6.73139	-1.24173	-7.61032	-0.96798	-7.63723	-0.68528	-6.81812	-1.13498	-7.0004	-0.5693	-6.30638	-0.18296	-6.86106	-0.40239
-7.91172	-1.16882	-7.37683	-0.26495	-6.70375	-0.80474	-6.73024	-1.24173	-7.44044	-0.9978	-7.63731	-0.68528	-6.98808	-1.10516	-7.00026	-0.50638	-6.47637	-0.15314	-6.51994	-0.46202
-8.08087	-1.20078	-7.54453	-0.29719	-6.70134	-0.74318	-6.21846	-1.33119	-7.44076	-0.9978	-7.29697	-0.74491	-6.81783	-1.07277	-6.8297	-0.53619	-6.13572	-0.21277	-6.51923	-0.46202
-7.7398	-1.19864	-7.54245	-0.23513	-6.5283	-0.83456	-6.38752	-1.30137	-7.27109	-0.96534	-7.29705	-0.74491	-6.81758	-1.07277	-6.82935	-0.53619	-5.96529	-0.24259	-6.34832	-0.49184
-8.07937	-1.139	-7.19974	-0.29477	-6.69588	-0.80474	-6.04574	-1.42286	-7.1012	-0.99516	-7.29713	-0.74491	-6.64712	-1.10259	-6.65879	-0.56601	-6.30549	-0.18296	-6.1774	-0.52165
-7.9083	-1.16882	-7.19745	-0.29477	-6.52305	-0.83456	-6.38523	-1.30137	-7.27152	-1.02762	-7.29721	-0.74491	-6.47687	-1.07013	-6.48823	-0.59583	-5.79484	-0.20905	-6.17691	-0.45852
-7.90766	-1.10697	-7.19516	-0.29477	-6.52043	-0.83456	-6.38387	-1.36322	-7.10185	-0.99516	-7.29729	-0.74491	-6.47662	-1.07013	-6.48789	-0.59583	-6.13504	-0.14942	-6.176	-0.52165
-7.56638	-1.16661	-6.85245	-0.35441	-6.51801	-0.773	-6.21272	-1.33119	-7.10217	-0.99516	-7.29737	-0.74491	-6.47637	-1.07013	-6.65775	-0.56601	-5.62419	-0.23887	-6.17551	-0.45852
-7.39531	-1.19643	-7.19079	-0.23264	-6.00497	-0.80083	-6.21158	-1.33119	-6.9325	-0.96262	-6.95725	-0.74155	-6.3059	-1.09994	-6.31719	-0.56265	-5.45397	-0.20526	-6.00459	-0.48833
-7.39446	-1.19643	-7.1887	-0.17044	-6.17235	-0.83264	-6.21064	-1.26926	-6.59219	-1.08462	-6.95733	-0.74155	-6.30544	-1.16223	-6.31684	-0.56265	-5.62396	-0.17545	-5.83368	-0.51815
-7.56381	-1.16661	-6.67557	-0.3221	-5.99972	-0.80083	-6.03928	-1.29908	-6.76294	-0.99244	-6.7872	-0.77136	-6.13519	-1.12976	-5.97607	-0.62228	-5.62373	-0.17545	-5.83319	-0.45494
-7.39274	-1.19643	-6.8437	-0.23007	-6.33752	-0.74119	-5.86814	-1.2669	-6.93347	-0.96262	-6.61707	-0.80118	-5.96473	-1.15958	-6.14593	-0.59247	-5.79372	-0.14563	-5.49184	-0.57778
-7.39189	-1.19643	-6.50078	-0.35192	-5.82426	-0.83065	-5.8672	-1.20484	-6.76359	-0.99244	-6.95757	-0.74155	-6.1349	-1.06741	-5.97537	-0.62228	-5.45329	-0.14177	-6.00177	-0.48833
-7.22082	-1.22625	-6.66891	-0.25989	-5.99185	-0.80083	-5.52563	-1.26448	-6.42349	-1.05208	-6.61745	-0.73811	-5.79401	-1.1894	-5.97502	-0.62228	-5.28286	-0.17158	-5.49065	-0.51457
-7.21997	-1.22625	-6.4964	-0.28971	-5.64902	-0.79876	-5.52449	-1.26448	-6.42403	-0.98965	-6.44732	-0.76793	-5.79398	-1.12705	-5.97467	-0.62228	-4.94221	-0.23121	-5.66016	-0.48475
-7.04911	-1.19415	-6.3239	-0.31953	-5.47597	-0.89029	-5.35313	-1.29429	-6.25414	-1.01947	-6.27719	-0.79774	-5.79372	-1.12705	-5.6339	-0.68191	-5.28241	-0.17158	-5.31903	-0.54439
-6.87825	-1.16197	-6.32161	-0.31953	-5.64377	-0.79876	-5.35219	-1.23215	-6.25447	-1.01947	-6.44748	-0.76793	-5.45305	-1.18668	-5.63377	-0.61885	-5.2824	-0.10802	-5.14833	-0.51092
-6.70719	-1.19179	-6.31932	-0.31953	-5.64115	-0.79876	-5.35083	-1.29429	-6.425	-0.98965	-6.44756	-0.76793	-5.62301	-1.15686	-5.46321	-0.64866	-4.77155	-0.19746	-5.31784	-0.48111
-6.87633	-1.22397	-6.14682	-0.34935	-5.46831	-0.82859	-5.3499	-1.23215	-6.08512	-0.98679	-6.27764	-0.7346	-5.28234	-1.2165	-5.63307	-0.61885	-4.60112	-0.22728	-5.14671	-0.5742
-6.36484	-1.31343	-5.80431	-0.34671	-5.46569	-0.82859	-5.17854	-1.26197	-6.08544	-0.98679	-5.76688	-0.88719	-5.4523	-1.18668	-5.2923	-0.67848	-4.7711	-0.19746	-5.14622	-0.51092
-6.5342	-1.28361	-5.97223	-0.31689	-5.12286	-0.82645	-5.17739	-1.26197	-5.91556	-1.01661	-6.10738	-0.82756	-5.11184	-1.18389	-5.63237	-0.61885	-4.60067	-0.22728	-5.14551	-0.51092
-6.53334	-1.28361	-5.96994	-0.31689	-4.94982	-0.91805	-4.83604	-1.2594	-5.91609	-0.95404	-5.76704	-0.88719	-4.94116	-1.27614	-5.29182	-0.61534	-4.43045	-0.19345	-4.8046	-0.5072
-6.70291	-1.19179	-5.79744	-0.34671	-5.11761	-0.82645	-5.00489	-1.29179	-5.74621	-0.98386	-5.93755	-0.79423	-4.94091	-1.27614	-5.12104	-0.70829	-4.43023	-0.19345	-4.80368	-0.57055
-6.19142	-1.28125	-5.79515	-0.34671	-4.94478	-0.85627	-4.83374	-1.2594	-5.57632	-1.01368	-5.93763	-0.79423	-5.11087	-1.24632	-5.12091	-0.64516	-4.60021	-0.16364	-4.80319	-0.5072
-6.5312	-1.15954	-5.45243	-0.40635	-5.28258	-0.79663	-5.00281	-1.22958	-5.74686	-0.98386	-5.7675	-0.82405	-5.11062	-1.24632	-4.95035	-0.67497	-4.25957	-0.22327	-4.80227	-0.57055
-5.84929	-1.34089	-5.45014	-0.40635	-4.93974	-0.79442	-4.49124	-1.25675	-5.57718	-0.95104	-5.59737	-0.85386	-4.94016	-1.27614	-4.95	-0.67497	-4.25935	-0.22327	-4.63158	-0.53702
-6.01885	-1.249	-5.61827	-0.31419	-4.59649	-0.91591	-4.6603	-1.22693	-5.23687	-1.07332	-5.59745	-0.85386	-4.93991	-1.27614	-4.94965	-0.67497	-4.08913	-0.18938	-4.63066	-0.60037
-6.018	-1.249	-5.27556	-0.37382	-4.76429	-0.82424	-4.65916	-1.22693	-5.40741	-1.0435	-5.42732	-0.88368	-4.76944	-1.30596	-4.60888	-0.7346	-4.08869	-0.25308	-4.28975	-0.59664
-6.01714	-1.249	-5.27327	-0.37382	-4.59145	-0.85406	-4.65822	-1.16458	-5.06731	-1.10313	-5.25741	-0.85028	-4.59919	-1.27335	-4.60853	-0.7346	-4.08868	-0.18938	-4.28904	-0.59664
-5.84607	-1.27882	-5.44119	-0.344	-4.58883	-0.85406	-4.65707	-1.16458	-5.23806	-1.01068	-5.4277	-0.82047	-4.93936	-1.21371	-4.60839	-0.67139	-4.08846	-0.18938	-4.11834	-0.56303
-5.84522	-1.27882	-4.92826	-0.43346	-4.58621	-0.85406	-4.14551	-1.19161	-5.06817	-1.04049	-5.25757	-0.85028	-4.25848	-1.27048	-4.60804	-0.67139	-3.91824	-0.15541	-4.28785	-0.53322
-5.50415	-1.27632	-4.92597	-0.43346	-4.41337	-0.88388	-4.14436	-1.19161	-5.06828	-1.10313	-4.91723	-0.90991	-4.08781	-1.3628	-4.43748	-0.70121	-4.08823	-0.1256	-4.11693	-0.56303
-5.67351	-1.2465	-4.92389	-0.37104	-4.07054	-0.8816	-4.14321	-1.19161	-4.7284	-1.10013	-5.08752	-0.8801	-4.08756	-1.3628	-4.43714	-0.70121	-3.57737	-0.21504	-3.94623	-0.52935
-5.50223	-1.33846	-4.9216	-0.37104	-4.06771	-0.94352	-3.97207	-1.15893	-4.89894	-1.07031	-4.91739	-0.90991	-4.25752	-1.33298	-4.26658	-0.73102	-3.57737	-0.15119	-3.7751	-0.62266
-5.6718	-1.2465	-4.57868	-0.4931	-4.06508	-0.94352	-3.8005	-1.25124	-4.89926	-1.07031	-4.40684	-0.99936	-4.25727	-1.33298	-4.09623	-0.69756	-3.57714	-0.15119	-3.7744	-0.62266
-5.33073	-1.24393	-4.7466	-0.46328	-4.23288	-0.85178	-3.96977	-1.15893	-4.89959	-1.07031	-4.91734	-0.97313	-4.0868	-1.3628	-4.26609	-0.66774	-3.57692	-0.15119	-3.77391	-0.55917
-5.32988	-1.24393	-4.57409	-0.4931	-4.23026	-0.85178	-3.79842	-1.18875	-4.90012	-1.0076	-4.74742	-0.93973	-4.08676	-1.3003	-4.09553	-0.69756	-3.40649	-0.181	-3.77321	-0.55917
-5.15881	-1.27374	-4.4018	-0.4605	-3.71721	-0.87924	-3.62727	-1.15599	-4.56003	-1.06723	-4.57751	-0.90626	-3.9163	-1.33012	-3.92519	-0.66402	-3.23627	-0.14689	-3.60251	-0.52542
-5.15795	-1.27374	-4.56972	-0.43068	-3.37417	-0.93888	-3.62613	-1.15599	-4.39014	-1.09705	-4.57759	-0.90626	-3.91605	-1.33012	-3.92462	-0.72737	-3.06562	-0.24063	-3.60159	-0.58898
-4.98689	-1.30356	-4.39722	-0.4605	-3.71176	-0.94124	-3.45456	-1.24838	-4.39068	-1.03427	-4.23725	-0.96589	-3.7458	-1.29737	-3.75406	-0.75719	-3.06561	-0.1767	-3.09047	-0.61486
-4.81603	-1.2711	-4.39493	-0.4605	-3.53892	-0.97106	-3.2832	-1.2782	-4.05058	-1.0939	-4.23712	-1.02918	-3.74555	-1.29737	-3.58372	-0.72364	-3.06517	-0.24063	-3.43018	-0.55523
-4.98517	-1.30356	-4.39264	-0.4605	-3.70651	-0.94124	-3.45247	-1.18581	-4.22112	-1.06408	-4.57783	-0.90626	-3.57509	-1.32718	-3.41316	-0.75346	-3.06517	-0.1767	-3.25927	-0.58504
-4.81432	-1.2711	-4.22035	-0.42782	-3.36347	-1.00088	-3.45133	-1.18581	-4.22144	-1.06408	-4.06728	-0.9957	-3.57484	-1.32718	-3.58302	-0.72364	-2.89495	-0.14252	-3.25856	-0.58504
-4.64325	-1.30092	-4.04784	-0.45764	-3.36084	-1.00088	-2.93976	-1.21262	-4.05177	-1.03104	-4.06715	-1.05899	-3.40459	-1.29436	-3.58267	-0.72364	-2.89473	-0.14252	-3.25786	-0.58504
-4.6424	-1.30092	-4.04555	-0.45764	-3.35843	-0.93888	-3.10882	-1.18281	-3.88188	-1.06086	-4.06745	-0.9957	-3.57476	-1.20183	-3.2419	-0.78328	-2.72451	-0.10827	-2.91695	-0.58103
-4.64154	-1.30092	-3.87326	-0.4249	-3.18581	-0.90664	-3.10768	-1.18281	-3.88221	-1.06086	-3.7271	-1.05533	-3.23409	-1.26146	-3.24155	-0.78328	-2.38365	-0.23196	-3.08646	-0.55122
-4.47069	-1.26838	-3.87076	-0.48746	-3.18319	-0.90664	-2.93653	-1.14991	-3.71253	-1.02775	-3.72719	-1.05533	-3.23384	-1.26146	-3.24142	-0.71985	-2.55385	-0.13808	-2.74533	-0.61085
-4.29962	-1.2982	-3.69847	-0.45471	-3.18035	-0.9687	-2.93539	-1.14991	-3.88307	-0.99793	-4.06769	-0.9957	-3.06338	-1.29128	-3.07086	-0.74966	-2.55363	-0.13808	-2.74463	-0.61085
-4.29855	-1.36056	-3.52596	-0.48453	-3.00773	-0.93646	-2.76403	-1.17973	-3.88339	-0.99793	-3.72735	-1.05533	-3.06312	-1.29128	-3.07073	-0.68617	-2.3832	-0.16789	-2.91413	-0.58103
-4.29791	-1.2982	-3.69388	-0.45471	-2.83511	-0.90414	-2.59267	-1.20955	-3.54351	-0.99457	-3.72764	-0.99198	-3.06309	-1.22849	-2.89995	-0.77948	-2.21298	-0.13357	-2.40301	-0.60676
-4.12705	-1.26559	-3.35117	-0.51435	-2.66206	-0.9961	-2.59174	-1.14676	-3.54384	-0.99457	-3.55752	-1.02179	-3.06283	-1.22849	-2.72961	-0.74579	-2.04255	-0.16338	-2.57252	-0.57695
-4.12599	-1.32802	-3.51909	-0.48453	-2.65965	-0.93396	-2.59059	-1.14676	-3.37395	-1.02438	-3.38739	-1.05161	-2.55216	-1.25509	-2.72926	-0.74579	-2.21231	-0.19771	-2.4016	-0.60676
-3.95513	-1.29541	-3.3468	-0.45171	-2.65682	-0.9961	-2.41923	-1.17658	-3.37449	-0.96131	-3.21747	-1.01799	-2.72212	-1.22527	-2.5587	-0.77561	-2.38252	-0.10376	-2.4009	-0.60676
-3.78407	-1.32523	-3.34451	-0.45171	-2.65462	-0.87175	-2.75872	-1.05409	-3.54502	-0.9315	-3.04713	-1.11124	-2.55166	-1.25509	-2.72856	-0.74579	-2.2123	-0.06936	-2.40041	-0.54298
-3.78321	-1.32523	-3.0018	-0.51135	-2.48157	-0.96378	-2.24694	-1.14354	-3.20493	-0.99113	-3.38763	-1.05161	-2.3812	-1.2849	-2.72843	-0.68222	-2.04209	-0.0349	-2.2295	-0.57279
-3.78235	-1.32523	-3.16971	-0.48153	-2.30895	-0.93139	-2.24601	-1.08061	-3.03525	-0.95781	-3.0475	-1.04781	-2.55116	-1.25509	-2.38766	-0.74185	-1.87187	-0.000357	-2.0588	-0.53875
-3.44129	-1.32237	-2.99742	-0.44864	-2.30633	-0.93139	-2.41529	-0.98779	-3.03579	-0.89459	-2.87737	-1.07762	-2.38091	-1.22197	-2.38731	-0.74185	-1.87187	0.06406	-2.22831	-0.50894
-3.61064	-1.29255	-2.82492	-0.47846	-2.30391	-0.86911	-2.07372	-1.04743	-3.03612	-0.89459	-2.87745	-1.07762	-2.38066	-1.22197	-2.38717	-0.67821	-1.87165	0.06406	-1.88718	-0.56857
-3.60958	-1.35505	-2.65242	-0.50828	-2.30129	-0.86911	-1.90258	-1.01417	-2.69602	-0.95422	-3.04753	-1.11124	-2.21041	-1.18879	-2.21661	-0.70803	-1.531	0.00444	-1.88669	-0.50464
-3.43851	-1.38487	-2.82034	-0.47846	-2.12867	-0.83657	-1.90143	-1.01417	-2.86677	-0.86112	-3.04804	-0.98431	-2.38037	-1.15897	-2.5569	-0.58469	-1.36079	0.03913	-1.71556	-0.59838
-3.26766	-1.35218	-2.81805	-0.47846	-1.95584	-0.86639	-1.9005	-0.95103	-2.8671	-0.86112	-3.04813	-0.98431	-2.21012	-1.12572	-2.21613	-0.64431	-1.19035	0.00932	-1.88528	-0.50464
-3.0968	-1.31943	-2.30534	-0.50513	-1.95321	-0.86639	-1.72914	-0.98085	-2.69743	-0.82758	-2.708	-0.98036	-2.03966	-1.15553	-1.70515	-0.73375	-1.19013	0.00932	-1.71459	-0.47046
-2.92574	-1.34925	-2.47326	-0.47532	-1.9508	-0.80397	-1.72821	-0.91764	-2.52776	-0.79397	-2.36788	-0.97635	-2.03963	-1.09239	-1.70459	-0.79747	-1.18991	0.00932	-1.71388	-0.47046
-3.2653	-1.28961	-2.64118	-0.4455	-1.94818	-0.80397	-1.72728	-0.85435	-2.35765	-0.88721	-2.36774	-1.03999	-1.69917	-1.08881	-2.04509	-0.61034	-1.18946	-0.05518	-1.54319	-0.4362
-3.26466	-1.22697	-2.12846	-0.4721	-1.94598	-0.67891	-1.72613	-0.85435	-2.35819	-0.82379	-2.70846	-0.91672	-1.86913	-1.05899	-1.70432	-0.66997	-1.18946	0.00932	-1.37227	-0.46602
-2.75317	-1.31642	-2.46659	-0.41247	-1.60294	-0.73855	-1.55499	-0.82081	-2.52895	-0.73047	-2.53833	-0.94654	-1.86909	-0.9957	-1.70397	-0.66997	-1.18945	0.07388	-1.37156	-0.46602
-2.92252	-1.28661	-1.95367	-0.50192	-1.77074	-0.64609	-1.55406	-0.75739	-2.18885	-0.7901	-2.19842	-0.87866	-1.69884	-0.96216	-1.53341	-0.69978	-1.01924	0.10871	-1.54129	-0.37206
-2.58125	-1.34624	-1.95117	-0.56477	-1.59812	-0.6132	-1.38291	-0.7237	-2.3596	-0.69672	-2.19829	-0.94245	-1.52838	-0.99198	-1.36307	-0.66574	-1.01902	0.10871	-1.20038	-0.36748
-2.41039	-1.31334	-2.28951	-0.44228	-1.4255	-0.58024	-1.38198	-0.66014	-2.18993	-0.66289	-2.19837	-0.94245	-1.52835	-0.92855	-1.36272	-0.66574	-0.8488	0.1436	-1.37011	-0.27338
-2.57975	-1.28353	-1.9468	-0.50192	-1.25266	-0.61005	-1.38084	-0.66014	-2.02026	-0.62899	-2.02846	-0.90847	-1.52831	-0.86505	-1.19216	-0.69555	-0.8488	0.20838	-1.3694	-0.27338
-2.40868	-1.31334	-1.94472	-0.439	-1.42047	-0.51739	-1.38012	-0.53278	-1.85037	-0.65881	-1.85854	-0.87443	-1.35806	-0.83129	-1.3618	-0.72959	-1.01901	0.30304	-1.19893	-0.17442
-2.57804	-1.28353	-1.94264	-0.376	-1.41784	-0.51739	-1.20898	-0.49882	-2.02113	-0.56521	-2.02884	-0.84462	-1.35781	-0.83129	-1.19168	-0.63163	-0.67836	0.24342	-1.02823	-0.13974
-2.23697	-1.28038	-1.77014	-0.40582	-1.24522	-0.48428	-1.20805	-0.43496	-1.85124	-0.59503	-2.19935	-0.75088	-1.35778	-0.76765	-1.53175	-0.572	-0.84857	0.33815	-1.02753	-0.13974
-1.8957	-1.34001	-1.59785	-0.37257	-1.0726	-0.4511	-0.86692	-0.36667	-1.852	-0.46725	-1.6888	-0.84031	-1.35774	-0.70394	-1.36163	-0.47375	-0.50837	0.40859	-0.85683	-0.10498
-2.23526	-1.28038	-1.42535	-0.40239	-1.0702	-0.38804	-1.03598	-0.33686	-1.68211	-0.49706	-1.8593	-0.7465	-1.1875	-0.66997	-1.02107	-0.46923	-0.50837	0.47372	-0.85613	-0.10498
-2.23441	-1.28038	-1.42284	-0.46545	-1.06779	-0.32491	-0.86506	-0.23847	-1.51244	-0.46287	-1.51918	-0.74205	-1.01725	-0.63593	-1.02072	-0.46923	-0.67858	0.56873	-0.85586	0.02437
-2.06355	-1.24734	-1.59098	-0.37257	-1.23559	-0.23188	-0.86413	-0.17426	-1.51299	-0.39881	-1.68969	-0.6481	-1.01722	-0.572	-1.02059	-0.40502	-0.33815	0.5744	-0.85538	0.08914
-1.89249	-1.27715	-1.24826	-0.43221	-0.89297	-0.16489	-0.8632	-0.10998	-1.51353	-0.33467	-1.34935	-0.70772	-1.0174	-0.44393	-0.85003	-0.43483	-0.33815	0.63974	-0.68468	0.12419
-1.72142	-1.30697	-1.24619	-0.36907	-0.89057	-0.10147	-0.86228	-0.04562	-1.51407	-0.27046	-1.51986	-0.6137	-0.84716	-0.40961	-0.8499	-0.37055	-0.33815	0.70516	-0.85463	0.28391
-1.89078	-1.27715	-1.24411	-0.30586	-0.71795	-0.06779	-0.69136	0.05348	-1.17398	-0.33008	-1.34995	-0.57922	-0.67692	-0.37521	-0.67956	-0.336	-0.50858	0.86602	-0.68394	0.31916
-1.71992	-1.24404	-1.24203	-0.24259	-0.71576	0.0594	-0.69065	0.18268	-1.34473	-0.23599	-1.35025	-0.51487	-0.67666	-0.37521	-0.67943	-0.27158	-0.3386	0.96755	-0.68367	0.4495
-1.71928	-1.18104	-1.23974	-0.24259	-0.88356	0.15292	-0.3493	0.18777	-1.17506	-0.20145	-1.35033	-0.51487	-0.84706	-0.21676	-0.6793	-0.20708	-0.16839	1.00352	-0.5132	0.55032
-1.71842	-1.18104	-1.06745	-0.20905	-0.71116	0.25073	-0.6888	0.31216	-1.17561	-0.13702	-1.35085	-0.38594	-0.67682	-0.18215	-0.50896	-0.17232	-0.33882	1.16508	-0.68293	0.64555
-1.54757	-1.14779	-1.06538	-0.14563	-0.53855	0.28484	-0.5181	0.47711	-1.17637	-0.00796	-1.35115	-0.32137	-0.67679	-0.11765	-0.67926	-0.01317	-0.33927	1.36326	-0.51246	0.74679
-1.54693	-1.08464	-0.72266	-0.20526	-0.53636	0.41289	-0.5174	0.60731	-1.17691	0.05668	-1.18124	-0.28654	-0.67697	0.01155	-0.50892	0.02181	-0.16929	1.46593	-0.68241	0.90794
-1.54629	-1.02143	-1.23144	0.01124	-0.70417	0.50683	-0.34626	0.64271	-1.00725	0.09157	-1.01155	-0.18686	-0.50695	0.11123	-0.50902	0.15158	0.00092	1.50247	-0.34196	1.04587
-1.37544	-0.98796	-0.88894	0.01524	-0.36156	0.57568	-0.17535	0.74352	-0.8378	0.19139	-1.01185	-0.12201	-0.50714	0.24101	-0.33868	0.18677	0.000691	1.63537	-0.34148	1.11185
-1.20437	-1.01778	-0.88686	0.07895	-0.52958	0.73425	-0.17464	0.87443	-1.00878	0.35112	-0.67195	-0.0517	-0.3369	0.27619	-0.50898	0.34678	0.000462	1.76855	-0.34145	1.31025
-1.20373	-0.95442	-0.88501	0.20657	-0.18698	0.80368	-0.17394	1.00562	-0.83911	0.38637	-0.84225	-0.02189	-0.33709	0.40639	-0.33886	0.44745	4e-06	1.96886	-0.3412	1.44286
-1.20309	-0.89099	-0.54251	0.21086	-0.52522	0.99262	-0.17324	1.1371	-0.83966	0.45151	-0.84277	0.10831	-0.5075	0.56668	-0.33874	0.5128	--	--	-0.34095	1.57576
-1.03224	-0.85731	-0.71086	0.36872	-0.18283	1.12753	-0.17254	1.26886	-0.84065	0.64734	-1.01351	0.26861	-0.50769	0.69745	-0.33883	0.64372	0	2.03577	-0.34092	1.77565
-1.03139	-0.85731	-0.53858	0.40304	-0.35086	1.28738	-0.17185	1.4009	-0.67099	0.68295	-0.67339	0.27435	-0.3379	0.86433	-0.16872	0.74511	-0.34088	2.29653	-0.000477	1.91657
-1.03075	-0.79374	-0.3663	0.43743	-0.34868	1.4177	-0.00116	1.5697	-0.67175	0.814	-0.67369	0.33977	-0.16788	0.96601	-0.16882	0.87659	0.17043	2.07295	0	1.98355
-1.03032	-0.66639	-0.53465	0.59586	-0.00608	1.4887	-0.000468	1.70245	-0.50209	0.84983	-0.50401	0.44103	0.00191	1.13396	-0.16892	1.00836	0.1702	2.20713	--	--
-0.85947	-0.63242	-0.36237	0.63047	-0.17434	1.71495	--	--	-0.33265	0.95151	-0.50453	0.57237	-0.1685	1.29595	-0.16924	1.20654	0.3381	2.9204	-0.50993	2.07295
-0.85883	-0.56857	-0.19031	0.7297	-0.00195	1.81646	0	1.90212	-0.16322	1.05346	-0.50506	0.704	-0.50912	1.48803	-0.16912	1.27274	0.67573	3.75008	0.17162	1.95375
-0.68798	-0.53445	-0.35844	0.82414	--	--	0.00137	1.83549	-0.33397	1.14926	-0.33516	0.74012	-0.16935	1.69423	0.000541	1.50846	0.84309	4.62157	0.17164	2.15513
-0.68735	-0.47046	-0.1866	0.98864	0	2.01397	0.00207	1.96882	-0.50496	1.31125	-0.5059	0.90198	-0.16978	1.89433	0.000438	1.64165	1.18087	5.40462	0.34003	2.8692
-0.51672	-0.37206	-0.35474	1.08337	0.34282	2.02034	0.00276	2.10243	-0.16531	1.38412	-0.16601	0.97471	--	--	-0.1701	1.87177	1.34817	6.29923	0.50791	3.72961
-0.68629	-0.27804	-0.35289	1.21341	0.00525	2.01397	0.17137	2.88025	-0.16609	1.51688	-0.33675	1.13714	0	2.06527	--	--	1.68587	7.10362	0.67576	4.60203
-0.51566	-0.17922	-0.18083	1.31392	0.0072	2.21212	0.50992	3.70714	-0.16687	1.64992	-0.16707	1.24024	0.17001	2.16965	0	1.97587	1.85358	7.8748	0.6736	5.44551
-0.85566	0.00932	0.16144	1.38492	0.34775	2.88455	0.50849	4.46662	0.00234	1.82022	-0.16761	1.37344	4.7e-05	2.19945	-0.000335	2.17725	1.8508	8.75837	1.01182	6.23966
-0.51483	0.0789	-0.17714	1.57542	0.34739	3.76077	0.50679	5.30495	0.00156	1.95398	-0.33835	1.53672	-0.17014	2.29645	-0.000215	2.24452	2.18841	9.59265	1.1798	7.07384
-0.3442	0.17857	-0.0053	1.74249	0.34723	4.58024	0.84498	6.23637	0.17099	2.05822	0.0013	1.67786	0.16823	2.91273	0.17035	2.21472	2.52598	10.4372	1.51795	7.88849
-0.34356	0.24342	-0.00368	1.94	0.51701	5.44976	0.84345	7.02479	--	--	0.000767	1.81205	0.16546	3.80201	-0.00182	2.92112	2.86377	11.2154	1.51565	8.77293
-0.34337	0.4384	0.16837	2.04223	0.68698	6.26077	1.01185	7.86491	0	2.22234	--	--	0.3331	4.60375	0.33593	3.75174	2.69091	12.0915	1.68378	9.56288
-0.34274	0.50353	--	--	0.85692	7.08202	1.18047	8.64153	0.16966	2.25981	0	2.01387	0.33072	5.37498	0.33345	4.58414	3.19886	12.8571	2.02208	10.3317
-0.34255	0.69936	0	2.20435	1.02683	7.91351	1.3488	9.50128	0.16956	2.19254	0.51055	1.92447	0.49805	6.26774	0.5009	5.46767	3.36635	13.6909	2.01968	11.2451
-0.17192	0.80046	0.17183	2.37355	1.02649	8.78502	1.17693	10.3554	0.16878	2.32715	0.17028	1.91673	0.49562	7.05774	0.6688	6.22008	3.53382	14.5333	2.18772	12.0617
-0.00131	0.90185	0.17434	2.30715	1.02636	9.59289	1.3452	11.2348	0.3359	3.11098	-0.000702	2.14877	0.66311	7.89959	0.66622	7.08319	3.70099	15.4648	2.18552	12.9166
-0.17133	1.12897	0.0062	2.40335	1.19617	10.4542	1.51369	12.0474	0.84317	3.91458	0.33687	2.90455	0.83058	8.75168	1.00402	7.89699	4.03888	16.2141	2.3535	13.7504
-0.17092	1.26088	0.34664	3.01173	1.36619	11.2503	1.68216	12.8686	1.00998	4.78979	0.67416	3.73984	0.99801	9.61401	1.17157	8.7508	4.37619	17.1347	2.69166	14.563
-0.17074	1.45926	0.17573	3.92051	1.19577	12.1145	1.85086	13.6199	1.17675	5.67702	0.67124	4.57655	0.9957	10.3652	1.33909	9.61486	4.54382	17.9294	2.85958	15.414
-0.17056	1.65829	0.51565	4.68296	1.53594	12.8981	1.84879	14.5666	1.68414	6.44482	0.66828	5.42349	1.16333	11.1701	1.33663	10.4432	4.5415	18.6776	2.85753	16.2221
-0.000175	1.82815	0.85506	5.59536	1.53567	13.7497	2.18765	15.3039	1.68111	7.23954	1.00546	6.293	1.16045	12.0903	1.33439	11.2037	4.87873	19.6246	2.85519	17.1193
--	--	1.02469	6.4098	1.70558	14.5802	2.18579	16.1885	1.84777	8.16006	1.17288	7.05875	1.32801	12.9131	1.50208	12.0187	5.04628	20.4414	3.0233	17.9126
0	2.02846	0.85387	7.29403	1.87546	15.4193	2.18417	17.0001	2.52527	8.92884	1.51024	7.87687	1.15513	13.804	1.66947	12.9203	5.38402	21.2356	3.19111	18.7965
0.17084	2.06557	1.19389	8.02671	2.04531	16.2671	2.18254	17.8189	2.6921	9.79719	1.50714	8.76477	1.3229	14.5646	1.83709	13.7533	5.38132	22.0964	3.35918	19.6047
0.17147	2.13255	1.19321	8.90079	2.21541	17.0425	2.52101	18.6682	2.85915	10.5997	1.84442	9.60337	1.49038	15.4124	1.83448	14.6246	5.88922	22.8752	3.69743	20.3904
0.00189	2.22941	1.3627	9.75532	2.21499	17.9364	2.51932	19.5019	3.19639	11.381	2.01172	10.4059	1.6581	16.188	2.00205	15.4748	6.22689	23.6908	3.69524	21.2426
0.17043	2.94189	1.53242	10.5452	2.38503	18.7267	2.68782	20.313	3.36313	12.2784	2.00878	11.2468	1.65531	17.082	2.16986	16.2525	6.22411	24.5729	3.86323	22.0722
0.33871	3.73166	1.53189	11.3734	2.21435	19.6667	2.68609	21.1609	3.35988	13.1373	2.34624	12.0368	1.82299	17.8724	2.33765	17.0373	6.22131	25.4621	4.20141	22.8793
0.33674	4.56147	1.70155	12.1804	2.38463	20.3882	3.02475	21.9565	3.86724	13.9155	2.51345	12.8651	1.82014	18.7829	2.33493	17.9415	6.55922	26.2091	4.19914	23.7528
0.50471	5.44218	1.70097	13.0258	2.38439	21.2296	3.02296	22.8186	4.03414	14.7618	2.51042	13.7318	1.81756	19.618	2.50267	18.7412	6.72658	27.0821	4.36706	24.6038
0.50292	6.22199	1.70036	13.8798	2.72455	22.0187	3.02116	23.6879	4.37123	15.587	2.84751	14.6277	1.98544	20.3459	2.67038	19.5481	6.89423	27.871	4.53526	25.3728
0.67106	7.05273	2.04013	14.6829	2.72397	22.9603	3.18953	24.5345	4.87822	16.4727	3.01491	15.4018	2.32294	21.2204	2.66757	20.4765	7.06155	28.7576	4.87335	26.2076
0.66895	7.92347	2.20967	15.5244	2.72396	23.737	3.35819	25.2996	4.7049	17.3227	3.35221	16.2349	2.32028	22.0769	3.00574	21.1831	7.39937	29.5289	4.87099	27.1088
0.66706	8.73065	2.37919	16.3745	2.89383	24.5772	3.35631	26.1894	5.21211	18.144	3.34935	17.0538	2.31789	22.8537	3.00317	22.041	7.39643	30.4587	5.37923	27.9282
0.8351	9.59125	2.37846	17.2629	2.89377	25.3661	3.69483	27.027	5.37916	18.9495	3.6866	17.9032	2.31488	23.8111	3.00058	22.906	7.73421	31.2422	5.20693	28.7815
1.00336	10.3866	2.54819	18.0483	3.0636	26.2198	3.69321	27.8404	5.71639	19.7324	4.02381	18.7614	2.31245	24.6008	3.16818	23.7484	7.90176	32.0612	5.37502	29.5812
1.00113	11.2966	2.5474	18.9531	3.23341	27.0805	3.69126	28.7508	5.88339	20.5521	4.36129	19.5435	2.48021	25.3665	3.50596	24.5683	8.06928	32.8859	5.71331	30.357
0.99911	12.1398	2.71708	19.7535	3.23329	27.888	3.68991	29.4843	6.05007	21.465	4.18811	20.422	2.47743	26.2571	3.50359	25.3657	8.23679	33.7164	5.88104	31.2621
1.16728	12.9618	2.71653	20.5906	3.40305	28.7623	4.02866	30.2556	6.21702	22.2996	4.35534	21.2481	2.64484	27.1251	3.50091	26.2584	8.40395	34.6492	5.87887	32.1094
1.33569	13.7138	2.88616	21.4051	3.57278	29.6437	4.02664	31.1853	6.55415	23.1117	4.52253	22.0813	2.64232	27.9391	3.4982	27.1583	8.74196	35.365	6.21709	32.9032
1.3336	14.582	3.05577	22.2268	3.5726	30.4697	4.02492	32.0281	7.06147	23.9012	5.03012	22.8623	2.98021	28.6995	3.83619	27.9148	8.7392	36.2425	6.38508	33.7324
1.67189	15.3993	3.22535	23.0556	3.57271	31.2088	4.1934	32.8469	7.05813	24.7869	5.02706	23.7395	2.97765	29.525	3.83375	28.7365	9.07684	37.0664	6.55306	34.5673
1.4998	16.2335	3.22499	23.8343	3.74238	32.1094	4.36185	33.6716	7.5654	25.5906	5.19418	24.594	2.97476	30.449	3.83097	29.6563	9.24425	37.9257	6.72101	35.408
1.66783	17.097	3.39453	24.6766	3.74213	32.9527	4.53028	34.502	7.73223	26.4608	5.36158	25.3663	3.14238	31.257	3.99869	30.4605	9.41198	38.6911	6.88895	36.2545
1.6659	17.9164	3.22392	25.4971	3.74187	33.8018	4.52881	35.2713	8.23945	27.2788	5.69887	26.2047	3.13976	32.1004	4.1664	31.2704	9.74957	39.5317	6.88699	37.0382
1.66367	18.826	3.56332	26.4122	4.082	34.5973	4.69688	36.2097	8.40623	28.1633	5.69571	27.1096	3.30733	32.9199	4.33408	32.0862	9.74671	40.4373	7.05489	37.8955
1.83218	19.5469	3.73309	27.1861	3.91182	35.3916	4.52516	37.0189	8.91371	28.9031	6.20316	27.9326	3.47489	33.7452	4.33154	32.9373	10.0843	41.2895	7.56319	38.6994
2.00039	20.358	3.73263	27.9956	4.4218	36.2649	4.69386	37.7734	9.08045	29.8011	6.37048	28.7298	3.47221	34.6059	4.66939	33.7349	10.4221	42.0452	7.73105	39.5683
1.99807	21.2911	3.90205	28.872	4.42179	37.0399	4.69198	38.661	9.58789	30.5531	6.36756	29.5625	3.63973	35.4427	4.83702	34.5679	10.5894	42.9378	7.89889	40.443
1.99631	22.0609	4.07145	29.7555	4.42143	37.9171	4.69009	39.5543	9.58437	31.4943	6.53484	30.3713	3.80722	36.2853	5.00463	35.4067	10.757	43.7328	8.06705	41.222
2.16444	22.8933	4.07093	30.5835	4.42105	38.8001	4.85874	40.3236	10.0918	32.2585	6.87199	31.2503	3.80482	37.0655	5.00234	36.1835	10.7545	44.562	8.06499	42.0352
2.33256	23.7328	4.07038	31.4172	4.59119	39.5602	5.19723	41.1685	10.2587	33.0878	7.03923	32.0712	3.97228	37.9189	5.16991	37.0331	11.0919	45.4411	8.23278	42.9259
2.50064	24.5794	4.24003	32.227	4.59078	40.454	5.02541	42.0067	10.5956	33.9896	7.54654	32.9341	3.96985	38.7088	5.16725	37.9182	11.5999	46.1912	8.5711	43.6896
2.49879	25.3742	4.40966	33.0426	4.9311	41.1942	5.36422	42.7606	10.9327	34.8014	7.54385	33.7007	3.96706	39.6027	5.50499	38.7497	11.7671	47.1107	8.56899	44.517
2.49693	26.1747	4.40906	33.8936	4.93065	42.0989	5.36224	43.6808	11.2701	35.5213	7.88091	34.6061	4.1348	40.3726	5.50263	39.5464	11.935	47.8233	8.73672	45.4237
2.49443	27.161	4.57865	34.7208	4.93052	42.9079	5.5308	44.474	11.4367	36.472	7.70798	35.4126	4.13198	41.2775	5.49991	40.4481	11.9323	48.6759	8.90479	46.2313
2.49252	27.9743	4.57801	35.5833	4.93038	43.7216	5.52913	45.3014	11.7738	37.3011	8.04533	36.2327	4.29969	42.057	5.66773	41.2249	12.4399	49.5517	9.07284	47.0433
2.6608	28.7637	4.91809	36.2955	5.27029	44.5831	5.52745	46.1333	12.1112	38.0364	8.38266	37.0586	4.46738	42.8411	5.83518	42.1078	12.4372	50.4139	9.24088	47.8599
2.48865	29.6182	4.74721	37.1986	5.27012	45.4063	5.6956	47.045	12.278	38.9061	8.37955	37.9496	4.63471	43.7323	6.00297	42.8942	12.4345	51.2806	9.57875	48.7582
2.8271	30.3895	4.91672	38.0481	5.44013	46.2045	5.8641	47.857	12.615	39.7518	8.71718	38.6871	4.63216	44.5557	6.00053	43.7148	12.7722	52.0928	9.74675	49.5845
2.6549	31.2555	5.08621	38.9034	5.43957	47.1413	5.69216	48.7327	12.7818	40.633	8.88424	39.5593	4.79981	45.354	6.16793	44.6138	12.9396	52.9391	9.91474	50.4154
2.8231	32.068	5.08547	39.794	5.60992	47.8442	6.0312	49.4176	12.9489	41.4179	9.05128	40.4372	4.96744	46.1569	6.33566	45.4144	13.2773	53.7604	9.91287	51.172
2.82108	32.9159	5.42548	40.5313	5.77953	48.7616	5.85923	50.3019	13.2855	42.3831	9.38886	41.1896	4.96449	47.0989	6.33318	46.2492	13.4447	54.6158	9.91025	52.15
3.15945	33.7102	5.42505	41.3324	5.77927	49.6082	6.19751	51.2096	13.453	43.0749	9.38566	42.108	4.96224	47.8355	6.33067	47.0886	13.4423	55.3939	10.2484	52.9649
3.15738	34.5696	5.42426	42.2391	5.77936	50.3527	6.19608	51.9657	13.7899	43.9483	9.553	42.8997	5.12946	48.7582	6.66857	47.8733	13.9497	56.3107	10.4167	53.7039
3.1553	35.4347	5.59366	43.1219	5.94929	51.1782	6.19428	52.834	13.9566	44.857	9.72032	43.6959	5.12682	49.6094	6.66604	48.7218	13.9473	57.0968	10.5846	54.557
3.15319	36.3056	5.76338	43.9082	6.11883	52.1161	6.36267	53.6773	14.464	45.6072	9.88762	44.4967	5.12452	50.358	7.0039	49.5156	14.1146	57.9699	10.9227	55.3851
3.1514	37.0846	5.76288	44.7287	6.11888	52.8726	6.3612	54.4447	14.6307	46.5268	9.88435	45.4363	5.29206	51.1882	6.83113	50.4027	14.4526	58.7043	11.0906	56.2473
3.65989	37.8775	5.93258	45.524	6.11855	53.7413	6.35935	55.3261	14.798	47.2395	10.2218	46.2171	5.45958	52.023	7.33918	51.1761	14.6199	59.5859	11.2585	57.1141
3.65773	38.765	5.93205	46.3536	6.28842	54.5851	6.35787	56.1011	14.965	48.0626	10.2189	47.0617	5.62709	52.8623	7.16637	52.0724	14.617	60.5016	11.4267	57.8725
3.65588	39.5588	6.27157	47.2331	6.45826	55.4334	6.35599	56.991	15.1317	48.9976	10.5563	47.8516	5.62437	53.7358	7.33397	52.914	14.7847	61.2771	11.7648	58.7183
3.82423	40.3275	6.1008	48.1019	6.62847	56.1757	6.5243	57.8559	15.639	49.7711	10.7235	48.6758	5.62164	54.6138	7.67176	53.7306	15.1222	62.1423	11.5925	59.5433
3.65181	41.2607	6.44064	48.8865	6.62808	57.0621	6.6926	58.7254	15.6357	50.638	10.7205	49.534	5.78948	55.3562	7.66911	54.611	15.6303	62.8662	11.9306	60.3976
3.64992	42.0686	6.61026	49.7052	6.79789	57.9235	6.69106	59.5158	15.9729	51.4502	10.8878	50.3672	5.95692	56.2131	8.00687	55.4367	15.4572	63.8285	12.269	61.1415
3.98808	42.9238	6.60965	50.5581	6.62763	58.7364	6.85972	60.2801	16.31	52.267	11.0546	51.3137	5.95414	57.1042	8.17479	56.1852	15.6248	64.6189	12.2665	62.0635
3.98616	43.7415	6.77924	51.3859	6.6272	59.6359	6.68756	61.2212	16.3067	53.1476	11.2217	52.1567	6.12194	57.8581	8.34231	57.049	15.9626	65.3833	12.2645	62.8739
4.15443	44.5341	6.94881	52.2183	7.13776	60.3381	6.85619	61.993	16.3037	53.9218	11.219	52.9238	6.28934	58.7282	8.3396	57.947	16.1299	66.2991	12.2624	63.6878
4.15247	45.3608	6.94816	53.0848	7.1373	61.2461	7.02481	62.7683	16.811	54.7221	11.5564	53.7457	6.28652	59.6323	8.50748	58.7069	16.2975	67.1005	12.6004	64.5632
4.32036	46.2668	6.94749	53.9559	7.13721	62.0444	7.19302	63.6628	17.1477	55.6686	11.7235	54.6017	6.28407	60.4272	8.67496	59.5839	16.2949	67.9349	12.9383	65.4432
4.31837	47.1032	7.11738	54.6922	7.13671	62.9609	7.0212	64.5046	17.1447	56.4548	11.7208	55.3803	6.62203	61.1665	8.8428	60.3513	16.4624	68.7433	12.766	66.2981
4.31673	47.8388	7.4571	55.5127	7.30681	63.7371	7.18978	65.2908	17.3115	57.328	11.8879	56.2449	6.44895	62.1127	8.84004	61.2663	16.63	69.5551	12.9341	67.0974
4.48456	48.7601	7.45677	56.2861	7.30628	64.6622	7.18814	66.1101	17.6485	58.1761	11.8851	57.031	6.61667	62.889	9.00787	62.0412	16.7971	70.4915	13.1022	67.9002
4.48289	49.5037	7.62625	57.1447	7.47635	65.4459	7.18609	67.0507	17.6455	58.9737	12.2224	57.8745	6.61417	63.6983	9.00507	62.9648	17.1349	71.2813	13.2698	68.8263
4.65068	50.4352	7.79571	58.0078	7.4762	66.2625	7.52485	67.8183	17.8126	59.7453	12.2192	58.7817	6.95168	64.5685	9.00266	63.7766	17.3024	72.1042	13.4379	69.6366
4.64862	51.2944	7.79495	58.9051	7.64624	67.0532	7.52317	68.6486	17.8092	60.6651	12.2164	59.5793	6.94876	65.5022	9.34066	64.5329	17.47	72.9305	13.6059	70.4504
4.81675	52.1286	7.62436	59.7234	7.81628	67.8473	7.52149	69.4822	18.1465	61.4146	12.5536	60.4359	6.94662	66.2056	9.50804	65.4395	17.8077	73.7309	13.774	71.2677
4.81502	52.8881	7.96437	60.4567	7.81609	68.6744	7.69	70.2899	18.3133	62.3134	12.5504	61.3562	6.94407	67.0293	9.50559	66.2623	17.805	74.5936	13.7722	71.9963
4.98312	53.7308	8.13378	61.3369	7.98569	69.5945	7.51807	71.1601	18.4804	63.0999	12.7182	62.0199	7.11172	67.827	9.84314	67.148	18.1427	75.401	14.11	72.9127
4.981	54.6076	8.13296	62.2512	7.98548	70.4291	7.68656	71.9747	18.4773	63.9194	12.8852	62.9186	7.44916	68.7177	10.0109	67.9488	18.4804	76.2118	14.1078	73.77
5.14907	55.4594	8.13252	63.0549	7.98525	71.2672	7.68483	72.8223	18.9844	64.7717	13.0521	63.8219	7.44657	69.5524	10.179	68.6337	18.8176	77.1512	14.2758	74.6012
5.14729	56.2343	8.30228	63.8327	8.15522	72.0792	7.85329	73.644	18.9808	65.7172	13.3897	64.5828	7.44398	70.3906	10.0059	69.6198	18.8148	78.0284	14.2735	75.4655
5.31533	57.0947	8.64184	64.7004	8.15497	72.9243	8.02174	74.4691	18.8079	66.4587	13.0464	65.4653	7.61158	71.2028	10.1736	70.4311	19.1529	78.7242	14.6121	76.15
5.48373	57.8475	8.64136	65.5152	8.32492	73.7433	7.67955	75.3861	19.3149	67.3236	13.3839	66.2332	7.43874	72.0774	10.1715	71.1545	19.1501	79.608	15.1201	77.057
5.48153	58.7459	8.81068	66.421	8.15443	74.6248	8.01819	76.1887	19.482	68.1321	13.5512	67.0341	7.77653	72.8671	10.1685	72.123	19.1473	80.4951	15.4578	77.998
5.64991	59.5063	8.98039	67.2137	8.66478	75.3919	8.01681	76.93	19.4788	68.9735	13.7181	67.9579	7.77388	73.7193	10.5064	72.9153	19.4854	81.1995	15.4559	78.751
5.81789	60.3837	9.32029	67.9803	8.66448	76.2509	8.01501	77.798	19.4756	69.8184	13.8854	68.7663	7.94143	74.5454	10.5039	73.7699	19.6528	82.0638	15.7941	79.5737
5.81604	61.181	9.14955	68.839	9.00459	77.0544	8.1834	78.6401	19.8128	70.6079	13.7122	69.6371	7.93876	75.4045	10.6715	74.5986	19.4798	82.9904	15.962	80.4295
5.64357	62.1261	9.14902	69.6716	9.00427	77.9204	8.35178	79.4856	19.8096	71.4598	14.2199	70.3935	7.93608	76.2671	10.6693	75.337	19.988	83.6739	15.9597	81.3181
5.64169	62.9308	9.48848	70.5684	8.83372	78.8193	8.34994	80.3641	19.9765	72.2857	14.3871	71.2124	8.1036	77.1037	11.0068	76.2665	19.9851	84.5775	16.128	82.0531
5.98022	63.6801	9.65812	71.3791	9.00401	79.5378	8.34852	81.1198	19.9733	73.1445	14.3842	72.0642	8.2711	77.9438	11.0041	77.1352	20.1525	85.4552	16.2959	82.9188
5.97792	64.6081	9.65755	72.2227	9.34408	80.3548	8.51687	81.9754	20.1403	73.9774	14.5514	72.89	8.26881	78.6919	11.002	77.8825	20.49	86.307	16.4637	83.788
6.14621	65.3943	9.82717	73.0402	9.34371	81.2342	8.6852	82.8344	20.3072	74.8138	14.5484	73.7488	8.43629	79.5385	11.5095	78.7945	20.4876	87.0903	16.8022	84.5021
6.14428	66.2135	9.82657	73.8908	9.17355	82.0202	8.68332	83.7263	20.4746	75.5293	14.7156	74.5816	8.60376	80.3885	11.5073	79.5478	20.8256	87.8174	16.97	85.3778
6.14234	67.0363	9.99616	74.7154	9.51358	82.8472	8.68186	84.4936	20.8113	76.4676	14.8828	75.418	8.4308	81.301	11.6749	80.4005	20.9929	88.7081	17.1379	86.2569
6.13999	67.9808	9.99554	75.5729	9.51318	83.7365	8.85016	85.3625	20.808	77.3439	14.8797	76.2872	8.59868	82.0312	11.6722	81.286	21.1602	89.6022	17.4759	87.1102
6.30823	68.7815	10.1655	76.2812	9.51277	84.6294	8.84868	86.1354	20.8046	78.2237	15.0469	77.1305	8.76612	82.8912	11.8398	82.1456	21.3279	90.3673	17.4739	87.8947
6.47646	69.5856	10.3347	77.2395	9.68299	85.368	8.84675	87.0402	20.8017	78.9806	15.214	77.9773	8.93354	83.7547	11.8375	82.9105	21.4952	91.2679	17.4715	88.8132
6.47447	70.4228	10.3344	77.9832	9.85276	86.2379	9.18567	87.7598	20.9686	79.8374	15.5514	78.7981	9.27116	84.5923	12.0054	83.6484	21.8326	92.1427	17.6397	89.5739
6.64268	71.2339	10.3338	78.8542	9.85276	87.0115	9.01351	88.7005	21.1359	80.5704	15.3785	79.5844	9.26879	85.3635	12.173	84.5175	21.8301	92.9457	17.8075	90.4695
6.64066	72.078	10.5033	79.6992	10.0225	87.8879	9.35241	89.4256	21.1325	81.4631	15.5456	80.4411	9.43618	86.237	12.5107	85.3607	21.9978	93.7218	17.9757	91.2358
6.80884	72.8962	10.503	80.4515	10.022	88.7972	9.18022	90.3729	21.2994	82.3299	15.7132	81.174	9.43379	87.0137	12.3377	86.2956	22.165	94.6355	17.9733	92.1673
6.80681	73.7472	10.6725	81.303	10.1922	89.5499	9.17869	91.1623	21.4666	83.0715	15.8798	82.1651	9.60116	87.8937	12.5056	87.0451	22.5029	95.3878	18.1414	92.9391
6.97497	74.5723	10.8416	82.2846	10.5321	90.4068	9.34735	91.925	21.4632	83.9742	15.8771	82.9334	9.59876	88.6759	12.5033	87.8265	22.5004	96.2014	18.3096	93.7135
7.14353	75.2781	11.0115	83.0164	10.5321	91.1945	9.34534	92.8522	21.8007	84.6919	16.2144	83.7742	9.59589	89.5918	12.5006	88.7415	22.4974	97.1539	18.4773	94.625
6.97083	76.2919	11.0108	83.9078	10.7018	92.0873	9.51399	93.6204	21.7973	85.6011	16.3819	84.5187	9.76323	90.4817	12.8382	89.6011	22.8352	97.9144	18.8157	95.3756
7.13896	77.1275	11.1807	84.6452	10.7017	92.8806	9.68217	94.5248	21.7939	86.5137	16.549	85.3954	9.76079	91.2725	13.0056	90.4937	22.8327	98.7361	19.1536	96.2643
7.13728	77.8717	11.1799	85.543	10.8718	93.647	9.68059	95.3279	21.9611	87.2694	16.716	86.2756	10.0988	92.0071	13.0033	91.2866	23.17	99.6394	18.9813	97.1085
7.30538	78.7138	11.1796	86.3154	10.8713	94.5787	9.8492	96.1042	21.9576	88.1885	16.5431	87.0875	9.9261	92.8324	13.0009	92.0822	23.1679	100.329	19.1495	97.8966
7.13306	79.6182	11.5192	87.1609	11.0414	95.3506	10.0174	97.0181	22.1248	88.9497	16.7101	87.9741	10.2636	93.7054	12.9981	93.0136	23.5053	101.238	19.3171	98.8241
7.30113	80.4672	11.3482	88.0981	11.211	96.2594	10.0157	97.8293	22.1218	89.7429	16.8775	88.7327	10.2611	94.5069	13.3361	93.7559	23.6729	102.041	19.315	99.6471
7.63984	81.1641	11.5181	88.8496	11.2109	97.0663	10.1843	98.6137	22.2885	90.6421	17.0445	89.6259	10.2582	95.4452	13.3338	94.5596	23.84	102.986	19.3129	100.473
7.46748	82.0785	11.5172	89.7639	11.0406	97.9052	10.1827	99.4301	22.4557	91.4115	17.0417	90.4194	10.4259	96.2228	13.5011	95.4711	23.8373	103.824	19.6512	101.242
7.63595	82.8103	11.5168	90.5503	11.2106	98.6878	10.1806	100.386	22.4522	92.3466	17.2091	91.1861	10.5936	97.003	13.4987	96.2803	24.0049	104.635	19.6491	102.073
7.63378	83.7017	11.8564	91.4123	11.21	99.6384	10.3492	101.178	22.6193	93.1214	17.2059	92.1182	10.5911	97.8151	13.6665	97.0627	24.3427	105.42	19.8172	102.877
7.8018	84.5672	12.0262	92.1749	11.7205	100.368	10.5177	101.973	22.6163	93.9283	17.5435	92.8611	10.5881	98.7659	13.6641	97.877	24.34	106.265	19.9848	103.823
7.80004	85.337	12.196	92.94	11.7203	101.188	10.516	102.8	22.7829	94.8435	17.7104	93.7702	10.926	99.5248	13.8314	98.801	24.5076	107.084	20.1529	104.632
8.13825	86.1795	12.1952	93.8703	11.7202	102.011	10.8548	103.571	22.7799	95.6559	17.8778	94.548	10.9235	100.345	13.9992	99.5915	24.5049	107.935	20.1507	105.473
7.96626	86.9843	12.365	94.641	11.8897	102.944	10.5127	104.462	23.1172	96.4121	18.0452	95.3284	10.9209	101.168	13.8265	100.443	24.5022	108.789	20.4889	106.259
8.30445	87.8333	12.5343	95.5483	12.0597	103.743	10.6812	105.268	22.9439	97.259	18.0419	96.2764	10.9179	102.131	13.9943	101.239	24.84	109.586	20.4868	107.105
8.132	88.7741	12.704	96.3246	12.0595	104.574	11.0195	106.186	23.111	98.0497	18.2093	97.0623	11.0855	102.93	13.9918	102.067	25.0075	110.415	20.6548	107.925
8.3004	89.5286	12.8733	97.2384	12.3997	105.349	10.848	106.915	23.1074	99.0097	18.2064	97.8802	11.083	103.761	14.1591	103.006	25.175	111.247	20.8228	108.747
8.12837	90.3445	13.2133	97.9908	12.3995	106.185	10.8458	107.898	23.1047	99.6975	18.5439	98.6419	11.2506	104.565	14.3268	103.81	25.3425	112.081	20.9908	109.572
8.46651	91.2065	13.0426	98.834	12.3993	107.023	11.0143	108.714	23.2713	100.634	18.5406	99.6024	11.4182	105.372	14.4945	104.616	25.3398	112.947	20.9886	110.429
8.63443	92.1013	13.2123	99.6209	12.9092	107.917	11.1832	109.392	23.4384	101.436	18.5377	100.428	11.4156	106.21	14.492	105.454	25.5072	113.787	21.1566	111.259
8.46238	92.9257	13.5522	100.381	13.0792	108.731	11.1815	110.242	23.4347	102.408	18.705	101.228	11.413	107.052	14.4895	106.295	25.5045	114.658	21.4948	112.062
8.63073	93.6939	13.5513	101.34	13.0789	109.578	11.1798	111.094	23.4321	103.105	18.8723	102.029	11.5806	107.866	14.6572	107.109	25.6725	115.357	21.4926	112.926
8.62887	94.494	13.721	102.135	13.0787	110.427	11.5184	111.891	23.7693	103.884	19.0396	102.834	11.7482	108.683	14.6547	107.955	26.0096	116.321	21.6605	113.764
8.79675	95.4014	13.7204	102.962	13.4188	111.22	11.5162	112.892	23.9358	104.837	19.0362	103.81	11.9158	109.502	14.8224	108.774	26.0074	117.053	21.9987	114.575
8.79486	96.207	13.7199	103.791	13.4185	112.075	11.6851	113.58	24.1029	105.651	19.3737	104.59	11.9131	110.354	14.8198	109.625	26.1748	117.905	21.9964	115.447
8.79297	97.0153	13.8891	104.733	13.7586	112.873	11.6833	114.443	24.0997	106.498	19.3708	105.432	12.0807	111.178	14.9875	110.45	26.3422	118.759	22.5048	116.234
8.96082	97.9321	13.8886	105.568	13.7584	113.732	11.8517	115.279	24.2666	107.318	19.1976	106.306	12.078	112.035	15.1551	111.277	26.3394	119.645	22.3323	117.14
9.12912	98.7165	14.0582	106.377	13.9283	114.565	11.8499	116.147	24.0932	108.199	19.3648	107.123	12.2455	112.865	15.1525	112.135	26.3371	120.386	22.5007	117.844
9.1272	99.5328	14.2279	107.187	13.9279	115.429	12.0183	116.988	24.2607	108.881	19.7023	107.914	12.0727	113.756	15.3202	112.967	26.5045	121.248	22.6686	118.697
9.12527	100.352	14.5677	107.972	14.0978	116.267	12.017	117.715	24.2574	109.737	19.6993	108.766	12.4104	114.561	15.3181	113.687	26.8421	122.083	22.8365	119.552
9.29354	101.144	14.3969	108.846	14.2677	117.108	12.1853	118.561	24.4244	110.567	19.8665	109.591	12.4077	115.428	15.4852	114.668	26.8393	122.979	22.664	120.468
9.46134	102.076	14.3963	109.694	14.2678	117.834	12.0133	119.469	24.4212	111.428	20.0337	110.419	12.5752	116.268	15.4831	115.392	27.0072	123.698	23.0021	121.299
9.62959	102.874	14.5659	110.515	14.4377	118.679	12.1817	120.32	24.5881	112.263	20.2009	111.25	12.7432	116.965	15.6507	116.234	27.0044	124.599	23.17	122.162
9.62763	103.703	14.5653	111.368	14.4374	119.556	12.35	121.173	24.5848	113.13	20.1979	112.112	12.5703	117.869	15.8183	117.078	27.1722	125.322	23.3384	122.878
9.62518	104.674	14.9051	112.165	14.437	120.436	12.5189	121.882	24.7518	113.97	20.3656	112.803	12.9079	118.687	15.6454	117.984	27.3396	126.199	23.5063	123.746
9.79388	105.341	14.9045	113.024	14.6073	121.141	12.3463	122.947	24.7485	114.841	20.3621	113.815	12.9052	119.566	15.813	118.834	27.5069	127.077	23.8443	124.587
9.79189	106.178	14.9039	113.884	14.6069	122.026	12.5151	123.66	24.9159	115.541	20.5293	114.656	12.903	120.3	16.1513	119.509	27.6743	127.959	23.6717	125.518
9.78989	107.018	15.4139	114.66	14.6065	122.912	12.6834	124.523	25.0828	116.388	20.6964	115.499	12.8997	121.332	16.1486	120.393	27.6719	128.72	24.0103	126.213
9.95809	107.831	15.7531	115.612	14.9466	123.743	12.8522	125.24	24.9093	117.296	20.8641	116.199	13.0677	122.041	16.1459	121.279	28.0094	129.577	24.1781	127.091
9.95559	108.817	15.9227	116.451	14.9461	124.635	12.6801	126.167	25.0761	118.148	20.861	117.076	13.0649	122.93	16.1433	122.167	28.0065	130.494	24.1758	128
10.1243	109.494	15.9225	117.177	14.9462	125.38	12.8489	126.887	25.4137	118.826	21.1984	117.897	13.2323	123.793	16.1411	122.91	28.0042	131.261	24.3441	128.731
10.2924	110.315	16.092	118.021	14.9458	126.277	13.1874	127.731	25.2397	119.89	20.8548	118.838	13.23	124.538	16.3086	123.774	28.1715	132.155	24.3417	129.645
10.2904	111.167	16.0913	118.897	15.1161	126.996	13.1855	128.636	25.4071	120.601	21.0225	119.546	13.3974	125.405	16.4761	124.641	28.3393	132.896	24.6802	130.35
10.4585	111.993	16.2609	119.747	15.1157	127.898	13.3538	129.514	25.4037	121.493	21.3598	120.375	13.5649	126.274	16.6441	125.36	28.1667	133.698	24.6778	131.268
10.4565	112.851	16.2606	120.481	15.4556	128.743	13.3523	130.272	25.4008	122.238	21.3567	121.264	13.3918	127.205	16.6414	126.261	28.5041	134.569	24.8456	132.16
10.4544	113.711	16.2599	121.364	15.4552	129.649	13.3504	131.184	25.7379	123.075	21.5243	121.979	13.5597	127.929	16.6392	127.013	28.5012	135.501	24.8437	132.93
10.7927	114.516	16.5996	122.192	15.7956	130.348	13.5192	131.916	25.5643	124.003	21.5212	122.873	13.7271	128.805	16.8062	128.04	28.669	136.25	25.0119	133.672
10.7907	115.381	16.7691	123.051	15.625	131.289	13.6874	132.804	25.7311	124.875	21.6882	123.741	13.895	129.533	16.9742	128.768	28.6665	137.031	25.1797	134.571
10.9588	116.22	16.7684	123.942	15.9654	131.991	13.6854	133.723	25.7282	125.628	21.8553	124.611	13.8922	130.444	16.8017	129.555	29.004	137.911	25.1778	135.347
11.1269	117.061	16.7681	124.687	15.9649	132.907	13.8542	134.462	25.8956	126.354	21.8527	125.362	14.06	131.176	16.9692	130.439	29.1718	138.666	25.3455	136.25
11.1248	117.934	16.7674	125.582	15.9649	133.672	13.8527	135.232	26.0623	127.232	22.1899	126.208	13.887	132.12	17.1372	131.172	29.1688	139.61	25.3436	137.029
11.1232	118.664	16.7671	126.331	16.3048	134.534	13.8507	136.158	26.0589	128.143	22.1868	127.115	14.0548	132.856	17.3046	132.06	29.3365	140.369	25.3416	137.81
11.2912	119.512	16.9366	127.202	16.1341	135.486	14.0194	136.902	26.0555	129.056	22.1836	128.024	14.0519	133.776	16.9614	133.038	29.3335	141.317	25.6795	138.692
11.2891	120.393	17.106	128.076	16.1346	136.103	14.1876	137.804	26.2228	129.79	22.3512	128.754	14.2198	134.515	17.2996	133.748	29.5013	142.08	25.8472	139.605
11.4572	121.246	17.1057	128.83	16.6442	137.098	14.3563	138.552	26.3901	130.525	22.5182	129.639	14.3871	135.411	17.2973	134.518	29.4988	142.874	25.8453	140.392
11.455	122.132	17.2751	129.709	16.474	137.902	14.1841	139.517	26.3866	131.445	22.5155	130.403	14.2145	136.213	17.6349	135.387	29.666	143.8	26.013	141.309
11.6235	122.842	17.4451	130.438	16.474	138.679	14.3528	140.269	26.3837	132.214	22.6825	131.292	14.3818	137.113	17.4624	136.19	29.8337	144.569	26.011	142.1
11.7916	123.703	17.4443	131.35	16.6436	139.584	14.3507	141.209	26.7206	133.08	22.6798	132.06	14.3794	137.89	17.4596	137.121	29.8306	145.528	26.1792	142.864
11.9596	124.567	17.4434	132.265	16.8138	140.336	14.5194	141.965	26.7172	134.008	23.0175	132.771	14.5467	138.795	17.6275	137.87	29.9989	146.14	26.3469	143.789
11.9579	125.313	17.6133	133	17.1536	141.217	14.5174	142.91	26.7142	134.782	23.0143	133.696	14.8847	139.517	17.7949	138.777	30.166	147.075	26.5151	144.556
12.1259	126.181	17.6125	133.92	16.9834	142.03	15.0264	143.612	26.7112	135.559	23.0111	134.624	14.8818	140.456	17.9623	139.686	30.3337	147.851	26.6833	145.326
12.1237	127.081	17.7824	134.659	17.153	142.945	14.8547	144.432	26.8779	136.464	23.1786	135.37	14.8794	141.24	17.9599	140.47	30.3312	148.659	27.0211	146.228
12.122	127.833	17.7815	135.583	17.153	143.734	14.6824	145.413	27.0446	137.371	23.1753	136.303	14.877	142.026	17.9576	141.256	30.4984	149.6	27.0191	147.03
12.29	128.708	17.9514	136.327	17.4933	144.466	15.0213	146.15	26.872	138.026	23.3428	137.053	15.0442	142.943	18.1249	142.173	30.4958	150.411	27.1867	147.966
12.458	129.586	18.1208	137.226	17.4927	145.417	15.1893	147.077	27.0387	138.938	23.34	137.834	15.0418	143.733	18.2928	142.933	30.4933	151.224	27.1847	148.773
12.7967	130.286	18.1204	138.003	17.833	146.153	15.358	147.847	27.2053	139.852	23.507	138.745	15.209	144.654	18.2905	143.725	30.6609	152.01	27.3529	149.552
12.6242	131.227	18.2897	138.907	18.0026	147.079	15.3564	148.648	27.2023	140.64	23.6739	139.658	15.3773	145.26	18.4583	144.489	30.828	152.96	27.521	150.332
12.6225	131.989	18.1192	139.716	18.1727	147.848	15.3543	149.611	27.3695	141.401	23.8413	140.416	15.5445	146.186	18.4554	145.443	30.9957	153.75	27.5184	151.307
12.9607	132.847	18.4592	140.44	18.1721	148.808	15.3532	150.254	27.366	142.351	23.8386	141.205	15.5415	147.143	18.6233	146.211	30.8229	154.599	27.8568	152.062
13.1286	133.737	18.2881	141.41	18.172	149.61	15.5213	151.193	27.5332	143.116	24.0055	142.124	15.539	147.943	18.4507	147.04	31.1608	155.363	28.0249	152.849
12.9566	134.535	18.4579	142.166	18.3421	150.385	15.5197	152.001	27.5301	143.912	24.0027	142.917	15.877	148.686	18.618	147.972	31.3284	156.158	28.0223	153.83
13.1246	135.429	18.6272	143.082	18.5122	151.161	16.0282	152.886	27.6973	144.68	24.3403	143.653	15.8739	149.65	18.7858	148.746	31.3253	157.148	28.0202	154.649
13.1228	136.201	18.6268	143.872	18.5121	151.969	16.0266	153.698	27.6937	145.639	24.5072	144.58	15.7018	150.323	18.7834	149.55	31.4929	157.947	28.1883	155.441
13.2907	137.101	18.7966	144.634	18.6816	152.911	16.0249	154.512	27.6907	146.441	24.164	145.437	16.0392	151.234	18.7811	150.357	31.4903	158.777	28.3564	156.235
13.1187	137.906	18.6255	145.616	18.6815	153.722	16.1935	155.298	28.028	147.186	24.6713	146.31	16.0367	152.043	18.7786	151.165	31.6579	159.579	28.5245	157.031
13.1164	138.839	18.7953	146.382	18.8515	154.506	16.0217	156.145	27.6846	148.049	24.4983	147.142	16.2038	152.986	19.1161	152.079	31.8255	160.383	28.5224	157.858
13.2848	139.589	19.1347	147.28	18.8514	155.321	16.3599	157.07	27.8512	148.988	24.4955	147.946	16.0311	153.828	18.9435	152.921	31.8229	161.218	28.69	158.823
13.7936	140.283	19.3045	148.05	18.681	156.167	16.5285	157.862	28.1885	149.739	24.6628	148.723	16.1988	154.614	19.1113	153.705	31.9904	162.025	28.6878	159.653
13.9615	141.194	19.4743	148.822	19.0207	157.091	16.5268	158.685	28.0152	150.578	25.0004	149.472	16.5367	155.372	19.1089	154.521	32.158	162.835	29.0267	160.261
13.9592	142.137	19.4738	149.625	19.0206	157.912	16.6954	159.481	28.1823	151.362	24.8268	150.473	16.3639	156.219	19.2766	155.31	32.1554	163.675	29.024	161.262
14.1275	142.895	19.4729	150.591	19.1906	158.705	16.6937	160.308	28.3489	152.31	25.1644	151.226	16.5316	157.01	19.2736	156.293	32.1522	164.685	29.1921	162.068
14.1252	143.843	19.6426	151.369	19.1904	159.529	16.8622	161.107	28.3458	153.126	25.1616	152.04	16.5291	157.832	19.2712	157.114	32.3203	165.332	29.3601	162.877
14.2941	144.447	19.6422	152.177	19.1897	160.521	17.2004	162.046	28.3427	153.944	25.3284	152.989	16.6962	158.791	19.439	157.909	32.4879	166.148	29.358	163.716
14.2917	145.398	19.8113	153.121	19.3597	161.32	17.0285	162.907	28.5092	154.899	25.3255	153.806	16.8638	159.588	19.6067	158.705	32.4846	167.165	29.526	164.529
14.4601	146.164	19.9811	153.904	19.36	161.983	17.197	163.712	28.6769	155.527	25.3226	154.626	17.0315	160.386	19.7745	159.502	32.8224	167.956	29.6941	165.343
14.6279	147.091	20.1508	154.689	19.3598	162.815	17.1954	164.548	28.8434	156.487	25.49	155.417	17.1991	161.186	19.772	160.331	32.8203	168.637	29.6919	166.187
14.626	147.89	19.9801	155.534	19.5293	163.786	17.1937	165.386	28.8403	157.312	25.8275	156.182	17.1965	162.018	19.7695	161.161	32.8176	169.49	29.6892	167.203
14.7944	148.662	20.4897	156.428	19.6993	164.592	17.3621	166.196	28.8371	158.14	25.8246	157.006	17.194	162.85	19.767	161.993	32.9846	170.486	29.8578	167.853
14.7919	149.625	20.319	157.277	19.699	165.429	17.5306	167.009	29.1744	158.911	25.8212	157.998	17.361	163.823	20.1044	162.936	33.1521	171.314	30.1954	168.815
14.9603	150.401	20.6589	158.041	19.6988	166.267	17.6991	167.823	29.001	159.771	25.9885	158.797	17.3584	164.66	19.9317	163.801	33.15	172	30.1932	169.668
15.2983	151.31	20.8286	158.835	19.8688	167.079	17.8676	168.638	29.1681	160.574	26.1564	159.432	17.526	165.469	19.9292	164.639	33.3175	172.831	30.5314	170.464
15.2964	152.119	20.8281	159.661	20.209	167.863	17.6957	169.514	29.3351	161.38	26.1529	160.431	17.6936	166.28	20.0969	165.45	33.3148	173.693	30.3596	171.177
15.2945	152.929	20.9972	160.624	20.2087	168.707	17.8641	170.333	29.1618	162.245	26.15	161.264	17.8612	167.093	20.0944	166.291	33.4823	174.527	30.5276	172.006
15.4628	153.712	21.1675	161.258	20.2084	169.553	17.8624	171.184	29.3288	163.054	26.3173	162.071	17.6884	167.966	20.0919	167.134	33.4796	175.392	30.5254	172.865
15.4609	154.526	20.9967	162.118	20.2082	170.401	18.2011	171.978	29.4958	163.865	26.3143	162.908	17.856	168.783	20.0893	167.979	33.647	176.23	30.6934	173.696
15.6286	155.476	21.1658	163.088	20.3781	171.221	18.1993	172.831	29.4921	164.875	26.4816	163.718	17.8534	169.63	20.257	168.797	33.8145	177.07	30.6912	174.559
15.9671	156.235	21.5057	163.864	20.5481	172.043	18.3678	173.658	29.8293	165.66	26.4787	164.559	18.0209	170.45	20.4247	169.616	33.6416	177.969	31.0293	175.365
16.1354	157.026	21.5052	164.701	20.5478	172.896	18.366	174.515	29.6559	166.535	26.8161	165.343	18.0189	171.131	20.5924	170.438	33.809	178.813	31.0271	176.231
15.9632	157.876	21.5046	165.539	20.7177	173.722	18.5344	175.345	29.8235	167.184	26.8132	166.188	18.1858	172.125	20.4196	171.319	33.8063	179.687	31.1951	177.07
16.3011	158.806	21.8444	166.32	20.7174	174.578	18.5326	176.206	29.8197	168.202	26.8096	167.203	18.3534	172.95	20.5873	172.143	33.9743	180.358	31.1928	177.94
16.129	159.661	22.0141	167.133	20.7171	175.437	18.7011	177.04	29.9867	169.024	27.1477	167.824	18.1805	173.836	20.5853	172.828	34.1418	181.206	31.1905	178.812
16.2978	160.293	21.8433	168.005	20.887	176.268	19.0397	177.846	30.1536	169.848	27.1447	168.674	18.5183	174.636	20.7523	173.828	34.3092	182.056	31.3585	179.656
16.4655	161.258	21.8427	168.851	21.0569	177.101	19.0379	178.712	30.151	170.531	27.1417	169.525	18.5162	175.323	20.9206	174.486	34.4767	182.908	31.6972	180.298
16.4635	162.089	22.0123	169.669	21.0566	177.964	19.0361	179.58	30.3174	171.529	27.1387	170.379	18.5135	176.185	20.7478	175.375	34.4739	183.791	31.6949	181.174
16.6317	162.892	22.182	170.488	21.2265	178.801	19.2051	180.247	30.3147	172.215	27.306	171.205	18.681	177.019	20.9154	176.209	34.3015	184.527	31.6927	182.052
16.6298	163.726	22.0111	171.368	21.2268	179.494	19.2033	181.118	30.1413	173.104	27.303	172.061	18.6783	177.883	20.9128	177.073	34.6391	185.355	31.6904	182.933
16.798	164.533	22.3504	172.333	21.2264	180.363	19.3716	181.962	30.6486	173.878	27.4702	172.891	18.6757	178.75	21.0804	177.91	34.8065	186.214	31.8583	183.785
16.9662	165.342	22.3503	173.016	21.7367	181.147	19.54	182.808	30.4752	174.77	27.6374	173.723	19.0134	179.56	21.248	178.749	34.9746	186.896	32.0268	184.463
16.9636	166.349	22.5199	173.843	21.7364	182.019	19.5382	183.684	30.8123	175.577	27.4642	174.614	19.0107	180.43	21.4156	179.589	35.1414	187.936	32.1947	185.319
16.792	167.052	22.5193	174.701	22.0759	183.01	19.5364	184.563	30.8091	176.443	27.8015	175.42	19.1782	181.273	21.5832	180.431	35.1391	188.65	32.3626	186.177
17.1304	167.837	22.5187	175.56	21.9059	183.74	19.7047	185.414	30.8064	177.138	27.7991	176.112	19.176	181.972	21.5806	181.304	35.3065	189.516	32.1901	187.095
17.2986	168.652	22.6883	176.392	22.0757	184.588	19.8737	186.09	30.8025	178.181	27.9657	177.124	19.3435	182.818	21.7488	181.975	35.3037	190.412	32.5282	187.927
17.296	169.669	22.8578	177.226	22.2456	185.438	20.042	186.945	30.97	178.85	28.1329	177.964	19.511	183.666	21.5759	182.88	35.4711	191.281	32.696	188.79
17.4647	170.318	22.8572	178.091	22.4154	186.291	20.0402	187.83	30.9667	179.723	28.1304	178.661	19.5083	184.545	21.7435	183.729	35.4689	192	32.6943	189.505
17.8025	171.281	22.8571	178.784	22.7555	187.116	20.2085	188.688	31.1336	180.569	28.297	179.679	20.0161	185.339	21.7409	184.609	35.6362	192.872	33.0324	190.343
17.6303	172.162	23.0261	179.797	22.5855	187.852	20.3768	189.547	31.3005	181.417	28.1243	180.408	20.0134	186.221	22.0786	185.433	35.6334	193.775	33.2003	191.211
17.799	172.816	23.026	180.493	23.0957	188.651	20.3756	190.259	31.2972	182.296	28.4617	181.226	20.0112	186.928	21.9064	186.168	35.8007	194.651	33.1979	192.11
17.797	173.672	23.3657	181.307	23.2655	189.51	20.3737	191.151	31.2945	183	28.6288	182.075	20.0085	187.813	22.2441	186.995	35.7985	195.376	33.3658	192.982
17.9651	174.5	23.3651	182.18	23.2651	190.4	20.542	192.016	31.2912	183.882	28.6258	182.955	20.1759	188.672	21.9011	187.94	35.7956	196.284	33.1938	193.732
18.1333	175.33	23.7048	182.997	23.6051	191.233	20.7103	192.882	31.6283	184.707	28.7929	183.807	20.3434	189.532	22.2388	188.77	35.9636	196.983	33.5318	194.578
18.3014	176.162	23.8743	183.845	23.6053	191.948	20.8786	193.751	31.6249	185.593	28.9606	184.485	20.5108	190.394	22.2367	189.482	36.1309	197.865	33.7003	195.274
18.2993	177.025	23.8736	184.724	23.7745	192.993	21.0475	194.441	31.7918	186.451	28.7873	185.398	20.3378	191.315	22.4043	190.345	36.2983	198.749	33.6979	196.181
18.4674	177.86	23.8729	185.604	23.9449	193.681	21.2158	195.312	31.7885	187.34	28.9544	186.256	20.676	191.973	22.4016	191.238	36.296	199.48	33.6955	197.09
18.4654	178.726	24.2132	186.252	24.1147	194.55	21.0437	196.243	31.7857	188.052	29.1215	187.115	20.503	192.897	22.3989	192.133	36.4633	200.367	33.864	197.789
18.8037	179.536	24.2125	187.135	24.1142	195.45	21.2126	196.937	31.7823	188.944	29.119	187.827	20.8407	193.737	22.5664	193.001	36.4604	201.285	33.8616	198.701
18.9718	180.377	24.2118	188.021	23.9442	196.201	21.3808	197.814	31.779	189.838	29.2855	188.868	20.8378	194.636	22.5643	193.72	36.6283	201.992	34.1996	199.557
19.3101	181.191	24.0408	188.937	24.4544	197.017	21.5491	198.692	32.1166	190.497	29.4532	189.554	21.0058	195.328	22.7318	194.591	36.6254	202.913	34.1972	200.473
18.9676	182.122	24.3811	189.59	24.6241	197.893	21.3776	199.448	32.1133	191.394	29.6203	190.42	21.1732	196.202	22.8993	195.464	36.6232	203.651	34.3656	201.178
19.3059	182.939	24.3804	190.48	24.4535	198.829	21.5459	200.329	32.2801	192.264	29.4476	191.166	21.0002	197.135	22.8972	196.187	36.7904	204.546	34.5334	202.068
19.4745	183.611	24.5499	191.344	24.794	199.497	21.7141	201.213	32.1071	193.013	29.6146	192.035	21.1682	197.831	22.8944	197.092	36.9577	205.444	34.3614	202.833
19.6426	184.461	24.7193	192.209	24.6233	200.436	21.8823	202.098	32.2739	193.886	29.7817	192.906	21.5058	198.681	22.8917	197.999	36.9554	206.186	34.5292	203.726
19.8107	185.312	24.7186	193.104	24.9633	201.29	22.0512	202.801	32.4407	194.761	29.9488	193.779	21.5029	199.59	23.0598	198.697	37.1227	207.086	34.6969	204.621
19.9782	186.341	24.8886	193.793	24.7932	202.05	22.0492	203.718	32.4373	195.667	29.776	194.531	21.5007	200.319	23.0571	199.607	37.1204	207.831	34.6951	205.362
19.9766	187.048	24.8879	194.692	24.9629	202.936	22.2181	204.424	32.6047	196.364	29.9431	195.407	21.4979	201.231	23.3953	200.279	37.1174	208.763	34.8629	206.26
20.1447	187.905	25.0573	195.564	25.1333	203.64	22.2161	205.345	32.6013	197.273	30.1101	196.284	21.6652	202.117	23.2224	201.221	37.1145	209.697	35.0312	206.974
20.1425	188.792	25.0571	196.286	25.1328	204.558	22.3843	206.238	32.7687	197.972	30.1076	197.011	21.663	202.849	23.3898	202.107	37.4526	210.388	35.199	207.875
20.4808	189.623	25.2266	197.161	25.4727	205.421	22.383	206.977	32.9355	198.855	30.2746	197.892	21.8303	203.738	23.387	203.024	37.4502	211.138	35.1965	208.807
20.4786	190.514	25.2258	198.067	25.643	206.129	22.7214	207.844	33.1023	199.74	30.4416	198.775	21.9983	204.444	23.5551	203.73	37.6175	212.048	35.5351	209.497
20.6472	191.199	25.5654	198.916	25.4723	207.081	22.7194	208.771	32.7591	200.531	30.4391	199.506	21.9954	205.365	23.5523	204.65	37.7847	212.96	35.8731	210.374
20.4748	192.122	25.5652	199.644	25.8122	207.948	22.8882	209.486	33.096	201.39	30.6061	200.392	22.1627	206.259	23.5502	205.387	37.6122	213.743	35.701	211.153
20.8131	192.96	25.3942	200.583	25.9825	208.66	22.8868	210.23	33.2628	202.28	30.6029	201.308	22.1605	206.998	23.5474	206.31	37.9496	214.629	36.0389	212.033
20.9817	193.649	25.7338	201.438	25.982	209.589	22.8848	211.161	33.0898	203.045	30.6003	202.043	22.3278	207.895	23.885	207.178	37.9472	215.385	36.0364	212.974
20.9795	194.548	25.5634	202.198	26.1516	210.49	23.0536	211.879	33.4267	203.909	30.7673	202.934	22.4951	208.793	23.7126	207.948	38.1145	216.303	36.2048	213.698
21.1475	195.419	25.903	203.056	26.3219	211.206	23.2218	212.785	33.4233	204.833	30.7647	203.671	22.4928	209.537	24.0509	208.633	38.1121	217.062	36.2023	214.642
21.1453	196.322	25.9028	203.79	26.4916	212.11	23.39	213.693	33.2502	205.602	30.9317	204.565	22.4905	210.281	23.8778	209.591	38.1091	218.012	36.3706	215.369
21.3139	197.016	25.7318	204.738	26.8321	212.8	23.5588	214.415	33.5871	206.472	31.0993	205.276	22.6578	211.184	24.2154	210.465	38.1067	218.774	36.5383	216.287
21.4819	197.893	25.9011	205.629	26.6613	213.765	23.5567	215.355	33.4141	207.243	31.2663	206.174	22.4847	212.147	24.043	211.24	38.2746	219.508	36.5365	217.045
21.6498	198.772	25.9009	206.367	27.0011	214.646	23.7249	216.268	33.5808	208.145	31.0928	207.131	22.6526	212.867	24.2111	211.959	38.2715	220.463	36.7041	217.966
21.8184	199.47	26.0703	207.262	26.831	215.426	23.7234	217.022	33.5779	208.89	31.4306	207.817	22.9901	213.746	24.2082	212.895	38.4394	221.199	36.8725	218.699
21.8162	200.381	26.4105	207.945	27.0013	216.15	24.0624	217.72	33.7447	209.795	31.4274	208.748	23.1573	214.656	24.3762	213.616	38.6065	222.128	36.7004	219.49
21.9841	201.264	26.2394	208.901	27.1709	217.064	24.2306	218.638	34.0822	210.485	31.4248	209.494	23.155	215.408	24.3734	214.555	38.434	222.925	37.0382	220.387
22.1521	202.15	26.4094	209.615	27.1703	218.009	24.2285	219.586	34.0787	211.422	31.4215	210.429	23.3223	216.322	24.5414	215.279	38.6018	223.665	37.0363	221.152
22.3207	202.854	26.4085	210.545	27.1704	218.766	24.3973	220.317	34.0758	212.172	31.5885	211.336	23.1498	217.105	24.3683	216.251	38.7689	224.599	37.204	222.08
22.3184	203.771	26.5778	211.448	27.5108	219.466	24.3958	221.078	33.9021	213.141	31.756	212.058	23.3177	217.833	24.5357	217.166	38.7665	225.37	37.2014	223.04
22.3168	204.506	26.5776	212.195	27.5102	220.415	24.5639	222.002	34.0694	213.865	31.9236	212.78	23.4849	218.751	24.5334	217.923	38.9337	226.307	37.3704	223.588
22.4847	205.398	26.9171	213.073	27.6805	221.147	24.5625	222.765	34.2361	214.78	31.7501	213.75	23.6521	219.67	24.8716	218.623	38.9313	227.081	37.538	224.521
22.8228	206.263	26.7466	213.851	27.8501	222.071	24.9008	223.664	34.2332	215.535	32.0872	214.635	23.9902	220.373	24.8687	219.572	39.2686	227.993	37.3659	225.321
22.651	207.031	26.7457	214.79	27.8494	223.025	24.8994	224.43	34.3999	216.453	32.0846	215.391	23.8177	221.163	25.0367	220.303	39.2662	228.769	37.7037	226.229
22.8189	207.928	26.9157	215.513	28.0197	223.76	25.0675	225.36	34.3969	217.211	32.0819	216.147	23.8147	222.116	25.0338	221.255	39.2638	229.547	37.7018	227.003
22.9874	208.641	27.085	216.426	27.8495	224.555	25.066	226.129	34.3934	218.161	32.2488	217.066	23.9825	222.851	24.8614	222.047	39.2607	230.521	37.8694	227.943
23.1553	209.541	27.2549	217.151	28.1899	225.264	25.2347	226.87	34.3905	218.921	32.2462	217.825	23.9795	223.807	24.8585	223.002	39.4285	231.272	38.0377	228.69
23.3232	210.443	27.4248	217.878	28.1893	226.224	25.4028	227.804	34.5578	219.655	32.4131	218.746	23.9772	224.573	25.1966	223.71	39.426	232.054	38.2053	229.634
23.4917	211.16	27.2537	218.853	28.3588	227.158	25.2311	228.606	34.7244	220.58	32.4104	219.508	24.3146	225.475	25.0242	224.506	39.7633	232.975	38.3736	230.384
23.4894	212.093	27.5932	219.744	28.529	227.9	25.3992	229.544	34.891	221.507	32.5773	220.433	24.3122	226.244	25.3617	225.408	39.5907	233.787	38.3716	231.164
23.8282	212.784	27.2525	220.561	28.6992	228.643	25.3977	230.319	34.8881	222.273	32.5746	221.197	24.4801	226.985	25.3594	226.177	39.7585	234.544	38.5392	232.111
23.8258	213.721	27.4224	221.293	28.5284	229.638	25.7359	231.231	35.2256	222.982	32.5713	222.154	24.477	227.95	25.3565	227.141	39.7553	235.527	38.5373	232.894
23.8235	214.66	27.4215	222.246	28.5284	230.413	25.5643	232.038	35.222	223.943	32.7388	222.892	24.6449	228.693	25.3542	227.912	39.7535	236.118	38.5353	233.678
23.8218	215.412	27.5913	222.981	28.6986	231.16	26.0734	232.73	35.0489	224.741	33.0765	223.603	24.8127	229.438	25.5221	228.656	39.9206	237.075	38.8731	234.601
24.1605	216.108	27.9308	223.879	28.6979	232.131	25.901	233.733	35.2161	225.484	33.0732	224.564	24.9799	230.378	25.5192	229.624	39.9182	237.865	39.0413	235.359
24.1581	217.052	27.9305	224.645	29.0383	232.852	26.0697	234.486	35.3827	226.42	33.0705	225.335	25.147	231.32	25.6871	230.371	40.0859	238.627	39.2096	236.118
24.326	217.968	28.1004	225.383	29.0376	233.826	26.2384	235.239	35.3798	227.193	33.0671	226.3	25.1446	232.098	25.6848	231.148	40.4232	239.56	39.2069	237.103
24.3243	218.726	28.0994	226.344	29.0375	234.607	26.2369	236.023	35.3762	228.162	33.0644	227.073	25.1422	232.877	25.8521	232.091	40.2505	240.382	39.3751	237.865
24.4921	219.645	28.2686	227.277	29.0375	235.389	26.4049	236.975	35.3732	228.938	33.0617	227.847	25.1398	233.657	25.8498	232.87	40.248	241.177	39.5433	238.627
24.8308	220.348	28.2683	228.048	29.3779	236.114	26.4034	237.761	35.5404	229.686	33.3987	228.759	25.4772	234.576	25.8475	233.651	40.5853	242.115	39.5407	239.617
24.6589	221.138	28.4382	228.792	29.5474	237.066	26.5714	238.716	35.707	230.63	33.396	229.536	25.4748	235.359	26.0147	234.599	40.4126	242.941	39.5387	240.411
24.9969	222.033	28.7776	229.701	29.5473	237.852	26.5698	239.505	35.704	231.41	33.3933	230.314	25.4723	236.142	26.1826	235.353	40.7505	243.682	39.8771	241.149
25.1654	222.768	28.9475	230.447	29.5473	238.639	26.9087	240.237	35.8713	232.162	33.5601	231.259	25.4693	237.124	26.3498	236.304	40.5778	244.511	39.8744	242.144
24.9928	223.753	28.9465	231.418	29.7168	239.595	26.737	241.056	35.8676	233.139	33.7276	232.011	25.637	237.881	26.3475	237.09	40.7448	245.483	40.0426	242.912
25.1612	224.491	28.9461	232.195	29.7167	240.384	26.9049	242.018	35.6944	233.952	33.7248	232.792	25.8042	238.837	26.3452	237.877	40.9125	246.256	40.0406	243.711
25.329	225.422	29.116	232.945	29.7166	241.175	27.0736	242.782	36.0318	234.678	33.8916	233.742	25.9719	239.597	26.5131	238.635	40.91	247.06	40.379	244.453
25.3272	226.19	29.2851	233.891	30.2265	242.078	27.2423	243.548	35.8586	235.493	34.0591	234.498	25.7993	240.416	26.6803	239.593	40.9075	247.864	40.5465	245.426
25.3248	227.153	29.2848	234.672	29.886	242.929	27.4102	244.514	36.1954	236.419	34.0557	235.48	25.9671	241.178	26.6779	240.383	40.905	248.67	40.5445	246.228
25.6635	227.867	29.4546	235.425	30.0561	243.694	27.5789	245.283	36.1924	237.207	34.3933	236.209	25.9646	241.97	26.8458	241.146	--	--	40.5425	247.031
25.6617	228.64	29.4536	236.405	30.3958	244.631	27.7475	246.052	36.1894	237.997	34.2204	237.026	25.9622	242.764	26.8428	242.137	41.0727	249.448	40.7107	247.807
25.6593	229.607	29.4532	237.19	30.3957	245.428	27.7453	247.052	36.3559	238.956	34.3878	237.786	26.1292	243.728	27.0106	242.902	41.9219	249.911	40.7086	248.613
25.8277	230.353	29.7932	237.918	30.5658	246.197	27.7437	247.852	36.3529	239.748	34.5546	238.745	26.297	244.496	27.0083	243.697	41.0717	249.852	40.8761	249.593
25.9955	231.295	29.7922	238.902	30.9062	246.939	27.9123	248.626	36.5201	240.512	34.7213	239.706	26.4647	245.264	27.0059	244.494	41.2415	250.025	--	--
25.8235	232.102	29.962	239.662	30.9054	247.939	--	--	36.5164	241.505	34.7192	240.301	26.4616	246.262	27.0029	245.491	41.2424	249.823	41.3854	250.113
26.1621	232.823	29.9609	240.649	30.9053	248.741	28.0803	249.601	36.6835	242.272	34.886	241.265	26.4591	247.062	27.1707	246.261	41.0724	249.852	41.2165	249.939
25.9894	233.827	30.1307	241.411	--	--	28.4211	249.745	36.6805	243.069	35.0534	242.031	26.6269	247.834	27.1683	247.061	41.2428	249.823	41.2172	249.939
25.9876	234.608	30.3006	242.175	31.0754	249.515	28.2521	249.773	36.6775	243.867	35.0506	242.828	26.6244	248.636	27.166	247.862	41.2431	249.823	41.0478	249.968
26.156	235.362	30.1299	242.997	31.417	249.859	28.2532	249.773	36.6744	244.666	35.0471	243.825	--	--	27.5033	248.807	41.4135	249.795	41.3889	249.911
26.3238	236.313	30.2997	243.763	31.0793	249.917	28.2544	249.773	37.0111	245.609	35.2145	244.595	26.6212	249.64	--	--	41.2428	250.025	41.3896	249.911
26.4921	237.07	30.6391	244.7	31.5925	249.831	28.2555	249.773	37.0081	246.41	35.2117	245.395	26.9626	249.381	27.3307	249.64	41.4133	249.997	41.3903	249.911
26.4903	237.856	30.4684	245.526	31.5951	249.831	28.4269	249.745	37.1752	247.185	35.3791	246.168	26.7906	250.013	27.5013	249.611	41.2433	250.025	41.391	249.911
26.4878	238.84	30.8084	246.267	31.5978	249.831	28.4273	249.946	37.002	248.017	35.3757	247.171	26.7915	249.812	27.8407	249.956	41.2442	249.823	41.5619	249.882
26.6562	239.6	30.8073	247.266	31.7699	250.003	28.5987	249.917	37.1684	248.995	35.543	247.946	26.7911	250.013	27.841	249.956	41.4139	249.997	41.5626	249.882
26.8246	240.362	30.6367	248.096	31.7725	250.003	28.4296	249.946	--	--	35.5402	248.751	26.792	249.812	27.6712	249.985	41.5844	249.968	41.7335	249.853
26.8228	241.153	30.9767	248.84	31.7758	249.802	28.7712	249.888	37.5058	249.744	--	--	27.132	249.956	27.8417	249.956	41.5846	249.968	41.564	249.882
26.9905	242.115	--	--	31.948	249.974	28.7723	249.888	37.5048	249.946	35.7076	249.529	27.1323	249.956	27.8421	249.956	41.5848	249.968	41.7349	249.853
27.1588	242.88	30.9762	249.643	31.9506	249.974	28.7735	249.888	37.6739	250.119	35.8764	249.904	26.9623	249.984	27.8424	249.956	41.2446	250.025	41.5654	249.882
27.3265	243.845	31.1473	250.016	31.783	250.003	28.7746	249.888	37.5034	250.148	35.7061	249.932	27.303	249.927	28.013	249.927	41.5853	249.968	41.9065	249.824
27.4949	244.612	31.1496	250.016	31.9558	249.974	28.7758	249.888	37.5031	250.148	35.8762	249.904	27.133	249.956	27.8431	249.956	41.7557	249.939	41.737	249.853
27.493	245.409	31.3221	249.988	32.1287	249.946	28.7769	249.888	37.673	250.119	35.8761	249.904	27.1333	249.956	28.0137	249.927	41.7559	249.939	41.7377	249.853
27.8316	246.151	31.1542	250.016	32.1313	249.946	28.9483	249.86	37.6726	250.119	36.0462	249.875	27.3037	249.927	28.014	249.927	41.5859	249.968	41.9086	249.824
27.6595	246.979	31.3267	249.988	32.3041	249.917	28.9494	249.86	37.5021	250.148	35.876	249.904	27.4742	249.898	28.0144	249.927	41.5861	249.968	41.7391	249.853
27.8271	247.951	31.329	249.988	32.1365	249.946	28.7804	249.888	37.672	250.119	36.0461	249.875	27.3042	249.927	28.1849	249.899	41.5864	249.968	41.91	249.824
27.9955	248.725	31.1611	250.016	32.1392	249.946	29.1219	249.831	37.8419	250.09	35.8758	249.904	27.4747	249.898	28.1853	249.899	41.7568	249.939	42.0803	249.998
--	--	31.5038	249.959	32.1418	249.946	29.1231	249.831	37.8416	250.09	36.2154	250.048	27.3047	249.927	28.0154	249.927	41.4166	249.997	41.9115	249.824
28.1638	249.5	31.5061	249.959	32.1444	249.946	28.954	249.86	37.8412	250.09	36.216	249.846	27.6454	249.87	28.0158	249.927	41.7572	249.939	42.0817	249.998
27.8229	249.959	31.6786	249.93	32.3172	249.917	29.2956	249.802	37.8409	250.09	36.216	249.846	27.4754	249.898	28.1863	249.899	41.7575	249.939	42.0824	249.998
28.3344	249.873	31.3405	249.988	32.1497	249.946	29.2967	249.802	37.8406	250.09	36.2159	249.846	27.6459	249.87	28.1867	249.899	41.9279	249.911	42.2533	249.969
28.165	249.902	31.513	249.959	32.3225	249.917	29.2972	250.003	37.8403	250.09	36.386	249.818	27.6461	249.87	28.3572	249.87	41.7579	249.939	42.254	249.969
28.1659	249.902	31.5146	250.16	32.3251	249.917	29.299	249.802	37.8399	250.09	36.3859	249.818	27.6464	249.87	28.3576	249.87	41.9284	249.911	41.9143	250.027
28.3369	249.873	31.5176	249.959	32.4979	249.888	29.13	249.831	38.0098	250.061	36.2156	249.846	27.6467	249.87	28.3573	250.071	41.7584	249.939	42.2554	249.969
28.508	249.844	31.6894	250.131	32.3304	249.917	29.3013	249.802	38.0095	250.061	36.3851	250.02	27.4767	249.898	28.3583	249.87	41.7586	249.939	42.2561	249.969
28.5082	250.045	31.5221	249.959	32.6734	249.859	29.3025	249.802	38.0092	250.061	36.3857	249.818	27.6471	249.87	28.3586	249.87	41.929	249.911	42.0866	249.998
28.6799	249.816	31.694	250.131	32.5058	249.888	29.4738	249.774	38.0089	250.061	36.5551	249.991	27.9878	249.812	28.359	249.87	41.9292	249.911	42.2575	249.969
28.8503	249.988	31.5267	249.959	32.5084	249.888	29.3047	249.802	38.0085	250.061	36.555	249.991	27.8179	249.841	28.5295	249.841	41.9295	249.911	42.4284	249.94
28.6816	249.816	31.529	249.959	32.6813	249.859	29.4761	249.774	38.0082	250.061	36.3847	250.02	27.8181	249.841	28.5299	249.841	41.9297	249.911	42.4291	249.94
28.852	249.988	31.7015	249.93	32.6839	249.859	29.4773	249.774	38.0079	250.061	36.7251	249.962	27.9886	249.812	28.5302	249.841	42.1001	249.882	42.4299	249.94
29.0231	249.959	31.5336	249.959	32.6865	249.859	29.4784	249.774	38.0076	250.061	36.7257	249.76	27.9881	250.013	28.3604	249.87	41.9301	249.911	42.4305	249.94
29.0239	249.959	31.7054	250.131	32.8593	249.831	29.6498	249.745	38.0072	250.061	36.7249	249.962	27.9884	250.013	28.7011	249.812	41.9304	249.911	42.7717	249.883
29.0248	249.959	31.7077	250.131	32.6917	249.859	29.4807	249.774	38.3473	250.004	36.7248	249.962	28.1589	249.985	28.3604	250.071	41.9306	249.911	42.6022	249.912
29.0256	249.959	31.5405	249.959	32.8646	249.831	29.8216	249.917	38.1768	250.033	36.7248	249.962	27.9896	249.812	28.5316	249.841	42.101	249.882	42.6029	249.912
29.0265	249.959	31.8825	250.103	32.8672	249.831	29.483	249.774	38.346	250.206	36.7247	249.962	28.1593	249.985	28.5313	250.042	41.931	249.911	42.944	249.854
29.0273	249.959	31.8848	250.103	33.04	249.802	29.4841	249.774	38.1754	250.235	36.8948	249.934	28.1596	249.985	28.7025	249.812	42.1015	249.882	42.7745	249.883
29.1984	249.931	32.0573	250.074	32.8718	250.032	29.4853	249.774	38.0056	250.061	37.0649	249.905	28.1605	249.784	28.5327	249.841	41.9315	249.911	42.9454	249.854
29.1993	249.931	32.0596	250.074	32.8751	249.831	29.4864	249.774	38.3457	250.004	36.8946	249.934	28.1601	249.985	28.5324	250.042	42.1019	249.882	43.1156	250.028
29.2001	249.931	31.8917	250.103	32.8777	249.831	29.4869	249.975	38.1752	250.033	36.8946	249.934	28.3306	249.956	28.5334	249.841	42.2723	249.853	42.6064	249.912
29.0308	249.959	32.0642	250.074	33.0498	250.003	29.6589	249.745	38.3444	250.206	36.7243	249.962	28.3308	249.956	28.7039	249.812	41.9321	249.911	43.1177	249.826
29.2018	249.931	32.0665	250.074	33.0525	250.003	29.6594	249.946	38.3447	250.004	36.8944	249.934	28.1609	249.985	28.5334	250.042	42.1026	249.882	43.1184	249.826
29.2027	249.931	31.8985	250.103	33.0551	250.003	29.6605	249.946	38.1735	250.235	37.0645	249.905	28.3313	249.956	28.8748	249.784	41.9326	249.911	42.7787	249.883
29.2035	249.931	32.2413	250.045	33.0577	250.003	29.8319	249.917	38.3441	250.004	36.8942	249.934	28.3316	249.956	28.5341	250.042	42.2732	249.853	42.7794	249.883
29.3746	249.902	32.0733	250.074	33.2305	249.974	29.6635	249.745	38.3431	250.206	37.2346	249.876	28.502	249.927	28.7053	249.812	42.1032	249.882	42.7801	249.883
29.3755	249.902	32.0756	250.074	32.8934	249.831	29.8342	249.917	38.3434	250.004	37.0643	249.905	28.5023	249.927	28.705	250.014	42.1035	249.882	42.951	249.854
29.3763	249.902	32.0779	250.074	33.2365	249.773	29.6651	249.946	38.5126	250.177	37.0642	249.905	28.5025	249.927	28.8756	249.985	42.1037	249.882	42.9517	249.854
29.5474	249.873	32.0802	250.074	33.2384	249.974	30.0067	249.889	38.1726	250.033	36.8939	249.934	28.5028	249.927	28.7057	250.014	42.1039	249.882	42.9524	249.854
29.378	249.902	32.0825	250.074	32.9006	250.032	29.8383	249.716	38.3418	250.206	37.064	249.905	28.3328	249.956	28.7067	249.812	41.9339	249.911	43.1234	249.826
29.5491	249.873	32.0848	250.074	33.2437	249.974	29.6686	249.946	38.3421	250.004	37.064	249.905	28.6735	249.899	28.7064	250.014	42.1044	249.882	42.9539	249.854
29.5499	249.873	32.2573	250.045	33.2463	249.974	29.8399	249.917	38.5113	250.177	37.4043	249.847	28.5035	249.927	28.7074	249.812	42.1046	249.882	42.9539	250.057
29.5508	249.873	32.0894	250.074	33.4191	249.946	30.0113	249.889	38.3408	250.206	37.234	249.876	28.5038	249.927	28.7078	249.812	42.4452	249.824	43.2957	249.797
29.5517	249.873	32.2619	250.045	33.2515	249.974	29.8422	249.917	38.5114	249.975	37.4041	249.847	28.504	249.927	29.0479	249.956	42.2752	249.853	43.1262	249.826
29.5525	249.873	32.2642	250.045	33.2542	249.974	29.8434	249.917	38.3401	250.206	37.2338	249.876	28.6745	249.899	28.878	249.985	42.2755	249.853	43.1269	249.826
29.5534	249.873	32.2665	250.045	33.0866	250.003	29.8452	249.716	38.3405	250.004	37.0636	249.905	28.5045	249.927	28.7088	249.812	42.1055	249.882	42.9574	249.854
29.5542	249.873	32.2687	250.045	33.2594	249.974	29.8456	249.917	38.5097	250.177	37.4039	249.847	28.675	249.899	28.8787	249.985	42.2759	249.853	43.1283	249.826
29.5551	249.873	32.4412	250.017	33.262	249.974	30.1872	249.86	38.5094	250.177	37.2336	249.876	28.505	249.927	28.8797	249.784	42.1059	249.882	43.129	249.826
29.7262	249.845	32.2733	250.045	33.0944	250.003	29.8479	249.917	38.6793	250.149	37.4037	249.847	28.5053	249.927	28.7092	250.014	42.2764	249.853	43.129	250.028
29.5568	249.873	32.2756	250.045	33.4375	249.946	30.1895	249.86	38.8491	250.12	37.4036	249.847	28.5055	249.927	28.7095	250.014	42.1064	249.882	43.2999	249.999
29.7279	249.845	32.4481	250.017	33.4401	249.946	29.8502	249.917	38.6786	250.149	37.2334	249.876	28.676	249.899	28.8808	249.784	41.9364	249.911	43.3006	249.999
29.728	250.046	32.6206	249.988	33.2725	249.974	29.8514	249.917	38.6783	250.149	37.4035	249.847	28.6763	249.899	28.7102	250.014	42.1068	249.882	43.1311	250.028
29.8998	249.816	32.4527	250.017	33.4453	249.946	30.1929	249.86	38.5078	250.177	37.2332	249.876	28.6765	249.899	28.8808	249.985	42.107	249.882	43.302	249.999
29.9	250.017	32.6252	249.988	33.6182	249.917	30.0239	249.889	38.6776	250.149	37.2331	249.876	28.6768	249.899	28.8818	249.784	42.1073	249.882	43.3034	249.797
29.7313	249.845	32.4573	250.017	33.2804	249.974	30.025	249.889	38.8475	250.12	37.4032	249.847	28.8472	249.87	28.8815	249.985	42.2777	249.853	43.3034	249.999
29.7321	249.845	32.4596	250.017	33.6234	249.917	30.0262	249.889	38.8472	250.12	37.4032	249.847	28.6773	249.899	28.8818	249.985	42.2779	249.853	43.475	249.768
29.733	249.845	32.6321	249.988	33.4558	249.946	30.0273	249.889	38.6767	250.149	37.4031	249.847	28.8477	249.87	29.0524	249.956	42.2781	249.853	43.3049	249.999
29.9041	249.816	32.4642	250.017	33.2882	249.974	30.0285	249.889	38.8465	250.12	37.403	249.847	28.6778	249.899	29.0527	249.956	42.4479	250.027	43.3055	249.999
29.9042	250.017	32.6367	249.988	33.2916	249.773	30.0296	249.889	38.676	250.149	37.4029	249.847	28.8482	249.87	28.8829	249.985	42.2786	249.853	43.6467	249.942
29.7356	249.845	32.4688	250.017	33.4637	249.946	30.0308	249.889	38.6757	250.149	37.4028	249.847	28.8485	249.87	28.8832	249.985	42.2788	249.853	43.4772	249.971
29.9066	249.816	32.8115	249.959	33.4663	249.946	30.0319	249.889	38.6754	250.149	37.4021	250.049	28.8487	249.87	28.8836	249.985	42.279	249.853	43.6481	249.942
29.7373	249.845	32.6435	249.988	33.4689	249.946	30.2033	249.86	38.8452	250.12	37.5729	249.819	28.849	249.87	29.0541	249.956	42.2793	249.853	43.4786	249.971
29.9083	249.816	32.4756	250.017	33.4716	249.946	30.0342	249.889	38.8449	250.12	37.5728	249.819	28.8492	249.87	29.2247	249.928	42.4497	249.824	43.4793	249.971
29.9085	250.017	32.6481	249.988	33.4742	249.946	30.2056	249.86	38.8446	250.12	37.572	250.021	28.8495	249.87	29.0548	249.956	42.2797	249.853	43.3098	249.999
30.0803	249.787	32.8206	249.959	33.3066	249.974	30.2067	249.86	38.8443	250.12	37.572	250.021	28.8497	249.87	29.0552	249.956	42.4501	249.824	43.4807	249.971
29.9102	250.017	32.8229	249.959	33.6496	249.917	30.0376	249.889	38.8439	250.12	37.7428	249.79	29.0202	249.841	29.0555	249.956	42.4504	249.824	43.4814	249.971
30.082	249.787	32.655	249.988	33.3118	249.974	30.0388	249.889	38.8436	250.12	37.742	249.992	28.8502	249.87	29.0559	249.956	42.4506	249.824	43.6523	249.942
30.0821	249.988	32.8275	249.959	33.4847	249.946	30.2101	249.86	39.0135	250.091	37.5724	249.819	28.8505	249.87	29.0562	249.956	42.2806	249.853	43.653	249.942
29.9135	249.816	32.8291	250.16	33.4873	249.946	30.2113	249.86	39.0132	250.091	37.912	249.963	28.8507	249.87	29.2268	249.928	42.451	249.824	43.4835	249.971
30.0839	249.988	32.8314	250.16	33.8303	249.888	30.0422	249.889	39.0129	250.091	37.912	249.963	28.851	249.87	29.2272	249.928	42.4513	249.824	43.4842	249.971
30.0847	249.988	32.8344	249.959	33.6628	249.917	30.0434	249.889	38.8423	250.12	37.7417	249.992	28.8512	249.87	29.0573	249.956	42.4508	250.027	43.4849	249.971
30.0856	249.988	32.836	250.16	33.4952	249.946	30.2147	249.86	38.842	250.12	37.5714	250.021	28.8508	250.071	29.2278	249.928	42.6219	249.796	43.4863	249.768
30.2566	249.96	33.0092	249.93	33.3276	249.974	30.2159	249.86	39.0119	250.091	37.7415	249.992	29.1922	249.812	29.058	249.956	42.6214	249.998	43.4863	249.971
30.2575	249.96	32.8406	250.16	33.5004	249.946	29.8766	249.917	38.8413	250.12	37.7414	249.992	29.0222	249.841	29.2285	249.928	42.2819	249.853	43.6572	249.942
30.0881	249.988	32.8428	250.16	33.6733	249.917	30.2182	249.86	38.6708	250.149	37.9122	249.761	29.0224	249.841	29.2289	249.928	42.2822	249.853	43.4877	249.971
30.089	249.988	33.0153	250.132	33.5057	249.946	30.2193	249.86	39.0109	250.091	37.7413	249.992	29.0227	249.841	29.059	249.956	42.2824	249.853	43.4884	249.971
30.0898	249.988	33.0176	250.132	33.5083	249.946	30.2205	249.86	39.0106	250.091	37.7412	249.992	29.1932	249.812	29.2296	249.928	42.4528	249.824	43.6594	249.942
30.4311	249.931	32.8504	249.959	33.6811	249.917	30.3918	249.831	39.0103	250.091	37.9113	249.963	29.0225	250.042	29.0597	249.956	42.2828	249.853	43.6601	249.942
30.2618	249.96	33.0222	250.132	33.5135	249.946	30.393	249.831	39.0099	250.091	37.741	249.992	29.1937	249.812	29.0601	249.956	42.4533	249.824	43.831	249.913
30.2626	249.96	33.1947	250.103	33.6864	249.917	30.3941	249.831	39.1798	250.063	37.9111	249.963	29.0237	249.841	29.0604	249.956	42.2833	249.853	43.6615	249.942
30.0933	249.988	32.8573	249.959	33.689	249.917	30.5655	249.803	39.1795	250.063	38.0813	249.935	29.1935	250.014	29.231	249.928	42.2835	249.853	43.492	249.971
30.4345	249.931	33.0291	250.132	33.6916	249.917	30.5666	249.803	39.009	250.091	37.7408	249.992	29.1944	249.812	29.0611	249.956	42.4532	250.027	43.4927	249.971
30.2652	249.96	33.2016	250.103	33.8644	249.888	30.2274	249.86	39.0086	250.091	37.9109	249.963	29.0245	249.841	29.2317	249.928	42.4542	249.824	43.6636	249.942
30.4363	249.931	33.2039	250.103	33.8671	249.888	30.3987	249.831	38.8381	250.12	37.9108	249.963	29.1942	250.014	29.4022	249.899	42.2842	249.853	43.6643	249.942
30.2669	249.96	33.2062	250.103	33.8697	249.888	30.3999	249.831	39.1782	250.063	37.7405	249.992	29.3647	249.985	29.2324	249.928	42.2844	249.853	43.665	249.942
30.2678	249.96	33.2085	250.103	33.8723	249.888	30.401	249.831	39.1779	250.063	37.9107	249.963	29.0245	250.042	29.2327	249.928	42.2846	249.853	43.8359	249.913
30.4388	249.931	33.0406	250.132	33.8749	249.888	30.4021	249.831	39.0073	250.091	37.9106	249.963	29.0255	249.841	29.0629	249.956	42.1146	249.882	43.8366	249.913
30.2695	249.96	33.0435	249.93	33.8776	249.888	30.5735	249.803	39.007	250.091	37.9105	249.963	29.0257	249.841	29.2334	249.928	42.2851	249.853	43.6671	249.942
30.2703	249.96	33.2154	250.103	33.8802	249.888	30.4044	249.831	38.8365	250.12	37.9104	249.963	29.1962	249.812	29.2338	249.928	42.2853	249.853	43.838	249.913
30.4414	249.931	33.0474	250.132	34.053	249.86	30.5758	249.803	39.1766	250.063	38.0806	249.935	29.0262	249.841	29.2341	249.928	42.1153	249.882	44.0089	249.884
30.4422	249.931	33.2206	249.902	33.8854	249.888	30.5769	249.803	39.1763	250.063	38.0805	249.935	29.0265	249.841	29.2345	249.928	42.2857	249.853	43.8394	249.913
30.4431	249.931	33.052	250.132	34.0583	249.86	30.5781	249.803	39.1759	250.063	38.0804	249.935	29.0267	249.841	29.405	249.899	42.286	249.853	43.8401	249.913
30.444	249.931	33.2245	250.103	34.0609	249.86	30.5792	249.803	39.1756	250.063	38.0803	249.935	29.0263	250.042	29.2352	249.928	42.2862	249.853	43.8408	249.913
30.2746	249.96	33.0566	250.132	33.8933	249.888	30.5804	249.803	39.0051	250.091	37.91	249.963	29.1974	249.812	29.0653	249.956	42.1162	249.882	43.8415	249.913
30.6159	249.902	33.2291	250.103	33.8959	249.888	30.5815	249.803	39.175	250.063	37.9099	249.963	29.0268	250.042	29.2359	249.928	42.2866	249.853	43.8422	249.913
30.4465	249.931	33.2314	250.103	33.8985	249.888	30.5827	249.803	39.1746	250.063	38.0801	249.935	29.1979	249.812	29.2362	249.928	42.4571	249.824	44.0132	249.884
30.2772	249.96	33.2337	250.103	33.9012	249.888	30.5838	249.803	39.1743	250.063	37.9098	249.963	29.1982	249.812	29.2366	249.928	42.2871	249.853	44.0139	249.884
30.278	249.96	33.236	250.103	33.7336	249.917	30.4148	249.831	39.174	250.063	38.0799	249.935	29.1984	249.812	29.4071	249.899	42.4568	250.027	43.8443	249.913
30.6193	249.902	33.4092	249.873	33.9064	249.888	30.4159	249.831	39.1737	250.063	37.9096	249.963	29.0278	250.042	29.4075	249.899	42.4577	249.824	44.0153	249.884
30.45	249.931	33.2406	250.103	33.909	249.888	30.5873	249.803	39.1733	250.063	37.9095	249.963	29.0287	249.841	29.2376	249.928	42.4579	249.824	43.8458	249.913
30.4508	249.931	33.2435	249.902	33.9117	249.888	30.5884	249.803	39.173	250.063	38.0797	249.935	29.1985	250.014	29.238	249.928	42.6284	249.796	44.0167	249.884
30.4517	249.931	33.4153	250.074	33.9143	249.888	30.4194	249.831	39.1727	250.063	38.0796	249.935	29.1988	250.014	29.2383	249.928	42.6286	249.796	44.0174	249.884
30.4525	249.931	33.4177	250.074	33.9169	249.888	30.5907	249.803	39.1724	250.063	38.2497	249.906	29.3692	249.985	29.4089	249.899	42.4579	250.027	44.0181	249.884
30.6236	249.902	33.4199	250.074	34.0897	249.86	30.5919	249.803	39.172	250.063	38.2496	249.906	29.1993	250.014	29.4092	249.899	42.2886	249.853	44.0188	249.884
30.6244	249.902	33.252	250.103	34.0924	249.86	30.5923	250.004	39.1717	250.063	38.0793	249.935	29.2002	249.812	29.4096	249.899	--	--	44.0195	249.884
30.6253	249.902	33.2543	250.103	34.095	249.86	30.4239	249.831	39.1714	250.063	38.0793	249.935	29.1998	250.014	29.4099	249.899	42.4591	249.824	44.0202	249.884
30.6261	249.902	33.4268	250.074	33.9274	249.888	30.5953	249.803	39.3413	250.034	38.4196	249.877	29.3702	249.985	29.4103	249.899	42.2918	249.045	44.1911	249.856
30.4568	249.931	33.2589	250.103	34.1002	249.86	30.5958	250.004	39.3409	250.034	38.2493	249.906	29.3705	249.985	29.4106	249.899	42.2934	248.642	44.1918	249.856
30.6279	249.902	33.4314	250.074	34.1028	249.86	30.4274	249.831	39.1704	250.063	38.079	249.935	29.2005	250.014	29.411	249.899	42.4666	247.807	--	--
30.7989	249.874	33.2642	249.902	34.1055	249.86	--	--	39.3403	250.034	38.4193	249.877	29.2015	249.812	29.4113	249.899	42.4696	247.003	43.6853	248.932
30.6296	249.902	33.436	250.074	34.1081	249.86	30.5987	249.803	39.1698	250.063	38.249	249.906	29.3712	249.985	29.4117	249.899	42.1321	246.256	44.0271	248.672
30.8006	249.874	33.4383	250.074	--	--	30.092	249.084	39.3389	250.236	38.249	249.906	29.3715	249.985	29.7524	249.842	42.3059	245.225	44.0313	247.664
30.6313	249.902	33.4406	250.074	34.11	250.061	30.6051	248.597	39.3393	250.034	38.2489	249.906	29.3717	249.985	29.4124	249.899	42.3089	244.423	44.2042	247.032
30.6321	249.902	33.4428	250.074	34.7983	248.539	30.4395	247.622	39.3383	250.236	38.2488	249.906	--	--	29.4127	249.899	42.1416	243.652	44.0382	246.055
30.633	249.902	33.4451	250.074	34.1201	248.654	30.6136	246.792	39.3387	250.034	38.2487	249.906	29.372	249.985	--	--	42.1452	242.654	44.0416	245.252
30.6338	249.902	33.4474	250.074	33.9559	247.68	30.6174	245.992	39.5085	250.005	38.2486	249.906	29.377	248.578	29.5826	250.072	42.3177	242.027	43.8748	244.479
30.8049	249.874	33.2795	250.103	34.1314	246.851	30.6213	245.193	39.5075	250.207	38.4188	249.877	29.3773	248.578	29.9281	248.606	42.1511	241.06	43.8782	243.679
30.6356	249.902	33.6222	250.045	33.9666	246.08	30.6252	244.396	39.5079	250.005	38.2485	249.906	29.3803	247.775	29.4179	248.692	42.154	240.265	43.8817	242.879
30.6364	249.902	33.4543	250.074	33.9719	245.281	30.4588	243.628	39.5076	250.005	38.0782	249.935	29.3832	246.974	29.5918	247.66	42.3272	239.442	43.8858	241.882
30.8075	249.874	33.4566	250.074	33.9772	244.484	30.6335	242.605	--	--	38.4185	249.877	29.216	246.202	29.4247	246.888	42.1599	238.678	43.8892	241.085
30.8083	249.874	33.4589	250.074	34.1535	243.46	30.6374	241.811	39.5072	250.005	--	--	29.3898	245.175	29.4278	246.087	42.1628	237.886	43.5522	240.346
30.8092	249.874	--	--	33.9886	242.694	30.6412	241.018	39.6799	249.169	38.4184	249.877	29.3928	244.377	29.4308	245.288	42.1664	236.898	43.7258	239.523
30.6398	249.902	33.6314	250.045	33.9939	241.9	30.4748	240.255	39.3405	248.823	38.2509	249.099	29.2256	243.609	29.4339	244.49	41.9991	236.138	43.7292	238.73
30.8109	249.874	34.1464	249.356	33.9992	241.107	30.3091	239.296	39.1734	247.845	38.4224	248.667	29.2285	242.814	29.2674	243.523	42.0027	235.153	43.7332	237.739
30.982	249.845	33.3004	248.696	34.0045	240.316	30.4832	238.478	39.346	247.012	38.2555	247.688	29.2315	242.019	29.4407	242.699	42.0055	234.366	43.7366	236.948
30.8126	249.874	33.4756	247.865	33.8396	239.554	30.487	237.69	39.5186	246.18	38.4277	247.056	29.4053	240.999	29.4437	241.904	41.8382	233.61	43.74	236.159
30.8135	249.874	33.4806	247.064	33.6754	238.597	30.4908	236.903	39.3508	245.407	38.2608	246.081	29.238	240.236	29.4468	241.111	42.0113	232.797	43.7434	235.37
30.8143	249.874	33.6558	246.235	33.8509	237.78	30.3244	236.146	39.3532	244.606	38.2635	245.279	29.0708	239.474	29.2796	240.348	41.8447	231.847	43.7475	234.386
30.8152	249.874	33.4906	245.465	33.8562	236.994	30.3289	235.165	39.5258	243.778	38.0959	244.507	29.0737	238.685	29.2827	239.557	41.8476	231.065	43.7508	233.6
30.816	249.874	33.4963	244.468	33.8622	236.012	30.3327	234.382	39.1878	243.037	38.0986	243.707	29.2475	237.671	29.2864	238.57	42.0206	230.255	43.584	232.844
--	--	33.5006	243.871	33.6972	235.257	30.1663	233.629	39.1902	242.24	38.2714	242.88	29.2504	236.884	29.1192	237.81	41.8533	229.505	43.7576	232.031
30.8169	249.874	33.3361	242.906	33.7025	234.474	30.1701	232.848	39.3635	241.216	38.1045	241.912	28.9129	236.156	29.1222	237.023	41.8568	228.532	43.7616	231.053
30.8205	249.069	33.3411	242.112	33.7078	233.692	30.1746	231.873	39.1956	240.45	38.1071	241.116	29.0867	235.146	29.2954	236.208	41.8597	227.755	43.5948	230.3
30.8227	248.667	33.3461	241.319	33.7138	232.717	30.1784	231.095	39.3682	239.627	38.2799	240.293	29.2599	234.334	29.2991	235.227	42.0328	226.951	43.4279	229.549
30.827	247.664	33.3517	240.329	33.5488	231.966	30.1828	230.123	39.2011	238.665	37.9422	239.556	29.0926	233.581	29.3021	234.444	41.8654	226.205	43.6021	228.547
31.0008	246.834	33.3567	239.539	33.7243	231.159	30.0164	229.376	39.0325	238.101	38.115	238.735	29.2657	232.771	29.1349	233.69	41.6987	225.267	43.4353	227.798
30.8341	246.062	33.3617	238.75	33.3898	230.246	30.1904	228.573	39.0356	237.113	37.9481	237.775	29.0984	232.02	29.1386	232.714	41.7016	224.495	43.4386	227.022
30.8377	245.263	33.1964	237.991	33.7355	229.413	30.0246	227.635	39.0379	236.324	38.1209	236.956	29.1019	231.047	29.1416	231.934	41.7051	223.531	43.2724	226.082
30.6711	244.494	33.3723	236.979	33.5705	228.667	30.0284	226.863	39.041	235.34	38.1235	236.167	28.9346	230.298	29.1446	231.155	41.5377	222.79	43.6162	225.25
30.8455	243.469	33.3772	236.193	33.5764	227.701	30.2024	226.063	39.383	234.692	38.1267	235.183	29.1077	229.494	29.1483	230.183	41.7107	221.993	43.6195	224.477
30.8491	242.673	33.0418	235.466	33.4115	226.958	30.0359	225.322	39.0456	233.768	38.1293	234.396	28.7708	228.583	29.1513	229.407	41.7136	221.226	43.4533	223.542
30.6824	241.908	33.2176	234.459	33.5869	226.158	30.0404	224.361	39.048	232.984	37.9617	233.64	28.7737	227.809	29.1542	228.632	41.5468	220.297	43.4566	222.772
30.686	241.115	33.0523	233.706	33.5928	225.197	30.0441	223.594	39.0503	232.202	37.9643	232.856	28.9468	227.008	28.9877	227.694	41.5497	219.533	43.4599	222.003
30.8597	240.294	33.2275	232.896	33.5981	224.429	30.0485	222.637	39.0533	231.225	38.1371	232.044	29.1206	226.015	28.8204	226.95	41.3829	218.607	43.6341	221.014
30.8633	239.503	32.8927	231.98	33.6033	223.662	30.0523	221.872	39.2252	230.61	37.7999	231.125	28.9532	225.274	28.9936	226.15	41.556	217.816	43.4672	220.277
30.8675	238.516	33.0678	231.173	33.439	222.733	29.8864	220.946	39.058	229.665	37.9727	230.316	28.9561	224.505	28.9966	225.38	41.5594	216.865	43.4705	219.511
30.7008	237.756	33.0728	230.396	33.4448	221.778	29.8902	220.184	38.8901	228.916	37.8051	229.565	28.7894	223.575	29.0002	224.419	41.392	216.135	43.4744	218.556
30.7044	236.969	33.0777	229.62	33.2792	221.235	29.8939	219.423	38.8931	227.945	37.8083	228.593	28.9625	222.78	29.1734	223.623	41.3955	215.187	43.4778	217.794
30.5383	236.015	33.0826	228.846	33.2851	220.282	29.8976	218.663	38.8954	227.169	37.8108	227.816	28.6255	221.881	28.8366	222.722	41.3983	214.43	43.3115	216.871
30.5419	235.231	33.0882	227.879	33.2909	219.331	29.902	217.715	39.0679	226.366	37.8134	227.041	28.7986	221.089	29.0097	221.928	41.401	213.674	43.485	216.082
30.5454	234.447	32.9229	227.136	33.1259	218.601	29.7355	216.987	38.9006	225.429	37.8166	226.073	28.8014	220.327	28.8425	221.193	41.4045	212.731	43.3181	215.352
30.5496	233.47	32.9285	226.172	33.3013	217.814	29.7399	216.042	39.0731	224.628	37.8191	225.3	28.8049	219.375	28.8461	220.24	41.4073	211.977	43.3213	214.594
30.5531	232.689	32.9334	225.403	33.3072	216.868	29.9138	215.258	38.9059	223.694	37.6515	224.557	28.8078	218.615	28.849	219.479	41.4107	211.037	43.3253	213.648
30.5566	231.909	32.9383	224.634	33.3124	216.112	29.5778	214.374	38.738	222.954	37.8249	223.565	28.8106	217.857	28.6824	218.558	41.2433	210.316	43.159	212.733
30.3899	231.159	32.9438	223.675	33.3182	215.169	29.7517	213.593	38.9105	222.157	37.6572	222.825	28.6439	216.939	28.8555	217.77	41.0765	209.408	43.1622	211.979
30.394	230.187	32.7785	222.938	33.1531	214.445	29.756	212.654	38.9128	221.39	37.6604	221.865	28.6467	216.182	28.6888	216.852	41.0792	208.659	43.1661	211.038
30.5677	229.382	32.9536	222.145	32.9881	213.722	29.7597	211.904	38.7455	220.462	37.6629	221.098	28.6501	215.239	28.862	216.067	41.2528	207.697	42.9992	210.316
30.5712	228.607	32.9592	221.191	33.3344	212.726	29.7634	211.156	38.7478	219.697	37.6654	220.333	28.653	214.485	28.6947	215.341	41.2556	206.951	43.0025	209.565
30.4045	227.862	32.7945	220.267	33.3395	211.977	29.5975	210.251	38.7507	218.743	37.6679	219.568	28.6558	213.733	28.8684	214.37	41.0888	206.05	43.0063	208.629
30.408	227.089	32.7994	219.506	33.1751	211.071	29.6018	209.319	38.5827	218.01	37.3307	218.672	28.6592	212.794	28.7011	213.646	41.0915	205.307	43.0102	207.695
30.4121	226.125	32.634	218.775	32.8399	210.382	29.4353	208.603	38.585	217.25	37.5041	217.691	28.6626	211.856	28.5345	212.736	40.9247	204.409	43.0135	206.949
30.4156	225.355	32.6395	217.828	33.0159	209.421	29.6098	207.645	38.7581	216.272	37.5066	216.931	28.4952	211.137	28.7076	211.957	41.0976	203.639	43.0173	206.018
30.2495	224.423	32.6444	217.071	33.021	208.677	29.4433	206.932	38.5902	215.542	37.5091	216.172	28.6689	210.174	28.5403	211.237	40.9308	202.744	43.0206	205.274
30.5934	223.598	32.6493	216.315	33.0268	207.748	29.4476	206.006	38.7632	214.568	37.5122	215.224	28.5014	209.457	28.5438	210.303	40.9335	202.006	42.8542	204.375
30.4267	222.86	32.4846	215.4	32.8617	207.036	29.6214	205.238	38.5953	213.841	37.5147	214.468	28.5042	208.712	28.7175	209.341	40.9369	201.085	42.8574	203.634
30.4308	221.904	32.4894	214.647	32.8675	206.11	29.4555	204.344	38.2578	212.956	37.3476	213.552	28.3374	207.811	28.5502	208.625	40.7694	200.379	42.8613	202.709
30.264	221.168	32.6651	213.678	33.0435	205.158	29.4592	203.607	38.6004	212.145	37.1799	212.827	28.3402	207.069	28.5537	207.696	40.7727	199.461	42.8645	201.97
30.2681	220.215	32.4998	212.956	32.8784	204.449	29.4634	202.688	38.2629	211.263	37.3532	211.857	28.684	206.085	28.5566	206.954	40.7761	198.546	42.8677	201.233
30.2716	219.454	32.5052	212.02	32.7139	203.557	29.2969	201.982	38.4353	210.484	37.3557	211.105	28.347	205.219	28.5595	206.212	40.7788	197.814	42.8715	200.313
30.2756	218.504	32.6803	211.243	32.8893	202.793	29.3011	201.066	38.4375	209.735	37.3588	210.167	28.3498	204.48	28.563	205.288	40.7821	196.902	42.8754	199.395
30.1089	217.774	32.6857	210.309	32.895	201.876	29.4756	200.123	38.6106	208.771	37.1911	209.447	28.3531	203.559	28.5664	204.365	40.7854	195.991	42.709	198.507
30.1123	217.016	32.5204	209.592	32.9001	201.143	29.4792	199.393	38.4426	208.053	37.1935	208.699	28.3559	202.823	28.5693	203.628	40.6179	195.292	42.7122	197.775
30.1164	216.071	32.3556	208.691	32.7356	200.258	29.3126	198.692	38.2752	207.15	37.0264	207.795	28.3593	201.905	28.4026	202.737	40.6206	194.566	42.5458	196.89
[truncated: 260 more rows]

## Sheet: Fig.2-Hardness of S3
File		H(GPa)
al-3-position 1		2.59218
al-3-position 2		2.40293
[truncated: 8 more rows]

## Sheet: Fig.3-Sample 1
Cu-1-position 1		Cu-1-position 2		Cu-1-position 3		Cu-1-position 4		Cu-1-position 5		Cu-1-position 6		Cu-1-position 7		Cu-1-position 8		Cu-1-position 9		Cu-1-position 10
[truncated: 862 more rows]

[truncated: 9 more sheets: Fig.3-Hardness of S1, Fig.3-Sample 2, Fig.3-Hardness of S2, Fig.3-Sample 3, Fig.3-Hardness of S3, Fig.4-Sample 1, Fig.4-Hardness of S1, Fig.4-Sample 2, Fig.4-Hardness of S2]
